# Supplementary material for: Feasibility study for supporting medication adherence for adults with cystic fibrosis: mixed-methods process evaluation
Source: PubMed Central journal article supplement (PMC7592300; doi:10.1136/bmjopen-2020-039089), 2020-10-27
Supplement: bmjopen-2020-039089.draft_revisions.pdf [file bmjopen-2020-039089.draft_revisions.pdf]

# BMJ Open

BMJ Open is committed to open peer review. As part of this commitment we make the peer review history of every article we publish publicly available.

When an article is published we post the peer reviewers' comments and the authors' responses online. We also post the versions of the paper that were used during peer review. These are the versions that the peer review comments apply to.

The versions of the paper that follow are the versions that were submitted during the peer review process. They are not the versions of record or the final published versions. They should not be cited or distributed as the published version of this manuscript.

BMJ Open is an open access journal and the full, final, typeset and author-corrected version of record of the manuscript is available on our site with no access controls, subscription charges or pay-per-view fees (<http://bmjopen.bmj.com>).

If you have any questions on BMJ Open's open peer review process please email [info.bmjopen@bmj.com](mailto:info.bmjopen@bmj.com)

# BMJ Open

## Feasibility study for supporting medication adherence for adults with cystic fibrosis: mixed-methods process evaluation

|                               |                                                                                                                                                                                                                                                                                                                                                                                                                                                                                                                                                                                                                                                                                                                                                                                                                                                                                                                                                                                                                                                                                                                                                                                                                                                                                                                                                                                                                                                                                                                                         |
|-------------------------------|-----------------------------------------------------------------------------------------------------------------------------------------------------------------------------------------------------------------------------------------------------------------------------------------------------------------------------------------------------------------------------------------------------------------------------------------------------------------------------------------------------------------------------------------------------------------------------------------------------------------------------------------------------------------------------------------------------------------------------------------------------------------------------------------------------------------------------------------------------------------------------------------------------------------------------------------------------------------------------------------------------------------------------------------------------------------------------------------------------------------------------------------------------------------------------------------------------------------------------------------------------------------------------------------------------------------------------------------------------------------------------------------------------------------------------------------------------------------------------------------------------------------------------------------|
| Journal:                      | <i>BMJ Open</i>                                                                                                                                                                                                                                                                                                                                                                                                                                                                                                                                                                                                                                                                                                                                                                                                                                                                                                                                                                                                                                                                                                                                                                                                                                                                                                                                                                                                                                                                                                                         |
| Manuscript ID                 | bmjopen-2020-039089                                                                                                                                                                                                                                                                                                                                                                                                                                                                                                                                                                                                                                                                                                                                                                                                                                                                                                                                                                                                                                                                                                                                                                                                                                                                                                                                                                                                                                                                                                                     |
| Article Type:                 | Original research                                                                                                                                                                                                                                                                                                                                                                                                                                                                                                                                                                                                                                                                                                                                                                                                                                                                                                                                                                                                                                                                                                                                                                                                                                                                                                                                                                                                                                                                                                                       |
| Date Submitted by the Author: | 06-Apr-2020                                                                                                                                                                                                                                                                                                                                                                                                                                                                                                                                                                                                                                                                                                                                                                                                                                                                                                                                                                                                                                                                                                                                                                                                                                                                                                                                                                                                                                                                                                                             |
| Complete List of Authors:     | Hind, Daniel; The University of Sheffield, SchARR<br>Drabble, Sarah; The University of Sheffield, Medical Care Research Unit, School of Health and Related Research (SchARR)<br>Arden, Madelynne; Sheffield Hallam University, Centre for Behavioural Science and Applied Psychology<br>Mandefield, Laura; University of York, Health Sciences<br>Waterhouse, Simon; The University of Sheffield, CTRU<br>Maguire, Chin; University of Sheffield,<br>Cantrill, Hannah; The University of Sheffield, CTRU<br>Robinson, Louisa; The University of Sheffield<br>Beever, Daniel; The University of Sheffield, CTRU<br>Scott, Alex; The University of Sheffield, School of Health and Related Research<br>Keating, Sam; The University of Sheffield<br>Hutchings, Marlene; Sheffield Teaching Hospitals NHS Foundation Trust<br>Bradley, Judy; Queen's University Belfast, School of Medicine, Dentistry and Biomedical Sciences<br>Nightingale, Julia ; University Hospital Southampton NHS Foundation Trust<br>Allenby, Mark; University Hospital Southampton NHS Foundation Trust<br>Dewar, Jane; Nottingham University Hospitals NHS Trust<br>Whelan, Pauline; The University of Manchester, Health e-Research Centre<br>Ainsworth, John; The University of Manchester, Division of Informatics, Imaging & Data Sciences<br>Walters, Stephen; University of Sheffield, SchARR<br>O'Cathain, Alicia; University of Sheffield, School of Health and Related Research<br>Wildman, Martin; Sheffield Teaching Hospitals NHS Foundation Trust |
| Keywords:                     | Cystic fibrosis < THORACIC MEDICINE, Health informatics < BIOTECHNOLOGY & BIOINFORMATICS, Clinical trials < THERAPEUTICS, STATISTICS & RESEARCH METHODS, SOCIAL MEDICINE, Quality in health care < HEALTH SERVICES ADMINISTRATION & MANAGEMENT                                                                                                                                                                                                                                                                                                                                                                                                                                                                                                                                                                                                                                                                                                                                                                                                                                                                                                                                                                                                                                                                                                                                                                                                                                                                                          |
|                               |                                                                                                                                                                                                                                                                                                                                                                                                                                                                                                                                                                                                                                                                                                                                                                                                                                                                                                                                                                                                                                                                                                                                                                                                                                                                                                                                                                                                                                                                                                                                         |

1  
2  
3  
4  
5  
6  
7  
8  
9  
10  
11  
12  
13  
14  
15  
16  
17  
18  
19  
20  
21  
22  
23  
24  
25  
26  
27  
28  
29  
30  
31  
32  
33  
34  
35  
36  
37  
38  
39  
40  
41  
42  
43  
44  
45  
46  
47  
48  
49  
50  
51  
52  
53  
54  
55  
56  
57  
58  
59  
60

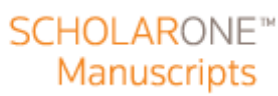

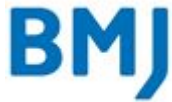

I, the Submitting Author has the right to grant and does grant on behalf of all authors of the Work (as defined in the below author licence), an exclusive licence and/or a non-exclusive licence for contributions from authors who are: i) UK Crown employees; ii) where BMJ has agreed a CC-BY licence shall apply, and/or iii) in accordance with the terms applicable for US Federal Government officers or employees acting as part of their official duties; on a worldwide, perpetual, irrevocable, royalty-free basis to BMJ Publishing Group Ltd ("BMJ") its licensees and where the relevant Journal is co-owned by BMJ to the co-owners of the Journal, to publish the Work in this journal and any other BMJ products and to exploit all rights, as set out in our [licence](#).

The Submitting Author accepts and understands that any supply made under these terms is made by BMJ to the Submitting Author unless you are acting as an employee on behalf of your employer or a postgraduate student of an affiliated institution which is paying any applicable article publishing charge ("APC") for Open Access articles. Where the Submitting Author wishes to make the Work available on an Open Access basis (and intends to pay the relevant APC), the terms of reuse of such Open Access shall be governed by a Creative Commons licence – details of these licences and which [Creative Commons](#) licence will apply to this Work are set out in our licence referred to above.

Other than as permitted in any relevant BMJ Author's Self Archiving Policies, I confirm this Work has not been accepted for publication elsewhere, is not being considered for publication elsewhere and does not duplicate material already published. I confirm all authors consent to publication of this Work and authorise the granting of this licence.



1  
2  
3  
4  
5  
6  
7  
8  
9  
10  
11  
12  
13  
14  
15  
16  
17  
18  
19  
20  
21  
22  
23  
24  
25  
26  
27  
28  
29  
30  
31  
32  
33  
34  
35  
36  
37  
38  
39  
40  
41  
42  
43  
44  
45  
46  
47  
48  
49  
50  
51  
52  
53  
54  
55  
56  
57  
58  
59  
60

# 1 Feasibility study for supporting medication adherence 2 for adults with cystic fibrosis: mixed-methods process 3 evaluation 4

5 Daniel Hind<sup>1§</sup>, Sarah J Drabble<sup>2</sup>, Madelynne A Arden<sup>3</sup>, Laura Mandefield<sup>4</sup>, Simon  
6 Waterhouse<sup>1</sup>, Chin Maguire<sup>1</sup>, Hannah Cantrill<sup>1</sup>, Louisa Robinson<sup>1</sup>, Daniel Beever<sup>1</sup>,  
7 Alexander J Scott<sup>1</sup>, Sam Keating<sup>1</sup>, Marlene Hutchings<sup>5</sup>, Judy Bradley<sup>6</sup>, Julia  
8 Nightingale<sup>7</sup>, Mark I Allenby<sup>7</sup>, Jane Dewar<sup>8</sup>, Pauline Whelan<sup>9</sup>, John Ainsworth<sup>9</sup>,  
9 Stephen J Walters<sup>2</sup>, Martin J Wildman<sup>2,5</sup>, Alicia O’Cathain<sup>2</sup>.

10  
11 <sup>1</sup>Clinical Trials Research Unit, University of Sheffield, Regent Court, 30 Regent  
12 Street, Sheffield, S1 4DA, UK

13 <sup>2</sup>School of Health and Related Research, Regent Court, 30 Regent Street, Sheffield,  
14 S1 4DA, UK

15 <sup>3</sup>Centre for Behavioural Science and Applied Psychology, Sheffield Hallam  
16 University, Collegiate Crescent, Sheffield, S10 2BQ

17 <sup>4</sup> Department of Health Sciences, University of York, University of York, Seebohm  
18 Rowntree Building, Heslington, York, YO10 5DD

19 <sup>5</sup> Sheffield Adult Cystic Fibrosis Unit Sheffield Teaching Hospitals NHS Foundation  
20 Trust, Northern General Hospital, Herries Road, Sheffield, S5 7AU

21 <sup>6</sup> Wellcome-Wolfson Institute For Experimental Medicine, School of Medicine,  
22 Dentistry and Biomedical Sciences, Queen’s University Belfast, UK..

23 <sup>7</sup> Wessex Adult Cystic Fibrosis Service, University Hospital Southampton NHS  
24 Foundation Trust, Tremona Road, Southampton, Hampshire, SO16 6YD.

25 <sup>8</sup> Wolfson Cystic Fibrosis Centre, Nottingham University Hospitals NHS Trust, City  
26 Hospital, Hucknall Road, Nottingham, NG5 1PB.

1  
2  
3 27 <sup>9</sup> Health eResearch Centre - Division of Imaging, Informatics and Data Sciences,  
4  
5 28 School of Health Sciences, Faculty of Biology, Medicine and Health, The University  
6  
7  
8 29 of Manchester, Manchester Academic Health Science Centre, Manchester, United  
9  
10 30 Kingdom

11  
12 31 §Corresponding author  
13  
14  
15 32

16  
17 33 Email addresses:

18  
19 34 DH: d.hind@sheffield.ac.uk

20  
21 35 SD: s.j.drabble@sheffield.ac.uk

22  
23 36 Madelynne A: M.Arden@shu.ac.uk

24  
25 37 LM: l.mandefield@sheffield.ac.uk

26  
27 38 SW: s.waterhouse@sheffield.ac.uk

28  
29 39 CM: c.maguire@sheffield.ac.uk

30  
31 40 HC: h.cantrill@sheffield.ac.uk

32  
33 41 LR: louisa.robinson@sheffield.ac.uk

34  
35 42 DB: d.a.beever@sheffield.ac.uk

36  
37 43 AS: alex.scott@sheffield.ac.uk

38  
39 44 SK: s.m.keating@sheffield.ac.uk

40  
41 45 MH: marlene.hutchings@sth.nhs.uk

42  
43 46 JB: judy.bradley@qub.ac.uk

44  
45 47 JN: julia.nightingale@uhs.nhs.uk

46  
47 48 Mark A: mark.allenby@uhs.nhs.uk

48  
49 49 JD: jane.dewar@nuh.nhs.uk

50  
51 50 PW: pauline.whelan@manchester.ac.uk

52  
53 51 JA: John.Ainsworth@manchester.ac.uk  
54  
55  
56  
57  
58  
59  
60

1  
2  
3  
4  
5  
6  
7  
8  
9  
10  
11  
12  
13  
14  
15  
16  
17  
18  
19  
20  
21  
22  
23  
24  
25  
26  
27  
28  
29  
30  
31  
32  
33  
34  
35  
36  
37  
38  
39  
40  
41  
42  
43  
44  
45  
46  
47  
48  
49  
50  
51  
52  
53  
54  
55  
56  
57  
58  
59  
60

52 SJW: s.j.walters@sheffield.ac.uk

53 AOC: a.ocathain@sheffield.ac.uk

54 MW: martin.wildman@sth.nhs.uk

For peer review only

## 56 **Abstract**

### 57 **Objectives**

58 To undertake a process evaluation of an adherence support intervention for people  
59 with cystic fibrosis (PWCF), to assess its feasibility and acceptability.

### 61 **Setting**

62 Two UK Cystic Fibrosis (CF) units

### 64 **Participants**

65 Fourteen adult PWCF; 3 professionals delivering adherence support  
66 ('interventionists'); 5 multi-disciplinary CF team members.

### 68 **Interventions**

69 Nebuliser with data recording and transfer capability, linked to a software platform,  
70 and strategies to support adherence to nebulised treatments facilitated by  
71 interventionists over five months (+/- one month).

### 73 **Primary and secondary measures**

74 Feasibility and acceptability of the intervention, assessed through semi-structured  
75 interviews, questionnaires, fidelity assessments, click analytics.

### 77 **Results**

78 Interventionists were complimentary about the intervention and training. Key barriers  
79 to intervention feasibility and acceptability were identified. Interventionists had  
80 difficulty finding clinic space and time in normal working hours to conduct review

1  
2  
3 81 visits. As a result, fewer than expected intervention visits were conducted and  
4  
5 82 interviews indicated this may explain low adherence in some intervention arm  
6  
7  
8 83 participants. Adherence levels appeared to be >100% for some patients, due to  
9  
10 84 inaccurate prescription data, particularly in patients with complex treatment regimens.  
11  
12 85 Flatlines in adherence data at the start of the study were linked to device connectivity  
13  
14 86 problems. Fidelity assessments identified that interventionists needed to focus more  
15  
16  
17 87 on the 'active ingredients' of the intervention during sessions.  
18  
19  
20  
21  
22

23 88

## 23 89 **Conclusions**

24 90 The process evaluation led to 14 key changes to intervention procedures to overcome  
25  
26 91 barriers to intervention success. With the identified changes, it is feasible and  
27  
28  
29 92 acceptable to support medication adherence with this intervention.  
30  
31  
32

33 93

34 94 Registration: ISRCTN13076797; 7<sup>th</sup> June 2016.  
35  
36  
37  
38  
39  
40

41 95

42 96

## 43 97 **Strengths and limitations of this study**

- 44 98
- 45 99 • This is a detailed evaluation of the feasibility of an adherence support system  
46  
47 100 for people with cystic fibrosis.
  - 48 101 • The use of mixed methods provided indepth understanding of the processes  
49  
50 102 involved in delivering the service, its value, and factors that might influence  
51  
52 103 its use, implementation and success.
  - 53  
54 104 • This was a small, two-centre study.
  - 55  
56  
57  
58  
59  
60

## 104 **Background**

105

106 Cystic Fibrosis (CF) is a long-term inherited condition affecting over 80,000 people  
107 worldwide, primarily of Northern European ancestry [1]. Median survival for people  
108 with CF (PWCF) is estimated at 31 years [2–6] with progressive lung function  
109 decline, caused by regular infection and damage to airways, being one of the main  
110 disease features [2].

111

112 Preventative medications preserve lung function and reduce exacerbations [7–  
113 13]. Low adherence to these medications is problematic as this predicts exacerbations  
114 requiring intravenous antibiotics (IVAB)[14,15]. Exacerbations of this nature carry a  
115 risk of systemic side effects of both increased mortality[16,17], and cost of care [18–  
116 20]. In 2012, the total spend on CF in the UK was estimated to be £100 million, with  
117 £30 million spent on inhaled antibiotics and mucolytics[21]; the UK CF population  
118 received 171,907 days of IVAB with 93,455 days received in hospital, costing an  
119 estimated £27 million[22].

120

121 Self-reported adherence to inhaled therapies underestimates objectively-measured  
122 adherence, with rates of 80% and 36% recorded, respectively[23] and systematic data  
123 collection suggests objective adherence to be closer to 30%[24]. As a result, clinicians  
124 are currently unable to identify PWCF with low adherence, in order to provide  
125 additional support.

126

127 Consistent with identified research priorities[25,26], a complex intervention was  
128 developed [Cite companion paper] to support inhaled medication adherence in PWCF.  
129 This article presents the results of a process evaluation that was undertaken alongside

1  
2  
3 130 a pilot RCT, and describes the resultant changes made to intervention procedures

4  
5 131 prior to a full-scale RCT[27,28]. The specific objectives of the process evaluation

6  
7  
8 132 were:

9  
10 133

11  
12 134 1. To triangulate qualitative and quantitative data collected on intervention  
13  
14 135 inputs, engagement, activities, and contextual factors, alongside immediate and  
15  
16 136 intermediate outcomes recorded in the feasibility study, to understand and identify  
17  
18 137 potential barriers to intervention implementation and success.

19  
20  
21 138 2. To document and use these findings to guide changes to intervention  
22  
23 139 procedures, ahead of a future, full-scale RCT.

## 24 25 26 27 140 **Methods**

### 28 29 141 ***The wider feasibility study***

30 142 The process evaluation forms one part of a wider pilot study, which also assessed the  
31  
32 143 feasibility of RCT procedures (reported elsewhere[29]). The pilot RCT consisted of  
33  
34 144 33 intervention patients and 31 control patients. Three trained interventionists in two  
35  
36 145 UK CF centres delivered the intervention to PWCF in the intervention arm and  
37  
38 146 followed them up for 5 months, plus or minus one month.

### 39 40 41 147 ***Intervention description***

42 148 The complex intervention to support adherence in CF was developed to enable PWCF  
43  
44 149 to manage adherence to nebulised medication, with a view to shifting CF treatment  
45  
46 150 from rescue in hospital settings to prevention, managed in the community. The full  
47  
48 151 intervention development process is described in a separate article[29].

49  
50  
51  
52 152

53  
54 153 The complex intervention consists of four key elements: the eTrack, CFHealthHub  
55  
56 154 server, the CFHealthHub Apps and the manualised behavioural intervention. A logic  
57  
58 155 model (Figure 1) was produced to reflect, in detail, constructs and processes by which  
59  
60

1  
2  
3 156 the intervention was expected to function; this is in terms of inputs, engagement,  
4  
5 157 activities, and outcomes. The logic model's hashed numbers (#1, #2, etc) provide a  
6  
7  
8 158 reference for linking intervention materials and processes to logic model constructs in  
9  
10 159 Figure 1.

11  
12 160

13  
14 161 The eTrack (#4) (PARI Pharma GmbH, Starnberg, Germany) is a microchipped  
15  
16 162 nebuliser, enabling real-time monitoring of adherence to nebulised medications.  
17  
18 163 Timestamped records of medications administered via the eTrack are sent to a 2net  
19  
20 164 Hub (Qualcomm, San Diego, USA; #5) which transmits data to PARI.

21  
22 165

23  
24 166 Real-time inhalation data is received by the CFHealthHub (CFHH) server  
25  
26 167 infrastructure, stored securely and used for display in both a web-based interface and  
27  
28 168 a mobile app (#6, see Figure 2). Each of these displays adherence data alongside  
29  
30 169 tools to support behaviour change and educational content.

31  
32 170

33  
34 171 Participants and their interventionists had access to adherence displays for monitoring  
35  
36 172 (#13, #19, #20) and other CFHH content (#21- #26), such as education about  
37  
38 173 treatments (#21) and problem solving in the face of adherence barriers (#26).

39  
40 174 Interventionists would use CFHH to facilitate delivery of manualised behavioural  
41  
42 175 intervention sessions (#8, #17).

43  
44 176

45  
46 177 Health professionals (n =3) included a clinical psychologist, a physiotherapist and a  
47  
48 178 social worker. They received specific training to deliver the manualised intervention  
49  
50 179 sessions (#9). Training was delivered over two days, in face-to-face workshops. This  
51  
52 180 was supplemented by online learning modules and a further four-week training  
53  
54  
55  
56  
57  
58  
59  
60



1  
2  
3 181 schedule. Interventionists were assessed with online theory tests and in a competency  
4  
5 182 assessment which examined intervention delivery within the first 5 sessions.  
6  
7  
8 183  
9  
10 184 Sessions were delivered either face-to-face or remotely, on a one-to-one basis. All  
11  
12 185 intervention arm participants received an initial intervention visit and a minimum of  
13  
14 186 one additional review visit over the period of the study (#18). The content of sessions  
15  
16 187 varied by participant reported motivation; sessions for those with low motivation were  
17  
18 188 tailored to promote relationship / confidence building and to support the participant in  
19  
20 189 the exploration of relevant CFHealthHub educational and information material (#21,  
21  
22 190 #22). Relevant material could be added to the participant's personalised 'Toolkit'.  
23  
24 191 Sessions conducted with participants displaying higher motivation would also involve  
25  
26 192 supporting the participant to set personalised adherence goals (#23, #24), and to make  
27  
28 193 action plans (#25) and engage in problem-solving including making coping plans  
29  
30 194 where relevant (#26).  
31  
32  
33  
34  
35  
36  
37  
38 196 **Design**  
39 197 A mixed-methods approach was used for the process evaluation. Although this  
40  
41 198 pragmatic case study[30,31] primarily works at the level of the programme, we also  
42  
43 199 present a nested multiple-case design, with cases at the level of the PWCF, and two  
44  
45 200 embedded units of analysis – interviews with intervention participants and trial data.  
46  
47  
48 201

### 202 **Data Sources**

51 203 Quantitative and qualitative data sources were triangulated to address process  
52  
53 204 evaluation objectives. These are described using hashed numbers to relate data  
54  
55 205 sources to aspects of the logic model (Figure1) for which they contributed data.  
56  
57  
58 206

1  
2  
3 207 Qualitative data included: verbal reports from project staff (#1, #2, #10, #16); semi-  
4  
5 208 structured interviews with interventionists and participants in the intervention and  
6  
7 209 control arms of the pilot RCT (#8, #9, #12, #13, #14, #15, #16, #17, #19, #20, #21);  
8  
9 210 minutes of meetings (#3); emails (#4), website development reports (#6); and fidelity  
10  
11 211 assessments (#17).  
12  
13  
14  
15  
16

17 213 Quantitative data included: implementation log entries and data management reports  
18  
19 214 (#3), questionnaire data derived from secondary clinical outcome measures described  
20  
21 215 in Table 1 (#7, #28, #29, #30, #31, #32, #33) an interventionist-completed structured  
22  
23 216 questionnaire on interventionist confidence post-training (#9), structured  
24  
25 217 interventionist fidelity assessments in which audio-recordings of intervention sessions  
26  
27 218 were coded using a fidelity scoring system which assessed whether each component  
28  
29 219 of the intervention was delivered and the quality of that delivery (#11, #17), CFHH  
30  
31 220 click analytics (#13, #14, #15, #18, #20, #21, #22, #23, #24, #25, #26), session  
32  
33 221 frequency and duration records (#15); and adherence data taken from CFHH (#35).  
34  
35 222 These 23 logic model constructs were collected as part of the trial protocol from  
36  
37 223 sources described in Table 1.  
38  
39  
40  
41

42 224 Semi-structured interviews, conducted face-to-face, were digitally audio-recorded and  
43  
44 225 transcribed verbatim. The median length of interviews was 30 minutes (range 11 to  
45  
46 226 87) for PWCF, 86 minutes (63 to 102) for interventionists and 62 minutes (51 to 66)  
47  
48 227 for CF team members.  
49  
50  
51

52 228

### 53 229 **Sampling**

54 230 Participants were recruited for semi-structured interviews. Participants included  
55  
56 231 intervention arm participants (n=14), interventionists (n=3, 0.8 WTE at each centre)  
57  
58 232 and members of the wider, multi-disciplinary CF team (n=5). Participants were  
59  
60

1  
2  
3 233 purposively sampled based on site, age, gender, deprivation index, objective and  
4  
5 234 subjective adherence levels (service-users), or site and professional category  
6  
7  
8 235 (professionals). Interventionists were interviewed twice – at the beginning and end of  
9  
10 236 the study – patients once. PWCF who consented to be approached for interview were  
11  
12 237 contacted by letter or email and, subsequently, telephone or email depending on  
13  
14 238 preference. Professionals were contacted directly by the study team.  
15  
16

17 239

18 240

### 21 241 **Data Analysis**

22 242 We conducted a Framework analysis of interview transcripts[32], within NVivo (QSR  
23  
24 243 International) using multiple frameworks including the Theoretical Domains  
25  
26 244 Framework[33], a process evaluation framework[34], and the logic model (Figure 1).  
27  
28 245  
29  
30 246 Using a modified triangulation protocol[35], we integrated qualitative and quantitative  
31  
32 247 datasets at the programme- and the case-level[36]. We used a joint display table[37]  
33  
34 248 to summarise data sets for 35 logic model constructs in the Inputs (n=12),  
35  
36 249 Engagement (n=6), Activities (n=7), Immediate outcomes (n=6) and Intermediate  
37  
38 250 outcomes (n=2) columns (Figure 1). The fit of data integration was categorised as:  
39  
40 251 ‘confirmation’ (quantitative and qualitative data provided similar findings);  
41  
42 252 ‘expansion’ (the datasets addressed different or complementary aspects of the  
43  
44 253 phenomenon); or, ‘discordance’ (the datasets were contradictory)[38]. We described  
45  
46 254 similar and unique contributions , made by the two data sets, to the research question  
47  
48 255 [35].  
49  
50 256

51  
52 257 In the 14 intervention participants, for whom both qualitative and quantitative process  
53  
54 258 data was available, we produced case-profiles[39], triangulating qualitative data with  
55  
56  
57  
58  
59  
60

1  
2  
3 259 individual-participant adherence run charts[40] (Additional File 01) and other  
4  
5 260 quantitative process data (see Additional File 02 – Study protocol, pp29-31). We  
6  
7 261 worked abductively, moving between behaviour change theories[41,42] and  
8  
9 262 contextual observations, agreeing plausible hypotheses to explain patterns which  
10  
11 263 could be tested in future work [43–46].  
12  
13  
14  
15 264

16  
17 265 We produced a case-ordered descriptive matrix[47], with cases ranked by average  
18  
19 266 adherence during the last month of the study, to understand how processes and  
20  
21 267 outcomes were mediated by local and individual conditions. Adherence levels of  
22  
23 268 >80% were assessed as high; 50-80% moderate; <50% low [14,48]. We theorised that  
24  
25 269 high life chaos, as measured by the Confusion, Hubbub and Order Scale  
26  
27 270 (CHAOS)[49] and low motivation would be associated with low adherence. We used  
28  
29 271 four measures to understand motivation: (1) a single item, scored on a 1-7 Likert scale  
30  
31 272 – “I want to do all of my nebuliser treatment” (motivation); (2) a single item, scored  
32  
33 273 on a 1-7 Likert scale, which asked, “I am confident I can do all of my nebuliser  
34  
35 274 treatments” (‘confidence’); (3) the necessities and, (4) concerns five-point subscales  
36  
37 275 of the Beliefs about Medicines Questionnaire nebuliser-specific (BMQ) instrument  
38  
39 276 [50]. Interventionists assessed the participant’s motivation to increase adherence on a  
40  
41 277 one to seven scale after discussion with the patient; adequate motivation was  
42  
43 278 necessary before participants could make action plans and do problem solving  
44  
45 279 activities.  
46  
47  
48  
49  
50

51 280

### 54 281 ***Approach taken to modifying the intervention***

55 282 Modifications to the intervention fell into three categories: the software platform;  
56  
57 283 other IT infrastructure; and the manual and training. Identified problems and solutions  
58  
59 284 were tabulated following a modified approach of that taken by Bugge [28]. Digital  
60

1  
2  
3 285 platform development was reviewed regularly using the “Must have, Should have,  
4  
5 286 Could have, and Won't have but would like” (MoSCoW)[27], often used in agile  
6  
7 287 software development [51,52].  
8  
9

10 288

### 12 289 ***Patient and Public Involvement***

13 290 Recruitment for the Patient and Public Involvement (PPI) Group was achieved by  
14  
15 291 advertising within CF units and on the People in Research website, as well as via  
16  
17 292 group members themselves. Cross-infection between PWCF[53] was prevented by  
18  
19 293 arranging meetings via teleconference. The PPI group gave feedback on intervention  
20  
21 294 data-sharing policies, usability and presentation of the website/user-guide. In addition,  
22  
23 295 the PPI group piloted the participant information materials and one individual gave  
24  
25 296 feedback on the trial protocol and interview guides (Additional File 02).  
26  
27  
28  
29

30 297

### 32 298 ***Ethical approval***

33 299 The study received approval from London Brent Research Ethics Committee  
34  
35 300 (16/LO/0356). The funder was not involved in the trial design, patient recruitment,  
36  
37 301 data collection, analysis, interpretation, or presentation, writing or editing of the  
38  
39 302 report, or the decision to submit for publication. The corresponding author had full  
40  
41 303 access to all the data in the study and had final responsibility for the decision to  
42  
43 304 submit for publication.  
44  
45  
46  
47  
48  
49

50 305

## 51 306 **Results**

52 307 In what follows, we address contextual factors that affected implementation and  
53  
54 308 participant responses, then follow the columns (inputs, engagement, activities,  
55  
56 309 immediate and intermediate outcomes) of the logic model. Additional File 03  
57  
58 310 summarises quantitative process outcomes for 14 case study participants, ranked by  
59  
60

1  
2  
3 311 objective adherence at the end of the trial. Hashed numbers (#1, #2, etc) indicate cross  
4  
5 312 references to the logic model (Figure 1) and supporting evidence in Additional File  
6  
7 313 04, which summarises data triangulation at the level of individual logic model  
8  
9 314 constructs. Both qualitative and quantitative data were available for 13/34 logic model  
10  
11 315 constructs, providing confirmation of (n=2) or expansion on (n=11) inferences drawn  
12  
13 316 from quantitative data. A case-ordered descriptive matrix based on logic model  
14  
15 317 columns (Additional File 05) and run charts annotated with key events (Additional  
16  
17 318 File 01) provides an integrated analysis at the level of the participant for fourteen  
18  
19 319 'case studies', cross referenced by participant numbers (R02/52, R01/54, etc).  
20  
21  
22  
23  
24  
25  
26

## 27 321 **Contextual factors affecting implementation and participant** 28 322 **responses**

29 323 The key factor affecting implementation was the mixed economy of CF drug delivery  
30  
31 324 systems: the e-Flow (PARI Pharma GmbH, Starnberg, Germany); the iNeb (Philips  
32  
33 325 Healthcare, Eindhoven, Netherlands); and a number of dry powder delivery systems.  
34  
35 326 The e-Flow is the only device able to deliver all the wet nebulised drugs that are used  
36  
37 327 in CF care. The e-Track we used in this trial was a version of the e-Flow developed to  
38  
39 328 transfer time- and date-stamped data. Most patients at site R01 used e-Flows;  
40  
41 329 switching consenting participants over to the e-Track was generally unproblematic.  
42  
43 330 The e-Flow's competitor, the iNeb, cannot deliver aztreonam and requires double  
44  
45 331 chamber filling to deliver tobramycin, so it is not suitable for all patients. The data  
46  
47 332 transfer version of the iNeb, the BiNeb, is a prototype for which limited numbers are  
48  
49 333 available. We were unable to secure approval to integrate the BiNeb into CFHH in  
50  
51 334 time to incorporate it into this study. At site R02 where iNeb were commonly used,  
52  
53 335 those who were familiar with and liked the iNeb were less keen to swap to an  
54  
55 336 alternative device; some who swapped to the e-Track, later wanted to move back to  
56  
57  
58  
59  
60

1  
2  
3 337 the iNeb. A minority of patients use dry powder delivery systems, none of which have  
4  
5 338 data transfer versions. We were unsuccessful in engaging any of the companies  
6  
7  
8 339 producing dry powders in time to get dry powder systems integrated into CFHH,  
9  
10 340 meaning that dry powder users could not be recruited to this feasibility study. Making  
11  
12 341 nebulisers with data recording and transfer capability available within hospitals  
13  
14 342 following local delivery took prolonged engagement with medical engineering  
15  
16  
17 343 departments to obtain local safety approvals. For more than one participant, the  
18  
19 344 strength of their mobile data signal affected 2net Hub connectivity with the central  
20  
21 345 server (Implementation log, 19 Oct 16).  
22  
23

24 346

25  
26 347 Through meetings with site staff, the team identified a range of human factors that  
27  
28 348 also affected implementation. The struggle for clinic space and patient convenience  
29  
30 349 resulted in more home visits than anticipated for consent and review meetings,  
31  
32 350 informed by local lone-working policies. Reorganisation of one CF Centre, involving  
33  
34 351 the transfer of patients from the care of one local hospital to another, had created  
35  
36 352 discontent among some patients involved in the trial.  
37  
38  
39

40 353

41 354

### 42 355 **Inputs**

43  
44  
45 356 The study chief investigator reported introducing local site investigators, centre  
46  
47 357 directors and MDTs to CFHH (#1). Through case reports, he conveyed that relying on  
48  
49 358 FEV<sub>1</sub>, symptoms and BMI for CF management alone is inadequate and that objective  
50  
51 359 adherence data could help overcome the ‘lamppost syndrome’[54], also known as the  
52  
53 360 ‘streetlight effect’[55,56] or ‘drunkard’s search’(page 11[57]) – a type of availability  
54  
55 361 bias[58]. The chief investigator reported feeling that site investigators at both centres  
56  
57  
58  
59  
60

1  
2  
3 362 were fully bought in, but that one clinician (not an investigator) believed that the  
4  
5 363 disparities between subjective and objective adherence[23] were overstated (#2).  
6  
7  
8 364  
9  
10 365 Interventionists entered prescription data into CFHH based on patient records and  
11  
12 366 self-reported treatment regimen (#3). Occasionally, interventionists were slow to  
13  
14 367 make monthly prescription checks when prompted by system alerts, resulting in  
15  
16 368 apparent adherence levels of over 100%, traced to the use of alternating treatment  
17  
18 369 regimens[59] (Implementation Log, 01 Dec 16, TMG minutes 10 Jan 17). Nebulisers  
19  
20 370 with data recording and transfer capability (#4), 2net Hubs (#5), the CFHH website  
21  
22 371 and mobile application (#6), were made available (emails to project manager 20 May  
23  
24 372 16, 23 Jun 16). The Capability Opportunity Motivation -Beliefs about Medicines  
25  
26 373 Questionnaire (COM-BMQ – see Additional File 02)[50] questionnaire data (#7) was  
27  
28 374 collected in CFHH (Additional File 06 - Table 8).  
29  
30  
31 375  
32  
33 376 Interventionists were complimentary about the intervention manual (#8) and highly  
34  
35 377 satisfied with training, but suggested that future courses involved a case study  
36  
37 378 approach, following a patient through the intervention to illustrate its different aspects  
38  
39 379 (#9) (Additional File 04). A member of the research team (MH) acted as an  
40  
41 380 intervention mentor to interventionists (#10). Interviews (SD) and observations (MH,  
42  
43 381 HC) identified differences in the way site investigators interacted with  
44  
45 382 interventionists, with one giving more intensive practical support, through weekly  
46  
47 383 meetings and problem-solving (not prescribed by the intervention), than the other.  
48  
49 384 Fidelity data was collected on all three interventionists and the fidelity assessment  
50  
51 385 instrument was modified before use in the full RCT (#11). During interviews,  
52  
53 386 interventionists were enthusiastic about intervention processes (#12). As sites  
54  
55  
56  
57  
58  
59  
60



1  
2  
3 387 struggled to find space or time for consent / intervention encounters in clinic, the  
4  
5 388 study team requested an increase in the number of home visits (Implementation log 19  
6  
7 389 Oct 2016). As a result of initial problems in contacting participants and the need for  
8  
9 390 flexibility in arranging meetings out of usual clinic hours, the study team requested  
10  
11 391 flexible working in which the team worked 12:00-20:00 two days a week (interviews  
12  
13 & TMG minutes 29 Nov 2016).  
14  
15 392  
16  
17 393

## 394 **Engagement**

395 Interviews and click analytics showed that MDT members did not access adherence  
396 data (#13), aside from in the form of bar charts brought to MDT meetings by  
397 interventionists. It is important to note that extending the use of CFHH to the MDT  
398 was not an objective of the trial and no training was given in this regard. Click  
399 analytics showed that interventionists tracked adherence (#14). Of 14 case study  
400 participants, three did not contribute complete adherence data: R02/42 and R02/02  
401 withdrew, while R02/03 was lost to follow-up. In other participants, flatlines in  
402 adherence data caused concern (Additional File 01). Flatlines at the beginning of the  
403 study (e.g. R01/39, R01/48) indicated technical problems with pairing nebulisers and  
404 hubs. Flatlines at the end of the study period (e.g. R01/42, R01/44, R02/12) were  
405 confirmed as the genuine recording of non-adherence through the use of adherence  
406 data beyond the end of the study period, interview data, self-report subjective  
407 adherence and the MAD-3 (Additional File 03 – Table f).

408  
409 Click analytics showed the median number of participant CFHH sessions was three  
410 (#15) (Additional File 03 – Table c). Of those with low usage, initial technical  
411 problems (R01/02, R01/48) and initial lack of availability of a mobile application (#6)

1  
2  
3 412 were potential contributing factors. Some case study participants showed moderate  
4  
5 413 (R02/52, R01/54 and R01/40: 9-13 sessions) or high use (R02/12 and R01/42: >40  
6  
7 414 sessions). Push notifications - user-defined messages from the server which give  
8  
9 415 participants congratulations or reminders about adherence behaviour – were not  
10  
11 416 available in the pilot trial (#16).  
12  
13  
14  
15 417

16  
17 418 Based on fidelity assessment of intervention session recordings, the *content* fidelity of  
18  
19 419 face-to-face interactions, was excellent (100%) – with all aspects delivered as per the  
20  
21 420 manual (#17). Delivery *quality* fidelity was more variable (60-92%). The generation  
22  
23 421 of goals and action plans was sometimes too directive rather than negotiated and  
24  
25 422 supportive. Interviews demonstrated that assessing the true level of motivation to  
26  
27 423 adhere to treatment was challenging; sometimes those with insufficient intrinsic  
28  
29 424 motivation (e.g. R01/48, R01/54 and R02/03) were assessed as having sufficient  
30  
31 425 motivation and inappropriately tasked with setting and reviewing goals, making  
32  
33 426 action plans and problem solving (see below #23-26). These individuals were variably  
34  
35 427 motivated by wanting to prove themselves to MDT members, who had doubted their  
36  
37 428 adherence (R01/49 and R01/54, Additional File 05), or by helping the research:  
38  
39  
40  
41  
42  
43  
44

45 430 *“I made that special effort ‘cause I was taking part in this trial... I didn’t see*  
46  
47 431 *how it was going to make me better” (R01/48).*  
48

49 432  
50  
51 433 Interaction with these individuals should have been confined to relationship-building  
52  
53 434 and trust-building. Fidelity assessment of recordings identified that, in interactions  
54  
55 435 with the adequately motivated, the focus was not always on the most active  
56  
57 436 ingredients – goal-setting, action planning (habit formation) and problem-  
58  
59  
60

1  
2  
3 437 solving/coping planning. Participant run charts (Additional File 01) revealed a  
4  
5 438 disparity in whether and when review visits happened (#18).  
6  
7  
8 439

9  
10  
11 **Activities**

12 441 In interviews, CF team clinicians (as distinct from the interventionists) confirmed they  
13  
14 442 were not monitoring adherence as part of usual care (#19). Participant R01/02  
15  
16 443 complained that the research focus on adherence was “*parallel rather than*  
17  
18 444 *integrated*” with mainstream clinical management. However the intervention was  
19  
20 445 designed to be interventionist delivered allowing individual randomisation in a system  
21  
22 446 without contamination of controls rather than an intervention aimed at achieving  
23  
24 447 system change which would have required a cluster trial design. Participants’ clicks  
25  
26 448 (median 11) on the CFHH “How am I doing?” (run charts) page sometimes related to  
27  
28 449 a limited number of sessions. In interviews, one moderately frequent user (R01/54)  
29  
30 450 only accessed this page to check their data was uploading. Other moderate/frequent  
31  
32 451 users described this page as important for adherence self- monitoring (#20), even  
33  
34 452 when their grasp of their own adherence was poor (R01/49).  
35  
36  
37  
38  
39  
40  
41

42 454 In interviews with participants, for tailored education about treatment (#21),  
43  
44 455 participants accessed particular education pages for specific issues, such as nebuliser  
45  
46 456 malfunction, which was viewed as, “more down to earth” than technical manuals. In  
47  
48 457 particular a video about the treatment action of Dornase alfa, was often praised, as a  
49  
50 458 means of educating others about CF; ‘Talking heads’ videos (in these videos people  
51  
52 459 with CF described strategies for successful nebuliser use) (#22) divided opinion: for  
53  
54 460 some, the opportunity for social comparison[60] provided relief and reassurance;  
55  
56 461 those who were less appreciative were those who found comparisons with people  
57  
58  
59  
60

1  
2  
3 462 healthier than themselves could make them feel as though they were not doing well  
4  
5 463 and comparisons with those less healthy could make them fearful of the future.  
6  
7  
8 464  
9  
10 465 Other activities (#23 to #26 on the logic model) required participants to have adequate  
11  
12 466 levels of motivation. Interventionists classified all but one case study participant  
13  
14 467 (R01/44) as having adequate motivation (Additional File 03, Table b) and therefore  
15  
16 468 eligible for further tailored intervention. But, as detailed above (see #17 in the  
17  
18 469 engagement section), this was sometimes based on inadequate discussion with the  
19  
20 470 participants. In interviews, participants generally reported setting goals (#23), but  
21  
22 471 fidelity assessment showed that goals were sometimes formulated by interventionists  
23  
24 472 rather than by participants (see #17). The mean number of review sessions (#24) over  
25  
26 473 five months was 1 (Additional File 03 – Table e); this was fewer than intended, likely  
27  
28 474 reflecting a failure of the study team to set appropriate expectations and a lack of time  
29  
30 475 created by the high pace of recruitment (problem log entries: 31-Jan-17; 13-Feb-17).  
31  
32 476 Two individuals (R01/39 and R01/40) received their first face-to-face session with an  
33  
34 477 interventionist over halfway through the study period (Additional File 01). CFHH  
35  
36 478 action plan (#25), problem solving and coping plan (#26) pages were accessed a  
37  
38 479 median of two, three and one times, respectively (Additional File 03 – Table e).  
39  
40 480 Interviews data suggests action / coping plans were completed during intervention  
41  
42 481 visits but not accessed by participants otherwise. In interviews, some participants said  
43  
44 482 they were reassured by the presence of, and sometimes reported insights from,  
45  
46 483 problem-solving modules, such as what to do when going on holiday. However, the  
47  
48 484 use of action plans was disliked by some participants who found writing down the  
49  
50 485 action plans like “*going back to school*”. This dislike at least partly reflected the  
51  
52  
53  
54  
55  
56  
57  
58  
59  
60

1  
2  
3 486 generation of action and coping plans by interventionists rather than by the  
4  
5 487 participants themselves (see #17).  
6  
7  
8 488

### 11 489 **Immediate outcomes**

12 490 The pilot was not designed to disseminate the intervention across the centre and with  
13  
14 491 minimal monitoring by professionals within the wider CF team (see #19) routine  
15  
16 492 medical care was not informed by adherence (#27). Unsurprisingly, given the lower  
17  
18 493 than expected face-to-face contact (#18, #24), intervention arm group averages for  
19  
20 494 immediate (process) outcomes (#28-33) changed little over five months, with the  
21  
22 495 exception that there was a mean reduction of 1.84 (SD 3.44) barriers to adherence per  
23  
24 496 person (#33), which could be the outcome of problem solving and education about  
25  
26 497 treatment processes (Additional file 03 – Table f). Frequent use of CFHH and self-  
27  
28 498 monitoring in particular (see above, #20) did not necessarily mean that self-reported  
29  
30 499 subjective adherence and electronically-captured objective adherence were well  
31  
32 500 aligned (#28) (Additional file 03 – Tables f and g). A *post hoc* paired comparison of  
33  
34 501 subjective and objective adherence at 5 (+/-1) months (Figure 3) suggests that higher  
35  
36 502 adherers were more uniformly accurate in their understanding of their own adherence,  
37  
38 503 whereas low adherers could be overly optimistic.  
39  
40  
41  
42  
43  
44  
45 504

### 48 505 **Intermediate outcomes**

49 506 Item #34 of the logic model, treatment optimisation, is defined by NICE as, “a  
50  
51 507 person-centred approach to safe and effective medicines use” to ensure best  
52  
53 508 outcomes[61]. Treatment optimisation is a service-level objective, which was beyond  
54  
55 509 the scope of our patient-focused intervention but is the subject of related ongoing  
56  
57 510 research (see Discussion). During interviews, RCT participants in the intervention  
58  
59  
60

1  
2  
3 511 arm described behaviours that would affect treatment optimisation, for instance taking  
4  
5 512 holidays from their treatment. Levels of CF treatment adherence (#35) were 10%  
6  
7 513 (95% CI: -5.2 to 25.2) higher in the intervention arm (Additional File 06, Table 17).  
8  
9  
10 514 We developed a number of theories about why some intervention patients did or did  
11  
12 515 not increase their adherence (#35) during the analysis. In some cases the run charts  
13  
14 516 illustrated, in line with Control Theory, the goal-directed nature of behaviour and how  
15  
16  
17 517 it is regulated by feedback control processes[62]. For example, R01/39 and R01/49  
18  
19 518 seemed to show improvement shortly before planned face-to-face visits from  
20  
21 519 interventionists (Additional File 01). R01/39, who seemed intrinsically motivated  
22  
23 520 when interviewed, sustained improvement in adherence beyond the trial period  
24  
25  
26 521 through what they described as positive interaction with the interventionist. Others,  
27  
28 522 who seemed more extrinsically motivated in interviews (R01/49, R01/54, R01/48: see  
29  
30 523 #17), did not sustain adherence, with charts suggesting an effortful, ‘all-or-nothing’  
31  
32 524 pattern. At baseline, R02/07 had no well-established routine (CHAOS score of 10:  
33  
34 525 Additional File 01), implying substantial self-regulatory effort to achieve higher  
35  
36 526 adherence. In their interview, this participant reported finding habit formation parts,  
37  
38 527 such as goal-setting, helpful which may have enabled him to maintain high adherence  
39  
40 528 with reduced effort, as measured by increased habit and reduced life chaos and  
41  
42 529 barriers (change scores -5 and -3 respectively: Additional File 03 - Table f). Finally, it  
43  
44 530 is important to understand that individual-level adherence can be unstable over time  
45  
46 531 (Additional File 01, see especially, R01/54, R01/48) highlighting the problem of  
47  
48 532 assessing adherence as a ‘snapshot’ in a pre-/post-test analysis, rather than in a  
49  
50 533 continuous assessment over time.  
51  
52  
53  
54  
55  
56 534

1  
2  
3 535 Several participants with low baseline adherence appeared to have responded well to  
4  
5 536 the intervention. R01/40 had high motivation (Additional File 03 – Table b;  
6  
7 537 Additional File 01), possibly due to the salience of a recent hospitalisation for IVAB  
8  
9 538 treatment of an exacerbation. Click analytic data showed high engagement, with  
10  
11 539 independent access of the website and use of problem-solving tools. However in other  
12  
13 540 patients, case study run charts (Additional File 01) showed that measuring change in  
14  
15 541 average objective adherence between baseline and five months sometimes masked  
16  
17 542 periods of success in between (e.g. R01/02, and R02/12). Without looking at  
18  
19 543 adherence graphs, and only measuring objective adherence at baseline and five  
20  
21 544 months, this would have been missed (see Discussion). Interview data offered some  
22  
23 545 reasons for improved adherence. While R01/49 had not made an action plan and their  
24  
25 546 subjective adherence was optimistic (Additional file 03 – Table f), their objective  
26  
27 547 adherence increased from low to moderate over the trial period (Additional File 01);  
28  
29 548 their motivation also increased and self-reported barriers decreased (Additional file 03  
30  
31 549 – Table f), potentially through their high use of problem-solving modules and self-  
32  
33 550 monitoring (Additional File 03, Table d). R01/02's run chart also showed a period of  
34  
35 551 improvement, ending after the last review visit (Additional File 01); nonetheless,  
36  
37 552 reduced life chaos (Additional file 03 – Table f) and interview data suggested an  
38  
39 553 established routine and reduced barriers associated with intensive face-to-face  
40  
41 554 therapist interaction and action/coping plans (Additional File 03, Table d). The tailing  
42  
43 555 off of adherence after the end of the trial in some case study participants may indicate  
44  
45 556 that adherence remained effortful or participation in the trial was motivated by  
46  
47 557 altruism not help-seeking (see quotation from R01/48, above).  
48  
49  
50  
51  
52  
53  
54  
55  
56  
57  
58  
59  
60

## 559 **Modifications to the intervention**

560 Additional file 07 documents 14 technical changes that will be made for the full-scale  
561 RCT, based on the process evaluation findings, to CFHH (n=5), IT infrastructure  
562 (n=1) and to the interventionist training, manual and procedures (n=8). To prevent  
563 adherence data flatlines, nebulisers (#4) and 2net Hubs (#5) will be paired at the  
564 factory. Three changes to CFHH (#6) will make it easier for interventionists to  
565 view/edit prescription data and to handle alternating treatment regimens (#3). Other  
566 changes to CFHH will include making graphs more easily interpretable and, based on  
567 interview data and PPI feedback, adding descriptions to videos. Changes to the  
568 interventionist manual (#8) will increase the emphasis on ‘active ingredients’,  
569 introduce intervention triggers for reduced adherence or exacerbations and introduce  
570 new habit formation sessions. The need for increased numbers of protocolised  
571 intervention review sessions arose because, in the feasibility study, a focus on RCT  
572 recruitment targets gave interventionists inadequate time to deliver review visits (#18,  
573 #24), critical for updating personalised action plans (#25) and updating coping plans  
574 (#26). Training (#9) in the full-scale trial will be delivered as an intensive one-week  
575 course, with more explicit focus on intervention fidelity, supported by new case study  
576 data and role plays to ensure baseline competency (#17).

577

## 578 **Discussion**

579 The process evaluation identified elements of the intervention which could be  
580 improved and 14 changes were documented. The complex intervention was developed  
581 using mixed methods research with an inter-disciplinary, person-centred and iterative  
582 approach[63–69]. The mere usage of a digital behaviour change intervention may not  
583 indicate engagement or lead to desired outcomes[63,68,70–73]; there is no simple



1  
2  
3 584 dose-response relationship[74]. In fact, for those with low motivation and low  
4  
5 585 confidence, evidence of non-adherence can be threatening[75]. With different  
6  
7 586 baseline motivation and life chaos, a population-level definition of “effective  
8  
9 587 engagement”[65] may be infeasible, but contextual and motivational data may still  
10  
11 588 explain patterns observed in run charts[76]. What may matter more than defining  
12  
13 589 engagement is the correct assessment and tailoring of management to different  
14  
15 590 psychosocial barriers[64,77–85]. Our study suggests that digital systems cannot  
16  
17 591 replace, only complement, face-to-face interaction between health professionals and  
18  
19 592 patients[86–88], potentially creating a sense of ‘accountability’ consistent with  
20  
21 593 control theory[42,89]. However, it is important to recognise that in the absence of  
22  
23 594 objective adherence data clinicians and patients will find it difficult to even begin to  
24  
25 595 engage with behaviour change.  
26  
27  
28  
29

30 596  
31  
32 597 Our use of objective adherence measurement overcomes the limitations of previous  
33  
34 598 studies[90] and confirms that subjective and objective adherence are poorly  
35  
36 599 aligned[23]. This process evaluation has succeeded in demonstrating that delivery of  
37  
38 600 this intervention is possible in busy clinical settings; participant uptake was high and,  
39  
40 601 with further development on the basis of these findings, the process of gathering  
41  
42 602 objective adherence data and implementing it alongside a behavioural intervention is  
43  
44 603 both possible and effective.  
45  
46  
47  
48

49 604 Given the known difficulties with nebuliser use among PWCF, interventions that can  
50  
51 605 make it less effortful are important[91]. In particular, healthy behaviours are better  
52  
53 606 predicted by a patient’s level of automatic behavioural repetition than their beliefs or  
54  
55 607 experiences, meaning a focus on increasing habit strength is critical for chronic  
56  
57 608 disease self-management[92]. Through delivery of intervention components designed  
58  
59  
60

1  
2  
3 609 to promote habit formation, we intend to reduce effort with the CFHH intervention.  
4  
5 610 We are limited in drawing conclusions as to the impact of habit formation  
6  
7 611 components of the intervention from this analysis; this is mostly due to the limited  
8  
9 612 time constraints of the feasibility study leaving insufficient opportunity for habit  
10  
11 613 formation[93]. However, there was some indication that habit components were  
12  
13 614 useful and we have elsewhere demonstrated the importance of habit in high adherence  
14  
15 615 [94,95]. It has also been indicated that adherence interventions focusing on habit  
16  
17 616 formation are the most effective[96].  
18  
19 617 Successful habit formation will reduce burden by making sustained self-care  
20  
21 618 automatic. The CFHH intervention aims to deliver the fall in burden highlighted by  
22  
23 619 the Lind alliance prioritisation exercise as the most important goal of CF research.  
24  
25 620  
26  
27 621 To date, there is little previous research showing the effects of giving patients access  
28  
29 622 to their data, with respect to health outcomes and cost-effectiveness. Amidst the  
30  
31 623 evidence that does exist, the research is generally poor and lacks information about  
32  
33 624 context and implementation[97,98]. Following modifications made to our complex  
34  
35 625 intervention, the full scale RCT across 19 UK centres (ISRCTN55504164) will  
36  
37 626 provide high quality evidence, indicating the impact of adherence data on sustained  
38  
39 627 self-care. The full-scale RCT will include a further process evaluation and health-  
40  
41 628 economic modelling. Furthermore, the CFHealthHub Data Observatory  
42  
43 629 (ISRCTN14464661) following on from the RCT will address the issue of how to  
44  
45 630 embed the use of adherence data in routine practice for healthcare professionals[99–  
46  
47 631 103]. The sites involved in the reported pilot study have now transitioned into the  
48  
49 632 Data Observatory, eventually to be joined by sites involved in the full-scale RCT.  
50  
51 633 Data collected in the data observatory quality improvement project will be used in the  
52  
53  
54  
55  
56  
57  
58  
59  
60

1  
2  
3 634 development of generalisable theory and practical guidance about the collaborative  
4  
5 635 use of adherence data [104,105], with a focus on optimising the use of health care  
6  
7  
8 636 resources and improving patient care [61]. The Observatory will act as a platform for  
9  
10 637 efficient trials[106,107], providing an opportunity to share processes and  
11  
12 638 improvement activities to enable participating CF clinical research teams to meet the  
13  
14  
15 639 demands of future research [108].  
16  
17

## 18 640 **Conclusions**

19 641 We have developed a theory-based complex intervention to help PWCF adhere to  
20  
21  
22 642 their medication and form habits of sustained self-care. The process evaluation  
23  
24 643 identified potential sources of intervention failure and modifications have been made  
25  
26 644 accordingly. With improved intervention processes, it is feasible and acceptable to  
27  
28  
29 645 support sustained self-care via medication adherence through the application of  
30  
31 646 behaviour change theory delivered through digital and human components.  
32  
33

## 34 647 **Declarations**

### 35 648 **List of abbreviations**

36  
37 649 CF – Cystic Fibrosis  
38  
39 650 CFHH – CFHealthHub complex intervention  
40  
41 651 CFQ-R – Cystic Fibrosis Questionnaire-Revised  
42  
43 652 CHAOS - Confusion, Hubbub, and Order Scale  
44  
45 653 COM- BMQ – The Capability Opportunity Motivation Behaviour Beliefs  
46  
47 654 Questionnaire  
48  
49 655 EQ-5D-5L – EuroQol generic health status measure  
50  
51 656 FEV1 - Forced expiratory volume in 1 second  
52  
53 657 GAD-7 – General Anxiety Disorder 7-item  
54  
55 658 IVAB - Intravenous Antibiotics  
56  
57 659 MAD-3 Medication Adherence Data  
58  
59 660 MDT – Multi-Disciplinary Team  
60  
61 661 PAM-13 - Patient Activation Measure  
62  
63 662 PHQ-8 – Patient Health Questionnaire depression scale  
64  
65 663 PWCF – People With Cystic Fibrosis  
66  
67 664 RCT – Randomised Controlled Trial  
68  
69 665 SRBAI – Self-Report Behavioural Automaticity Index  
70  
71 666

1  
2  
3 **667 Ethics, consent and permissions**

4  
5 668 Written informed consent was obtained prior to participation.

6  
7 **669 Ethical approval**

8 670 The study received ethical approval from the London Brent Research Ethics

9  
10 671 Committee (16/LO/0356).

11  
12  
13  
14 **672 Consent for publication**

15  
16 673 In the consent form, participants signed a statement to confirm consent for publication  
17 674 of anonymised quotes, in reports, conference presentations and journal publications.

18  
19 **675 Availability of data and materials**

20 676 Requests for further data not available in this publication can be directed at Sheffield  
21 677 Clinical Trials Research Unit. Email: ctru@sheffield.ac.uk Tel: 0114 222 0866

22  
23  
24 **678 Competing interests**

25 679 Martin Wildman received funding from Zambon and support from Philips Respironics  
26 680 for the early intervention development work. This has not had any direct influence on  
27 681 the feasibility study reported here. In addition, Martin Wildman has worked with Pari  
28 682 to carry out studies using the e-track. This has not had any direct influence on the  
29 683 feasibility study reported here. The University of Manchester software team received  
30 684 funding from Pari to create a medication reporting component within the  
31 685 CFHealthHub software. This has not had any direct influence on the feasibility study  
32 686 reported here.

33  
34 687  
35 688 The other authors declare that they have no competing interests.

36  
37  
38 **689 Funding**

39 690 This report presents independent research funded by the NIHR under its Grants for  
40 691 Applied Research Programme (Grant Reference Number RP-PG-1212-20015). The  
41 692 views and opinions expressed by authors in this publication are those of the authors  
42 693 and do not necessarily reflect those of the NHS, the NIHR, Medical Research Council  
43 694 (MRC), Central Commissioning Facility (CCF), the Programme Grants for Applied  
44 695 Research Programme, or the Department of Health and Social Care.

45  
46 696  
47 697

48  
49 **698 Authors' contributions**

50  
51 699  
52 700 Daniel Hind (Assistant Director, CTRU), Sarah Drabble (Research Associate) and Laura  
53 701 Mandefield (Statistician), together produced the first draft of the report.

54 702  
55 703 The following conceived of or designed the work: Martin Wildman (Consultant Respiratory  
56 704 Physician), Alicia O’Cathain (Professor of Health Services Research), Stephen Walters  
57 705 (Professor of Medical Statistics and Clinical Trials), Madelynne Arden (Professor of Health  
58 706 Psychology), Marlene Hutchings (Physiotherapist), Judy Bradley (Professor of

1  
2  
3 707 Physiotherapy), John Ainsworth (Professor of Health Informatics), Daniel Beever (Patient  
4 708 and Public Involvement Representative) and Daniel Hind.

5 709  
6 710 The following were involved in the acquisition of data for the work: Julia Nightingale  
7 711 (Consultant in Respiratory Medicine), Mark Allenby (Consultant in Respiratory Medicine),  
8 712 Jane Dewar (Consultant in Respiratory Medicine), Sarah Drabble, Madelynne Arden, Chin  
9 713 Maguire, Hannah Cantrill, Alexander Scott (Research Associate), Sam Keating (Research  
10 714 Associate), Marlene Hutchings and Pauline Whelan (mHealth Applications Manager).  
11 715

12 716 The following were involved in the analysis of data: Daniel Hind, Sarah Drabble, Alicia  
13 717 O’Cathain, Daniel Beever, Alexander Scott, Sam Keating, Madelynne Arden, Laura  
14 718 Mandefield, Simon Waterhouse (Data Manager).  
15 719

16 720 Daniel Hind, Sarah Drabble, Madelynne Arden, Laura Mandefield, Simon Waterhouse, Chin  
17 721 Maguire, Hannah Cantrill, Louisa Robinson, Marlene Hutchings, Judy Bradley, Julia  
18 722 Nightingale, Mark Allenby, Jane Dewar, Daniel Beever, Stephen Walters, Alicia O’Cathain,  
19 723 Martin J Wildman, were involved in the interpretation of data for the work.  
20 724

21 725 All authors were involved in the final approval of the version to be published.  
22 726

23 727 All authors agree to be accountable for all aspects of the work in ensuring that questions  
24 728 related to the accuracy or integrity of any part of the work are appropriately investigated and  
25 729 resolved.  
26 730

## 27 731 **Acknowledgements**

28 732  
29 733 We would like to thank the trial participants who offered us their time. We gratefully  
30 734 acknowledge the clerical and other input of Helen Wakefield, Heather Dakin, Katie  
31 735 Shore and Louise Turner, trial support officers.  
32 736

33 737 We would also like to thank Claire Oliver, Fiona Haynes and Lisa Evans for their  
34 738 commitment and hard work in delivering the intervention and supporting the study.  
35 739

36 740 Professor Walters is a National Institute for Health Research (NIHR) Senior  
37 741 Investigator. The views expressed in this article are those of the author(s) and not  
38 742 necessarily those of the NHS, the NIHR, or the Department of Health and Social  
39 743 Care.  
40 744

41  
42  
43  
44  
45  
46  
47 745  
48  
49  
50  
51  
52  
53  
54  
55  
56  
57  
58  
59  
60

## 746 References

- 747 1 Mowat A. Why does cystic fibrosis display the prevalence and distribution  
748 observed in human populations? *Curr Pediatr Res* 2017;**21**:164–71.
- 749 2 Jeffery A, Charman S, Cosgriff R, *et al.* *UK Cystic Fibrosis Registry Annual  
750 Data Report 2016*. London: : Cystic Fibrosis Trust 2017.
- 751 3 Cystic Fibrosis Foundation. *Annual Data Report 2016 Cystic Fibrosis  
752 Foundation Patient Registry*. Bethesda, Maryland: : Cystic Fibrosis Foundation  
753 Patient 2017. [https://www.cff.org/Research/Researcher-Resources/Patient-  
754 Registry/2016-Patient-Registry-Annual-Data-Report.pdf](https://www.cff.org/Research/Researcher-Resources/Patient-Registry/2016-Patient-Registry-Annual-Data-Report.pdf)
- 755 4 European Cystic Fibrosis Society. *ECFS Patient Registry Annual Data Report*.  
756 Karup, Denmark: : European Cystic Fibrosis Society 2013.
- 757 5 Ahern S, Sims G, Tacey M, *et al.* *The Australian Cystic Fibrosis Data Registry  
758 Annual Report, 2015*. Monash University, Department of Epidemiology and  
759 Preventive Medicine, October 2017, Report No 18. Melbourne, Victoria: :  
760 Australian Cystic Fibrosis Data Registry 2017.
- 761 6 Cystic Fibrosis Canada. *The Canadian CF Registry 2016 Annual Data Report*.  
762 Toronto: : Cystic Fibrosis Canada 2017.  
763 [http://www.cysticfibrosis.ca/uploads/2016 Registry Annual Data Report.pdf](http://www.cysticfibrosis.ca/uploads/2016%20Registry%20Annual%20Data%20Report.pdf)
- 764 7 Southern KW, Barker PM, Solis-Moya A, *et al.* Macrolide antibiotics for cystic  
765 fibrosis. In: Southern KW, ed. *Cochrane Database of Systematic Reviews*.  
766 Chichester, UK: : John Wiley & Sons, Ltd 2011.  
767 doi:10.1002/14651858.CD002203.pub3
- 768 8 Ramsey BW, Davies J, McElvaney NG, *et al.* A CFTR Potentiator in Patients  
769 with Cystic Fibrosis and the G551D Mutation. *N Engl J Med* 2011;**365**:1663–  
770 72. doi:10.1056/NEJMoa1105185
- 771 9 McCoy KS, Quittner AL, Oermann CM, *et al.* Inhaled aztreonam lysine for

- 1  
2  
3 772 chronic airway *Pseudomonas aeruginosa* in cystic fibrosis. *Am J Respir Crit*  
4  
5 773 *Care Med* 2008;**178**:921–8.  
6  
7  
8 774 10 Ryan G, Mukhopadhyay S, Singh M. Nebulised anti-pseudomonal antibiotics  
9  
10 775 for cystic fibrosis. In: Ryan G, ed. *Cochrane Database of Systematic Reviews*.  
11  
12 776 Chichester, UK: : John Wiley & Sons, Ltd 2003.  
13  
14 777 doi:10.1002/14651858.CD001021  
15  
16  
17 778 11 Jones AP, Wallis C. Dornase alfa for cystic fibrosis. In: Jones AP, ed.  
18  
19 779 *Cochrane Database of Systematic Reviews*. Chichester, UK: : John Wiley &  
20  
21 780 Sons, Ltd 2010. doi:10.1002/14651858.CD001127.pub2  
22  
23  
24 781 12 Wark P, McDonald VM. Nebulised hypertonic saline for cystic fibrosis. In:  
25  
26 782 Wark P, ed. *Cochrane Database of Systematic Reviews*. Chichester, UK: : John  
27  
28 783 Wiley & Sons, Ltd 2009. doi:10.1002/14651858.CD001506.pub3  
29  
30  
31 784 13 Ryan G, Singh M, Dwan K. Inhaled antibiotics for long-term therapy in cystic  
32  
33 785 fibrosis. *Cochrane database Syst Rev* 2011;:CD001021.  
34  
35 786 doi:10.1002/14651858.CD001021.pub2  
36  
37  
38 787 14 Eakin MN, Bilderback A, Boyle MP, *et al*. Longitudinal association between  
39  
40 788 medication adherence and lung health in people with cystic fibrosis. *J Cyst*  
41  
42 789 *Fibros* 2011;**10**:258. doi:10.1016/j.jcf.2011.03.005  
43  
44  
45 790 15 Briesacher BA, Quittner AL, Saiman L, *et al*. Adherence with tobramycin  
46  
47 791 inhaled solution and health care utilization. *BMC Pulm Med* 2011;**11**:5.  
48  
49 792 doi:10.1186/1471-2466-11-5  
50  
51  
52 793 16 Smyth A, Lewis S, Bertenshaw C, *et al*. Case-control study of acute renal  
53  
54 794 failure in patients with cystic fibrosis in the UK. *Thorax* 2008;**63**:532–5.  
55  
56 795 doi:10.1136/thx.2007.088757  
57  
58  
59 796 17 Mayer-Hamblett N, Rosenfeld M, Emerson J, *et al*. Developing Cystic Fibrosis  
60



- 1  
2  
3 797 Lung Transplant Referral Criteria Using Predictors of 2-Year Mortality. *Am J*  
4  
5 798 *Respir Crit Care Med* 2002;**166**:1550–5. doi:10.1164/rccm.200202-087OC  
6  
7  
8 799 18 Shiers D, Rafi I, Cooper S, *et al.* 2014 update (with acknowledgement to the  
9  
10 800 late Helen Lester for her contribution to the original 2012 version) Positive  
11  
12 801 Cardiometabolic Health Resource: an intervention framework for patients with  
13  
14 802 psychosis and schizophrenia. *R Coll Psychiatr* 2014;:London.  
15  
16  
17 803 19 Quittner AL, Zhang J, Marynchenko M, *et al.* Pulmonary medication adherence  
18  
19 804 and health-care use in cystic fibrosis. *Chest* 2014;**146**:142–51.  
20  
21 805 doi:10.1378/chest.13-1926  
22  
23  
24 806 20 Narayanan S, Mainz JG, Gala S, *et al.* Adherence to therapies in cystic fibrosis:  
25  
26 807 a targeted literature review. *Expert Rev Respir Med* 2017;**11**:129–45.  
27  
28 808 doi:10.1080/17476348.2017.1280399  
29  
30  
31 809 21 McManus P. Lead Pharmacist - specialised services (South Yorkshire and  
32  
33 810 Bassetlaw) NHS England.  
34  
35  
36 811 22 McNeil S. Personal communication from Stephanie McNeil, Chief Statistician  
37  
38 812 of UK CF Registry.  
39  
40 813 23 Daniels T, Goodacre L, Sutton C, *et al.* Accurate assessment of adherence: self-  
41  
42 814 report and clinician report vs electronic monitoring of nebulizers. *Chest*  
43  
44 815 2011;**140**:425–32. doi:10.1378/chest.09-3074  
45  
46  
47 816 24 Hoo Z, Curley R, Walters S, *et al.* Exploring the implications of different  
48  
49 817 approaches to estimate centre-level adherence using objective adherence data  
50  
51 818 in an adult cystic fibrosis centre - a retrospective observational study. *J Cyst*  
52  
53 819 *Fibros* 2020;**19**:162–7. doi:10.1016/j.jcf.2019.10.008  
54  
55  
56 820 25 Horne RW, Barber N, Elliot R, *et al.* Concordance, adherence and compliance  
57  
58 821 in medicine taking: A conceptual map and research priorities. National Co-  
59  
60



- 1  
2  
3 822 ordinating Centre for NHS Service Delivery and Organisational R&D  
4  
5 823 (NCCSDO). 2005.  
6  
7  
8 824 26 James Lind Alliance. Priority Setting Partnership: Cystic Fibrosis.  
9  
10 825 2017.<http://www.jla.nihr.ac.uk/priority-setting-partnerships/cystic-fibrosis/>  
11  
12 826 (accessed 2 Jun 2017).  
13  
14 827 27 Clegg D, Barker R. *Case Method Fast-Track: A RAD Approach*. Boston, MA: :  
15  
16 Addison-Wesley 1994.  
17 828  
18  
19 829 28 Bugge C, Williams B, Hagen S, *et al*. A process for Decision-making after  
20  
21 830 Pilot and feasibility Trials (ADePT): development following a feasibility study  
22  
23 831 of a complex intervention for pelvic organ prolapse. *Trials* 2013;**14**:353.  
24  
25 832 doi:10.1186/1745-6215-14-353  
26  
27  
28 833 29 Hind D, Drabble SJ, Arden MA, *et al*. Supporting medication adherence for  
29  
30 834 adults with cystic fibrosis: a randomised feasibility study. *BMC Pulm Med*  
31  
32 835 2019;**19**:77. doi:10.1186/s12890-019-0834-6  
33  
34  
35 836 30 Cherryholmes CH. Notes on Pragmatism and Scientific Realism. *Educ Res*  
36  
37 837 1992;**21**:13–7. doi:10.3102/0013189X021006013  
38  
39  
40 838 31 Yin RK. *Case Study Research: Design and Methods*. London: : Sage 2014.  
41  
42 839 32 Ritchie J, Spencer L. Qualitative data analysis for applied policy research. In:  
43  
44 840 Bryman A, Burgess RG, eds. *Analysing qualitative data*. Routledge 1994. 173–  
45  
46 841 94.  
47  
48  
49 842 33 Cane J, O'Connor D, Michie S. Validation of the theoretical domains  
50  
51 843 framework for use in behaviour change and implementation research.  
52  
53 844 *Implement Sci* 2012;**7**:37. doi:10.1186/1748-5908-7-37  
54  
55  
56 845 34 Linnan L, Steckler A. Process evaluation for public health interventions and  
57  
58 846 research: an overview. In: Linnan L, Steckler A, eds. *Process evaluation for*  
59  
60

- 1  
2  
3 847 *public health interventions and research*. San Francisco: : Jossey-Bass 2002.  
4  
5 848 1–  
6  
7  
8 849 23.[http://media.johnwiley.com.au/product\\_data/excerpt/66/07879597/0787959](http://media.johnwiley.com.au/product_data/excerpt/66/07879597/0787959)  
9  
10 850 766.pdf (accessed 6 May 2014).  
11  
12 851 35 Farmer T, Robinson K, Elliott SJ, *et al*. Developing and implementing a  
13  
14 852 triangulation protocol for qualitative health research. *Qual Health Res*  
15  
16 853 2006;**16**:377–94. doi:10.1177/1049732305285708  
17  
18  
19 854 36 Yin RK. Analyzing Case Study Evidence: How to Start Your Analysis , Your  
20  
21 855 Analytic Choices , and How They Work. In: *Case Study Research: Design and*  
22  
23 856 *Methods*. London: : Sage 2014. 133–76. doi:10.1111/bjd.13028  
24  
25  
26 857 37 Guetterman TC, Fetters MD, Creswell JW. Integrating quantitative and  
27  
28 858 qualitative results in health science mixed methods research through joint  
29  
30 859 displays. *Ann Fam Med* 2015;**13**:554–61. doi:10.1370/afm.1865  
31  
32  
33 860 38 Fetters MD, Curry LA, Creswell JW. Achieving integration in mixed methods  
34  
35 861 designs - Principles and practices. *Health Serv Res* 2013;**48**:2134–56.  
36  
37 862 doi:10.1111/1475-6773.12117  
38  
39  
40 863 39 Simons H. Case Study Research: In-Depth Understanding in Context. In:  
41  
42 864 Leavy P, ed. *The Oxford Handbook of Qualitative Research*. Oxford: : Oxford  
43  
44 865 University Press 2014. 455–70.  
45  
46  
47 866 40 Perla RJ, Provost LP, Murray SK. The run chart: a simple analytical tool for  
48  
49 867 learning from variation in healthcare processes. *BMJ Qual Saf* 2011;**20**:46–51.  
50  
51 868 doi:10.1136/bmjqs.2009.037895  
52  
53  
54 869 41 Bandura A. Social Cognitive Theory: An Agentic Perspective. *Annu Rev*  
55  
56 870 *Psychol* 2001;**52**:1–26. doi:10.1146/annurev.psych.52.1.1  
57  
58 871 42 Carver CS, Scheier MF. Control theory: a useful conceptual framework for  
59  
60

- 1  
2  
3 872 personality-social, clinical, and health psychology. *Psychol Bull* 1982;**92**:111–  
4  
5 873 35. doi:10.1037/0033-2909.92.1.111  
6  
7  
8 874 43 Ho YC. Abduction ? Deduction ? Induction ? Is there a Logic of Exploratory  
9  
10 875 Data Analysis ? *Proc Annu Meet Am Educ Res Assoc* 1994;:28.  
11  
12 876 doi:http://citeseerx.ist.psu.edu/viewdoc/download?doi=10.1.1.135.3507&rep=r  
13  
14 877 ep1&type=pdf  
15  
16  
17 878 44 Peirce CS. How to make our ideas clear. *Pop Sci Mon* 1878;**12**:286–302.  
18  
19 879 45 Swedberg R. Before theory comes theorizing or how to make social science  
20  
21 880 more interesting. *Br J Sociol* 2016;**67**. doi:10.1111/1468-4446.12184  
22  
23  
24 881 46 Timmermans S, Tavory I. Theory Construction in Qualitative Research: From  
25  
26 882 Grounded Theory to Abductive Analysis. *Sociol Theory* 2012;**30**:167–86.  
27  
28 883 doi:10.1177/0735275112457914  
29  
30  
31 884 47 Miles MB, Huberman AM, Saldaña J. Methods of Ordering. In: *Qualitative*  
32  
33 885 *Data Analysis: A Methods Sourcebook*. London: 2014. 193–220.  
34  
35  
36 886 48 Hoo ZH, Boote J, Wildman MJ, *et al*. Determinants of objective adherence to  
37  
38 887 nebulised medications among adults with cystic fibrosis: an exploratory mixed  
39  
40 888 methods study comparing low and high adherers. *Heal Psychol Behav Med*  
41  
42 889 2017;**5**:299–316. doi:10.1080/21642850.2017.1338958  
43  
44  
45 890 49 Wong MD, Sarkisian C a., Davis C, *et al*. The Association Between Life  
46  
47 891 Chaos, Health Care Use, and Health Status Among HIV-Infected Persons. *J*  
48  
49 892 *Gen Intern Med* 2007;**22**:1286–91. doi:10.1007/s11606-007-0265-6  
50  
51  
52 893 50 Horne R, Weinman J, Hankins M. The beliefs about medicines questionnaire:  
53  
54 894 The development and evaluation of a new method for assessing the cognitive  
55  
56 895 representation of medication. *Psychol Health* 1999;**14**:1–24.  
57  
58 896 doi:10.1080/08870449908407311  
59  
60

- 1  
2  
3 897 51 Bittner K, Spence I. *Use Case Modeling*. Boston, MA: : Addison-Wesley  
4  
5 898 Professional 2002.  
6  
7 899 52 Craig Larman. *Agile and Iterative Development: A Manager's Guide*. Boston,  
8  
9 MA: : Addison-Wesley 2004.  
10  
11 900  
12 901 53 Govan JR. Infection control in cystic fibrosis: methicillin-resistant  
13  
14 902 Staphylococcus aureus, Pseudomonas aeruginosa and the Burkholderia cepacia  
15  
16 903 complex. *J R Soc Med* 2000;**93 Suppl 3**:40–  
17  
18 904 5.<http://www.ncbi.nlm.nih.gov/pubmed/10911818>  
19  
20 905 54 Wildman MJ, Hoo ZH. Moving cystic fibrosis care from rescue to prevention  
21  
22 906 by embedding adherence measurement in routine care. *Paediatr Respir Rev*  
23  
24 907 2014;**15**:16–8. doi:10.1016/j.prrv.2014.04.007  
25  
26 908 55 Schattner A. Predictors of Adherence to Inhaled Medications. *J Gen Intern*  
27  
28 909 *Med* 2013;**28**:758–758. doi:10.1007/s11606-013-2384-6  
29  
30 910 56 Battaglia M, Atkinson MA. The Streetlight Effect in Type 1 Diabetes. *Diabetes*  
31  
32 911 2015;**64**:1081–90. doi:10.2337/db14-1208  
33  
34 912 57 Kaplan A. *The Conduct of Inquiry: Methodology for Behavioral Science*. New  
35  
36 913 Brunswick, N.J.: : Transaction Publishers 1964.  
37  
38 914 58 Tversky A, Kahneman D. Availability: A heuristic for judging frequency and  
39  
40 915 probability. *Cogn Psychol* 1973;**5**:207–32. doi:10.1016/0010-0285(73)90033-9  
41  
42 916 59 Flume PA, Clancy JP, Retsch-Bogart GZ, *et al*. Continuous alternating inhaled  
43  
44 917 antibiotics for chronic pseudomonal infection in cystic fibrosis. *J Cyst Fibros*  
45  
46 918 2016;**15**:809–15. doi:10.1016/j.jcf.2016.05.001  
47  
48 919 60 Michie S, Atkins L, West R. *The Behaviour Change Wheel: A Guide To*  
49  
50 920 *Designing Interventions*. Sutton: : Silverback Publishing 2014.  
51  
52 921 61 National Institute for Health and Care Excellence. *Medicines optimisation: the*  
53  
54  
55  
56  
57  
58  
59  
60

- 1  
2  
3 922 *safe and effective use of medicines to enable best possible outcomes (NG5).*  
4  
5 923 London: : NICE 2015.  
6  
7 924 62 Carver CS, Scheier MF. *On the self-regulation of behavior*. Cambridge: :  
8  
9 Cambridge University Press 2001.  
10 925  
11  
12 926 63 Yardley L, Spring BJ, Riper H, *et al*. Understanding and Promoting Effective  
13  
14 927 Engagement With Digital Behavior Change Interventions. *Am J Prev Med*  
15  
16 928 2016;**51**:833–42. doi:10.1016/j.amepre.2016.06.015  
17  
18 929 64 Allemann SS, Nieuwlaat R, van den Bemt BJJ, *et al*. Matching Adherence  
19  
20 930 Interventions to Patient Determinants Using the Theoretical Domains  
21  
22 931 Framework. *Front Pharmacol* 2016;**7**:429. doi:10.3389/fphar.2016.00429  
23  
24 932 65 Michie S, Yardley L, West R, *et al*. Developing and evaluating digital  
25  
26 933 interventions to promote behavior change in health and health care:  
27  
28 934 Recommendations resulting from an international workshop. *J Med Internet*  
29  
30 935 *Res* 2017;**19**. doi:10.2196/jmir.7126  
31  
32 936 66 Murray E, Hekler EB, Andersson G, *et al*. Evaluating Digital Health  
33  
34 937 Interventions: Key Questions and Approaches. *Am J Prev Med* 2016;**51**:843–  
35  
36 938 51. doi:10.1016/j.amepre.2016.06.008  
37  
38 939 67 Car J, Tan WS, Huang Z, *et al*. eHealth in the future of medications  
39  
40 940 management: personalisation, monitoring and adherence. *BMC Med*  
41  
42 941 2017;**15**:73. doi:10.1186/s12916-017-0838-0  
43  
44 942 68 Baumel A, Birnbaum ML, Sucala M. A Systematic Review and Taxonomy of  
45  
46 943 Published Quality Criteria Related to the Evaluation of User-Facing eHealth  
47  
48 944 Programs. *J Med Syst* 2017;**41**:128. doi:10.1007/s10916-017-0776-6  
49  
50 945 69 Ryan C, Bergin M, Wells JS. Theoretical Perspectives of Adherence to Web-  
51  
52 946 Based Interventions: a Scoping Review. *Int J Behav Med* Published Online  
53  
54  
55  
56  
57  
58  
59  
60

- 1  
2  
3 947 First: 20 July 2017. doi:10.1007/s12529-017-9678-8  
4  
5 948 70 Van Gemert-Pijnen JE, Kelders SM, Bohlmeijer ET. Understanding the Usage  
6  
7  
8 949 of Content in a Mental Health Intervention for Depression: An Analysis of Log  
9  
10 950 Data. *J Med Internet Res* 2014;**16**:e27. doi:10.2196/jmir.2991  
11  
12 951 71 Strecher V, McClure J, Alexander G, *et al*. The Role of Engagement in a  
13  
14 952 Tailored Web-Based Smoking Cessation Program: Randomized Controlled  
15  
16 953 Trial. *J Med Internet Res* 2008;**10**:e36. doi:10.2196/jmir.1002  
17  
18 954 72 Danaher BG, Seeley JR. Methodological Issues in Research on Web-Based  
19  
20 955 Behavioral Interventions. *Ann Behav Med* 2009;**38**:28–39. doi:10.1007/s12160-  
21  
22 956 009-9129-0  
23  
24 957 73 Ainsworth B, Steele M, Stuart B, *et al*. Using an Analysis of Behavior Change  
25  
26 958 to Inform Effective Digital Intervention Design: How Did the PRIMIT Website  
27  
28 959 Change Hand Hygiene Behavior Across 8993 Users? *Ann Behav Med*  
29  
30 960 2017;**51**:423–31. doi:10.1007/s12160-016-9866-9  
31  
32 961 74 Hawe P. Lessons from complex interventions to improve health. *Annu Rev*  
33  
34 962 *Public Health* 2015;**36**:307–23. doi:10.1146/annurev-publhealth-031912-  
35  
36 963 114421  
37  
38 964 75 Sherman DAK, Nelson LD, Steele CM. Do Messages about Health Risks  
39  
40 965 Threaten the Self? Increasing the Acceptance of Threatening Health Messages  
41  
42 966 Via Self-Affirmation. *Personal Soc Psychol Bull* 2000;**26**:1046–58.  
43  
44 967 doi:10.1177/01461672002611003  
45  
46 968 76 Perski O, Blandford A, West R, *et al*. Conceptualising engagement with digital  
47  
48 969 behaviour change interventions: a systematic review using principles from  
49  
50 970 critical interpretive synthesis. *Transl Behav Med* 2017;**7**:254–67.  
51  
52 971 doi:10.1007/s13142-016-0453-1  
53  
54  
55  
56  
57  
58  
59  
60

- 1  
2  
3 972 77 Frazee SG, Muzina DJ, Nease RF. Strategies to Overcome Medication  
4  
5 973 Nonadherence. *JAMA* 2014;**311**:1693. doi:10.1001/jama.2014.1760  
6  
7  
8 974 78 Mohammed MA, Moles RJ, Chen TF. Medication-related burden and patients'  
9  
10 975 lived experience with medicine: a systematic review and metasynthesis of  
11  
12 976 qualitative studies. *BMJ Open* 2016;**6**:e010035. doi:10.1136/bmjopen-2015-  
13  
14 977 010035  
15  
16  
17 978 79 Huygens MWJ, Vermeulen J, Swinkels ICS, *et al.* Expectations and needs of  
18  
19 979 patients with a chronic disease toward self-management and eHealth for self-  
20  
21 980 management purposes. *BMC Health Serv Res* 2016;**16**:232.  
22  
23 981 doi:10.1186/s12913-016-1484-5  
24  
25  
26 982 80 Kelders SM, Oinas-Kukkonen H, Oörni A, *et al.* Health Behavior Change  
27  
28 983 Support Systems as a research discipline; a viewpoint. *Int J Med Inform*  
29  
30 984 Published Online First: 2016. doi:10.1016/j.ijmedinf.2016.06.022  
31  
32  
33 985 81 Rathbone AP, Todd A, Jamie K, *et al.* A systematic review and thematic  
34  
35 986 synthesis of patients' experience of medicines adherence. *Res Soc Adm Pharm*  
36  
37 987 Published Online First: 2016. doi:10.1016/j.sapharm.2016.06.004  
38  
39  
40 988 82 O'Connor S, Hanlon P, O'Donnell CA, *et al.* Understanding factors affecting  
41  
42 989 patient and public engagement and recruitment to digital health interventions: a  
43  
44 990 systematic review of qualitative studies. *BMC Med Inform Decis Mak*  
45  
46 991 2016;**16**:120. doi:10.1186/s12911-016-0359-3  
47  
48  
49 992 83 Bond CM. Adherence: the Holy Grail? *BMJ Qual Saf* 2016;**25**:736–8.  
50  
51 993 doi:10.1136/bmjqs-2015-004886  
52  
53  
54 994 84 Cammidge SL, Duff AJA, Latchford GJ, *et al.* When Women with Cystic  
55  
56 995 Fibrosis Become Mothers: Psychosocial Impact and Adjustments. *Pulm Med*  
57  
58 996 2016;**2016**:9458980. doi:10.1155/2016/9458980  
59  
60



- 1  
2  
3 997 85 Powell KR. Patient-Perceived Facilitators of and Barriers to Electronic Portal  
4  
5 998 Use. *CIN Comput Informatics, Nurs* 2017;**35**:565–73.  
6  
7 999 doi:10.1097/CIN.0000000000000377  
8  
9  
10 1000 86 Curtis LM, Mullen RJ, Russell A, *et al.* An efficacy trial of an electronic health  
11  
12 1001 record-based strategy to inform patients on safe medication use: The role of  
13  
14 1002 written and spoken communication. *Patient Educ Couns* 2016;**99**:1489–95.  
15  
16 1003 doi:10.1016/j.pec.2016.07.004  
17  
18  
19 1004 87 Morton K, Dennison L, May C, *et al.* Using digital interventions for self-  
20  
21 1005 management of chronic physical health conditions: A meta-ethnography review  
22  
23 1006 of published studies. *Patient Educ Couns* 2017;**100**:616–35.  
24  
25 1007 doi:10.1016/j.pec.2016.10.019  
26  
27  
28 1008 88 Hanlon P, Daines L, Campbell C, *et al.* Telehealth Interventions to Support  
29  
30 1009 Self-Management of Long-Term Conditions: A Systematic Metareview of  
31  
32 1010 Diabetes, Heart Failure, Asthma, Chronic Obstructive Pulmonary Disease, and  
33  
34 1011 Cancer. *J Med Internet Res* 2017;**19**:e172. doi:10.2196/jmir.6688  
35  
36  
37 1012 89 Oussedik, E., Foy, C.G, Masicampo, E.J., Kammrath, L.K, Anderson, R.E,  
38  
39 1013 Feldman SR (in press). Accountabiliy: a missing construct in models of  
40  
41 1014 adherence behavior and in clinical practice. *Patient Prefer Adherence*  
42  
43 1015 2017;:1285–94. doi:10.2147/PPA.S135895  
44  
45  
46 1016 90 O’Donohoe R, Fullen BM. Adherence of subjects with cystic fibrosis to their  
47  
48 1017 home program: a systematic review. *Respir Care* 2014;**59**:1731–46.  
49  
50 1018 doi:10.4187/respcare.02990  
51  
52  
53 1019 91 Sawicki GS, Goldman DP, Chan W, *et al.* Patient preference for treatment  
54  
55 1020 administration in cystic fibrosis. *Am J Pharm Benefits* 2015;**7**:174–81.  
56  
57  
58 1021 92 Phillips LA, Cohen J, Burns E, *et al.* Self-management of chronic illness: the  
59  
60



- 1  
2  
3 1022 role of ‘habit’ versus reflective factors in exercise and medication adherence. *J*  
4  
5 1023 *Behav Med* 2016;**39**:1076–91. doi:10.1007/s10865-016-9732-z  
6  
7  
8 1024 93 Lally P, van Jaarsveld CHM, Potts HWW, *et al.* How are habits formed:  
9  
10 1025 Modelling habit formation in the real world. *Eur J Soc Psychol* 2010;**40**:998–  
11  
12 1026 1009. doi:10.1002/ejsp.674  
13  
14 1027 94 Arden MA, Drabble S, O’Cathain A, *et al.* Adherence to medication in adults  
15  
16 1028 with Cystic Fibrosis: An investigation using objective adherence data and the  
17  
18 1029 Theoretical Domains Framework. *Br J Health Psychol* Published Online First:  
19  
20 1030 March 2019. doi:10.1111/bjhp.12357  
21  
22  
23 1031 95 Hoo ZH, Gardner B, Arden MA, *et al.* Role of habit in treatment adherence  
24  
25 1032 among adults with cystic fibrosis. *Thorax* 2019;**74**:197–9.  
26  
27 1033 doi:10.1136/thoraxjnl-2017-211453  
28  
29  
30 1034 96 Conn VS, Ruppard TM. Medication adherence outcomes of 771 intervention  
31  
32 1035 trials: Systematic review and meta-analysis. *Prev Med (Baltim)* 2017;**99**:269–  
33  
34 1036 76. doi:10.1016/j.ypmed.2017.03.008  
35  
36  
37 1037 97 Goldzweig CL, Orshansky G, Paige NM, *et al.* Electronic patient portals:  
38  
39 1038 evidence on health outcomes, satisfaction, efficiency, and attitudes: a  
40  
41 1039 systematic review. *Ann Intern Med* 2013;**159**:677–87. doi:10.7326/0003-4819-  
42  
43 1040 159-10-201311190-00006  
44  
45  
46 1041 98 Lau AY, Arguel A, Dennis S, *et al.* “Why Didn’t it Work?” Lessons From a  
47  
48 1042 Randomized Controlled Trial of a Web-based Personally Controlled Health  
49  
50 1043 Management System for Adults with Asthma. *J Med Internet Res*  
51  
52 1044 2015;**17**:e283. doi:10.2196/jmir.4734  
53  
54  
55 1045 99 Kruse CS, Kothman K, Anerobi K, *et al.* Adoption Factors of the Electronic  
56  
57 1046 Health Record: A Systematic Review. *JMIR Med informatics* 2016;**4**:e19.  
58  
59  
60

- 1  
2  
3 1047 doi:10.2196/medinform.5525  
4  
5 1048 100 Greenhalgh T, Swinglehurst D, Stones R. Rethinking resistance to ‘big IT’: a  
6  
7 1049 sociological study of why and when healthcare staff do not use nationally  
8  
9 1050 mandated information and communication technologies. *Heal Serv Deliv Res*  
10  
11 1051 2014;**2**:1–86. doi:10.3310/hsdr02390  
12  
13  
14 1052 101 Ross J, Stevenson F, Lau R, *et al.* Factors that influence the implementation of  
15  
16 1053 e-health: a systematic review of systematic reviews (an update). *Implement Sci*  
17  
18 1054 2016;**11**:146. doi:10.1186/s13012-016-0510-7  
19  
20  
21 1055 102 Hennemann S, Beutel ME, Zwerenz R. Ready for eHealth? Health  
22  
23 1056 Professionals’ Acceptance and Adoption of eHealth Interventions in Inpatient  
24  
25 1057 Routine Care. *J Health Commun* 2017;**22**:274–84.  
26  
27 1058 doi:10.1080/10810730.2017.1284286  
28  
29  
30 1059 103 Harris M, Lawn SJ, Morello A, *et al.* Practice change in chronic conditions  
31  
32 1060 care: an appraisal of theories. *BMC Health Serv Res* 2017;**17**:170.  
33  
34 1061 doi:10.1186/s12913-017-2102-x  
35  
36  
37 1062 104 Ovretveit J, Leviton L, Parry G. Increasing the generalisability of improvement  
38  
39 1063 research with an improvement replication programme. *BMJ Qual Saf*  
40  
41 1064 2011;**20**:i87–91. doi:10.1136/bmjqs.2010.046342  
42  
43  
44 1065 105 Eikey E V, Reddy MC, Kuziemyky CE. Examining the role of collaboration in  
45  
46 1066 studies of health information technologies in biomedical informatics: A  
47  
48 1067 systematic review of 25 years of research. *J Biomed Inform* 2015;**57**:263–77.  
49  
50 1068 doi:10.1016/j.jbi.2015.08.006  
51  
52  
53 1069 106 Relton C, Torgerson D, O’Cathain A, *et al.* Rethinking pragmatic randomised  
54  
55 1070 controlled trials: introducing the ‘cohort multiple randomised controlled trial’  
56  
57 1071 design. *BMJ* 2010;**340**:c1066. doi:10.1136/bmj.c1066  
58  
59  
60

- 1  
2  
3 1072 107 Young-Afat DA, Verkooijen HAM, van Gils CH, *et al.* Staged-informed  
4  
5 1073 Consent in the Cohort Multiple Randomized Controlled Trial Design.  
6  
7 1074 *Epidemiology* 2016;**27**:389–92. doi:10.1097/EDE.0000000000000435  
8  
9  
10 1075 108 Retsch-Bogart GZ, Van Daltsen JM, Marshall BC, *et al.* Highly effective cystic  
11  
12 1076 fibrosis clinical research teams: critical success factors. *J Gen Intern Med*  
13  
14 1077 2014;**29 Suppl 3**:S714-23. doi:10.1007/s11606-014-2896-8  
15  
16  
17 1078 109 Hibbard JH, Mahoney ER, Stockard J, *et al.* Development and testing of a short  
18  
19 1079 form of the patient activation measure. *Health Serv Res* 2005;**40**:1918–30.  
20  
21 1080 doi:10.1111/j.1475-6773.2005.00438.x  
22  
23  
24 1081 110 Verplanken BAS, Ell OR, Orbell S. Reflections on past behavior: A self-report  
25  
26 1082 index of habit strength. *J Appl Soc Psychol* 2003;**33**:1313–30.  
27  
28 1083 doi:10.1111/j.1559-1816.2003.tb01951.x  
29  
30  
31 1084  
32  
33 1085  
34  
35 1086 ...  
36  
37 1087  
38  
39 1088  
40  
41  
42 1089  
43  
44  
45  
46  
47  
48  
49  
50  
51  
52  
53  
54  
55  
56  
57  
58  
59  
60

1090 **Tables**1091 **Table 1 - Quantitative data contributing to the understanding of**  
1092 **logic model constructs**

1093

| #                 | Logic model column / construct       | Quantitative                                                                                                                                                                                                                                                |
|-------------------|--------------------------------------|-------------------------------------------------------------------------------------------------------------------------------------------------------------------------------------------------------------------------------------------------------------|
| <b>INPUTS</b>     |                                      |                                                                                                                                                                                                                                                             |
| 3                 | Prescription data                    | CFHH; problems documented in implementation log.                                                                                                                                                                                                            |
| 7                 | COM-BMQ questionnaire responses      | Capability Opportunity Motivation Behaviour Beliefs Questionnaire (COM-BMQ), incorporating the Beliefs about Medicines Questionnaire (Nebuliser adherence)[50], one additional belief item, one intention item, one confidence item, and a list of barriers |
| 9                 | Interventionist training programme   | Structured questionnaire on interventionist confidence after training programme.                                                                                                                                                                            |
| 11                | Competency/Fidelity assessment       | Structured instrument for the assessment of interventionist competence.                                                                                                                                                                                     |
| <b>ENGAGEMENT</b> |                                      |                                                                                                                                                                                                                                                             |
| 13                | Clinicians accessing adherence data* | CFHH click analytics.                                                                                                                                                                                                                                       |
| 14                | Adherence data tracking              | CFHH click analytics.                                                                                                                                                                                                                                       |
| 15                | Participant accessing CFHealthHub    | CFHH click analytics.                                                                                                                                                                                                                                       |

|                                                                   |                                                                            |                                                             |
|-------------------------------------------------------------------|----------------------------------------------------------------------------|-------------------------------------------------------------|
| 17                                                                | CFHealthHub Intervention sessions delivered according to Manual (Fidelity) | Project-specific structured fidelity assessment instrument. |
| 18                                                                | Initial session, and then review at each clinic visit                      | CFHH click analytics.                                       |
| <b>ACTIVITIES</b>                                                 |                                                                            |                                                             |
| <i>Intervention components for all participants</i>               |                                                                            |                                                             |
| 20                                                                | Self-monitoring adherence                                                  | CFHH click analytics.                                       |
| 21                                                                | Tailored education about treatment                                         | CFHH click analytics.                                       |
| 22                                                                | Tailored patient stories (videos)                                          | CFHH click analytics.                                       |
| <i>Intervention components for those with adequate motivation</i> |                                                                            |                                                             |
| 23                                                                | Personalised goal-setting                                                  | CFHH click analytics.                                       |
| 24                                                                | Goal review                                                                | CFHH click analytics.                                       |
| 25                                                                | Personalised action plan                                                   | CFHH click analytics.                                       |
| 26                                                                | Tailored problem-solving                                                   | CFHH click analytics.                                       |
| <b>IMMEDIATE OUTCOMES</b>                                         |                                                                            |                                                             |
| <i>For all participants</i>                                       |                                                                            |                                                             |
| 28                                                                | Acute awareness of adherence /                                             | Subjective adherence single question (self-                 |

|    |                                                  |                                                                                                                                                                                                                                                |
|----|--------------------------------------------------|------------------------------------------------------------------------------------------------------------------------------------------------------------------------------------------------------------------------------------------------|
|    | increased Motivation                             | report estimate of adherence as a percentage);<br>COM-BMQ.                                                                                                                                                                                     |
| 29 | Increased necessity and decreased concern        | COM-BMQ and Patient Activation Measure (PAM-13[109])                                                                                                                                                                                           |
| 30 | Increased self-efficacy / Motivation             | COM-BMQ single question about confidence to adhere; PAM-13.                                                                                                                                                                                    |
|    | <i><b>For those with adequate motivation</b></i> |                                                                                                                                                                                                                                                |
| 31 | Increased self-efficacy/ Motivation              | COM-BMQ single question about confidence to adhere; PAM-13.                                                                                                                                                                                    |
| 32 | Increased habit / reduced chaos                  | Self-Report Behavioural Automaticity Index (SRBAI) automaticity-specific subscale of the Self Report Habit index to capture habit-based behaviour patterns[110]; Confusion, Hubbub, and Order Scale (CHAOS 6-item): measure of life chaos[49]. |
| 33 | Reduced barriers                                 | No change in the group averages for The Beliefs about Medicines Questionnaire - specific (Nebuliser adherence) (BMQ 21-item[50])                                                                                                               |
|    | <b>INTERMEDIATE OUTCOMES</b>                     |                                                                                                                                                                                                                                                |
| 35 | Increased adherence                              | Nebuliser data (CFHH)                                                                                                                                                                                                                          |

1  
2  
3  
4  
5  
6  
7  
8  
9  
10  
11  
12  
13  
14  
15  
16  
17  
18  
19  
20  
21  
22  
23  
24  
25  
26  
27  
28  
29  
30  
31  
32  
33  
34  
35  
36  
37  
38  
39  
40  
41  
42  
43  
44  
45  
46  
47  
48  
49  
50  
51  
52  
53  
54  
55  
56  
57  
58  
59  
60

|  |  |  |
|--|--|--|
|  |  |  |
|--|--|--|

1094  
1095  
1096

For peer review only

1  
2  
3  
4 1097 **Figures**

5  
6 1098

7  
8 1099 **Figure 1 - Logic model**

9  
10 1100

11  
12 1101 **Figure 2 - The digital platform**

13  
14 1102

15  
16 1103 **Figure 3 – Objective versus subjective adherence at 5 (+/- 1) months stratified**  
17  
18 **by adherence**

19  
20 1104  
21 1105

22  
23  
24  
25 1106 **Additional files**

26 1107

27  
28 1108 **Additional file 01 – Participant adherence run charts for fourteen case studies**  
29 1109

30  
31 1110 **Additional file 02 – Study protocol and interview guides**

32 1111

33 1112

34 1113 **Additional file 03 – Quantitative results from process evaluation**

35 1114

36  
37 1115 **Additional file 04 – Joint display table**

38 1116

39  
40 1117 **Additional file 05 – Case-ordered descriptive matrix for fourteen case studies**

41 1118

42  
43 1119 **Additional file 06 – Statistical methods, outcomes and estimation**

44 1120

45  
46 1121 **Additional file 07 – Changes to intervention procedures**

47  
48  
49  
50  
51  
52  
53  
54  
55  
56  
57  
58  
59  
60



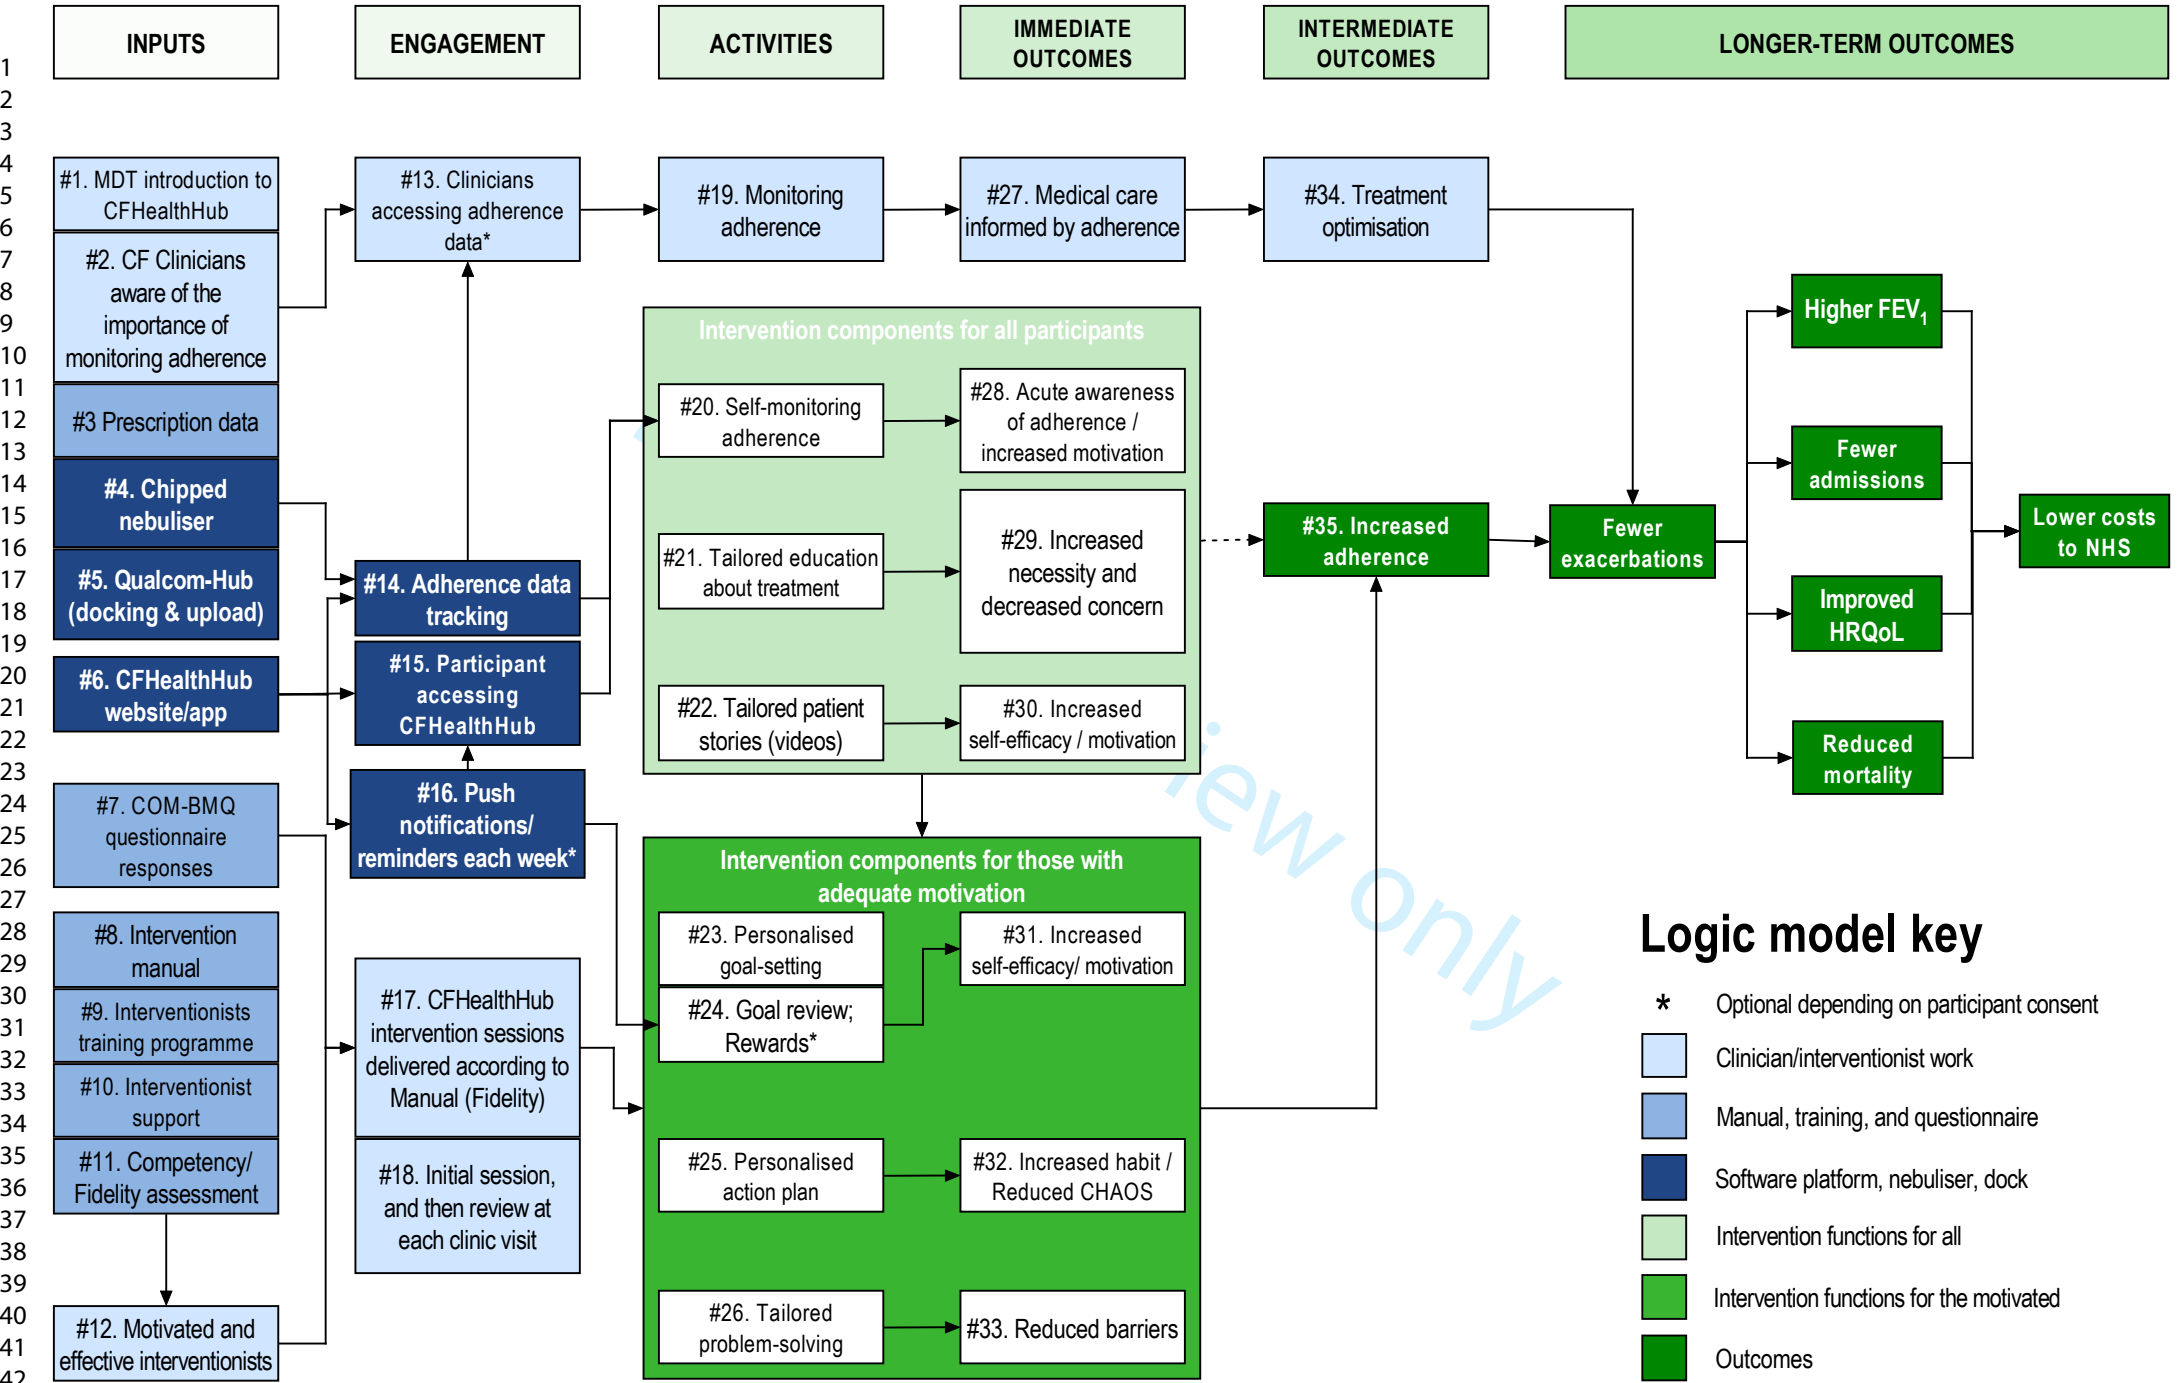

1  
2  
3  
4  
5  
6  
7  
8  
9  
10  
11  
12  
13  
14  
15  
16  
17  
18  
19  
20  
21  
22  
23  
24  
25  
26  
27  
28  
29  
30  
31  
32  
33  
34  
35  
36  
37  
38  
39  
40  
41  
42  
43  
44  
45  
46  
47  
48  
49  
50  
51  
52  
53  
54  
55  
56  
57  
58  
59  
60

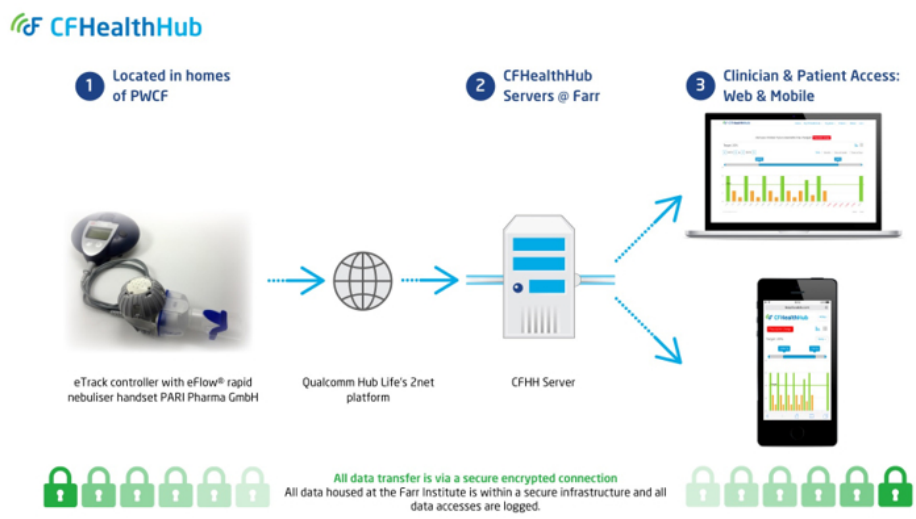

The digital platform

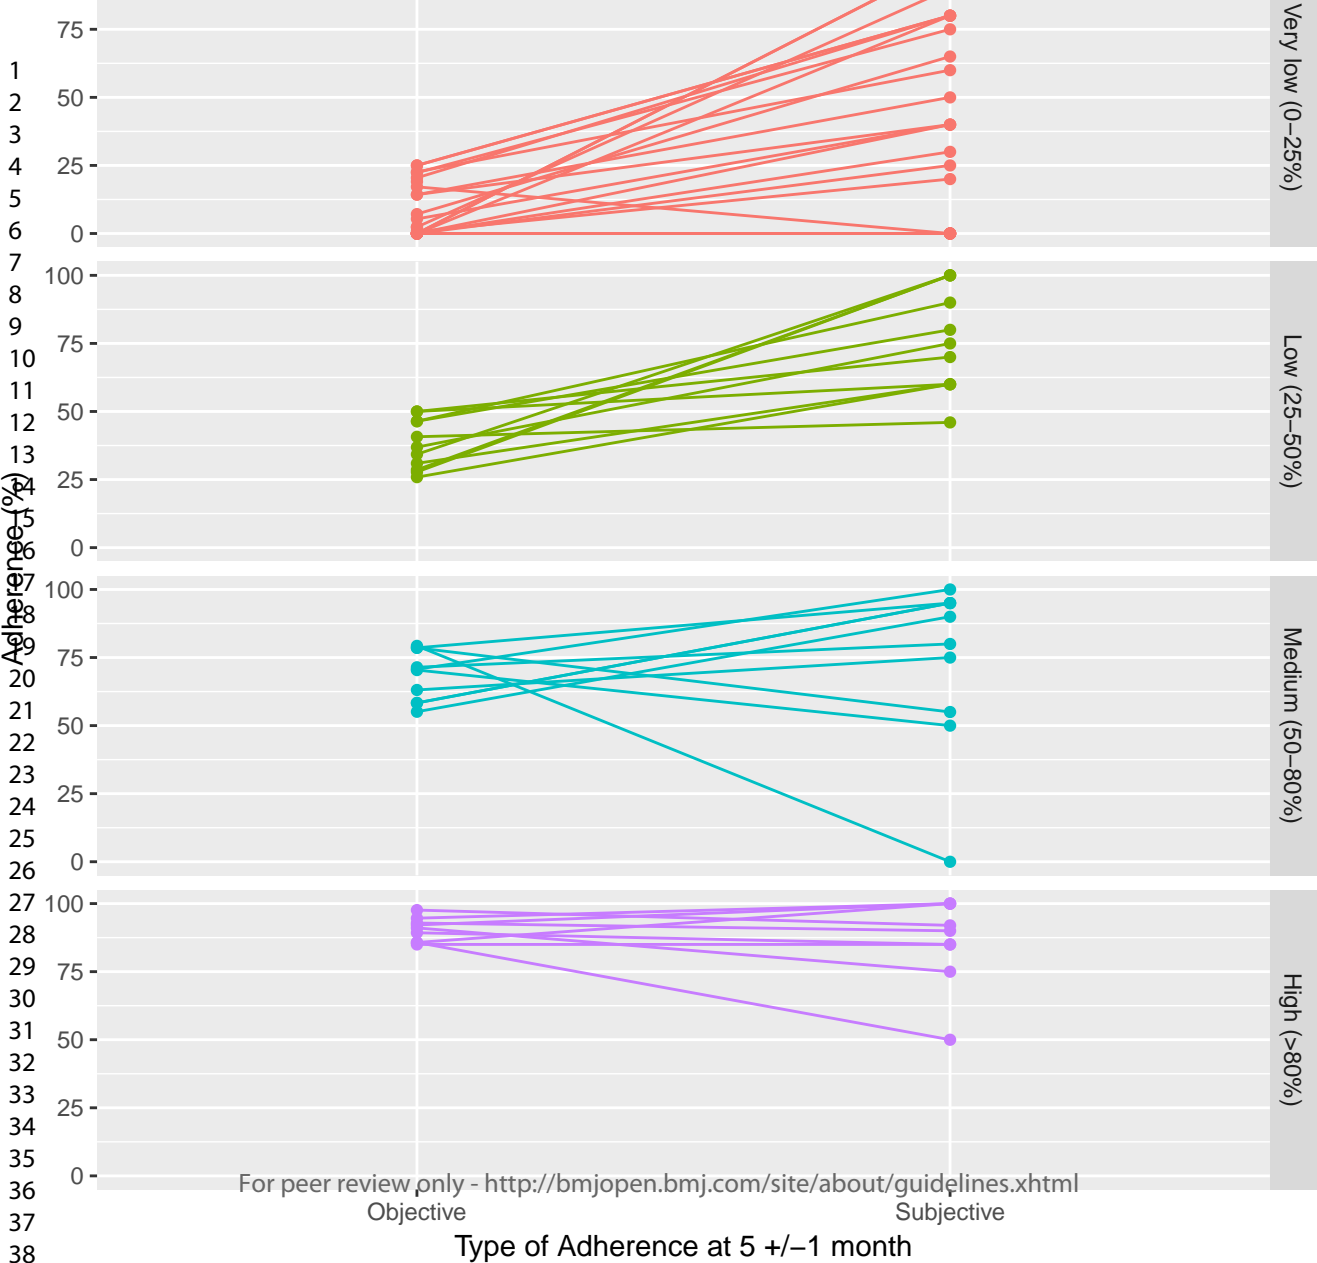

For peer review only - <http://bmjopen.bmj.com/site/about/guidelines.xhtml>

Objective Subjective

Type of Adherence at 5 +/- 1 month

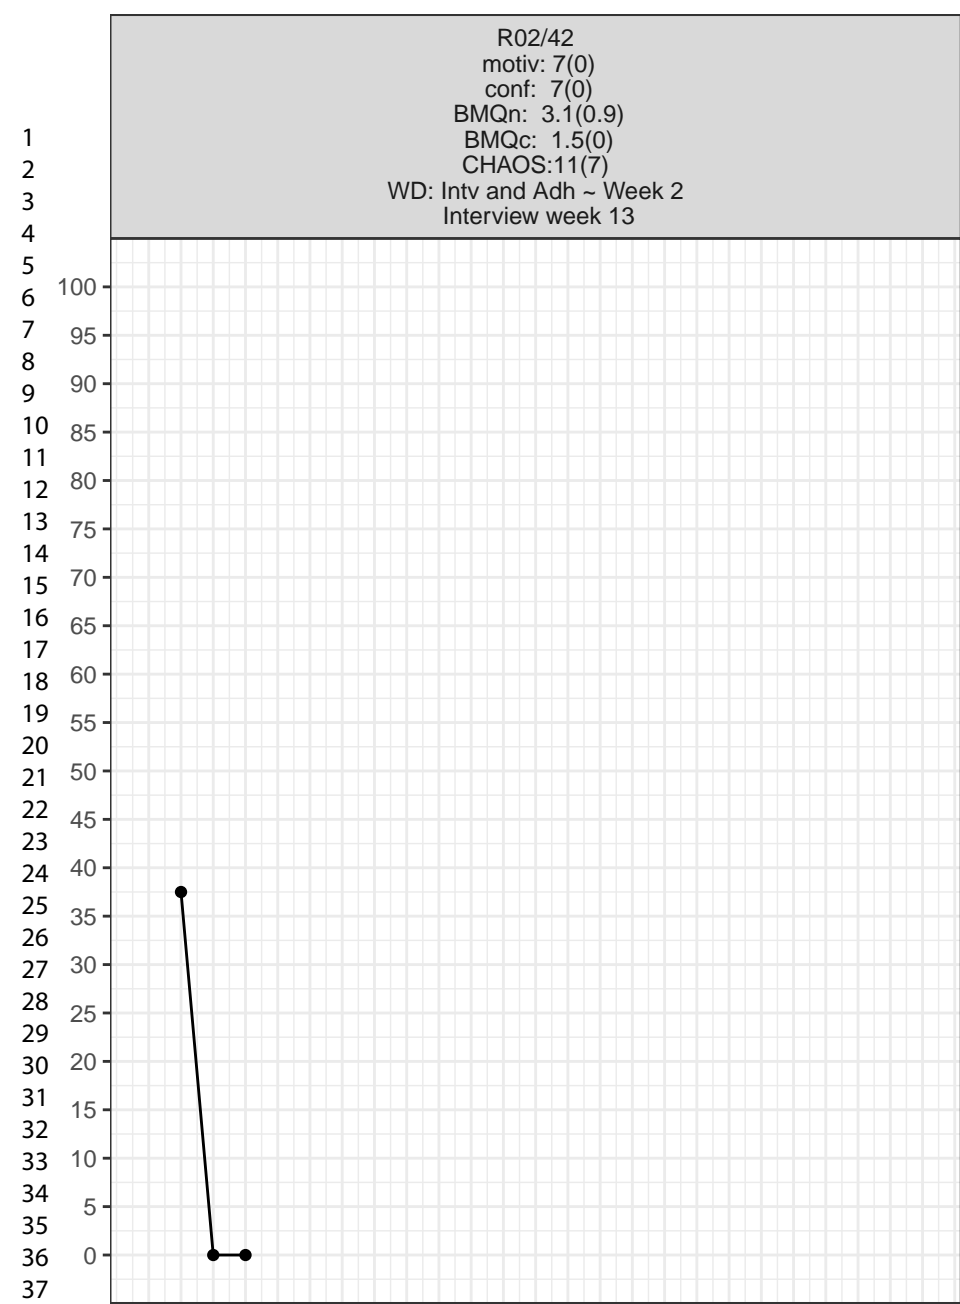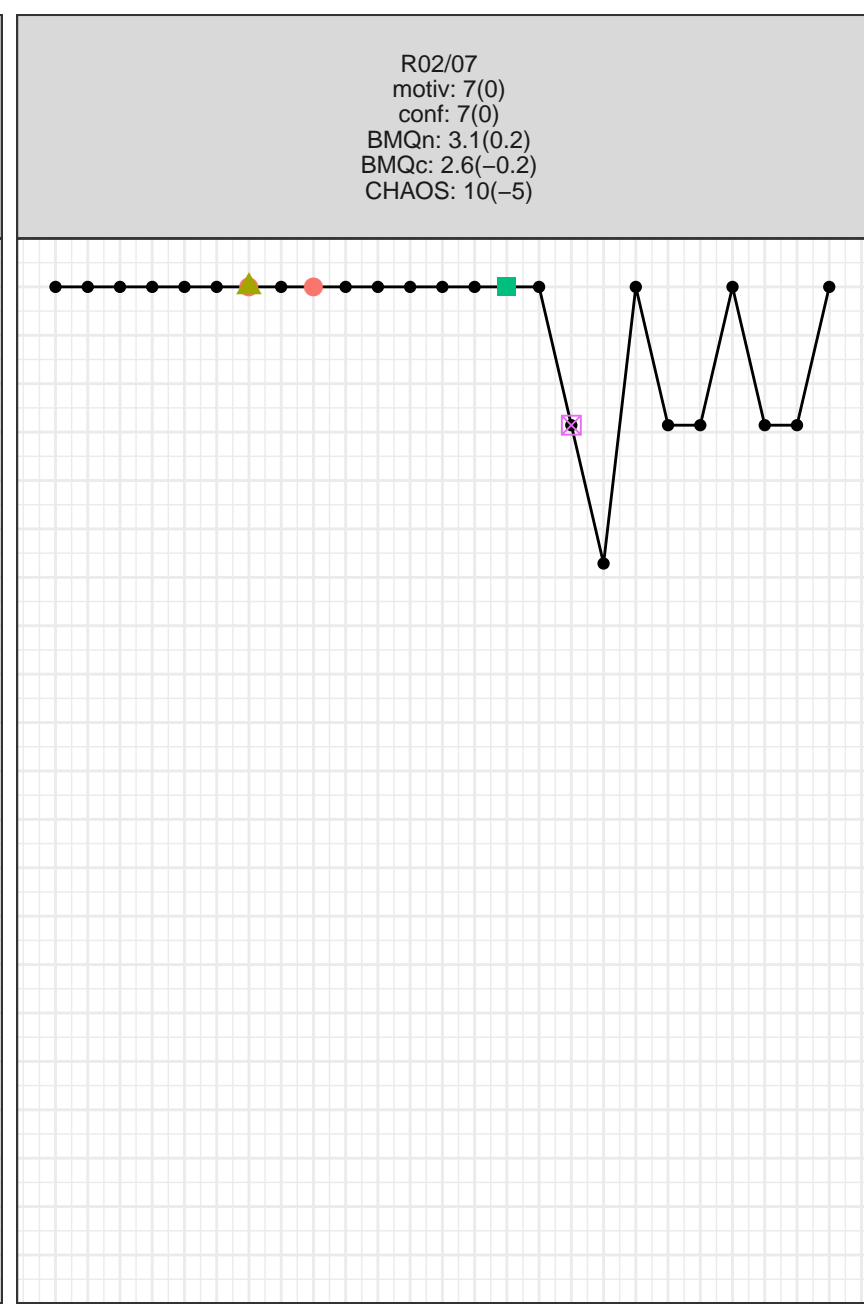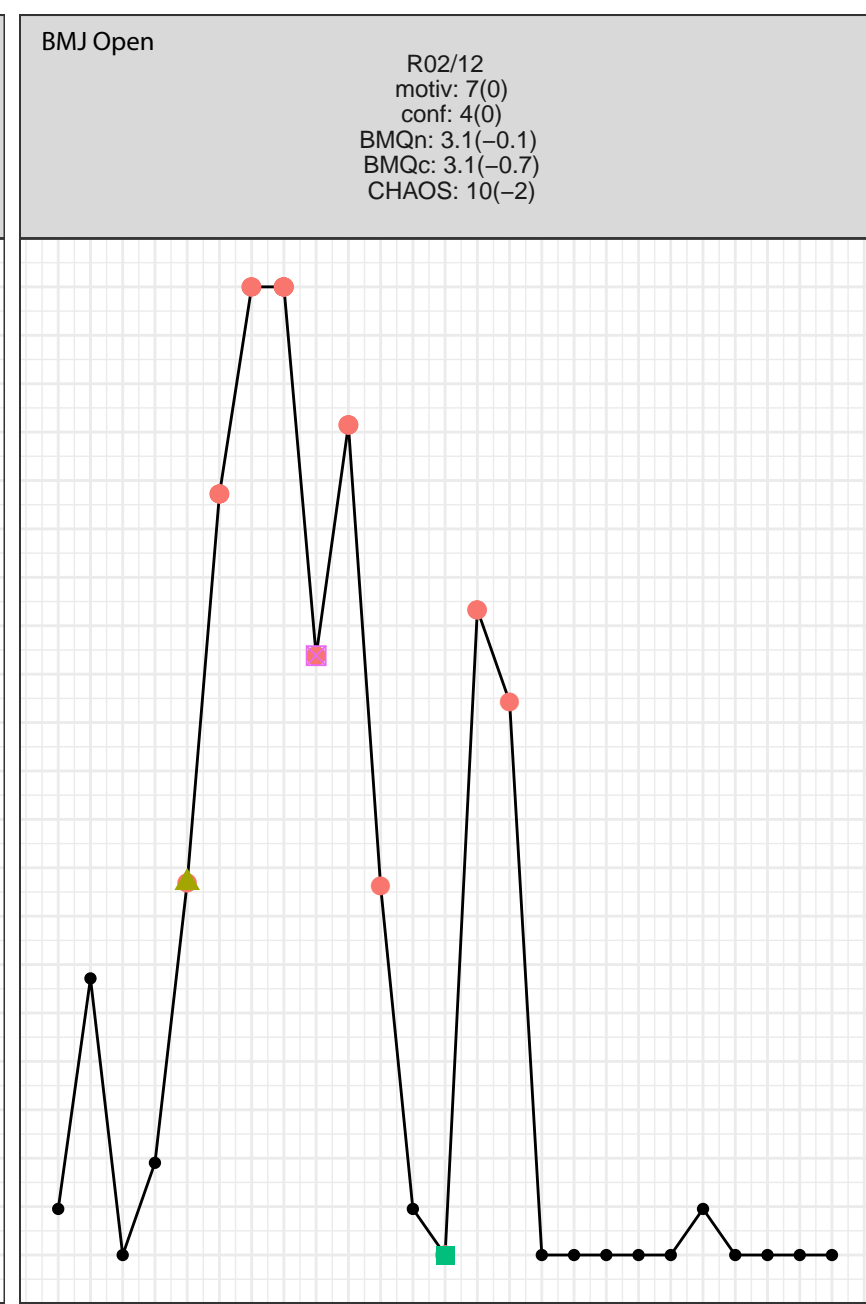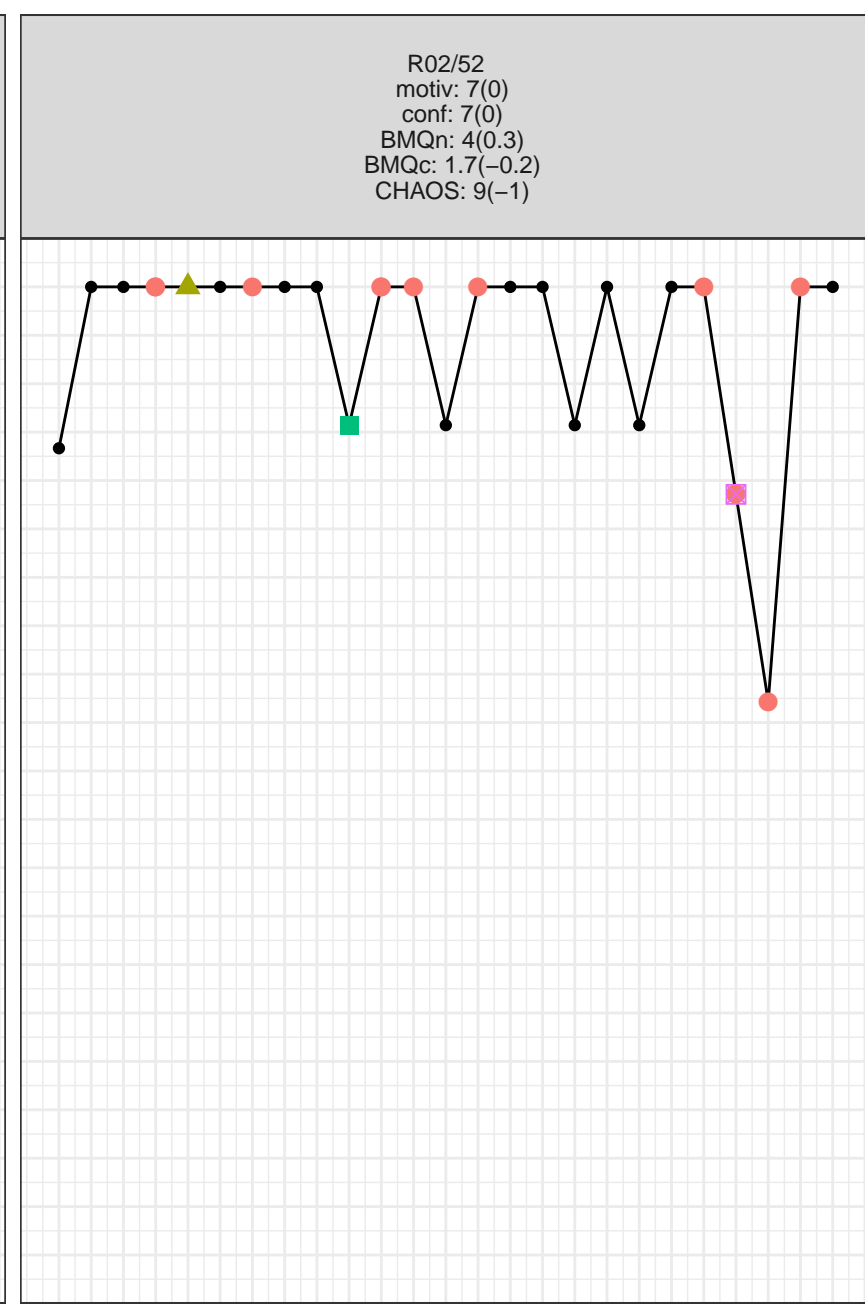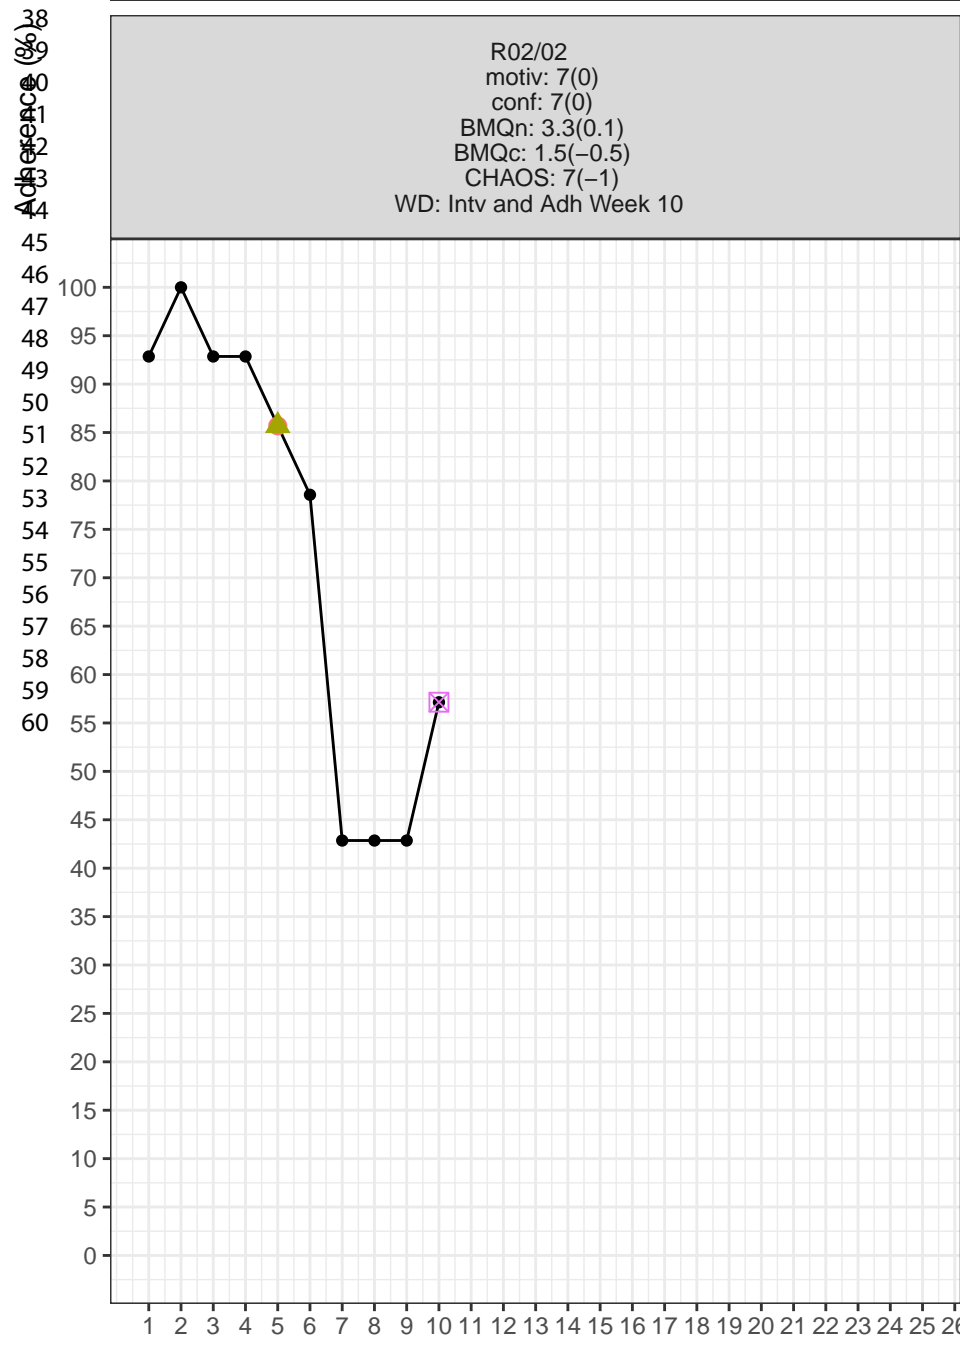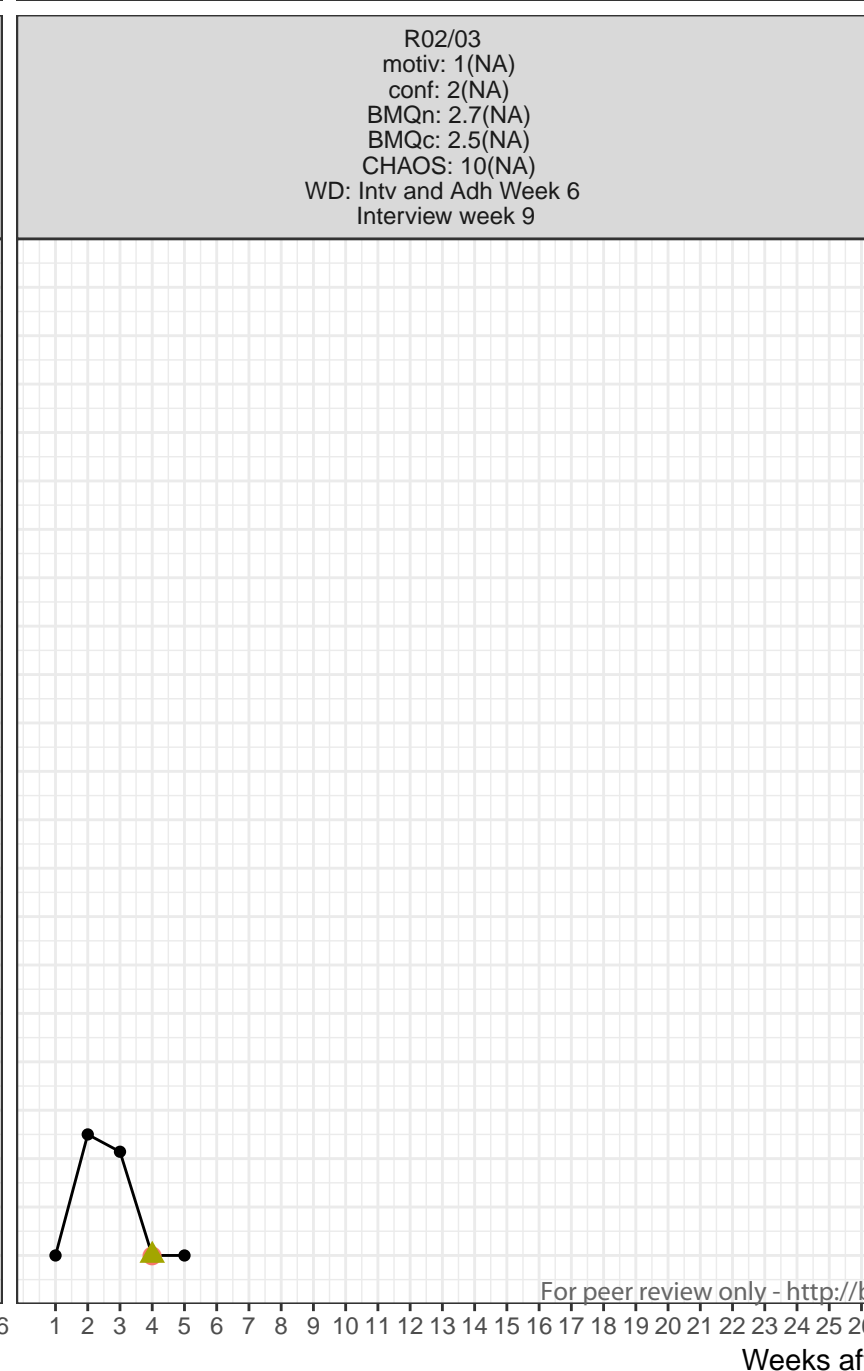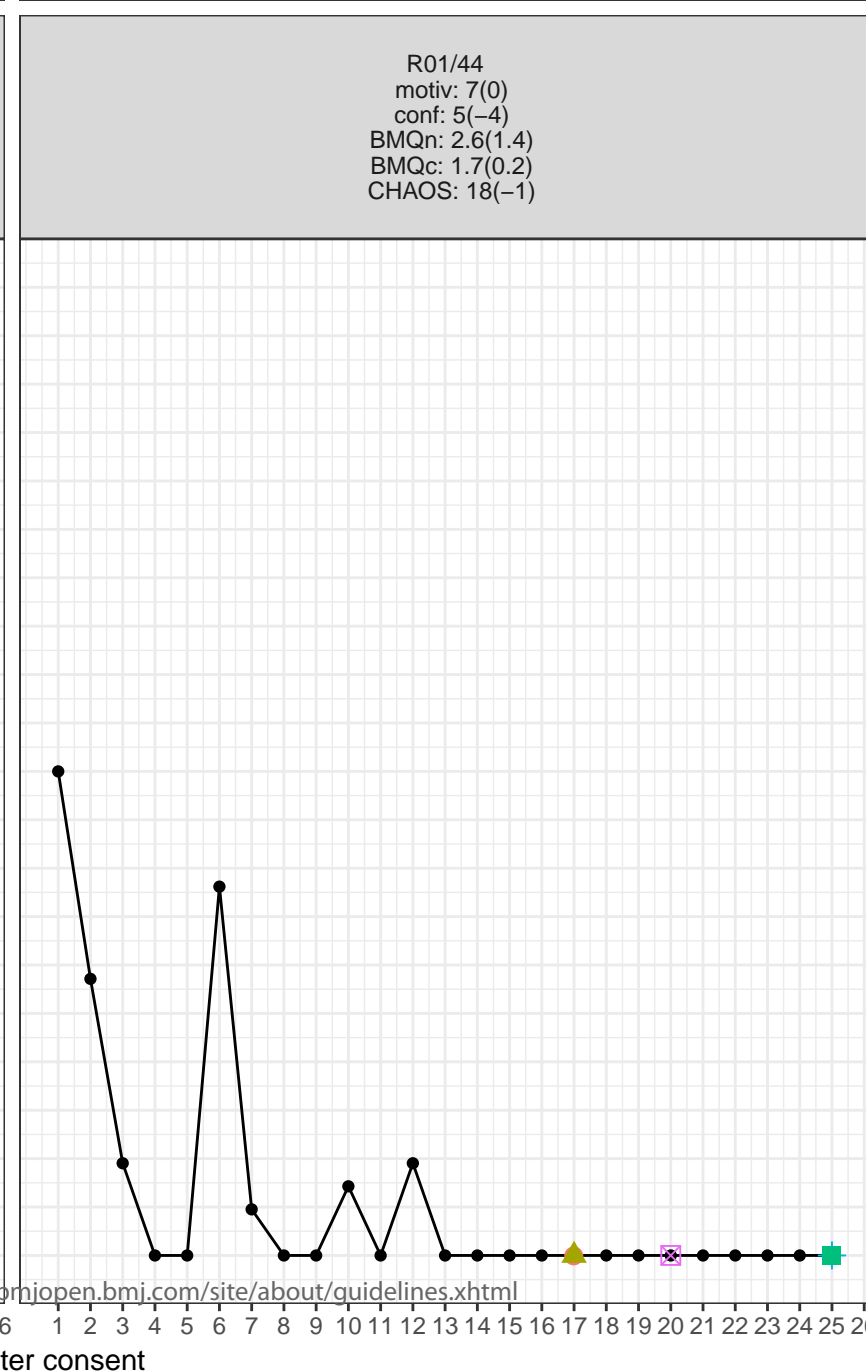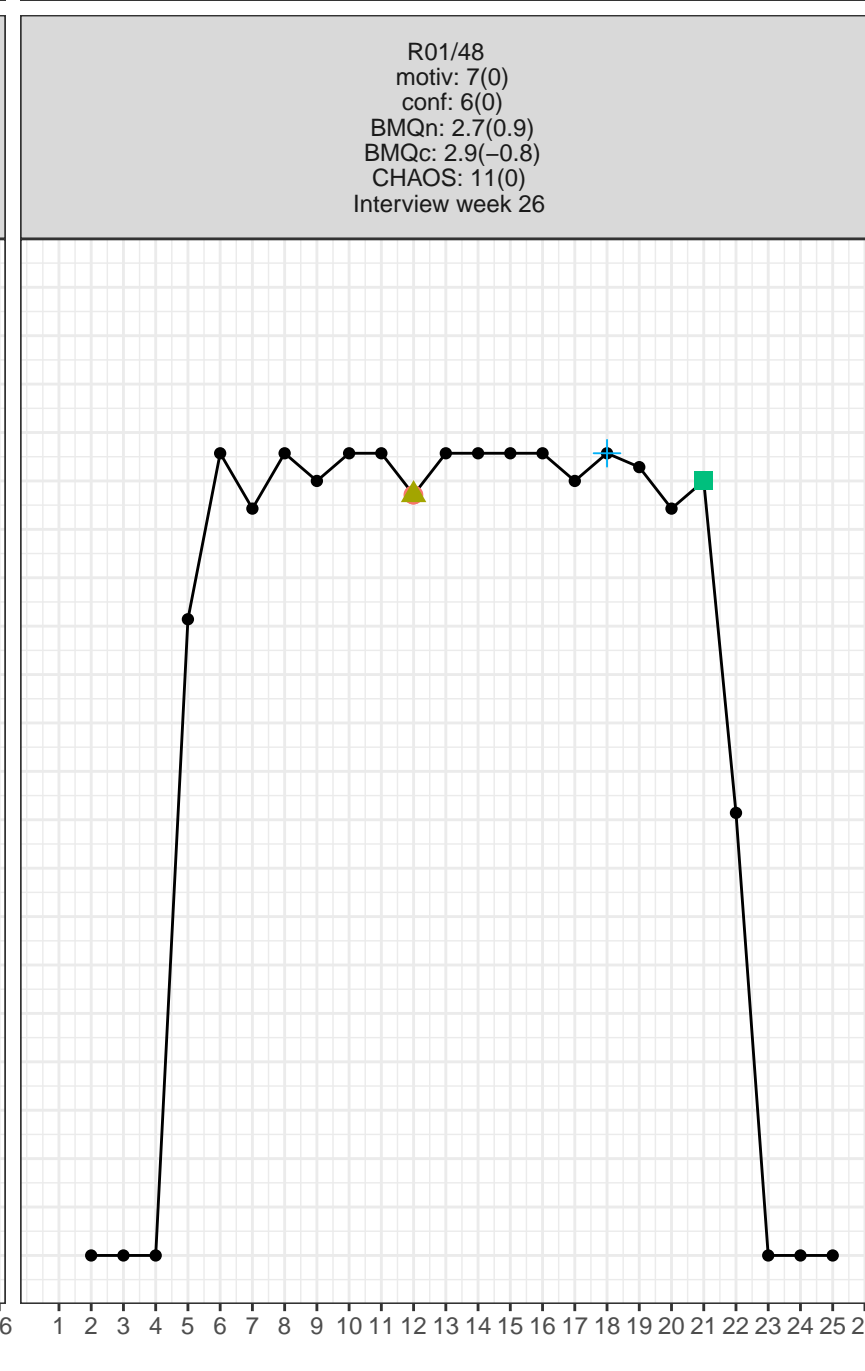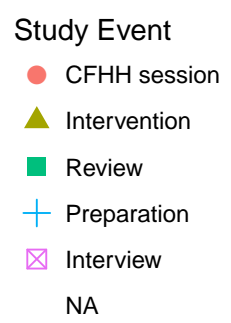

R01/49  
motiv: 7(0)  
conf: 7(0)  
BMQn: 3.7(-0.8)  
BMQc: 3.1(-0.7)  
CHAOS: 8(0)  
Interview week 26

R01/54  
motiv: 7(-1)  
conf: 6(0)  
BMQn: 2.6(-0.3)  
BMQc: 1.7(0.4)  
CHAOS: 9(-1)  
Interview week 28

BMJ Open

R01/39  
motiv: 7(0)  
conf: 7(0)  
BMQn: 4.4(0.5)  
BMQc: 2.6(-0.4)  
CHAOS: 13(2)  
Interview week 34

R01/02  
motiv: 7(0)  
conf: 2(3)  
BMQn: 2.6(0.8)  
BMQc: 2.3(-0.2)  
CHAOS: 18(-1)

1  
2  
3  
4  
5  
6  
7  
8  
9  
10  
11  
12  
13  
14  
15  
16  
17  
18  
19  
20  
21  
22  
23  
24  
25  
26  
27  
28  
29  
30  
31  
32  
33  
34  
35  
36  
37

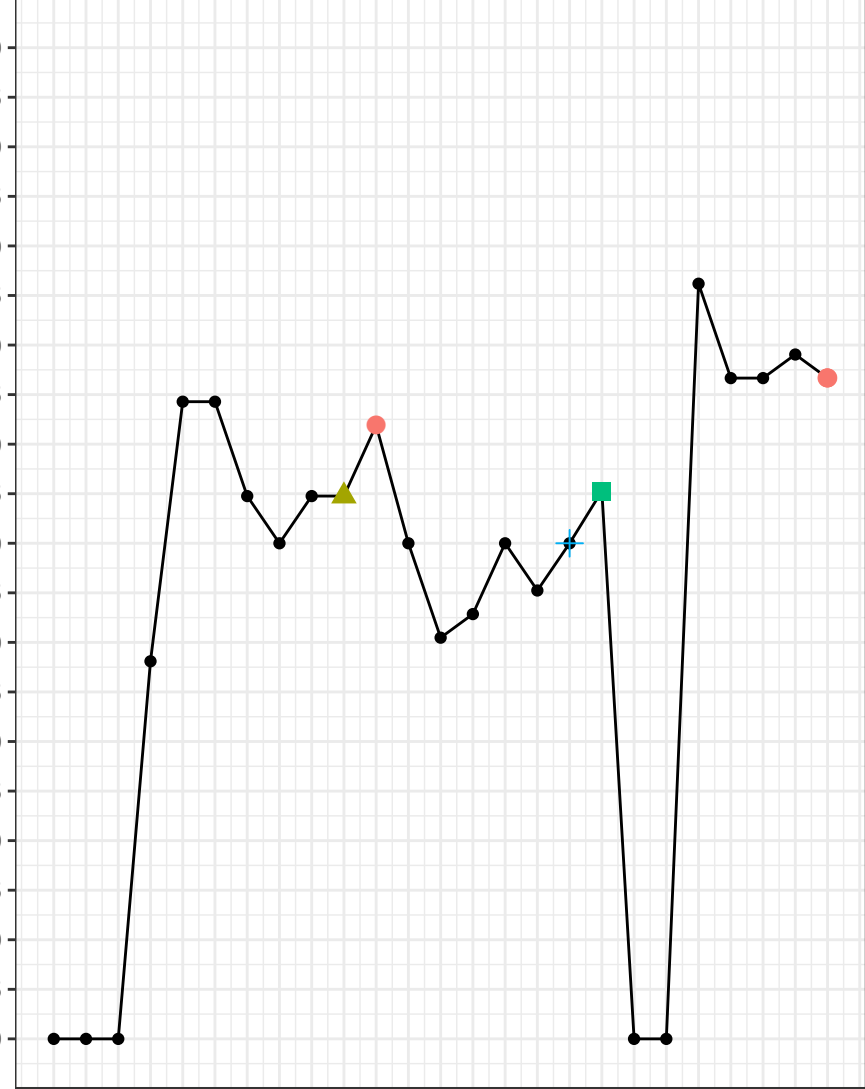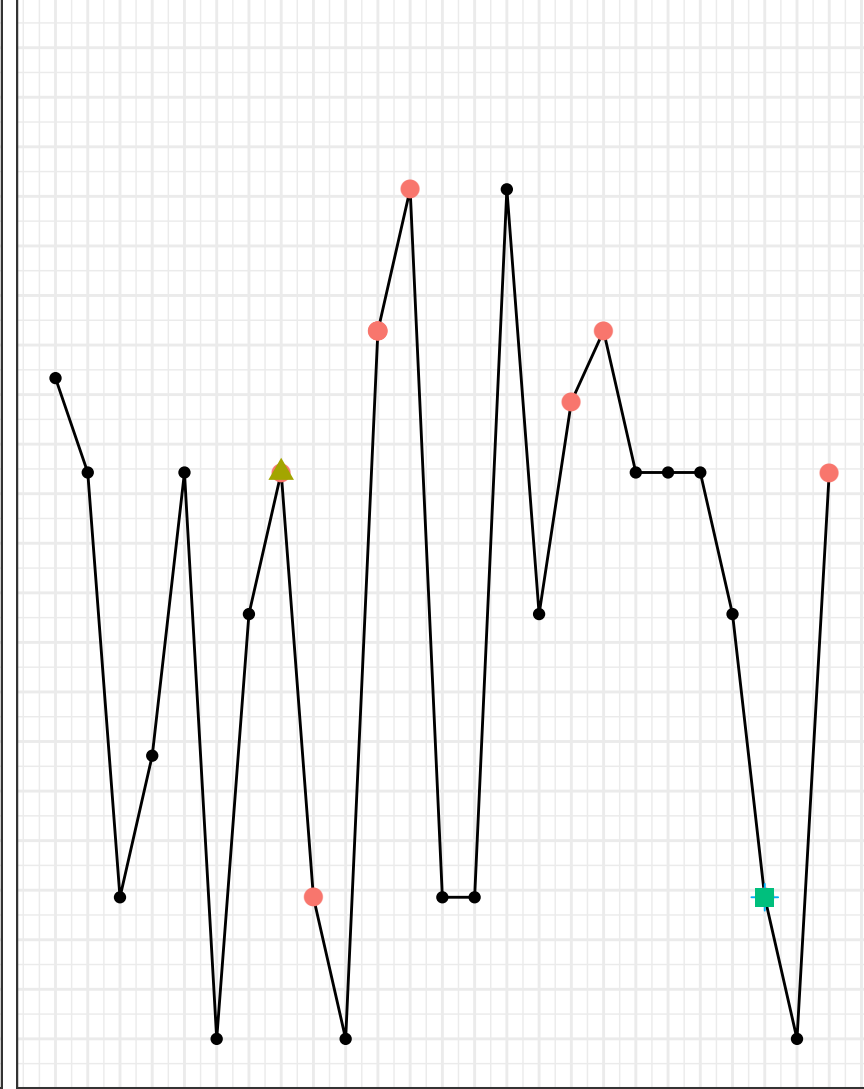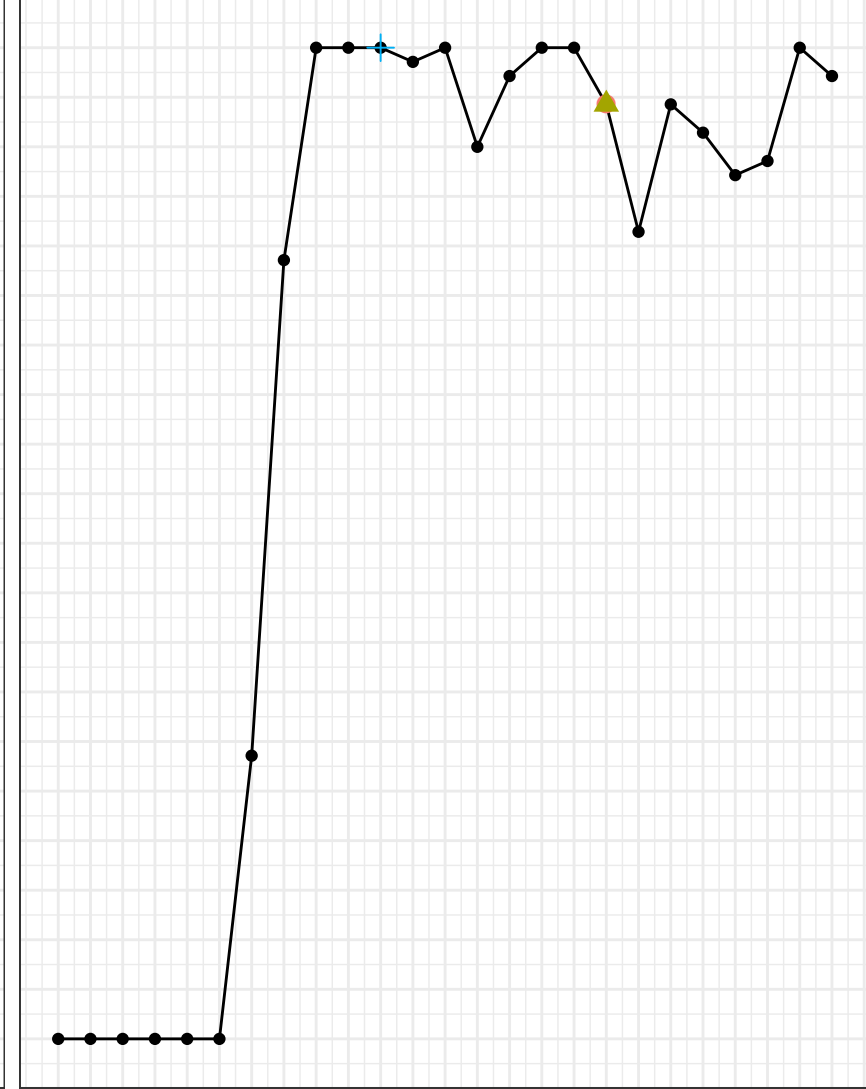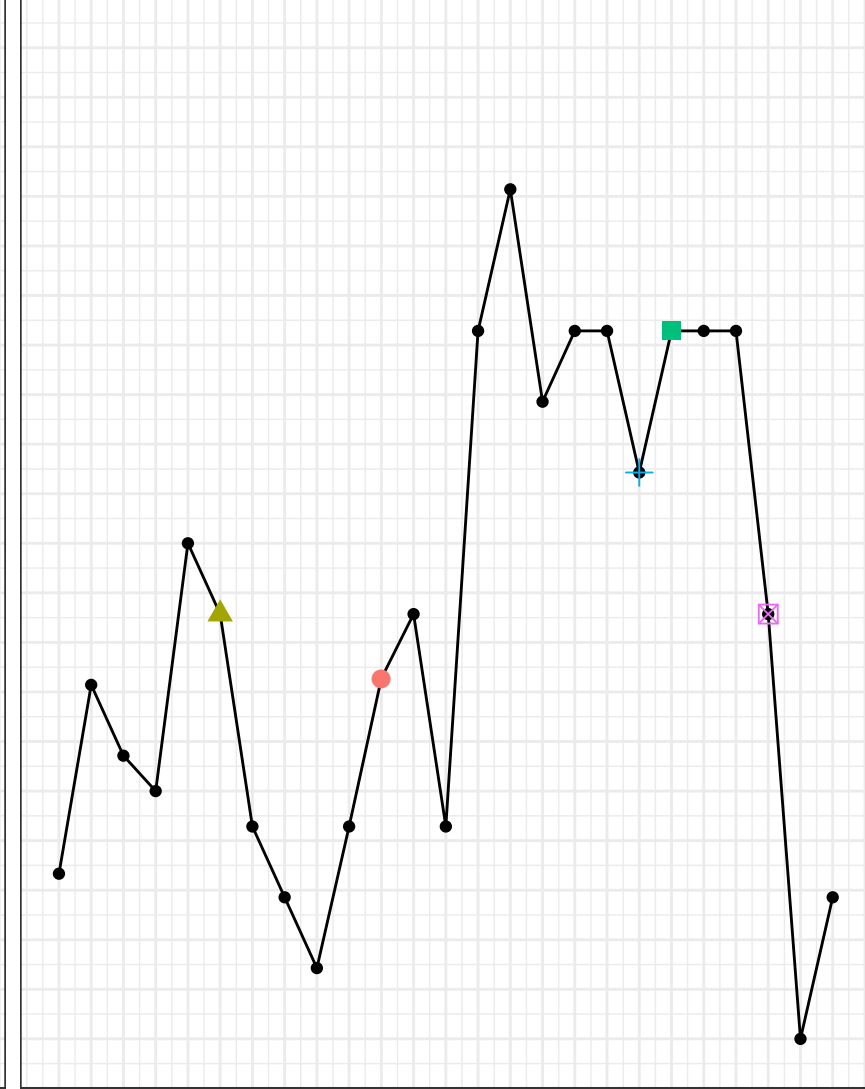

R01/40  
motiv: 7(0)  
conf: 5(1)  
BMQn: 2.4(0.6)  
BMQc: 1.4(-0.2)  
CHAOS: 9(0)

R01/42  
motiv: 5(-1)  
conf: 4(0)  
BMQn: 3(-0.3)  
BMQc: 2.4(-0.1)  
CHAOS: 7(5)

38  
39  
40  
41  
42  
43  
44

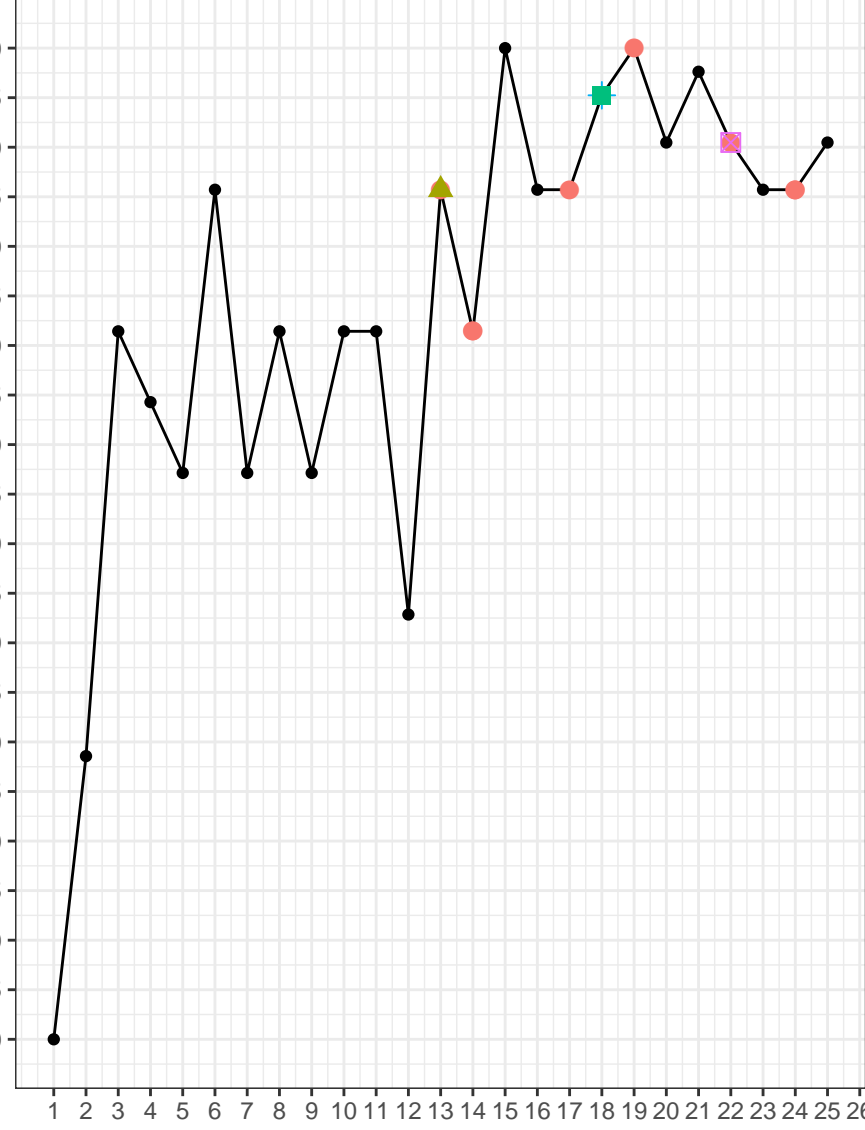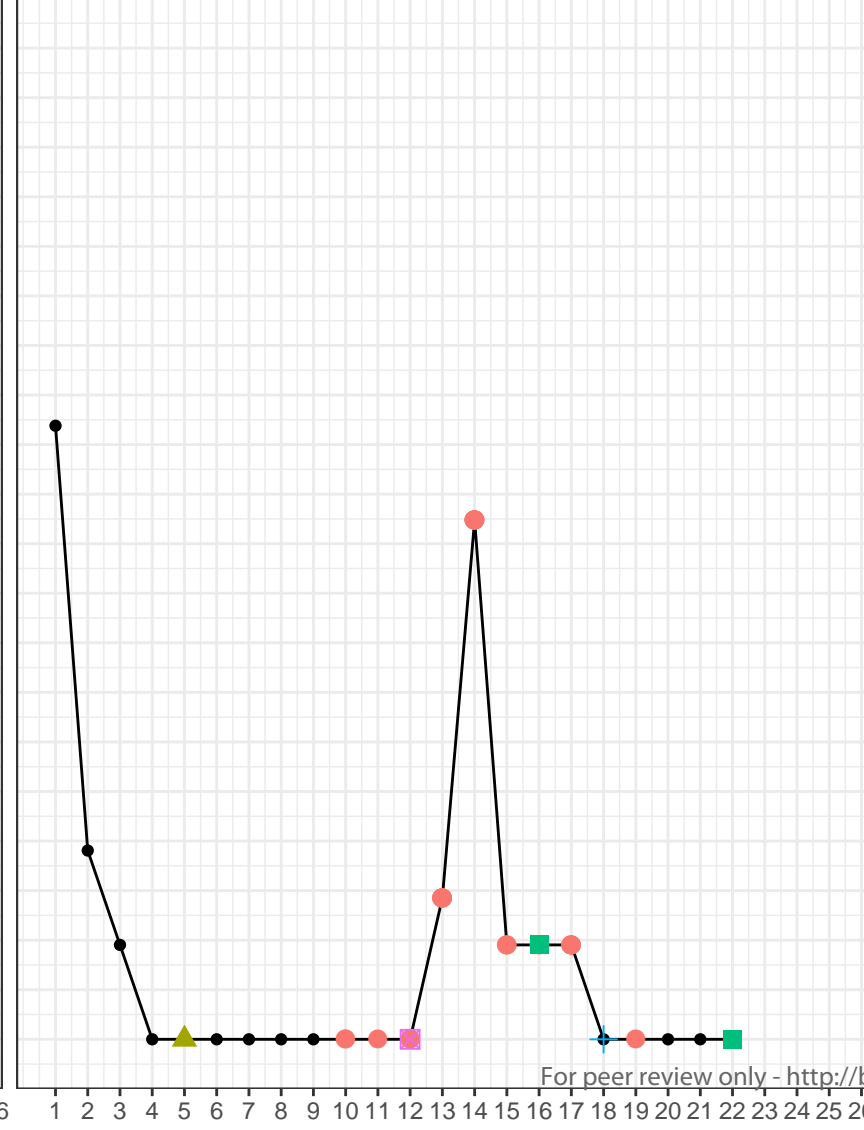

Study Event

- CFHH session
- ▲ Intervention
- Review
- + Preparation
- ⊠ Interview
- NA

*ACtiF*

  
**National Institute for  
 Health Research**

Sheffield Teaching Hospitals   
 NHS Foundation Trust

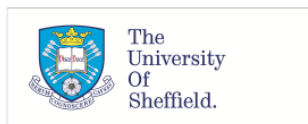

Clinical  
 Trials  
 Research  
 Unit.

**Sheffield  
 Hallam  
 University**

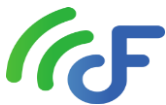

# Development and evaluation of an intervention to support Adherence to treatment in adults with Cystic Fibrosis

**A feasibility study comprised of an  
 external pilot randomised controlled trial  
 and process evaluation**

## RESEARCH PROTOCOL

V3.1 16Nov16

**Sheffield CTRU** J13-002

**IRAS** 199775

**ISRCTN** ISRCTN13076797

**Authorised by:** Martin Wildman

Alicia O'Cathain

## Funding

This project was funded by the Programme Grants for Applied Research programme (RP-PG-1212-20015) and will be published in full in the NIHR Journals Library. This research presents independent research commissioned by the NIHR. The views and opinions expressed by authors in this publication are those of the authors and do not necessarily reflect those of the NHS, the NIHR, MRC, CCF, NETSCC, the Health Technology Assessment programme or the Department of Health.

## Roles and responsibilities

### Names, affiliations, and roles of protocol contributors

The following all contributed to drafting elements throughout the protocol: Martin Wildman, Consultant Respiratory Medic; Marlene Hutchings, Physiotherapist (Sheffield Teaching Hospitals NHS Foundation Trust); Madelynne Arden, Professor of Health Psychology (Sheffield Hallam University); Alicia O’Cathain, Professor of Health Services Research; Sarah Drabble, Research Associate, Stephen Walters (Professor of Medical Statistics and Clinical Trials); Paul Tappenden, Reader in Health Economics; Daniel Beever, Research Associate and Patient Representative; Pauline Wheelan mHealth Applications Manager (University of Manchester); Judy Bradley, Professor of Physiotherapy and Health Services Research; Hannah Cantrill (Research Associate); Chin Maguire (Study Manager); and, Daniel Hind, Assistant Director, Sheffield Clinical Trials Research Unit (University of Sheffield). MW and MA are guarantors of the intervention description; SW is the guarantor of the statistical design and analysis plan; DH is the guarantor of other elements of the pilot trial; AO’C is guarantor for the qualitative research components.

### Sponsor

Sheffield Teaching Hospitals NHS Foundation Trust  
D Floor  
Clinical Research Office  
Royal Hallamshire Hospital  
Glossop Road  
Sheffield  
S10 2JF  
Tel: (0114) 2256424  
Fax: (0114)

### Role of study sponsor and funders

Neither the funder nor the sponsor have had any role in study design, data collection and analysis, decision to publish, or preparation of manuscripts.

## Key Contacts

### Study Manager

Chin Maguire  
 Clinical Trials Research Unit  
 The University of Sheffield  
 School of Health and Related Research  
 30 Regent Street  
 Sheffield  
 Sheffield  
 S1 4DA  
 Tel: (0114) 222 0717  
 Fax: (0114) 222 0870  
 e-mail: [c.maguire@sheffield.ac.uk](mailto:c.maguire@sheffield.ac.uk)

### Chief Investigator

Dr Martin Wildman  
 Adult CF Centre  
 Northern General Hospital  
 Herries Road  
 Sheffield  
 S5 7AU  
 Tel: (0114) 2715212  
 Fax: (0114) 222 0870  
 e-mail: [Martin.Wildman@sth.nhs.uk](mailto:Martin.Wildman@sth.nhs.uk)

## Composition, roles, and responsibilities

### Project Management Group

| Name                       | Role                              | Institution                                          |
|----------------------------|-----------------------------------|------------------------------------------------------|
| Dr Martin Wildman          | Chief Investigator                | Sheffield Teaching Hospitals<br>NHS Foundation Trust |
| Professor Alicia O'Cathain | Chief Investigator                | University of Sheffield                              |
| Dr Daniel Hind             | CTRU Assistant Director           | University of Sheffield                              |
| Chin Maguire               | Study Manager                     | University of Sheffield                              |
| Hannah Cantrill            | Research Assistant                | University of Sheffield                              |
| Helen Wakefield            | Trial Support Office              | University of Sheffield                              |
| Dan Beever                 | PPI Lead                          | University of Sheffield                              |
| Dr Sarah Drabble           | Qualitative Researcher            | University of Sheffield                              |
| Professor Maddy Arden      | Professor of Health<br>Psychology | Sheffield Hallam University                          |
| Marlene Hutchings          | Research Physiotherapist          | Sheffield Teaching Hospitals<br>NHS Foundation Trust |
| Professor Judy Bradley     | Professor in Physiotherapy        | Queens University Belfast                            |



## Independent Project Steering Committee

| <b>Name</b>                | <b>Role</b>                    | <b>Institution</b>                                    |
|----------------------------|--------------------------------|-------------------------------------------------------|
| Professor Kathy Rowan      | Independent Chair              | London School of Hygiene and Tropical Medicine        |
| Professor Sarah Garner     | Independent member             | The National Institute for Health and Care Excellence |
| Professor David Torgerson  | Independent Member             | University of York                                    |
| Dr Lisa Hampson            | Independent Statistician       | Lancaster University                                  |
| Dominic Kavanagh           | PPI Representative             |                                                       |
| Dr Martin Wildman          | Chief Investigator             | Sheffield Teaching Hospitals<br>NHS Foundation Trust  |
| Professor Alicia O'Cathain | Chief Investigator             | University of Sheffield                               |
| Dr Daniel Hind             | CTRU Assistant Director        | University of Sheffield                               |
| Chin Maguire               | Study Manager                  | University of Sheffield                               |
| Professor Maddy Arden      | Professor of Health Psychology | Sheffield Hallam University                           |

## Contents

|                                                                           |    |
|---------------------------------------------------------------------------|----|
| Funding .....                                                             | 2  |
| Names, affiliations, and roles of protocol contributors .....             | 2  |
| Sponsor .....                                                             | 2  |
| Role of study sponsor and funders.....                                    | 2  |
| Composition, roles, and responsibilities .....                            | 3  |
| Project Management Group .....                                            | 3  |
| Independent Project Steering Committee .....                              | 4  |
| Contents .....                                                            | 5  |
| Figures .....                                                             | 7  |
| Tables.....                                                               | 7  |
| 1. Lay summary .....                                                      | 8  |
| 2. Introduction.....                                                      | 9  |
| 2.1 Background.....                                                       | 9  |
| 2.2 Rationale .....                                                       | 9  |
| 3. Aim and objectives .....                                               | 11 |
| 3.1 Aims.....                                                             | 11 |
| 3.2 Objectives .....                                                      | 11 |
| 4. Design .....                                                           | 12 |
| 5. Participants and study settings.....                                   | 13 |
| 5.1 Settings and locations where the data will be collected.....          | 13 |
| 5.2 Eligibility .....                                                     | 13 |
| 5.2.1 Inclusion criteria for participants.....                            | 13 |
| 5.2.2 Exclusion criteria for participants.....                            | 13 |
| 5.2.3 Eligibility criteria for study centres .....                        | 13 |
| 5.2.4 Eligibility criteria for interventionists.....                      | 13 |
| 6. Interventions .....                                                    | 14 |
| 6.1 Summary.....                                                          | 14 |
| 6.2 Microchipped devices .....                                            | 15 |
| 6.2.1 The eTrack nebuliser system (Pari GmbH) .....                       | 15 |
| 6.2.2 The Bi-neb AAD System from (Philips Healthcare).....                | 15 |
| 6.3 Information technology infrastructure .....                           | 15 |
| 6.3.1 The Qualcomm hub .....                                              | 15 |
| 6.3.2 CFHealthHub .....                                                   | 15 |
| 6.3.3 The Bi-Neb data transfer system .....                               | 16 |
| 6.4 The Behaviour Change Intervention (BCI) .....                         | 17 |
| 6.4.1 Rationale and theory .....                                          | 17 |
| 6.4.2 Intervention providers.....                                         | 22 |
| 6.4.3 Materials .....                                                     | 22 |
| 6.4.4 Procedures.....                                                     | 22 |
| 6.5 Usual care .....                                                      | 27 |
| 6.6 Criteria for discontinuing or modifying allocated interventions ..... | 27 |
| 6.7 Strategies to improve adherence to intervention protocols.....        | 28 |
| 6.7.1 For health professionals .....                                      | 28 |
| 6.7.2 For patients .....                                                  | 28 |
| 6.8 Relevant permitted / prohibited concomitant care .....                | 28 |
| 7. Outcomes .....                                                         | 29 |
| 7.1 Feasibility outcomes (‘stop-go’ or ‘success’ criteria for RCT).....   | 29 |
| 7.2 Process data relating to the implementation of the trial.....         | 29 |

|    |                                                                          |    |
|----|--------------------------------------------------------------------------|----|
| 1  |                                                                          |    |
| 2  |                                                                          |    |
| 3  | 7.3 Process data relating to the implementation of the intervention..... | 30 |
| 4  | 7.4 Clinical outcomes and covariates .....                               | 31 |
| 5  | 7.4.1 Primary clinical outcome .....                                     | 31 |
| 6  | 7.4.2 Secondary clinical outcomes .....                                  | 32 |
| 7  | 7.4.3 Adherence to prescribed medication.....                            | 33 |
| 8  | 8. Sampling .....                                                        | 37 |
| 9  | 8.1 Quantitative components .....                                        | 37 |
| 10 | 8.1.1 Sites.....                                                         | 37 |
| 11 | 8.1.2 Sample size .....                                                  | 37 |
| 12 | 8.1.3 Approach, non-participation and recruitment.....                   | 37 |
| 13 | 8.2 Qualitative components .....                                         | 38 |
| 14 | 9. Assignment of interventions .....                                     | 38 |
| 15 | 9.1 Sequence generation .....                                            | 38 |
| 16 | 9.2 Allocation concealment .....                                         | 38 |
| 17 | 9.3 Implementation .....                                                 | 38 |
| 18 | 9.4 Blinding .....                                                       | 38 |
| 19 | 10. Data collection, management and analysis .....                       | 39 |
| 20 | 10.1 Quantitative data .....                                             | 39 |
| 21 | 10.1.1 Data collection methods.....                                      | 39 |
| 22 | 10.1.2 Data Management .....                                             | 40 |
| 23 | 10.1.3 Data quality assurance .....                                      | 40 |
| 24 | 10.2 Qualitative data .....                                              | 41 |
| 25 | 10.2.1 Audio recordings of consultations .....                           | 41 |
| 26 | 10.2.2 Semi-structured interviews: participants .....                    | 41 |
| 27 | 10.2.3 Semi-structured interviews: professionals .....                   | 41 |
| 28 | 10.2.4 Undertaking the interviews .....                                  | 41 |
| 29 | 11. Data analysis .....                                                  | 42 |
| 30 | 11.1 Quantitative analysis.....                                          | 42 |
| 31 | 11.2 Qualitative analysis.....                                           | 43 |
| 32 | 11.3 Combining data and findings from the different components .....     | 44 |
| 33 | 12. Monitoring .....                                                     | 44 |
| 34 | 12.1 Oversight.....                                                      | 44 |
| 35 | 12.2 Description of any interim analyses and stopping guidelines.....    | 45 |
| 36 | 12.3 Harms (safety assessments) .....                                    | 45 |
| 37 | 12.3.1 Serious Adverse Events .....                                      | 45 |
| 38 | 12.3.2 Adverse events we require reporting: .....                        | 46 |
| 39 | 12.3.3 Expected SAEs and adverse events .....                            | 46 |
| 40 | 12.3.4 Reporting .....                                                   | 47 |
| 41 | 12.4 Auditing .....                                                      | 47 |
| 42 | 12.5 Finance and indemnity.....                                          | 47 |
| 43 | 13. Ethics and dissemination .....                                       | 48 |
| 44 | 13.1 Approvals.....                                                      | 48 |
| 45 | 13.2 Protocol amendments.....                                            | 48 |
| 46 | 13.3 Consent .....                                                       | 48 |
| 47 | 13.4 Confidentiality .....                                               | 49 |
| 48 | 13.5 Declaration of Interests .....                                      | 49 |
| 49 | 13.6 Access to data .....                                                | 49 |
| 50 | 13.7 Ancilliary and post-trial care .....                                | 49 |
| 51 | 13.8 Dissemination policy .....                                          | 49 |
| 52 | References.....                                                          | 51 |
| 53 | Appendix 1. W.H.O. Trial Registration Data Set .....                     | 56 |
| 54 |                                                                          |    |
| 55 |                                                                          |    |
| 56 |                                                                          |    |
| 57 |                                                                          |    |
| 58 |                                                                          |    |
| 59 |                                                                          |    |
| 60 |                                                                          |    |

1  
2  
3  
4  
5  
6  
7  
8  
9  
10  
11  
12  
13  
14  
15  
16  
17  
18  
19  
20  
21  
22  
23  
24  
25  
26  
27  
28  
29  
30  
31  
32  
33  
34  
35  
36  
37  
38  
39  
40  
41  
42  
43  
44  
45  
46  
47  
48  
49  
50  
51  
52  
53  
54  
55  
56  
57  
58  
59  
60

**Figures**

Figure 1. Interaction between complex intervention components .....14  
 Figure 2. Interactions between capability, opportunity and motivation .....17  
 Figure 3. Habit formation incorporating COM-B and necessities and concerns.....18  
 Figure 4. Interplay between COM-B components during habit formation.....18  
 Figure 5. Behaviour change intervention flow chart .....26  
 Figure 6. Participant timeline for the external pilot RCT .....36  
 Figure 7. Assumptions of the MRC Guidance on Process Evaluation .....43

**Tables**

Table 1. Learning objectives of the CFHealthHub modules .....16  
 Table 2: Intervention modules .....20  
 Table 3. Individual-level data derived from PWCF and sites.....34  
 Table 4. CFHealthHub data (research arm only) .....35

## 1. Lay summary

Cystic Fibrosis (CF) is an inherited disease affecting 10000 people in the UK with an average age at death of 28 years in 2012. The lungs of people with CF (PWCF) are prone to infections. Daily physiotherapy and inhaled medications are needed to stay healthy. Around £30 million is spent annually on inhaled therapy but average adherence has been shown to be only 36%. Data suggest that adherence is better in younger children (71% in under 12s, falling to 50% in teenagers) but of the 10000 UK PWCF almost 6000 are now adults. PWCF who collect <50% of their medication cost the healthcare system significantly more than PWCF who collect more than 80% and most of the additional cost results from unscheduled emergency care and hospital admission. This unscheduled emergency care is distressing for PWCF and their families.

We have designed an intervention to help adult PWCF see how much treatment they use. We use dose-counting nebulisers to collect data and send it to a website where it can be displayed. We have worked with PWCF to make the information easy to understand. The website has modules which teach PWCF how to build successful treatment habits. We have developed a toolkit to help PWCF and a health professional (interventionist) work together to form habits of adherence to treatment.

The NHS should not fund this intervention without its effectiveness and value for money being evaluated in a Randomised Controlled Trial (RCT). However, there is currently insufficient information to effectively plan or justify funding a RCT on the scale required. This feasibility study is an essential preliminary to the full scale RCT. The purpose of this feasibility study is to see whether the proposed procedures for the full scale RCT are feasible and acceptable to PWCF. It will also tell us whether the intervention can be delivered by health professionals and is acceptable to PWCF, outside the NHS trust where it was developed.

We will recruit PWCF for four months at two CF units. We hope we will recruit 64 PWCF overall, but will deem the full scale RCT feasible if we recruit 48. A computer will decide whether people who consent to be in the study will receive usual care alone or also receive the intervention. Both groups have a short period of two to four weeks when data is collected through their nebulisers and fed back to the website. It is only after that period that those allocated to the intervention are allowed to use the website and receive enhanced care from the interventionist. After that point, all participants are followed up for 5 (+/-) months. Participants will complete a series of questionnaires at the outset and at 5 (+/-) months.

With appropriate consent, the interventionist or member of the multidisciplinary team (MDT) will audio record consultations between themselves and PWCF who are receiving the intervention or usual care. Qualitative researchers will conduct: 20-24 interviews with PWCF receiving the intervention; 20-24 interviews with PWCF receiving usual care; eight interviews with the four health professionals who are delivering the intervention; and eight semi-structured interviews with members of the wider MDT. These interviews are intended to help the team understand and mitigate potential sources of failure in the intervention and the proposed full-scale trial.

## 2. Introduction

### 2.1 Background

Cystic Fibrosis (CF) is a long term condition (LTC) in which poor adherence to high cost drugs shortens lives and increases NHS costs. CF is a LTC affecting 10,000 people in the UK with PWCF typically dying from lung damage at a median age of 28 years [1]. Randomised controlled trials show that preventative medications reduce exacerbations and/or preserve lung function, [2–8] however adherence is poor. A recent review of objective measures of adherence using medicine possession ratios (MPR: prescriptions collected over prescriptions issued) and instrumented medication monitors showed adherence ranging from 67% for oral antibiotics, 31-53% for inhaled antibiotics, 53-79% for mucolytics agents and 41-72% for hypertonic saline [9]. Accumulating evidence suggests poor adherence is associated with poor outcomes. PWCF collecting four or more courses of alternate month nebulised tobramycin per year were 60% less likely to be admitted to hospital than PWCF collecting one or less [10]. Lower composite MPR predicted exacerbations requiring intravenous antibiotics (IVAB) [9] and over a 12 month period PWCF with an MPR of 80% had significantly lower total healthcare costs than PWCF with an MPR <50% with a cost difference \$14,211 per patient and most excess costs related to hospital care [11]. Rescue therapy with IVAB can cause renal failure [12]. The total 2012 UK spend for CF was estimated to be £100 million of which £30 million was spent on inhaled antibiotics and mucolytics [13]. Although patient self-reported adherence to inhaled therapy was 80%, objective measurement showed median adherence was only 36% and the clinicians were unable to predict which PWCF were able to successfully adhere [14] making adherence support difficult. In 2012, the UK CF population received 171,907 days of IVAB with the 93,455 of these that occurred in hospital costing an estimated £27 million [15]. It is recommended that adherence interventions should be targeted where adherence really matters [16] and targeting support towards the high cost inhaled preventative drugs in CF (median adherence 36%) has the potential to impact on the 171,907 days of IVAB a proportion of which will represent rescue therapy necessitated by failed prevention.

### 2.2 Rationale

The National Institute for Health Research have commissioned a Programme Grant for Applied Research to systematically develop and evaluate an adherence intervention for PWCF. The Programme Grant has three work packages

Work package 1: Build IT infrastructure to capture adherence data from nebulisers. Co-produce a web-portal, 'CFHealthHub', with PWCF and clinicians, in order to display routinely collected adherence data for the use of both groups.

Work package 2: Develop a toolkit based on psychological theory that can support PWCF to adhere to treatment. This will include feedback of measured adherence data and personalised interventions to increase adherence delivered through CFHealthHub. Manualise a Behaviour Change Intervention (BCI) for use by health professionals and PWCF.

All four work packages have received a favourable opinion from an NHS REC:

- Work package 2.1A: A study of the views of people with cystic fibrosis about their condition and treatments (Hampshire A REC: 14/SC/1455; IRAS: 171049);

- 1  
2  
3  
4  
5  
6  
7  
8  
9  
10  
11  
12  
13  
14  
15  
16
- Work package 2.1C: A study to produce videos for the CFHealthHub website (Camden & Kings Cross REC: 15/LO/0944; IRAS: 182367);
  - Work package 2.2B: A study to develop a Behaviour Change Intervention (BCI) to help patients with CF manage treatment adherence ((South Yorkshire REC: 15/YH/0332; IRAS: 184477); and,
  - Work package 2.2B(1): A study to understand how to use the eTrack and Bi-neb nebuliser to help people with CF to manage their inhalation treatments (West of Scotland REC 5: 15/WS/0089; IRAS: 177900).

17  
18  
19  
20  
21  
22  
23

Work package 3: Evaluate the toolkit developed in work package 2. The planned definitive evaluation will take place in a large-scale, multi-centre Randomised Controlled Trial (RCT). The definitive evaluation will compare usual care plus staff training in the importance of knowledge, skills and confidence building for adherence versus the same plus the structured behaviour change in intervention (CFHealthHub plus manual).

24  
25  
26

There is too little information available to effectively plan or justify funding a full scale RCT. We wish to conduct feasibility study comprising of:

- 27  
28  
29  
30  
31  
32  
33  
34  
35  
36  
37  
38  
39  
40  
41  
42  
43  
44  
45  
46  
47  
48  
49  
50  
51  
52  
53  
54  
55  
56  
57  
58  
59  
60
- an ‘external pilot RCT’ to establish the feasibility of recruitment to a larger, definitive study; and,
  - a ‘process evaluation’ which will help us understand the strengths and weaknesses of both the intervention and research protocols, and ways of addressing any weaknesses.

### 3. Aim and objectives

#### 3.1 Aims

The principal aims of this feasibility study are to assess the feasibility and acceptability of:

- a complex intervention, when delivered outside the team which conceived and developed it; and,
- procedures for a full-scale RCT.

#### 3.2 Objectives

1. An external pilot randomised controlled trial to determine feasibility of a randomised controlled trial based on objective stop-go criteria (Section 7.1) related to:

- (a) participant recruitment;
- (b) participant retention; and,
- (c) quality of primary outcome data at 5(+/- 1) month.

2. A process evaluation, relating quantitative and qualitative data on procedures to outcomes, in order to understand and mitigate potential sources of failure in:

- (a) the intervention; and,
- (b) the full trial.



## 4. Design

Mixed-methods study comprising of:

- Quantitative component: parallel group, open labelled, external pilot RCT;
- and,
- Qualitative component: analysis of audio-recorded consultations and interviews.

Quantitative and qualitative data will contribute to the process evaluation.

## 5. Participants and study settings

### 5.1 Settings and locations where the data will be collected

Nebuliser adherence data and information derived from CFHealthHub will be automatically uploaded by participants nebulisers in their own home. Data collection involving patient notes and patient reported outcome measures will take place in two specialist CF units which have not been involved in the development of the intervention. Exacerbation data will be collected by the ACtiF trial interventionist and clinicians at sites from participant notes.

### 5.2 Eligibility

#### 5.2.1 Inclusion criteria for participants

1. Diagnosed with CF and with data within the CF registry
2. Aged 16 years and above
3. Taking inhaled mucolytics or antibiotics via a chipped nebuliser (e.g. eTrack or Bi-Neb) or able and willing to take via eTrack or Bi-Neb.

#### 5.2.2 Exclusion criteria for participants

1. Post-lung transplant
2. People on the active lung transplant list
3. Patients receiving palliative care, Lacking in capacity to give informed consent
4. Using dry powder devices to take antibiotics or mucolytics

#### 5.2.3 Eligibility criteria for study centres

1. Adult CF Centre;
2. Recognised by commissioners
3. Receiving year-of-care funding

#### 5.2.4 Eligibility criteria for interventionists

1. Health care professional e.g. registered nurse, physiotherapist or other appropriately skilled individual such as a psychology graduate able to work at NHS Agenda for Change Band - 4 or above

## 6. Interventions

### 6.1 Summary

In the external pilot RCT, we will test procedures for a full trial. This involves allocation of PWCF to either a complex intervention or usual care. A ‘complex intervention’ is defined as one with several interacting components [17]. The complex intervention under evaluation has three broad categories of components (Figure 1):

(a) *a microchipped device* (nebuliser) for delivering inhaled medications, which are routinely prescribed for the control of cystic fibrosis (Section 6.2);

(b) *information technology infrastructure* to capture and store adherence data from the nebulisers and display it to PWCF and the CF team (Section 6.3); and,

(c) *the behaviour change intervention*, comprising a software platform (‘CFHealthHub’ mobile apps and website) offering adherence feedback and tailored modules of content and tools used by the health professional in interactions with PWCF (Section 6.4) and accessed independently by PWCF via CFHealthHub

Services received as usual care described in Section 6.5.

**Figure 1. Interaction between complex intervention components**

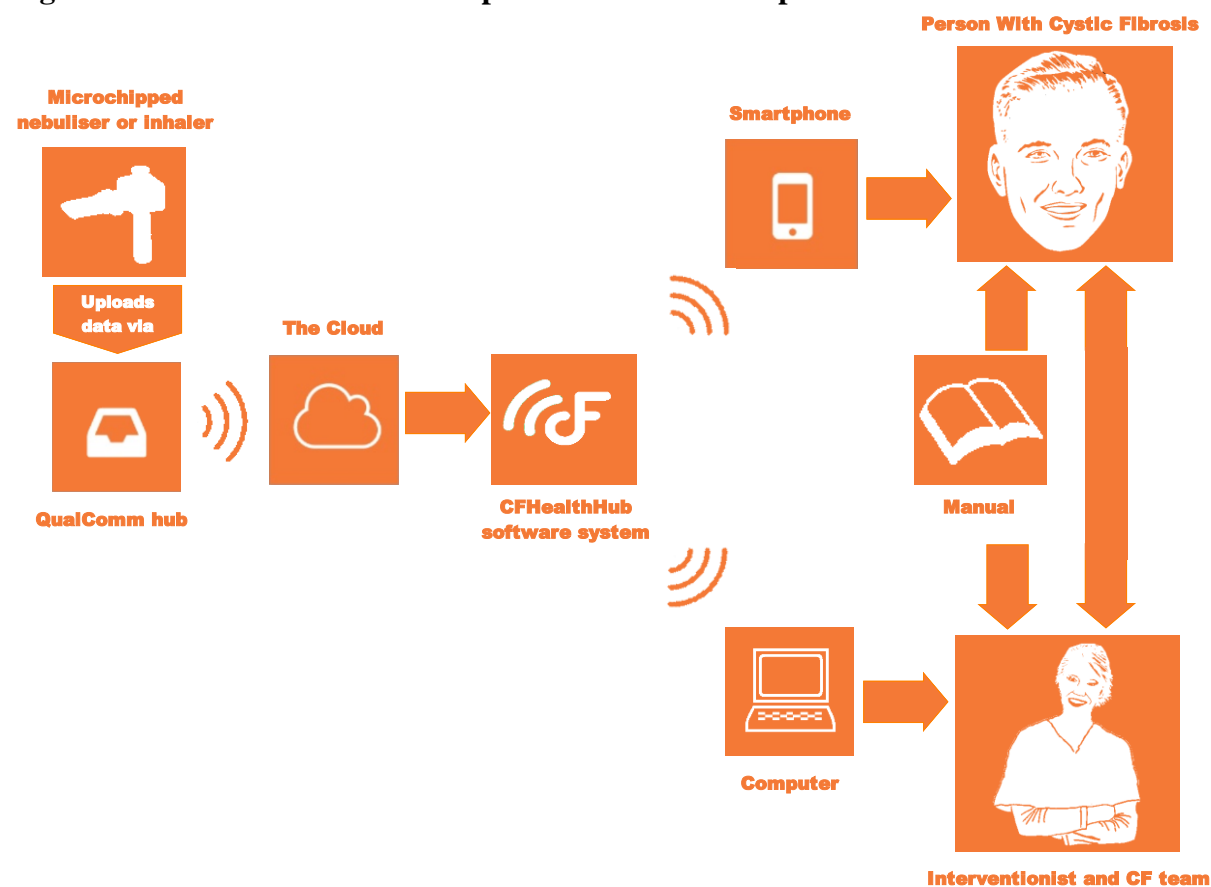

## 6.2 Microchipped devices

Depending on treatment strategies at different centres the participant may use an eTrack nebuliser system (Section 6.2.1), an Bi-neb AAD System from (Section 6.2.2).

### 6.2.1 The eTrack nebuliser system (Pari GmbH)

The eTrack controller is a modified version of the eBase controller and can be used to operate both the eFlow rapid nebulizer or Altera nebulizer. Compared to the eBase controller the eTrack is equipped with a Bluetooth chip and has a monitoring function to allow the capture of inhalation adherence data. The eFlow rapid nebuliser with eTrack controller is a CE marked medical device to be used for inhalation therapy. The device allows medications (approved for inhalation) to be transported deep into the lungs.

### 6.2.2 The Bi-neb AAD System from (Philips Healthcare)

The Bi-neb AAD system is a CE marked medical device which is intended for use to deliver aerosolised liquid medications for participants with cystic fibrosis. The drug delivery device is small and battery powered designed to deliver a precise dose of drug into patient's lungs. The Bi-neb AAD system is designed to deliver liquid medications that are specifically approved for use with the Bi-neb AAD System.

## 6.3 Information technology infrastructure

The information technology infrastructure for the complex intervention comprises:

- i. The Qualcomm hub (Section 6.3.1)
- ii. CFHealthHub (Section 6.3.2).
- iii. The Bi-Neb data transfer system (6.3.3)

### 6.3.1 The Qualcomm hub

The Qualcomm hub (Qualcomm; Cambridge, UK) is a wireless device which acquires data from the chipped device and transmits it to a cloud-based data centre. It is a Class I MDD and CE registered in Europe. It is designed, developed and manufactured in accordance with a quality system compliant with ISO13485 standards, meaning it aligns with the quality requirements of international regulatory agencies in the health care industry.

### 6.3.2 CFHealthHub

CFHealthHub is a web-portal which displays adherence data and provides resources and tools to people with cystic fibrosis and health professionals in order to support improved nebuliser adherence. It is available on-line via computers, tablets or mobile phones.

A qualitative study (WP 2.1A) to identify the barriers and facilitators of nebuliser use in PWCF informed the development of an intervention designed to increase nebuliser adherence. Analysis of the interview data was conducted using the COM-B framework, and these findings were used to inform the development of a complex intervention centred around the feedback of objective adherence data. The intervention was further developed and refined in consultation with PWCF and clinicians. An iterative study in which prototype versions of the intervention were delivered to and reviewed by PWCF was conducted. In that iterative study we interviewed PWCF and interventionists about the usability and tailoring of the

intervention, and made improvements to the process and materials based on this feedback. The system has been developed to ensure it meets the requirements of the Data Protection Act 1998. It is intended that data on maintenance and relapse will be generated during the full scale trial.

CFHealthHub has a number of modules addressing barriers to adherence based on the COM-B system described in greater detail in Section 6.4.1. The objectives of the modules as mapped to the COM-B are outlined in Table 1 below.

**Table 1. Learning objectives of the CFHealthHub modules**

| COM-B model component    | Objectives                                                                                                                                                                                                         |
|--------------------------|--------------------------------------------------------------------------------------------------------------------------------------------------------------------------------------------------------------------|
| Physical capability      | - Have the skills to be able to use the nebuliser correctly                                                                                                                                                        |
| Psychological capability | - Understand the importance of nebuliser use in CF treatment<br>- Be able to remember to use nebuliser<br>- Be able to self-monitor nebuliser use<br>- Be aware of a need to improve nebuliser use                 |
| Physical opportunity     | - Have a realistic medication plan<br>- Have a working/functioning nebuliser<br>- Have a suitable place to use nebuliser<br>- Have the time to use nebuliser                                                       |
| Social opportunity       | - Be/feel supported by others to use nebuliser                                                                                                                                                                     |
| Reflective motivation    | - Perceive benefits of nebuliser use<br>- Perceive few/no concerns about nebuliser use<br>- Understand the health consequences of use/non-use<br>- Feel confident about nebuliser use<br>- Intend to use nebuliser |
| Automatic motivation     | - Have an established routine for nebuliser use<br>- Have a habit to use nebuliser                                                                                                                                 |

### 6.3.3 The Bi-Neb data transfer system

The Bi-Neb Bluetooth data transfer system is intended to automatically extract breathing device use (adherence data) from the device (Bi-Neb) via a Smartphone hub and a secure data server onto CFHealthHub. Providing the Bi-Neb is within the Bluetooth range within the patient's house, the system can retrieve this data once a day.

## 6.4 The Behaviour Change Intervention (BCI)

### 6.4.1 Rationale and theory

The rationale of the BCI is to help CF patients to self-manage their condition and to form habits that will improve adherence to their medication, thereby extending life and improving quality of life. The MRC framework for developing and evaluating complex interventions recommends that intervention development should be informed by a suitable theoretical framework and evidence base [17]. The theoretical model adopted is the COM-B model [18] which describes a ‘behaviour system’ of the essential and interacting conditions of Capability, Opportunity, and Motivation [18]. The model posits that non-adherence is either non-intentional (a problem of capability or opportunity) or intentional (a problem of motivation). The model has been adapted to nebuliser adherence on the basis of evidence about the factors influencing nebuliser adherence in PWCF [19–32], input from expert clinicians currently delivering services to PWCF, as well as from the PPI panel and exploratory research conducted in Sheffield. It is important that interventions are tailored to individual needs and use a multi-modal approach [33]. Each of the conditions of Capability, Opportunity and Motivation has been considered in turn in the development of our intervention. The primary component of the intervention is adherence feedback delivered via the CFHealthHub. Evidence suggests that while personalised feedback can have an effect size of up to 20% in increasing adherence [34, 35], feedback is most effective when combined with additional behaviour change techniques [34].

**Figure 2. Interactions between capability, opportunity and motivation**

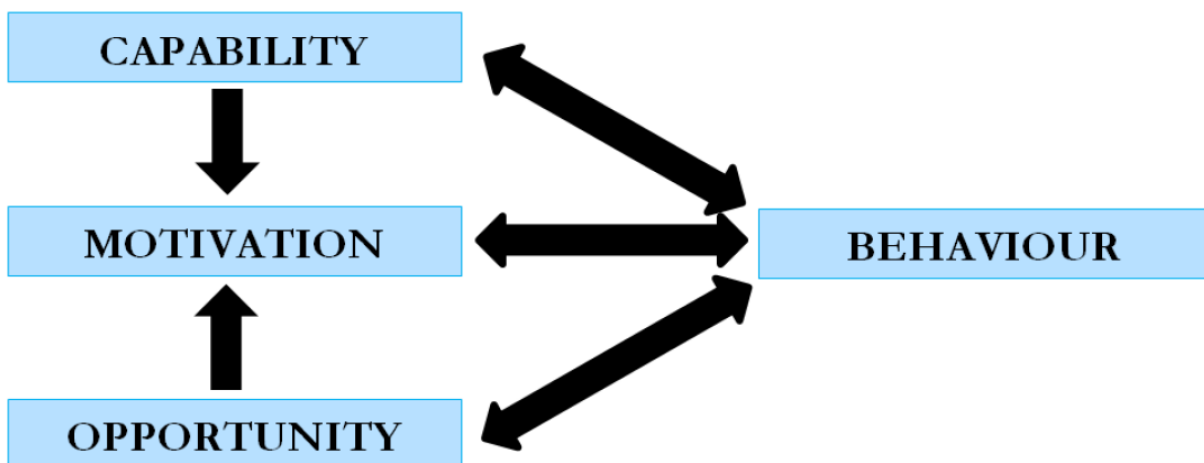

Figure 3. Habit formation incorporating COM-B and necessities and concerns

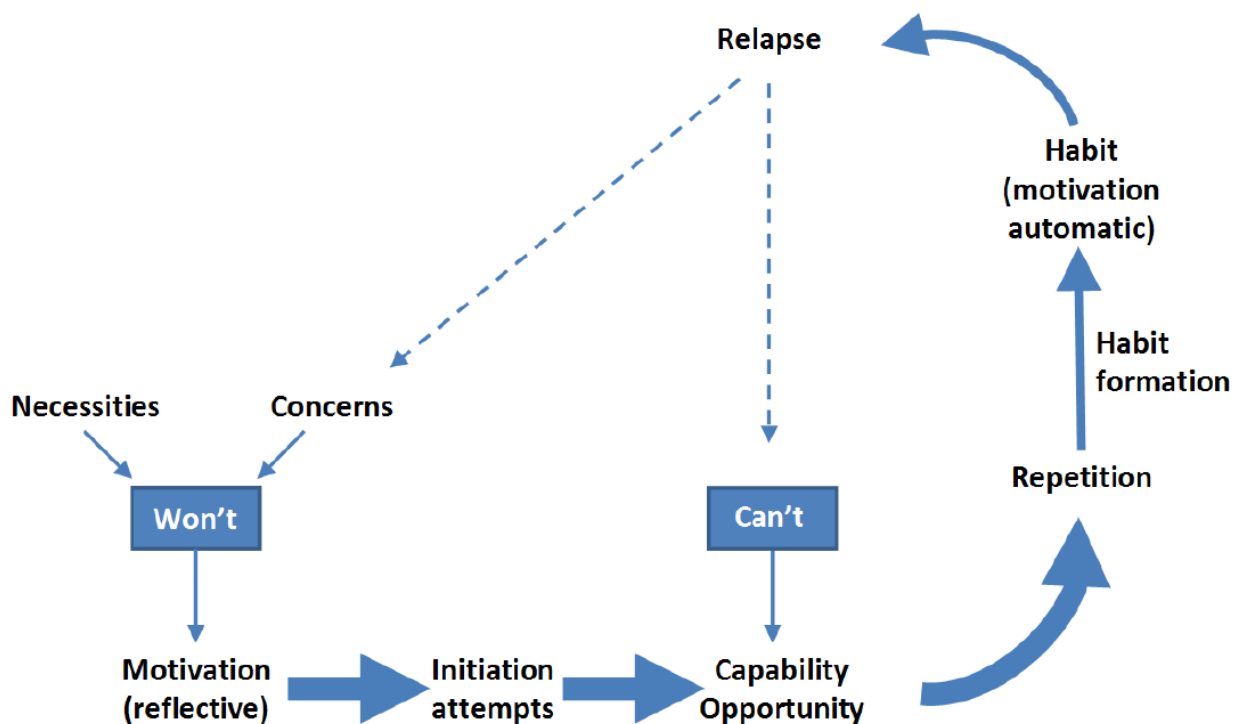

Figure 4. Interplay between COM-B components during habit formation

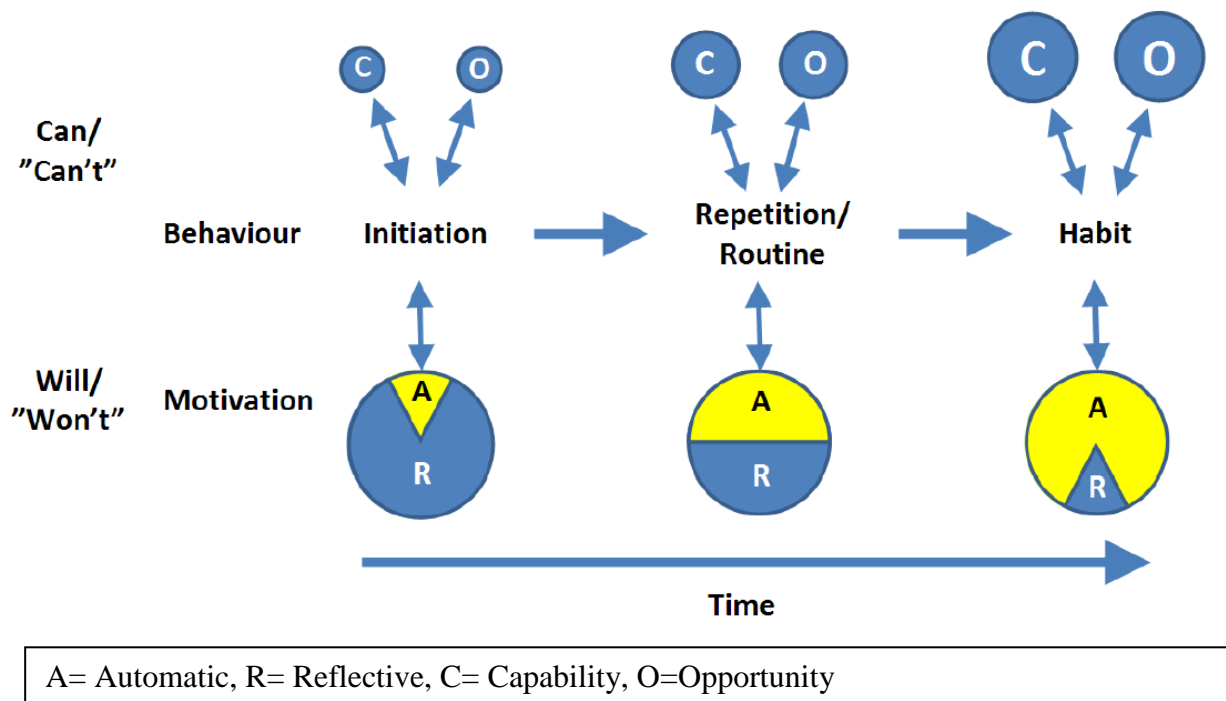

1  
2  
3 The identification and choice of appropriate behaviour change techniques has been driven by  
4 the Behaviour Change Wheel framework for the development of interventions [Michie, S. F.,  
5 Atkins, L., & West, R. (2015). The behaviour change wheel: a guide to designing  
6 interventions.] which outlines a process of intervention design using the COM-B model  
7 "through the systematic evaluation of theory and evidence" (p. 13). In brief, the process  
8 involved the following steps:  
9

- 10  
11 1. In depth identification and analysis of the factors influencing nebuliser adherence in  
12 PWCF through an examination of the existing literature, and a qualitative study in  
13 which participants viewed charts of their objective nebuliser adherence data within an  
14 interview about factors affecting their motivation, capability and opportunity to adhere  
15 to their nebuliser treatment (study 2.1). The Theoretical Domains Framework (TDF;  
16 [36]) which analyses Capability, Opportunity and Motivation in greater detail was  
17 used as a framework to guide the analysis.
- 18  
19 2. Identification and evaluation of potential intervention functions (e.g. education,  
20 persuasion, enablement, environmental restructuring, modelling) to address the  
21 identified factors influencing nebuliser adherence in consultation with the research  
22 team, clinicians and PPI.
- 23  
24 3. Development of intervention modules to include specific Behaviour Change  
25 Techniques to deliver intervention functions, selection of mode of delivery, and  
26 mechanism for tailoring of BCI delivery to meet individual needs with regard to  
27 Capability, Opportunity and Motivation. The module contents have been discussed  
28 and refined as a result of discussions with clinicians and PPI.
- 29  
30 4. Identification of potential mediators of behaviour change, and identification of tools to  
31 measure each mediator.  
32  
33

34 The intervention arrived at through this process is described in Table 2.  
35  
36  
37  
38  
39  
40  
41  
42  
43  
44  
45  
46  
47  
48  
49  
50  
51  
52  
53  
54  
55  
56  
57  
58  
59  
60



**Table 2: Intervention modules**

| Module                                            | COM-B                                                                                          | Intervention functions                                 | Behaviour Change Techniques                                                                                                                                                                                                                      | Mode of Delivery                                                                                                                                                                                                                                          |
|---------------------------------------------------|------------------------------------------------------------------------------------------------|--------------------------------------------------------|--------------------------------------------------------------------------------------------------------------------------------------------------------------------------------------------------------------------------------------------------|-----------------------------------------------------------------------------------------------------------------------------------------------------------------------------------------------------------------------------------------------------------|
| <i><u>Universal parts of the intervention</u></i> |                                                                                                |                                                        |                                                                                                                                                                                                                                                  |                                                                                                                                                                                                                                                           |
| <b>Self-monitoring</b>                            | Psychological capability<br>Reflective Motivation                                              | Education<br>Environmental restructuring<br>Enablement | <ul style="list-style-type: none"> <li>Self-monitoring of behaviour</li> <li>Adding objects to the environment (CFHealthHub)</li> </ul>                                                                                                          | <ul style="list-style-type: none"> <li>Charts of objective adherence data presented within CFHealthHub</li> </ul>                                                                                                                                         |
| <b>Goal setting &amp; review</b>                  | Psychological capability<br>Automatic motivation                                               | Enablement<br>Incentivisation                          | <ul style="list-style-type: none"> <li>Goal setting (behaviour)</li> <li>Feedback on behaviour</li> <li>Discrepancy between current behaviour and goal</li> <li>Review behavioural goals</li> <li>Graded tasks</li> <li>Social reward</li> </ul> | <ul style="list-style-type: none"> <li>Discussion and agreement of goal with interventionist</li> <li>Review of goal</li> <li>Feedback on progress (through CFHealthHub and interventionist)</li> <li>Visual reward if goal met on CFHealthHub</li> </ul> |
| <b>Treatment plan</b>                             | Psychological capability<br>Physical Opportunity<br>Social Opportunity<br>Automatic motivation | Training<br>Environmental restructuring<br>Enablement  | <ul style="list-style-type: none"> <li>Action planning</li> <li>Habit formation</li> <li>Prompts/cues (tailored)</li> </ul>                                                                                                                      | <ul style="list-style-type: none"> <li>Action planning tool within CFHealthHub</li> <li>Option to set reminders</li> </ul>                                                                                                                                |
| <b>Confidence building</b>                        | Reflective Motivation                                                                          | Persuasion                                             | <ul style="list-style-type: none"> <li>Focus on past success</li> </ul>                                                                                                                                                                          | <ul style="list-style-type: none"> <li>Interventionist encouraging focus on periods of higher adherence on charts</li> </ul>                                                                                                                              |

| Module                                                                                                                                                           | COM-B                                                                                         | Intervention functions                                | Behaviour Change Techniques                                                                                                                                                                                                                                                                                 | Mode of Delivery                                                                                                                                                                                                                                                                                                                                                                                                                                               |
|------------------------------------------------------------------------------------------------------------------------------------------------------------------|-----------------------------------------------------------------------------------------------|-------------------------------------------------------|-------------------------------------------------------------------------------------------------------------------------------------------------------------------------------------------------------------------------------------------------------------------------------------------------------------|----------------------------------------------------------------------------------------------------------------------------------------------------------------------------------------------------------------------------------------------------------------------------------------------------------------------------------------------------------------------------------------------------------------------------------------------------------------|
| <i>Tailored parts of the intervention (based on baseline COM beliefs and barriers questionnaire (COM-BMQ)<sup>1</sup> and consultation with interventionist)</i> |                                                                                               |                                                       |                                                                                                                                                                                                                                                                                                             |                                                                                                                                                                                                                                                                                                                                                                                                                                                                |
| <b>My treatment</b>                                                                                                                                              | Reflective<br>Motivation<br>Psychological capability                                          | Education<br>Persuasion<br>Modelling                  | <ul style="list-style-type: none"> <li>Information about health consequences</li> <li>Credible source</li> <li>Saliency of consequences</li> <li>Demonstration of the behaviour</li> <li>Vicarious consequences</li> <li>Self-talk</li> </ul>                                                               | <ul style="list-style-type: none"> <li>Q&amp;A linked to information within CFHealthHub (tailored by baseline beliefs and prescription data)</li> <li>Presentation through text, patient stories, 'talking heads' and animation</li> <li>Credible sources including clinicians, PWCF and interventionist</li> <li>Interventionist eliciting self-talk through focus on why motivation is not lower than rating given on pre-screening questionnaire</li> </ul> |
| <b>Confidence building</b>                                                                                                                                       | Reflective<br>Motivation                                                                      | Modelling<br>Persuasion                               | <ul style="list-style-type: none"> <li>Demonstration of behaviour</li> </ul>                                                                                                                                                                                                                                | <ul style="list-style-type: none"> <li>'Talking heads' videos of coping stories within CFHealthHub</li> </ul>                                                                                                                                                                                                                                                                                                                                                  |
| <b>Problem-solving (including skills training)</b>                                                                                                               | Physical capability<br>Psychological capability<br>Physical opportunity<br>Social opportunity | Training<br>Environmental restructuring<br>Enablement | <ul style="list-style-type: none"> <li>Instruction on how to perform the behaviour</li> <li>Demonstration of the behaviour</li> <li>Behavioural practice/rehearsal</li> <li>Problem solving</li> <li>Restructure the physical environment</li> <li>self-talk</li> <li>social support (practical)</li> </ul> | <ul style="list-style-type: none"> <li>Tailored problem solving guided by interventionist</li> <li>Solution bank within CFHealthHub.</li> <li>Construction of if-then coping plans</li> <li>Videos demonstrating correct use of nebulisers within CFHealthHub</li> </ul>                                                                                                                                                                                       |

1

Incorporating the Beliefs about Medicines Questionnaire (BMQ-specific nebuliser treatment) Horne, 2010

## 6.4.2 Intervention providers

Interventionists may already be working at, or be new to participating organisations or be the ACTiF interventionist employed to deliver the trial locally at the site. Externally appointed staff will be recruited through a formal job interview. Suitable individuals will include registered nurses or other member of the multidisciplinary team or a ; graduate in a suitable subject such as psychology or, other relevant profession who holds relevant skills / experience. Candidates for the post will ideally have a minimum of two years postgraduate experience which might include delivering a research project to time and target. They will be employed on the Project to work to NHS Agenda for Change Band 4 or above. They must have access to a car for work purposes e.g. participant home visits.

Interventionists will be supported in the delivery of the intervention by members of the Multidisciplinary team (MDT) at the site in which they are based. MDTs will receive training about the approach of the intervention, and the way in which they can support its delivery (see page 28).

Training for interventionists in how to deliver the intervention according to the specifications of the behaviour change manual will be provided by Marlene Hutchings with oversight provided by Madelynne Arden and/or Judy Bradley. A comprehensive training manual and training programme will be developed to facilitate this. A certificate of competence will be provided prior to the interventionist being able to use CFHealthHub with participants.

An additional trained regional interventionist will offer support to trial sites. This on occasion will involve input to patients (face to face or telephone contact), and assisting with problem solving via liaising with the nebuliser company. They will be named on the local site delegation log.

## 6.4.3 Materials

The BCI contains two broad categories of components:

- i. CFHealthHub behaviour change modules including adherence feedback used by PWCF and health professionals
- ii. The behaviour change manual and toolkit used by the interventionist in interactions with PWCF in order to understand the specific barriers to adherence for that individual, and to tailor and personalise delivery of the behaviour change modules accordingly.

## 6.4.4 Procedures

The BCI will be delivered over a 4 to 6 month period through a combination of face-to-face sessions and contact via telephone with an interventionist, and through participant interaction with different modules of content available on CFHealthHub. The interventionist will discuss participant data with members of the MDT to ensure that care is informed by objective adherence data. If any concerns become apparent as the interventionists collect data and work with participants, these concerns will be passed onto the clinical team. The clinical team will

1  
2  
3 follow their standard procedures in relation to any concerns raised. The intervention content  
4 and delivery flow are outlined in Figure 5 and described below:

#### 5 6 *6.4.4.1 Consent Visit (all participants)*

7 At the consent visit participants will be given a chipped nebuliser (eTrack) and Qualcom hub  
8 or the participants will receive a visit from a clinical trainer who will convert the participant's  
9 I-neb to a Bi-neb by adding a Bluetooth chip and providing a Smartphone hub. The clinical  
10 trainer may set up the Bi-neb in the patient's home or at hospital either during the main  
11 consent visit or at a separate visit after consent has been obtained. Both the eTrack and Bi-neb  
12 will connect to CFHealthHub which will enable adherence data be collected. The  
13 interventionist will input the participant's prescription details into CFHealthHub. Together  
14 these will allow the system to generate adherence charts for that participant. At this visit  
15 participants will complete a range of baseline measures (see Table 3) including the COM  
16 beliefs and barriers questionnaire (COM-BMQ) which will be entered into CFHealthHub.  
17 The responses to this questionnaire will be used to populate the 'My toolkit' section of  
18 CFHealthHub with specific tailored elements from the 'My treatment' modules prior to the  
19 Initial Intervention Visit. The participant's pseudomonas status will be clarified at baseline  
20 and confirmed by the PI with the opportunity to compare the participant's prescription with  
21 the pseudomonas status.  
22  
23  
24

#### 25 *6.4.4.2 Initial Intervention Visit (intervention arm only)*

26 Participants will be introduced to CFHealthHub. They will be asked to complete an online  
27 consent form on behalf of their NHS trust in which they will specify what additional data they  
28 would be willing for CFHealthHub to record and display (e.g. name, and uploaded  
29 photographs) and what functional options they would like access to (e.g. push notifications).  
30 Permissions may be changed at any time. The participant will have the option to upload their  
31 own "patient story" into CFHealthHub after completion of the online consent form.  
32 The interventionist will discuss their motivation to adhere to their nebuliser treatment, will  
33 address beliefs associated with poor adherence and will refer back to answers on the COM-  
34 BMQ to elicit the participants beliefs associated with adherence. Participants will be shown  
35 'My toolkit' which will have been prepopulated with tailored motivational content (see  
36 consent visit).  
37  
38  
39

40 The interventionist and participant will look at and discuss the adherence charts on  
41 CFHealthHub with a focus on period of higher adherence. The interventionist will note any  
42 barriers raised by participants during this discussion.

43 The interventionist will support the participant to identify where and when additional  
44 nebuliser treatments could be fitted into their schedule and support them to make an action  
45 plan using the online tool available on CFHealthHub. This action plan will be saved to the  
46 'My toolkit' zone. The interventionist will then agree a % adherence goal for the next four to  
47 six weeks based on the number of additional treatments that have been planned. This will be  
48 recorded on CFHealthHub and will be represented by a target line on the adherence charts.

49 If motivation is so low that participants are reluctant to set an action plan/goal then the  
50 interventionist will spend further time discussing motivation and will skip to confidence  
51 building (see below).  
52  
53  
54

55 The interventionist will encourage participants to focus on likely problems or issues that  
56 might disrupt the achievement of the adherence goal and will use the Problem-solving module  
57 on CFHealthHub to address each of these anticipated problems. The Problem-solving module  
58 includes solutions based on educational content, practical support (e.g. model letters to  
59  
60

employers) and interactive tools. Relevant solutions will be saved to the 'My Toolkit' zone of CFHealthHub.

The interventionist will discuss the participant's confidence to meet their goal and will identify 2-3 'talking heads' videos showing other people with CF addressing and overcoming similar barriers to nebuliser adherence.

The visit will conclude with a review of the goal and the tailored and personalised contents saved to the 'My toolkit' zone of CFHealthHub. The interventionist will encourage a learning mindset, emphasising that even if adherence doesn't increase starting to think about adherence will produce learning that will make subsequent attempts to change easier.

#### 6.4.4.3 Participant Independent access to CFHealthHub (intervention arm)

Participants will have independent access to CFHealthHub at all times following the Baseline visit. They can, at any time, access their adherence charts, 'My toolkit' contents, and can browse the other areas of content as they wish. Frequency of access to each area of CFHealthHub will be monitored and recorded.

Adherence charts will provide colour -coded feedback about participant achievement towards their adherence goal so that they are provided with immediate, easy to recognise information about their achievements. Subject to consent, participants will be sent encouraging messages via push notifications, or alternatively when they access CFHealthHub, to match the progress made e.g. congratulations on achieving their goal, congratulations on having made progress towards their goal, encouragement to remember their action plan.

#### 6.4.4.4 Review visit (Visit 3 - intervention arm)

At the review visit, the interventionist and participant will look at and discuss the adherence charts on CFHealthHub and goal achievement with a focus on progress made and periods of higher adherence.

If the adherence goal was met then the participant will be encouraged to set a new higher adherence goal or to a goal to maintain their current level of adherence which will be recorded on CFHealthHub. Following this the participant and interventionist will review the contents of 'My toolkit' and revise action plans, problems/solutions as required. If issues of motivation are still a concern the interventionist may recommend additional/alternate elements of content from 'My treatment' or 'Talking heads' to go into 'My toolkit'.

If the adherence goal was not met then the interventionist and participants will discuss the barriers to goal achievement (motivation, capability, opportunity). The interventionist will address beliefs associated with poor adherence and will add/revise the elements of content from 'My treatment' or 'Confidence building' to go into 'My toolkit'.

If no goal was previously set then the interventionist will review motivation and confidence and then will consider if the participant is ready to action plan and set a goal. If not they will spend more time reviewing motivation and confidence.

The participant will be encouraged to set a realistic % adherence goal for the next four to six weeks and this will be recorded on CFHealthHub. The interventionist will support the participant to revise their action plan as needed and save this to the 'My toolkit' zone. Based on the earlier discussion about the barriers that prevented goal achievement the Problem-solving module on CFHealthHub will be used to address each of the problems encountered, and any that are anticipated. Relevant solutions will be saved to the 'My Toolkit' zone of CFHealthHub.

The visit will conclude with a review of the goal and the tailored and personalised contents saved to the 'My toolkit' zone of CFHealthHub. The interventionist will re-emphasise a

1  
2  
3 learning mindset, emphasising that the participant cannot fail, but can learn from the process  
4 so that they can work together on the adherence challenge.  
5

6  
7 Participating centres will provide participants with contact details, typically telephone  
8 numbers, but other methods may be volunteered by centres. Contact details will be provided  
9 so that participants can contact the centre if they have queries or problems regarding  
10 CFHealthHub between visits. The interventionist will be able to feedback any information  
11 from the intervention delivery **after** the baseline intervention visit to members of the wider  
12 CF team. This may include adherence data from sessions with the participant's clinician and  
13 MDT particularly if the participant raises any concerns or issues e.g. side effects of a drug to  
14 allow their usual clinician to discuss this with them at their next clinic visit.  
15

#### 16 *6.4.4.5 Subsequent Review (intervention arm)*

17 Following these two sessions the amount of interaction which each PWCF has with the  
18 interventionist will be tailored to their needs and requirements although it is anticipated that  
19 these will normally marry with routine clinic visits: They may have additional face-to-face  
20 sessions or contact via telephone or e-mail. No more than one monthly face-to-face session  
21 will be conducted because of the research protocol; if the participant requests additional  
22 support, the centre may accommodate this at their discretion. Review meetings will take 30  
23 minutes and be conducted over the 5month (+/- 1 month) of the follow-up period. The  
24 structure of review sessions will follow the same pattern as for 6.4.4.4.  
25  
26  
27  
28  
29  
30

#### 31 *6.4.4.6 Final research visit (5 months +/- 1 month from consent)*

32  
33 All participants will complete a final research visit 4-6 months from the date of consent. At  
34 this visit the interventionist will collect the primary and secondary outcome data (see table 3)  
35 including demography data, health care resource use and the participant completed  
36 questionnaires. At this final research visit the interventionist will re-check that all adherence  
37 data has been transferred to CFHealthHub. The eTrack can store approximately 6 months of  
38 treatment data, ensuring all the data is transferred at this visit should help to prevent missing  
39 data.  
40  
41

42 Following the final 4-6 month post-consent research visit, we will continue to collect:  
43 adherence data from CFHealthHub; exacerbations; FEV1 and ask participants the subjective  
44 adherence question until, 30th April 2017. At this point the study closes and the involvement  
45 of all participants ceases. After the trial ends (30/4/17), the aspiration is to allow participants  
46 in the control to have access to the intervention for which negotiations are ongoing. Currently  
47 funding is in place for the trial interventionists at study sites to deliver the intervention only  
48 over a 12-month period i.e. up to 30/4/17. It is anticipated that CFHealthHub used outside the  
49 trial would be delivered within the existing resources of the MDT so using CFHealthHub  
50 outside the trial should not need the trust to employ any additional staff members. As this is a  
51 pilot feasibility study where we are testing the intervention in participants, there is an  
52 expectation that further iteration of CFHealthHub may occur.  
53  
54  
55  
56  
57  
58  
59  
60

Figure 5. Behaviour change intervention flow chart

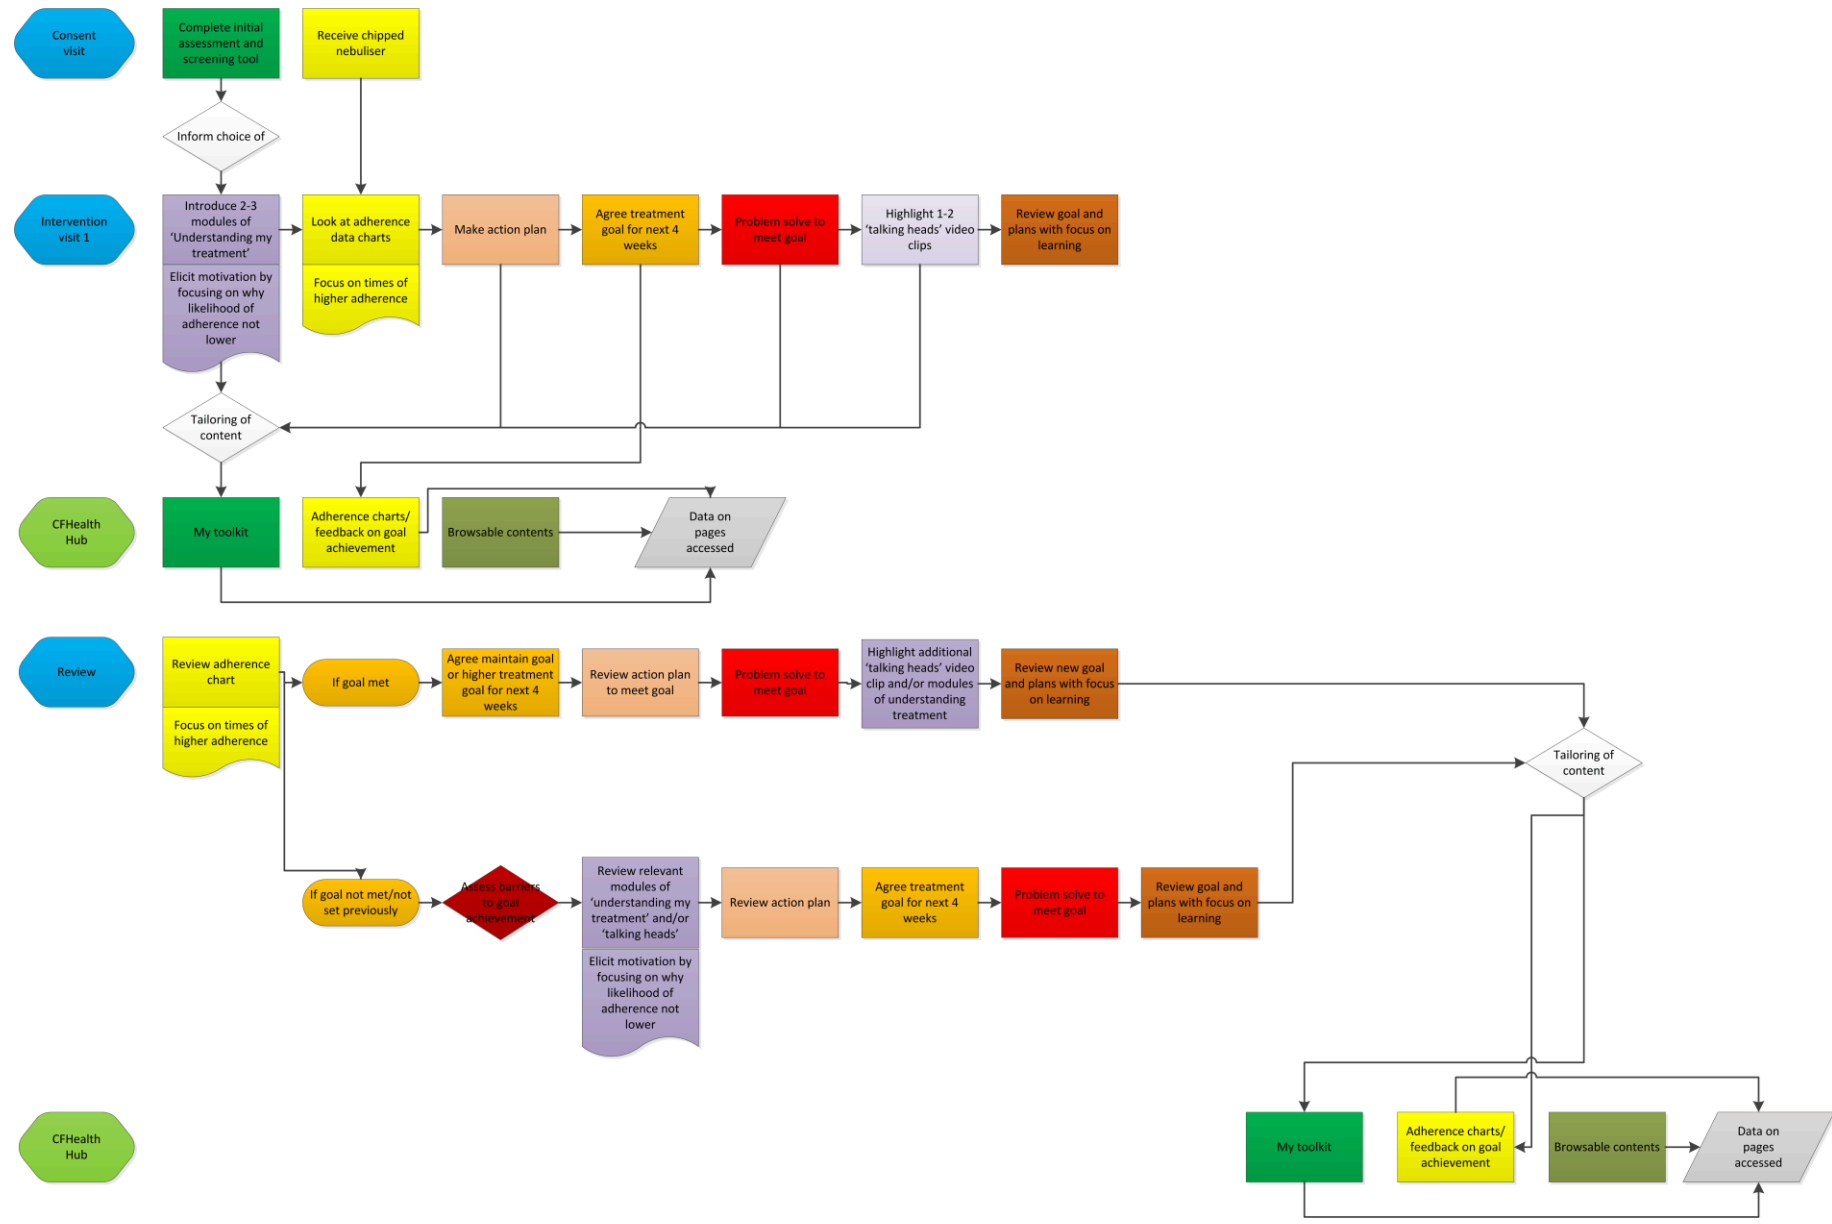

## 6.5 Usual care

Patients in both arms will receive usual care. Usual care is heterogeneous within and between centres, based on the needs of patients and the skills and interests of CF Unit staff. To better understand the configuration of usual care at participating centres a survey tool will be administered by the CTRU to the lead clinician at the centre. This will identify the spectrum of clinical and behaviour change interventions that are in use in the management and self-management of CF.

A minor component of the intervention is to train all members of the MDT in awareness of patient activation so that they are open to addressing issues raised for PWCF in the intervention arm. In addition, a staff member in the MDT will help to deliver the intervention. There is the possibility that the awareness of patient activation will have some effect on PWCF in both the intervention and control arms, and of leakage of the learning from the behaviour change component of the intervention to controls. We will investigate this possibility during the process evaluation.

Members of the MDT at each centre will receive one half-day, on-site, face-to-face training about the importance of objective nebuliser adherence data in the management of CF, and awareness of the importance of building patients' knowledge, skills and confidence to enable them to self-manage their treatment. This will include training in the interpretation of graphs and charts of objective adherence data produced by CFHealthHub, and the rationale for reducing target adherence in poor adherers in order to increase confidence. This will be delivered by designated members of the ACtiF research team.

Participants in the control arm will use a microchipped nebulizer but will not be able to access adherence data or other content and tools through CFHealthHub, neither will they receive the structured CFHealthHub intervention as described in the intervention manual. Control arm participants using Bi-neb nebulizers might have access to their data as part of routine care but this will not be in the user friendly format provided by the intervention.

One function of the qualitative research interviews with staff and control participants (see Section 8 below) is to understand the extent to which the patient activation awareness training has affected staff behaviour and whether control arm participants have received some aspects of the behaviour change intervention.

## 6.6 Criteria for discontinuing or modifying allocated interventions

There are no criteria for discontinuing treatment. Participants will be made aware that their participation is voluntary and they may discontinue study interventions, should they wish, at any time.

If a participant wishes to withdraw from treatment they will be able to speak to a member of the site study team i.e. ACtiF interventionist. This will be documented on a participant withdrawal form, within the Case Report Form. Any data already collected during the course of the trial up to the point of withdrawal will be used in the final analysis. We will ask the participants for their permission to continue to collect the primary outcome data i.e. CF exacerbations. The participant or clinician can make the decision to discontinue the allocated study intervention for any reason.

Participants will have the following options if they wish to withdraw:

1. Withdraw from the intervention i.e. intervention delivery visits only but will remain in the study. Patients can continue to use CFHealthHub. All study data would continue to be collected at subsequent follow up time points as per protocol.
2. Withdrawal from the study. Unless the patient objects, any data collected up to this point would be retained and used in the study analysis. The local interventionist would ask the participant if they agree to the collection of primary outcome data as defined in the protocol and or adherence data If



1 they agree to collection of adherence data, CTRU and or interventionist will continue to follow up  
2 participants for adherence data.  
3

- 4
- 5 3. Withdrawal from the trial entirely. Unless the patient objects, any data collected up to this point  
6 would be retained and used in the study analysis. If the patient does not wish to be contacted with  
7 regard to primary outcome data or adherence data, no further contact with regard to the study will be  
8 made. If the participant does specifically request for all their data to be removed information  
9 regarding the participant will be retained at site, as part of the patient notes, along with their  
10 withdrawal form and request to delete the data.  
11

12

13 A participant would be classed as complete if they have continued in the study until the last protocol defined  
14 visit, however there may be missing visits and / or data.  
15

### 16

### 17 ***Loss to Follow-Up***

18 A participant would be classed as lost to follow up if the participant has 1) not completed the study or 2)  
19 been withdrawn despite attempts for further contact, as per protocol, having been made. Unless the  
20 participant withdraws from the study entirely we will continue to collect the primary outcome data when  
21 possible (i.e. from medical notes).  
22

23

24 This withdrawal section has been developed in accordance with the CTRU Participant Discontinuation and  
25 Withdrawal of Consent Standard Operating Procedure (SSU003).  
26

## 27

## 28

## 29 **6.7 Strategies to improve adherence to intervention protocols**

### 30

### 31 **6.7.1 For health professionals**

32 The intervention protocols will be described in detail in an intervention manual. Interventionists will be  
33 trained to deliver the intervention according to the manual protocols. Interventionist training (as a form of  
34 behaviour change) will focus on Capability, Opportunity and Motivation. It will utilise evidence about the  
35 importance and likely effectiveness of the intervention and will challenge common misconceptions about  
36 adherence. Skills training and an introduction to the tools available on CFHealthHub will increase staff  
37 capability, and we will work with clinics and clinicians to ensure that the practical requirements for  
38 intervention delivery are in place: space, time etc (opportunity).  
39

40 CFHealthHub will record interventionist access to the site. It will also automatize some of the tailoring of  
41 the intervention according to the COM-BMQ which will be completed online. The contents of 'My Toolkit'  
42 will be recorded for each participant so that we will have records of what content they have been  
43 recommended. Interventionists will also be required to complete session records each time that they deliver  
44 the intervention to record the decisions made and the reasons for these,  
45  
46

### 47

### 48

### 49 **6.7.2 For patients**

50 Where participants provide consent we will send optional push notifications to encourage engagement with  
51 CFHealthHub. For example, we will send congratulatory messages when adherence improves, encouraging  
52 messages to remind participants to engage with the content. Face-to-face visits will, where possible be  
53 arranged to coincide with clinic visits as per usual care, therefore minimising the additional burden on  
54 participants.  
55

## 56

## 57

## 58 **6.8 Relevant permitted / prohibited concomitant care**

59 No concomitant care will be denied based on the research protocol.  
60

## 7. Outcomes

### 7.1 Feasibility outcomes ('stop-go' or 'success' criteria for RCT)

In line with proposed CONSORT extension for pilot studies [37], in this section, we state the criteria for success of the external pilot trial. The criteria are based on the primary feasibility objectives, which provide the basis for interpreting the results of the external pilot and for determining the feasibility of proceeding to the full-scale study scheduled for months 31 to 60 of the project. Depending on the funder's perspectives, the outcome of the external pilot might be:

- (i) "Stop - main study not feasible";
- (ii) "Continue, but modify protocol - feasible with modifications";
- (iii) "Continue without modifications, but monitor closely - feasible with close monitoring"; or,
- (iv) "Continue without modifications - feasible as is." [37]

We anticipate that modifications to the research protocol will be necessary as the feasibility study progresses. Some of the qualitative research will be undertaken early in the pilot trial and lessons learned about the trial procedures will be identified and acted on during the pilot trial. There are three objective stop-go criteria:

#### **1. Feasibility of recruitment to RCT**

Defined as recruitment of no fewer than 48 participants randomised at two centres over four months, 75% of the rate required in the main trial;

#### **2. Feasibility of retaining participants in the RCT**

Defined as attrition from the research protocol of no more than 15% of randomised participants at 5 (+/-1) months.

If these are met the full trial will go ahead. If these are not met overall, but are met in the last half of the pilot trial after trial procedures have been improved based on lessons learned from the early stage of the pilot trial, then the full trial will go ahead.

### 7.2 Process data relating to the implementation of the trial

#### **1. Number and characteristics of eligible patients approached for the study**

Collected by centres in screening logs and transferred to Prospect database

#### **2. Reasons for refused consent**

Collected by centres in screening logs and transferred to Prospect database.

#### **3. Reach**

How many participants are consented into the study, sub-grouped by socio-economic status (from CF Registry), as a proportion of:

- Those approached, expressed quantitatively, based on 'pre-screening' logs completed by ACtiF interventionist;
- Those known to be eligible, expressed quantitatively based on CF Registry.

#### **4. Participant attrition rate**

Collected by centres in screening logs and transferred to Prospect database.

### 5. *Reasons for attrition*

Collected by centres in screening logs and transferred to Prospect database.

### 6. *Maintenance:*

The processes by which participants are kept involved in the collection of key secondary outcome data research data:

- The extent to which adherence data is successfully uploaded from the chipped nebulisers , described quantitatively using CFHealthHub (Intervention arm only).

### 7. *Number of missing values/incomplete cases*

Assessed by data management team, based on data in Prospect database.

### 8. *Participant,/interventionist and members of MDT views on research protocols*

Assessed through qualitative interviews and to include:

- Barriers to recruitment, problems encountered in reaching participants [38];
- Perceived problems with trial procedures such as recruitment, informed consent etc.
- Acceptability
- Perceived utility and burden of outcome assessments.

### 9. *A survey on the content of usual care at participating centres*

A CTRU staff member will complete this survey with the principal investigator, a senior medic or delegate working at the participating centre.

## 7.3 Process data relating to the implementation of the intervention

### 1. *Context*

Definitions of ‘context’ tend to cluster around setting, roles, interactions and relationships [39]. It is important that context is understood as diachronic and emergent rather than synchronic and static [40, 41]. Frameworks for process evaluation have defined ‘context’ as:

- “aspects of the larger social, political, and economic environment that may influence intervention implementation” [42];
- “factors external to the intervention which may influence its implementation, or whether its mechanisms of impact act as intended” [43].

The context, and its interaction with implementation, mechanisms of impact, outcomes, the description of the intervention and its causal assumptions [43] will be described using qualitative data from research interviews, field notes, study management logs, minutes and e-mails. The focus will be how the context of individual CF Units affects implementation of the intervention and its potential outcomes.

### 2. *Implementation*

Definitions of ‘implementation’ tend to cluster around the processes or stages of adoption, the methods, means or social organisation of bringing innovative practices into use [39]. One way of describing the process of getting research into practice is to use a process model [44]. To structure our narrative of how the complex intervention was implemented we will use a process model called the Quality of Implementation Framework [45].

### 3. *Recruitment:*

Based on e-mails and minutes we will describe in narrative terms, the procedures used to approach and attract to the project NHS Trusts and interventionists [42].

#### 4. *Training:*

The comprehensiveness of the training component of the intervention for the health professionals delivering the intervention will be assessed by a combination of audio recordings of consultations and by interview.

#### 5. *Fidelity*

“The extent to which the intervention was delivered as planned. It represents the quality and integrity of the intervention as conceived by the developers. Fidelity is a function of the intervention providers.”[42]

- Interaction with participant along lines recommended by manual, determined by audio recordings of consultations between the interventionist and PwCF in the intervention arm.
- Recommendation of appropriate CFHealthHub tasks by interventionist, determined by audio recordings and by data from CFHealthHub;

The fidelity assessment will be developed and based on a tool used by Borelli et al [46].

#### 6. *Use [38] / dose received [42] of intervention*

Use of CFHealthHub by participant, as proposed by interventionist, determined by data capture by CFHealthHub, including the online activities started and completed, minutes spent on recommended pages and which parts the participant has picked out and put in a “my favourites” page. The number of times, frequency over time and duration with which users log on to CFHealthHub, as well as the activities they perform while logged in, described quantitatively using data from CFHealthHub.

A record of the discussion between the interventionist and the MDT will be kept. This will include who was there, brief notes of what was discussed and any agreement of treatment goals made.

#### 7. *Acceptability*

The acceptability of the intervention to hospital staff and PWCF assessed through semi-structured interviews.

#### 8. *Perceived benefits and harms*

Assessed through semi-structured interviews with health professionals and PWCF.

#### 9. *Leakage of intervention to controls*

Assessed through audio recordings of consultations between the MDT, interventionist, and PwCF in the control arm, and semi-structured interviews with PwCF in the control arm.

### 7.4 Clinical outcomes and covariates

The time schedule of enrolment, interventions (including any run-ins and washouts), assessments, and visits for participants can be found in Table 3 and Table 4 below.

#### 7.4.1 Primary clinical outcome

The primary clinical outcome is the number of pulmonary exacerbations in 5 (+/-1) month post-baseline follow-up period, defined according to the Fuchs criteria [47]. An exacerbation of respiratory symptoms will be said to have occurred when a patient was treated with parenteral antibiotics for **any one of the following 12 signs or symptoms** [48]:

1. change in sputum;
2. new or increased hemoptysis;
3. increased cough;
4. increased dyspnea;
5. malaise, fatigue, or lethargy;

- 1 6. temperature above 38 °C;
- 2 7. anorexia or weight loss;
- 3 8. sinus pain or tenderness;
- 4 9. change in sinus discharge.
- 5 10. change in physical examination of the chest, derived from notes by site staff.
- 6 11. decrease in pulmonary function by 10 percent or more from a previously recorded value, derived
- 7 from notes by site staff; or,
- 8 12. radiographic changes indicative of pulmonary infection, derived from notes by site staff.
- 9
- 10
- 11

12 The trial interventionist or prescribing clinician/nurse will collect data on the “exacerbations” form at the  
13 point of a participant starting a course of IV antibiotics.

#### 16 7.4.2 Secondary clinical outcomes

- 17 1. **Body Mass Index (BMI).**
- 18
- 19
- 20 2. **Forced expiratory volume in 1 second (FEV<sub>1</sub>):** standardised spirometry as a measure of condition
- 21 severity [49].
- 22
- 23 3. **EuroQol EQ-5D-5L:** generic health status measure for health economic analysis [50].
- 24
- 25 4. **The Patient Activation Measure (PAM-13) (Health Style Assessment):** assessment of patient
- 26 knowledge, skill, and confidence for self-management [51]. \*PAM-13 was labelled as “Health Style
- 27 Assessment” following a request from the licence owners to ensure the purpose of the questionnaire
- 28 is clear for participants.
- 29
- 30 5. **Assessment of routine :** measure of life chaos [52].
- 31
- 32 6. **Self-Report Behavioural Automaticity Index (SRBAI):** automaticity-specific subscale of the Self
- 33 Report Habit index to capture habit-based behaviour patterns [53].
- 34
- 35 7. **Cystic Fibrosis Questionnaire-Revised (CFQ-R):** disease specific health-related quality of life
- 36 instrument [54].
- 37
- 38 8. **The Patient Health Questionnaire depression scale (PHQ-8):** severity measure for depressive
- 39 disorders [55].
- 40 9. **MAD (Medication Adherence Data-3 items) :** medication adherence measure
- 41
- 42 10. **The General Anxiety Disorder 7-item anxiety scale (GAD-7):** severity measure for anxiety [56].
- 43
- 44 11. **The Capability Opportunity Motivation Behaviour Beliefs Questionnaire (COM-BMQ):** This
- 45 questionnaire incorporates:
- 46
- 47 a. **The Beliefs about Medicines Questionnaire - specific (Nebuliser adherence) (BMQ 21-**
- 48 **item):** a validated self-report tool[57], customised by the author to identify perceived
- 49 necessities and concerns for nebuliser treatment.
- 50
- 51 b. The following project-specific items: one additional belief item, one intention item, one
- 52 confidence item, and a list of barriers. These will serve as a tailoring tool for the intervention
- 53 and also as a secondary outcome measure.
- 54
- 55 12. **Subjective adherence single question:** self-report estimate of adherence as a percentage. Self-
- 56 reported problems: identification of capability and opportunity barriers to nebuliser adherence
- 57
- 58
- 59
- 60

- 1  
2  
3  
4  
5  
6  
7  
8  
9  
10  
11  
12  
13  
14  
15  
16  
17  
18  
19  
20  
21  
22
13. **Concomitant medications:** bespoke instrument, designed for this research project.
  14. **Resource use form:** interventionist collects data from a combination of hospital notes and the NHS patient electronic system to determine 1) inpatient IV days 2) Routine clinic visits 3) Unscheduled outpatient contacts 3) unscheduled inpatient stays.
  15. **Exploratory analysis of habit formation:** analyses with the objective nebuliser data will be performed to explore the process of habit formation with the delivery of the adherence intervention
  16. **Prescription:** a monthly prescription check to both check for data transfer to CFHealthHub and review for an indication that the prescription has changed or indication of microorganism e.g. pseudomonas (please see table 2 and 3 and refer to section 10.1.1).
  17. **Adherence to prescribed medication (see 7.4.3)**
  18. **Any treatment with IV antibiotics**

### 23 7.4.3 Adherence to prescribed medication

24  
25  
26 Adherence to prescribed medication will be defined in several ways including:

- 27  
28  
29  
30  
31  
32  
33
1. Unadjusted adherence
  2. Simple normative adherence (without numerator adjustment)
  3. Sophisticated normative adherence (without numerator adjustment)
  4. Simple normative adherence (with numerator adjustment)
  5. Sophisticated normative adherence (with numerator adjustment)

34  
35 Further detail about the outcomes will be reported in the trial statistical analysis plan.  
36  
37  
38  
39  
40  
41  
42  
43  
44  
45  
46  
47  
48  
49  
50  
51  
52  
53  
54  
55  
56  
57  
58  
59  
60

**Table 3. Individual-level data derived from PWCF and sites**

|                                                                                                                                                                                                                                                                                                                                                                                                               | Where?   | Completed by? | Consent visit | Baseline (intervention) visit | At clinic visits | Exacerbations episode | 5 months (+/- 1 month) from consent visit | Up to 30 <sup>th</sup> April 2017 |
|---------------------------------------------------------------------------------------------------------------------------------------------------------------------------------------------------------------------------------------------------------------------------------------------------------------------------------------------------------------------------------------------------------------|----------|---------------|---------------|-------------------------------|------------------|-----------------------|-------------------------------------------|-----------------------------------|
| <b>Enrolment</b>                                                                                                                                                                                                                                                                                                                                                                                              |          |               |               |                               |                  |                       |                                           |                                   |
| Pre-screening form (before 1 <sup>st</sup> visit)                                                                                                                                                                                                                                                                                                                                                             | Prospect | Site          | -             | -                             | -                | -                     | -                                         | -                                 |
| Confirmation of eligibility form                                                                                                                                                                                                                                                                                                                                                                              | Prospect | Site          | ●             | -                             | -                | -                     | -                                         | -                                 |
| Informed consent                                                                                                                                                                                                                                                                                                                                                                                              | Prospect | Site          | ●             | -                             | -                | -                     | -                                         | -                                 |
| Intravenous days in last registry year                                                                                                                                                                                                                                                                                                                                                                        | Prospect | Site          | ●             | -                             | -                | -                     | -                                         | -                                 |
| Pseudomonas status +                                                                                                                                                                                                                                                                                                                                                                                          | Prospect | Site          | ●             | -                             | -                | -                     | -                                         | -                                 |
| <b>Primary outcome</b>                                                                                                                                                                                                                                                                                                                                                                                        |          |               |               |                               |                  |                       |                                           |                                   |
| Exacerbations form including:<br>Parenteral antibiotics<br>Change in sputum*<br>New or increased hemoptysis*<br>Increased cough*<br>Increased dyspnea*<br>Malaise, fatigue, or lethargy*<br>Temperature above 38 °C*<br>Anorexia or weight loss*<br>Sinus pain or tenderness*<br>Change: sinus discharge*<br>Change: phys. exam. chest*<br>Decrease: pulmonary function *<br>Indicative radiographic changes* | Prospect | Site          | ●             | -                             | -                | ●                     | ●                                         | ●                                 |
| <b>Secondary outcomes</b>                                                                                                                                                                                                                                                                                                                                                                                     |          |               |               |                               |                  |                       |                                           |                                   |
| BMI (height and weight)                                                                                                                                                                                                                                                                                                                                                                                       | Prospect | Site          | ●             | -                             | -                | -                     | ●                                         | -                                 |
| FEV <sub>1</sub>                                                                                                                                                                                                                                                                                                                                                                                              | Prospect | Site          | ●             | -                             | ●                | -                     | ●                                         | ●                                 |
| EQ-5D-5L**                                                                                                                                                                                                                                                                                                                                                                                                    | Prospect | PWCF          | ●             | -                             | -                | ●                     | ●                                         | -                                 |
| PAM-13(Health Style Assessment)                                                                                                                                                                                                                                                                                                                                                                               | Prospect | PWCF          | ●             | -                             | -                | -                     | ●                                         | -                                 |
| Assessment of Routine                                                                                                                                                                                                                                                                                                                                                                                         | Prospect | PWCF          | ●             | -                             | -                | -                     | ●                                         | -                                 |
| SRBAI                                                                                                                                                                                                                                                                                                                                                                                                         | Prospect | PWCF          | ●             | -                             | -                | -                     | ●                                         | -                                 |
| CFQ-R                                                                                                                                                                                                                                                                                                                                                                                                         | Prospect | PWCF          | ●             | -                             | -                | -                     | ●                                         | -                                 |
| PHQ-8                                                                                                                                                                                                                                                                                                                                                                                                         | Prospect | PWCF          | ●             | -                             | -                | -                     | ●                                         | -                                 |
| GAD-7                                                                                                                                                                                                                                                                                                                                                                                                         | Prospect | PWCF          | ●             | -                             | -                | -                     | ●                                         | -                                 |
| MAD-3 (Medication Adherence Data-3 items)                                                                                                                                                                                                                                                                                                                                                                     | Prospect | PWCF          | ●             | -                             | -                | -                     | ●                                         | -                                 |
| COM-BMQ                                                                                                                                                                                                                                                                                                                                                                                                       | Prospect | PWCF          | ●             | -                             | -                | -                     | ●                                         | -                                 |
| Objective adherence                                                                                                                                                                                                                                                                                                                                                                                           | CFHH     | CFHH          | ●             | -                             | ●                | -                     | ●                                         | -                                 |
| Subjective adherence single question                                                                                                                                                                                                                                                                                                                                                                          | Prospect | PWCF          | ●             | -                             | ●                | -                     | ●                                         | ●                                 |
| Concomitant medications                                                                                                                                                                                                                                                                                                                                                                                       | Prospect | Site          | ●             | -                             | -                | -                     | ●                                         | -                                 |
| Other SAEs                                                                                                                                                                                                                                                                                                                                                                                                    | Prospect | Site          | -             | -                             | ●                | -                     | ●                                         | -                                 |
| Resource use                                                                                                                                                                                                                                                                                                                                                                                                  | Prospect | Site          | -             | -                             | -                | -                     | ●                                         | -                                 |

+ Pseudomonas (or other microorganism) status will be checked together with the monthly prescription

\* Only required where PWCF indicates they have received parenteral antibiotics

\*\* EQ5D-5L collected at the start and end of every exacerbation episode

**Table 4. CFHealthHub data (research arm only)**

|                                                                                                 | Completed by?          | Baseline (intervention) visit | At intervention visit s with interventionist | Between sessions | At clinic visits | 5 months (+/- 1 month) from consent visit | Up till 30th April 2017 |
|-------------------------------------------------------------------------------------------------|------------------------|-------------------------------|----------------------------------------------|------------------|------------------|-------------------------------------------|-------------------------|
| <b>Clinician metrics</b>                                                                        |                        |                               |                                              |                  |                  |                                           |                         |
| Adherence data*                                                                                 | PWCF                   | ●                             | ●                                            | ●                | ●                | ●                                         | ●                       |
| Recommendation of modules by interventionist                                                    | Interventionist        | ●                             | ●                                            | -                | ●                | -                                         | X                       |
| Feed back to participant their adherence data screens (data click)                              | Interventionist        | ●                             | ●                                            | -                | ●                | -                                         | X                       |
| Check prescription with participant                                                             | Interventionist        | ●                             | ●                                            | -                | ●                | -                                         | X                       |
| Order of clicks                                                                                 | CFHH                   | ●                             | ●                                            | -                | ●                | -                                         | X                       |
| Interventionist responds to patient changing prescription                                       | Interventionist        | -                             | ●                                            | ●                | ●                | ●                                         | X                       |
| Monthly check on prescription +                                                                 | Interventionist / CTRU | ●                             | ●                                            | ●                | ●                | ●                                         | X                       |
| Time in and out preparation                                                                     | Interventionist /CFHH  | ●                             | ●                                            | -                | -                | ●                                         | X                       |
| Time in and out with patient                                                                    | Interventionist /CFHH  | ●                             | ●                                            | -                | -                | ●                                         | X                       |
| Time in and out review                                                                          | Interventionist /CFHH  | ●                             | ●                                            | -                | -                | ●                                         | X                       |
| <b>Patient metrics</b>                                                                          |                        |                               |                                              |                  |                  |                                           |                         |
| Adherence (number of nebulized doses taken per day.) <sup>1</sup>                               | PWCF                   | ●                             | ●                                            | ●                | ●                | ●                                         | X                       |
| Duration of inhalation                                                                          | Nebuliser              | ●                             | ●                                            | -                | -                | -                                         | X                       |
| Accessing CFHealthHub – look at adherence data                                                  | PWCF                   | ●                             | ●                                            | -                | -                | -                                         | X                       |
| Accessing CFHealthHub – look at ‘My Toolkit’                                                    | PWCF                   | ●                             | ●                                            | -                | -                | -                                         | X                       |
| Accessing CFHealthHub problem solving / education / talking heads pages outside of ‘My Toolkit’ | PWCF                   | ●                             | ●                                            | -                | -                | -                                         | X                       |
| Accessing CF HealthHub – first to last click in a session                                       | PWCF                   | ●                             | ●                                            | -                | -                | -                                         | X                       |

\*Adherence data collected for both research and control arms

+ Monthly prescription checked by CTRU centrally to alert local interventionists to any potential changes in control arm and potentially also intervention arm

X data continued to be collected in CFHealthHub and interventionist responds for those participants who have “opted in” to receive intervention till 30/4/17

<sup>1</sup>To be broken down in statistical analysis plan.



**Figure 6. Participant timeline for the external pilot RCT**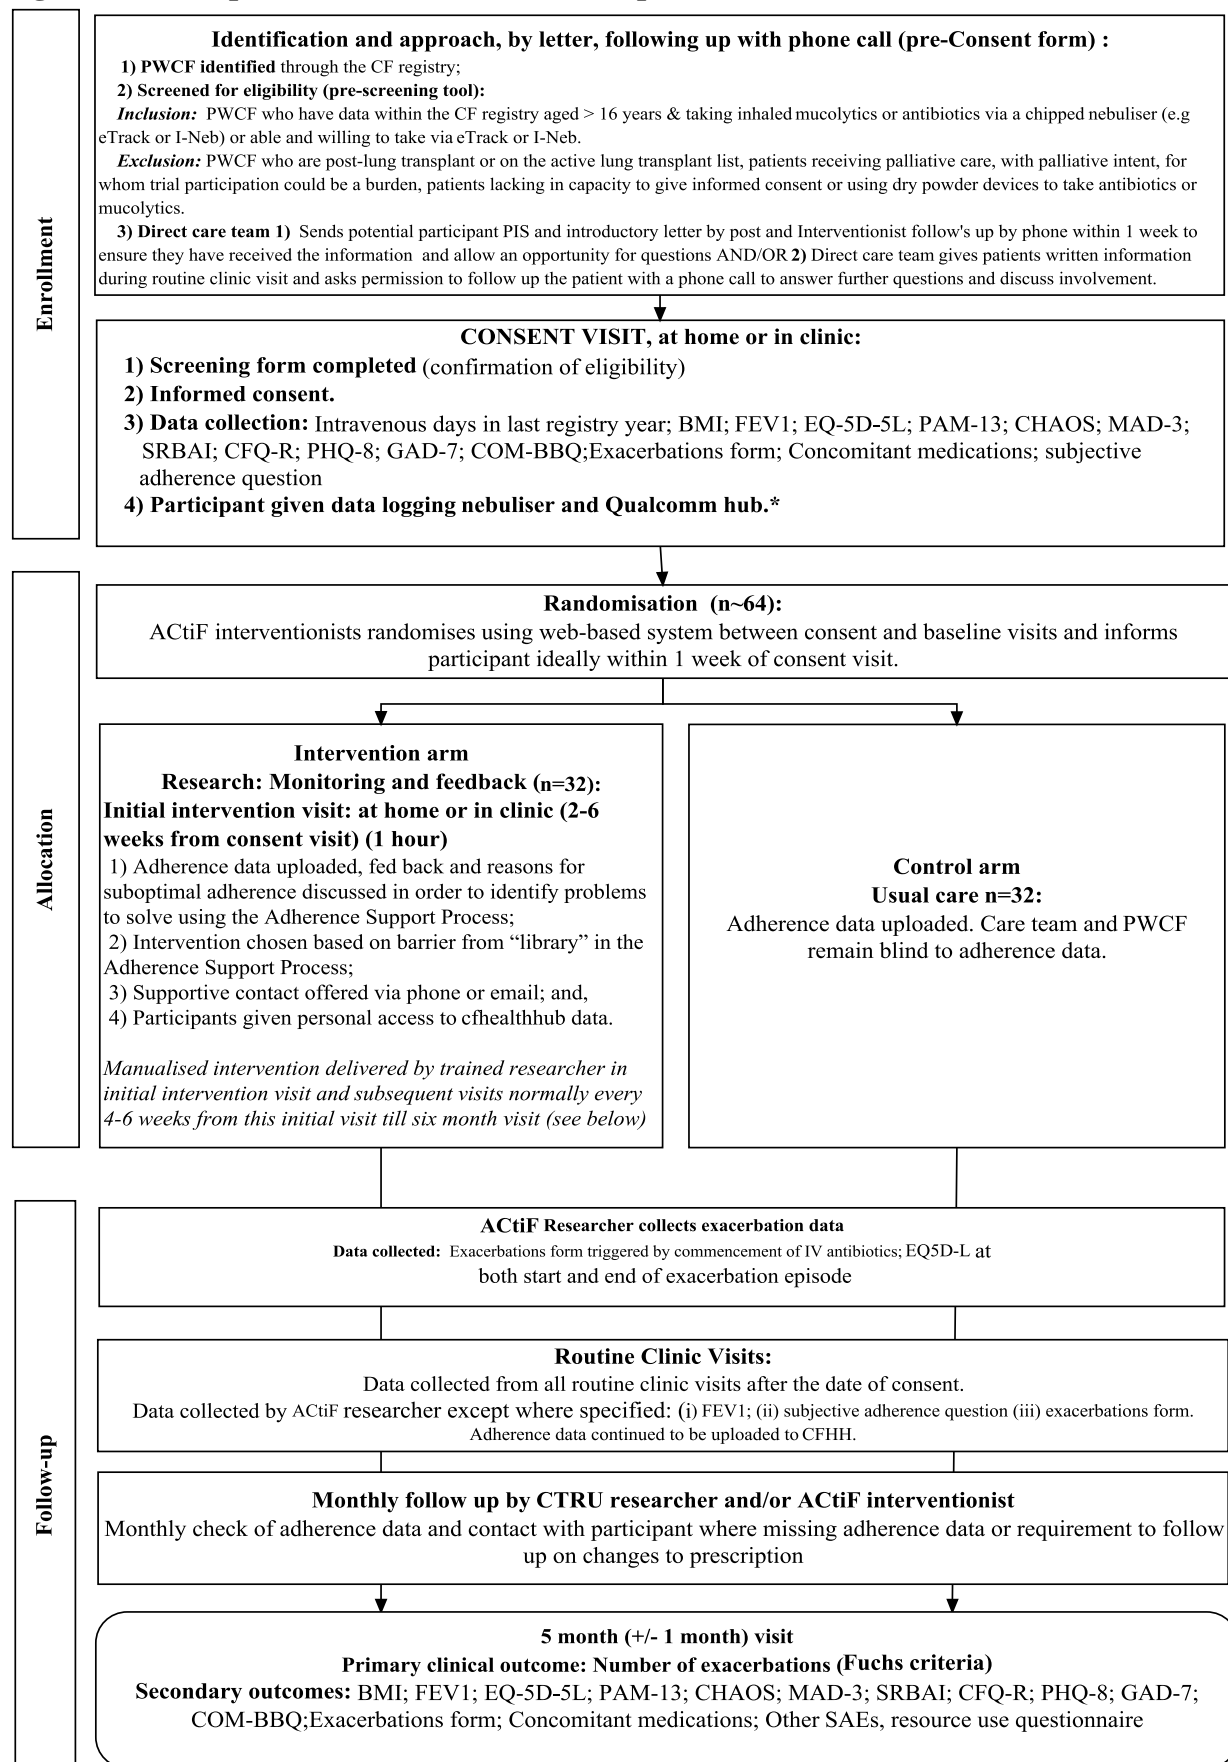

\*When I-nebs are converted to Bi-nebs a representative from the company (Philips) will do this between the consent visit and first intervention visit.

1 The study recognises that flexibility in accommodating participant schedules may cause time windows to  
2 change but this will allow us to adapt the intervention for the main RCT.  
3

## 4 **8. Sampling**

### 5 **8.1 Quantitative components**

#### 6 **8.1.1 Sites**

7 Two large specialist CF centres have been screened for their ability to recruit participants based on the  
8 number of participants they have on their CF registry and their motivation to participate in the pilot trial.  
9

#### 10 **8.1.2 Sample size**

11 The sample size for a feasibility study should be adequate to estimate the uncertain critical parameters  
12 (standard deviations for continuous outcomes; consent rates, event rates, attrition rates for binary outcomes)  
13 needed to inform the design of the full RCT with sufficient precision [37, 58–60]. For the main RCT, the  
14 target sample size is 688 participants (344 per arm). We are proposing that 15 CF units recruit on average 46  
15 patients in six months, a recruitment rate of approximately eight patients per centre per month.  
16

17 To assess whether this recruitment rate is feasible the external pilot RCT will open in two CF units for 12  
18 months, with four months recruitment, one months ‘run-in’ period (the period between the consent and  
19 baseline visit), and 5 (+/-1) months follow up. To match the proposed recruitment rate of the main RCT, the  
20 target sample over the four months for which the pilot RCT is open, will be 32 per centre (64 in total from  
21 the two pilot centres). We propose to recruit to time, that is for a fixed period of four months rather than to a  
22 fixed sample size. We would want to see a minimum of 75% of the recruitment target to be confident of the  
23 trial viability i.e. at least 48 patients in total consented and randomized in four months’ of recruitment from  
24 two centres.  
25

#### 26 **8.1.3 Approach, non-participation and recruitment**

27 **Approach:** Health professionals involved in approaching and screening PWCF and collecting data will be  
28 trained in the study protocol and procedures. Additionally those taking consent will have up-to-date training  
29 in Good Clinical Practice (GCP). All study personnel will be named on the study delegation log. Health  
30 professionals working with the CF team will identify a sample of PWCF registered at the centre via the CF  
31 registry database locally. All inclusion and exclusion criteria will be assessable via patient records and they  
32 will exclude any patients who do not fit the eligibility criteria.  
33

34 A member of the participant’s direct clinical team will send the potential participant a PIS and introductory  
35 letter by post or give the written information during a routine clinic visit. A sticker with a website address  
36 and Quick Response code will be placed in the envelope both of which will link to a video of the researcher  
37 explaining the study. If information is provided in a routine clinic visit, the clinical care team will seek  
38 permission for the ACTiF Interventionist to follow up with a phone call in order to answer any further  
39 questions and discuss involvement. Written informed consent may be conducted at this visit where the  
40 participant is happy to take part as this is a low risk trial.  
41

42 **Telephone call:** Up to a week after posting out the information, the ACTiF Interventionist will telephone the  
43 PWCF to discuss the study over the phone and answer any questions. If the potential participant is happy to  
44 take part, the ACTiF Interventionist will arrange an appointment to gather written informed consent.  
45

46 **Non-participation:** Spontaneously offered reasons for non-participation in the trial will be recorded.  
47  
48  
49  
50  
51  
52  
53  
54  
55  
56  
57  
58  
59  
60

## 8.2 Qualitative components

*At each of the two pilot sites* we will undertake:

- Audio-recordings of all 16 initial assessments for PWCF in the intervention arm and 10-12 consultations between the senior interventionist from the MDT (or other MDT member) and PWCF in the control arm. Numbers will depend on numbers of PWCF giving written consent for this.
- 10-12 semi-structured face-to-face (or telephone or skype) interviews with PWCF receiving the intervention and 10-12 semi-structured face-to-face interviews with PWCF in the control arm (total n~40-48 PWCF; n~40-48 interviews);
- two semi-structured face-to-face (or telephone or skype) interviews with each of the two interventionists in each centre (total n=4 interventionists; n=8 interviews); and,
- two semi-structured (face to face, telephone or skype) interviews with two members of the MDT (total n=4 staff; n=8 interviews).

Written informed consent will be obtained from both the interventionist and the PWCF participating in the audio recording when they consent to be in the study. Separate consent will be sought from PWCF and interventionists or members of the wider CF team for semi-structured interviews.

## 9. Assignment of interventions

### 9.1 Sequence generation

Participants will be allocated in equal proportions to one of the two groups using a computer generated pseudo-random list, stratified by centre and the number of days participants have been on IV antibiotics in the previous 12 month period as collected at consent visit, with random permuted blocks of varying sizes. The two categories for stratification within the number of IV days will be (i) less than or equal to 14 days and (ii) greater than 14 days.

### 9.2 Allocation concealment

The allocation sequence will be hosted by the Sheffield CTRU in accordance with their standard operating procedures and will be held on a secure server. Access to the allocation sequence will be restricted to those with authorisation. The sequence will be concealed until recruitment, data collection, and analyses are complete.

### 9.3 Implementation

The allocation sequence will be created by a Sheffield CTRU statistician who is not otherwise associated with the trial. At the consent visit, a health professional who is named on the delegation log, will go over the patient information sheet again with the study candidate and answer any questions. If the PWCF is still willing to enter the trial, they obtain full written consent and complete the eligibility form. If the participant is eligible, then baseline assessments will be taken. The recruiting health professional will log into the remote, secure Internet-based randomisation system and enter basic demographic information, after which the allocation will be revealed.

### 9.4 Blinding

After revelation of the allocation, only the statisticians will be blinded to allocation as per CTRU SOPs (ST001 and ST005)

## 10. Data collection, management and analysis

### 10.1 Quantitative data

#### 10.1.1 Data collection methods

**Data handling and record keeping.** The Sheffield CTRU will oversee data collection, management and analysis and ensure the trial is undertaken according to Good Clinical Practice Guidelines and CTRU standard operating procedures. Data will be collected and retained in accordance with the Data Protection Act 1998. Patients will be reassured that all data which are collected during the course of the research will be kept strictly confidential.

The study team will train those collecting data in the study procedures before the trial begins. Data will either be collected directly from the participants, carers, interventionist, CFHealthHub or from source documents (e.g. patient notes) and input onto the CRF or Sheffield CTRU's electronic web-based data capture system (Prospect). The Data Monitoring and Management Plan for the study will provide further guidance on the types and levels of data and how these will be monitored and verified. Some essential documents may be posted to the central team to facilitate this e.g. participant consent forms in which case this will be detailed in the appropriate participant PIS and consent forms.

The CTRU will perform checks with the participant via monthly phone calls to ensure data is being captured and alert the local interventionist if there is an indication of a prescription change and a need to check pseudomonas (or other microorganism) status. This is required for the correct denominator to assess "normative adherence". Data will be extracted from the CF registry to understand exacerbations in the preceding 12 months since prior exacerbations can have a bearing on the optimum target regimen.

#### **Plans to promote participant retention and complete follow-up.**

Participant retention will be ensured by the following procedure:

1. At each point of contact, the interventionist will check with the participant that the Qualcomm hub or Smartphone hub is plugged in and turned on. A member of CTRU who is performing data and prescription checks may alert the interventionist. They will remind the participant of the proximity required for data transfer (10 metres)
2. In the event of no data being displayed in CFHealthHub for a period of at least a week (and the participant is not known to be on holiday) the interventionist will make contact with the participant (Email/Text/Telephone call) to check that the following
  - That the Qualcomm or Smartphone hub is plugged in
  - That the Qualcomm hub is working (showing solid green and yellow lights on the display)
  - That they have been within range of the Qualcomm hub sufficient to facilitate data transfer (10 metres)
  - That the Smartphone hub is switched on (showing the locked 'password' screen when any button is pressed)
  - That the Bi-neb and Smartphone hub have been kept in the same room, or at least have been in close proximity at some point during the day.

Any participants using the Bi-neb who are still experiencing issues after following the steps above, may receive a face to face or telephone support (at home or hospital) from the clinical trainer to resolve any outstanding issues.

#### **Troubleshooting:**

1 Data capture will be monitored both by interventionist at the site and centrally by the CTRU. In the event of  
2 data not being uploaded patients will be contacted to trouble shoot problems. Patients will be offered support  
3 to suit their circumstances including home visits (conducted by the members of the site research team) where  
4 necessary.  
5  
6  
7

### 8 **10.1.2 Data Management**

9 Anonymised trial data will be entered onto a validated database system designed to an agreed specification  
10 between the Chief Investigator and Sheffield CTRU. The research staff at sites (mainly the ACTiF  
11 interventionist) will be responsible for data entry locally. The Sheffield CTRU Trial Manager, research  
12 assistant and the Data Management Team will work with sites to ensure the quality of data provided. The  
13 study manager, research assistant, data manager, PI's, any research nurses and site interventionist will have  
14 access to the anonymised data on the database through the use of usernames and encrypted passwords. The  
15 system has a full electronic audit trail and will be regularly backed up. The secure data management system  
16 will incorporate quality control procedures to validate the study data. Error reports will be generated where  
17 data clarification is needed. Output for analysis will be generated in a format and at intervals to be agreed  
18 between Sheffield CTRU and the Chief Investigator.  
19  
20  
21

22 Trial documents will be retained in a secure location during and after the trial has finished. The study will  
23 use the CTRU's in-house data management system (Prospect) for the capture and storage of participant data.  
24 Prospect stores all data in a PostgreSQL database on virtual servers hosted by Corporate Information and  
25 Computing Services (CiCS) at the University of Sheffield. Prospect uses industry standard techniques to  
26 provide security, including password authentication and encryption using SSL/TLS. Access to Prospect is  
27 controlled by usernames and encrypted passwords, and a comprehensive privilege management feature can  
28 be used to ensure that users have access to only the minimum amount of data required to complete their  
29 tasks. This can be used to restrict access to personal identifiable data.  
30  
31  
32

33 Participants who give consent to the qualitative part of this study will also give consent to their name and  
34 address to be given to the University of Sheffield qualitative research staff in order to be contactable.  
35

### 36 **10.1.3 Data quality assurance**

37 Prospect provides a full electronic audit trail, as well as validation and verification features which will be  
38 used to monitor study data quality, in line with CTRU SOPs and the Data Management Plan (DMP). Error  
39 reports will be generated where data clarification is required. Rates of missing data and data points which are  
40 out of the expected or allowed range will be presented to the team at monthly management group meetings.  
41  
42  
43  
44  
45  
46  
47  
48  
49  
50  
51  
52  
53  
54  
55  
56  
57  
58  
59  
60

## 10.2 Qualitative data

### 10.2.1 Audio recordings of consultations

All initial assessments will be audio recorded with permission (n=16 in each site). Findings from early assessments will be fed back to the interventionist so that changes can be made to the intervention delivery before subsequent assessments. Consultations between the senior interventionist and PWCF in the control arm will be audio recorded with permission (n=10-12 in each site). Encrypted digital recorders will be used and recordings sent securely to the research team for analysis.

### 10.2.2 Semi-structured interviews: participants

In each site we will interview 3-4 PWCF receiving the intervention who are recruited at the beginning of the pilot. We will interview them around one month into the intervention to seek views of the most intensive part of the intervention. This will identify any problems early and be fed back to the intervention development team, staff delivering the intervention, and trial staff. We will interview 5-6 PWCF around four to six months into the intervention. These PWCF will have experienced more independent use of the CFHealthHub and we can explore how to keep PWCF engaged with the intervention in the longer term. We will interview 2-3 PWCF who drop out of the intervention to explore why this occurred. We will interview 10-12 PWCF in the control arm around four to six months into the trial to explore whether they have experienced aspects of patient activation and leakage of the intervention.

### 10.2.3 Semi-structured interviews: professionals

The first interviews with the interventionist and senior interventionist in each site will take place after they have undertaken assessments with the first few PWCF to identify teething problems with the intervention or the trial and the comprehensiveness of the training sessions they received. The findings will be fed back to the team to consider whether changes are needed to the intervention or trial protocol. The second interviews will take place when the first few PWCF have completed the intervention to allow the interventionist to reflect back over the whole process. The interventionists may have different lengths of experience of working with CF, nebulisers or behaviour change and we will consider the influence of differences in backgrounds on their ability to implement the intervention.

We will also undertake interviews with two members of the MDT at each centre when the first few PWCF have received 2-3 months of the intervention and then again towards the end of the feasibility study when all PWCF have been recruited and received around 3 months of the intervention.

### 10.2.4 Undertaking the interviews

For the interviews we have developed topic guides based on our research questions and these are attached to the application. Topic guides develop throughout any qualitative interview study and our topic guides may change as the study progresses. We will audio record all interviews after receiving written permission to do so. We will use an encrypted digital recorder. Reflexive notes will be made during and after the interviews. We expect

1  
2  
3 interviews to last around one hour. We do not expect data saturation in pilot studies; the aim  
4 is to identify any learning that can be addressed in preparation for the full trial.  
5  
6

## 7 8 **11. Data analysis**

### 9 10 **11.1 Quantitative analysis**

11 The analysis will be performed after data lock by a CTRU statistician under the supervision  
12 of the senior study statistician. As the trial is a pragmatic parallel group RCT data will be  
13 reported and presented according to the CONSORT 2010 statement [61] with reference to  
14 proposed extension for pilot / feasibility studies [37]. As a pilot/feasibility study the main  
15 analysis will be mainly descriptive and focus on confidence interval estimation and not  
16 formal hypothesis testing [58]. We will report rates of consent, recruitment and follow-up  
17 by centre and by randomized group.  
18  
19

20  
21 Clinical outcome measures will be summarised overall and by randomized group. Baseline  
22 demographic (age, gender), physical measurements (e.g. weight, height, BMI), and patient  
23 reported outcome measures (EQ-5D, PAM-13, Assessment of Routine, MAD-3, SRBAI,  
24 CFQ-R, GAD-7, COM-BMQ, PHQ-8), and clinical measurements (e.g. FEV1, IV days in  
25 last registry year ) will be described and summarised overall and for both treatment groups.  
26  
27

28 The primary outcome is the number of pulmonary exacerbations treated with IV antibiotics  
29 over the 6 month post-randomisation follow-up period. We will also include, as part of the  
30 feasibility analysis, estimation of the effect size for the 6-month pulmonary exacerbations  
31 outcome with 95% confidence interval estimates to check that the likely effect is within a  
32 clinically relevant range (as confirmation that it is worth progressing with the full trial). For  
33 this we will use a Poisson generalised linear model (GLM). Secondary continuous outcomes  
34 such as six-month post randomisation FEV1, BMI EQ-5D, PAM-13, Assessment of  
35 Routine, MAD-3, SRBAI, CFQ-R, GAD-7, COM-BMQ, PHQ-8) will be analysed with a  
36 multiple linear regression model with the baseline value of the outcome and randomised  
37 group as covariates. The treatment group coefficient and its associated 95% confidence  
38 interval will be reported from the various multiple linear regression models. The mean level  
39 of adherence (to prescribed medication) between the intervention and control groups over  
40 the 6 month post-randomisation follow-up period will also be reported and compared  
41 between the groups and a 95% confidence interval (CI) for the mean difference in this  
42 parameter between the randomised groups will also be calculated.  
43  
44  
45  
46

47 Further analyses with the objective nebuliser data will be performed to explore the process  
48 of habit formation with the delivery of the adherence intervention. The analyses will  
49 include:  
50

- 51 (a) generating objective habit scores by taking into account time of nebuliser use
- 52 (b) using statistical process control to identify when periods of stability is achieved
- 53 (c) other time-series methods, including cross-correlation between habit scores and  
54 adherence.  
55

56 Adverse events will be based on serious adverse events (SAE) case report forms. A serious  
57 adverse event is defined as any adverse event or adverse reaction that results in death, is life-  
58 threatening, requires hospitalisation or prolongation of existing hospitalisation, results in  
59 persistent or significant disability or incapacity, or is a congenital anomaly or birth defect.  
60

1  
2  
3 The following summaries will be presented as overall rates and stratified by AE  
4 classification:  
5

- 6 • the number and percentages of patients reported as having Serious Adverse Events  
7 (SAE) in each treatment arm; and,  
8
- 9 • the number and percentages recorded as having all forms of Adverse Events (AE) in  
10 each arm.  
11  
12

13 This information along with the acceptability of the study design and protocol to  
14 patients/GPs; the safety of the intervention; patient recruitment and attrition/retention rates  
15 will enable us to determine whether or not the definitive RCT is feasible within a  
16 satisfactory timescale and cost envelope using UK centres alone.  
17  
18  
19

## 20 **11.2 Qualitative analysis**

21 Transcripts will be coded using the latest version of NVivo (QSR International). The  
22 analysis will use the National Centre for Social Research 'Framework' approach [62]. AO'C  
23 and SD will undertake the following stages of the analysis of patient transcripts:  
24 familiarisation; identifying a thematic framework; indexing; charting; and, mapping and  
25 interpretation. The theoretical framework for understanding intervention adherence is the  
26 Necessities-Concerns framework [63] within the COM-B system [18]. This will be used  
27 within the thematic framework. We will use the process evaluation functions of context,  
28 mechanisms and implementation to frame the analysis [43]. Within mechanisms we will use  
29 the COM-B system as stated above and consider the use of the Theoretical Domains  
30 Framework [36]. We will compare and contrast findings from each site because the different  
31 backgrounds of the interventionists, and the different contexts in which care is provided in  
32 each CF unit, may affect implementation and acceptability of the intervention.  
33  
34  
35  
36  
37

### 38 **Figure 7. Assumptions of the MRC Guidance on Process Evaluation**

39  
40 [39, 64]  
41  
42  
43  
44  
45  
46  
47  
48  
49  
50  
51  
52  
53  
54  
55  
56  
57  
58  
59  
60



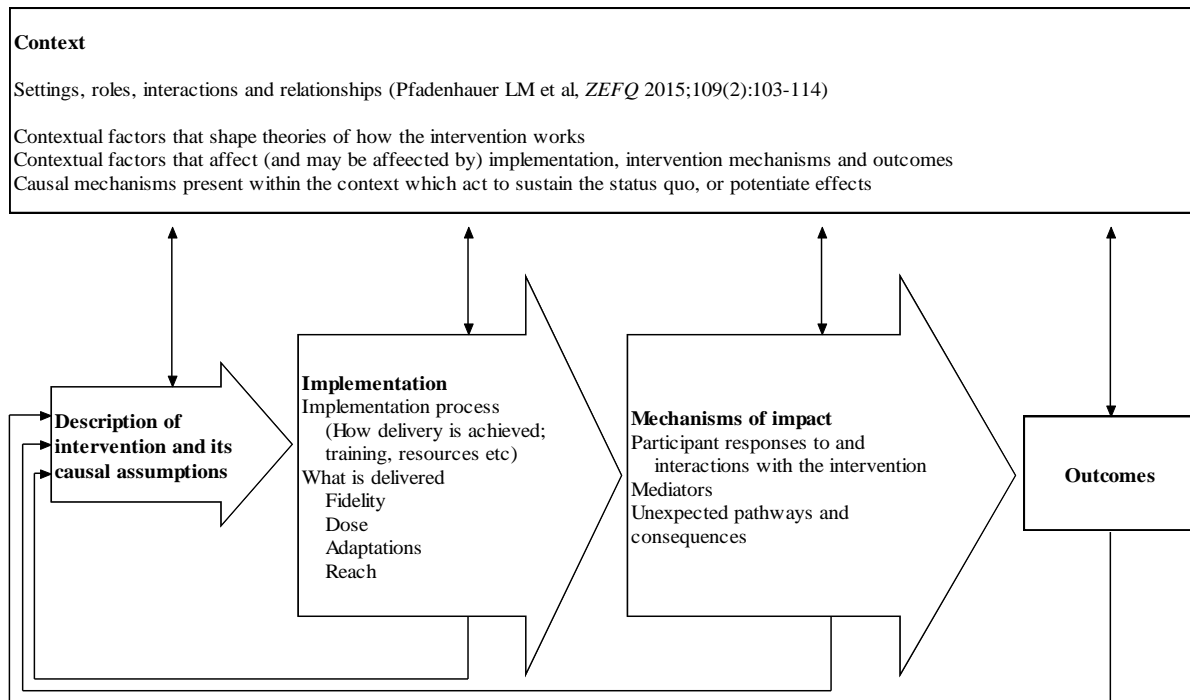

This qualitative research will:

- Inform the refinement of the intervention (e.g. CFHealthHub, training of interventionists, initial assessments, manualised instructions) and its implementation (e.g. introduction within a CF Unit) for use in the full trial.
- Inform refinement to trial procedures for the full trial.
- Inform the selection of the final secondary measures used in the full trial to ensure they address the perceived benefits of the intervention.
- Help to understand the extent of any leakage of the intervention to controls.

### 11.3 Combining data and findings from the different components

We will use Farmer's triangulation protocol to display the findings from each component of the study together and discuss as a team the extent to which findings converge, complement each other or contradict each other [65, 66]. For example, we will display all findings about recruitment together to consider the feasibility of recruitment for the full trial and the actions required to ensure feasibility. We will also display in a matrix the qualitative and quantitative data for individual PWCF who have received the intervention and been interviewed [66]. We will use this to consider the extent to which our secondary outcome measures identify issues raised by PWCF in the interviews.

## 12. Monitoring

### 12.1 Oversight

The CTRU SOP GOV003 Data Monitoring and Ethics Committee states "A DMEC does not need convening in studies that carry low risk to patients". This project involves

1  
2  
3 delivering a behaviour change intervention through the website CFHealthHub and would  
4 therefore be classified as low risk.  
5

6 The overall responsibility for the study will be with Sheffield Teaching Hospitals NHS  
7 Trust who will act as sponsors for the study. The local Principal Investigator (PI) will be  
8 responsible for the study at each participating site and it will be registered and approved  
9 with each local R&D department. The study will be conducted in accordance with the  
10 protocol, GCP and Sheffield CTRU Standard Operating Procedures. The two committees  
11 which will govern the conduct of the study are:  
12  
13

- 14 1. Programme Steering Committee (PSC)
  - 15 2. Project Management Group (PMG)
- 16  
17

18 The PSC will be responsible for the overall conduct of the trial and consists of an  
19 independent chair and four other independent members including a statistician and PPI  
20 representative. The committee will meet every 6 months to monitor the study.  
21  
22

23 The PMG will comprise of the trial manager and the core research team . The PMG will  
24 meet on a monthly basis to monitor the day-to-day running of the trial. The Trial Manager  
25 will be jointly supervised by the CI and the Assistant Director of CTRU via the form of  
26 regular meetings (face to face and telephone calls). The Trial Manager will be responsible  
27 for liaising with the whole project team. Trial monitoring procedures will be assessed  
28 based on the level of risk of the study. The Site Monitoring Plan will outline the types and  
29 frequency of site monitoring activities for the study and this will be agreed with the  
30 Sponsor prior to the start of the study.  
31  
32  
33

## 34 **12.2 Description of any interim analyses and stopping guidelines**

35 There are no planned interim analyses or stopping guidelines for this study.  
36  
37  
38

## 39 **12.3 Harms (safety assessments)**

### 40 **12.3.1 Serious Adverse Events**

41 Trial sites are to report Serious Adverse Events (SAEs) in conjunction with the CTRU  
42 standard operating procedure PM004 (Adverse events and serious adverse events). The  
43 definition of an SAE is as follows:  
44  
45

- 46 • results in death;
  - 47 • is life-threatening\* (subject at immediate risk of death);
  - 48 • requires in-patient hospitalisation or prolongation of existing hospitalisation;\*\*
  - 49 • results in persistent or significant disability or incapacity;
  - 50 • consists of a congenital anomaly or birth defect; or,
  - 51 • is another important medical event that may jeopardise the subject.\*\*\*
- 52  
53

54 \* 'life-threatening' refers to an event in which the patient was at risk of death at the time of  
55 the event; it does not refer to an event which hypothetically might have caused death if it  
56 were more severe.  
57

58 \*\*Hospitalisation is defined as an inpatient admission, regardless of length of stay, even if  
59 the hospitalisation is a precautionary measure for continued observation. Hospitalisations  
60

1  
2  
3 for a pre-existing condition, including elective procedures that have not worsened, do not  
4 constitute an SAE.

5 \*\*\*Other important medical events that may not result in death, be life-threatening, or  
6 require hospitalisation may be considered a serious adverse event/experience when, based  
7 upon appropriate medical judgment, they may jeopardise the subject and may require  
8 medical or surgical intervention to prevent one of the outcomes listed in this definition.  
9

10  
11 It is not anticipated that there will be many SAEs related to the behaviour change  
12 intervention. We will report any SAEs which are deemed related to the trial intervention  
13 and unexpected to the Sponsor within the specified timeframes below (12.3.4).  
14

### 15 16 17 **12.3.2 Adverse events we require reporting:**

18 We do require that sites report any new diagnosis of depression which requires treatment  
19 with medication or psychological therapy e.g. Cognitive Behavioural Therapy (CBT).  
20

### 21 22 23 **12.3.3 Expected SAEs and adverse events**

24 Certain adverse events are common to CF and associated medications. Expected SAEs  
25 must be reported in the annual safety report. Hospitalisation as a result of an exacerbation  
26 will be recorded in the study database and not be reported as an SAE.  
27

28 Expected AEs in relation to medications or common in patients with CF

- 29 1. Acute FEV1 drop >15% after 1<sup>st</sup> dose of medication
- 30 2. Increased productive cough
- 31 3. Nasal congestion or stuffy nose
- 32 4. Chest congestion
- 33 5. Wheezing
- 34 6. Chest pain or chest discomfort
- 35 7. Voice alteration/change
- 36 8. Dyspnea (breathlessness)
- 37 9. Haemoptysis (coughing blood)
- 38 10. Rhinitis
- 39 11.
- 40 12. Headache
- 41 13. Crackles in lung
- 42 14. Throat irritation/ sore throat
- 43 15. URTI
- 44 16. Sinusitis
- 45 17. Deafness
- 46
- 47 18. Indigestion / reflux
- 48 19. Tonsillitis
- 49 20. Joint pain
- 50 21. Decreased appetite
- 51 22. Fatigue
- 52 23. Headache
- 53
- 54
- 55
- 56
- 57
- 58
- 59
- 60

24. Distal intestinal obstructive syndrome
25. Fever
26. Otitis media or ear infection
27. Conjunctivitis
28. Pneumothorax
29. Decreased exercise tolerance
30. Pyrexia
31. Abdominal pain
32. Influenza
33. Pseudomonas infection
34. Vomiting
35. Diabetes
36. Pneumonia

### 12.3.4 Reporting

Adverse events and SAEs can be reported for participants at any stage of their trial participation. A member of the site study team (interventionist, clinician or other) will enquire about any adverse events at routine clinic appointments. These will be recorded on the adverse event section of the paper CRF and database. The event will be assessed by the local Principal Investigator and the form will be kept in the site file. Serious adverse events will be reported in the periodic safety reports to the research ethics committee and Trial Steering committee.

All adverse events (serious or other based on the definitions above) will be recorded on the case report form and details will be **entered on the study database within 1 week of completing the paper form**. Any SAEs which are deemed related to the trial intervention, the site will complete the paper CRF and **fax details this form to the CTRU within 24 hours of becoming aware of the event** in order for the CTRU to report this event to the Sponsor and the main REC within the required timeframes (15 days).

In participants using the Bi-Neb, any Adverse or SAEs relating to the use of Promixin via this device will be reported to the Patient Support team (PSP) at Phillips as per their standard practice.

### 12.4 Auditing

The sponsor will permit monitoring and audits by the relevant authorities, including the Research Ethics Committee. The investigator will also allow monitoring and audits by these bodies and the sponsor, and they will provide direct access to source data and documents.

### 12.5 Finance and indemnity

The trial has been financed by the NIHR and details have been drawn up in a separate agreement. This is an NHS sponsored study. If there is negligent harm during the clinical

1  
2  
3 trial when the NHS body owes a duty of care to the person harmed, NHS Indemnity will  
4 cover NHS staff, medical academic staff with honorary contracts and those conducting the  
5 trial. NHS Indemnity does not offer no-fault compensation and is unable to agree in  
6 advance to pay compensation for non-negligent harm. Ex-gratia payments may be  
7 considered in the case of a claim.  
8  
9

## 10 11 **13. Ethics and dissemination** 12

### 13 **13.1 Approvals**

14  
15 The trial will be conducted subject to Research Ethics Committee favourable opinion  
16 including any provisions for site specific assessment. The application will be submitted  
17 through the IRAS central allocation system. The approval letter from the ethics committee  
18 and copy of approved patient information leaflets, consent forms and any ethically  
19 approved questionnaires will be present in the site files before initiation of the study and  
20 patient recruitment. Local research governance approvals will be sought from all  
21 participating research sites. This clinical trial will be conducted in accordance with Good  
22 Clinical Practice Guidelines and CTRU standard operating procedures. MHRA approval is  
23 not required for this study.  
24  
25

### 26 27 **13.2 Protocol amendments** 28

29 The investigator will be updated following an amendment to the protocol or study  
30 documents. The new documents, REC approval, R&D approval, HRA assessment letter  
31 and any other appropriate documentation surrounding the amendment will be sent to the  
32 site via a "site file update". The sites will receive the documents with a site file update  
33 sheet, detailing where to file the amended documents and which documents to supersede.  
34 If there are any significant changes to the study procedures or eligibility criteria sites will  
35 be notified by a combination of email, telephone, newsletters or additional project training  
36 when required.  
37  
38

39 In relation to informing REC, if any study documents require amending, the changes will  
40 be discussed with the sponsor and either a substantial (via IRAS and HRA) or minor  
41 amendment (notification via email) will be submitted to REC and HRA. Following REC  
42 acknowledgment and approval (when applicable) other appropriate approvals will be  
43 obtained i.e. HRA and R&D approval.  
44  
45

46 If a protocol amendment requires participants to be re-consented they will be informed of  
47 the amendment by an updated participant information sheet and will be asked to re-consent  
48 to the study. Trial registries, journals and regulators will be updated regarding protocol  
49 amendments when appropriate.  
50  
51

### 52 53 **13.3 Consent**

54 *Consent for the main trial:*

55 The ACTiF trial interventionist or local PI at the site will be responsible for taking informed  
56 consent from potentially eligible trial participants face to face at home or in clinic. Any  
57 researcher or clinical member of the team taking informed consent will be trained in study  
58 procedures and GCP. Participants will have the option to specify whether they are  
59  
60

1  
2  
3 interested in being approached for the qualitative interviews and audio recordings.  
4 However, they do not have to consent to these to be involved in the main study.  
5

#### 6 *Consent for the interviews:*

7  
8 Consent for interviews (participant, interventionist or MDT member) will separately be  
9 taken by the qualitative researcher. Participants can participate in the main trial but choose  
10 to not take part in the qualitative research.  
11

### 12 **13.4 Confidentiality**

13  
14 Participant confidentiality will be respected at all times. Participant names and contact  
15 details will be collected and entered on the prospect database. Access to these personal  
16 details will be restricted to users with appropriate privileges only. All users who do not  
17 require access to identifiable data will only identify data by participant ID number, and no  
18 patient identifiable data will be transferred from the database to the statistician.  
19

20  
21 Trial documents (paper and electronic) will be retained in a secure location during and  
22 after the trial has finished. All source documents will be retained for a period of 5 years  
23 following the end of the trial. Where trial related information is documented in the  
24 medical records – those records will be retained for 5 years after the last patient last visit.  
25 Each site is responsible for ensuring records are archived and the information supplied to  
26 the Chief Investigator.  
27

28  
29 Any participant data held within CFHealthHub will be stored on a secure server at the  
30 University of Manchester. CFHealthHub complies with the Data Protection Act and  
31 follows best practice guidelines on security and information governance. Encrypted  
32 channels are used to transfer any data to and from the web and mobile application  
33 platforms. All user interaction with the CFHealthHub server and each action performed by  
34 a user will be logged. An audit log contains the username of the user performing the action,  
35 the date & time of the action, short description of the action performed. All users are  
36 authenticated via a secure password a with access to the system restricted on a role basis.  
37  
38

### 39 **13.5 Declaration of Interests**

40  
41 Martin Wildman has received funding from Zambon who market the Ineb to carry out  
42 research to understand the performance of the Ineb and in the past we received funding  
43 from Zambon to carry out work to understand barriers to adherence.  
44  
45

### 46 **13.6 Access to data**

47  
48 The central ACTiF study team alone will have access to the final dataset details of which  
49 will be outlined in the study DMP.  
50

### 51 **13.7 Ancillary and post-trial care**

52  
53 Centres will be able to continue to use CFHealthHub if they wish to do so after the end of  
54 the pilot and feasibility study. If so, participants in the control arm will be able to cross  
55 over to use the intervention at this stage.  
56

### 57 **13.8 Dissemination policy**

58  
59 As this is a feasibility study its main interest will be to potential researchers and funding  
60 bodies. Data will be reported according to the revised CONSORT statement (Schultz,  
49

1  
2  
3  
4  
5  
6  
7  
8  
9  
10  
11  
12  
13  
14  
15  
16  
17  
18  
19  
20  
21  
22  
23  
24  
25  
26  
27  
28  
29  
30  
31  
32  
33  
34  
35  
36  
37  
38  
39  
40  
41  
42  
43  
44  
45  
46  
47  
48  
49  
50  
51  
52  
53  
54  
55  
56  
57  
58  
59  
60

2010). The findings of this research will be available to NIHR, patient groups and other interested bodies. It will also be offered for presentation at medical meetings and will be offered for publication in peer reviewed medical journals.

## References

1. Alexander BM, Petren EK, Grimes M, Fink A, Myers V, Sewall A: **Mission of the cystic fibrosis foundation Annual Data Report 2013 Cystic Fibrosis Foundation Patient Registry**. 2014.
2. Southern KW, Barker PM, Solis-Moya A, Patel L: **Macrolide antibiotics for cystic fibrosis**. In *Cochrane Database of Systematic Reviews*. Edited by Southern KW. Chichester, UK: John Wiley & Sons, Ltd; 2011.
3. Ramsey BW, Davies J, McElvaney NG, Tullis E, Bell SC, Dřevínek P, Griese M, McKone EF, Wainwright CE, Konstan MW, Moss R, Ratjen F, Sermet-Gaudelus I, Rowe SM, Dong Q, Rodriguez S, Yen K, Ordoñez C, Elborn JS: **A CFTR Potentiator in Patients with Cystic Fibrosis and the G551D Mutation**. *N Engl J Med* 2011, **365**:1663–1672.
4. McCoy KS, Quittner AL, Oermann CM, Gibson RL, Retsch-Bogart GZ, Montgomery AB: **Inhaled aztreonam lysine for chronic airway Pseudomonas aeruginosa in cystic fibrosis**. *Am J Respir Crit Care Med* 2008, **178**:921–8.
5. Ryan G, Mukhopadhyay S, Singh M: **Nebulised anti-pseudomonal antibiotics for cystic fibrosis**. In *Cochrane Database of Systematic Reviews*. Edited by Ryan G. Chichester, UK: John Wiley & Sons, Ltd; 2003.
6. Jones AP, Wallis C: **Dornase alfa for cystic fibrosis**. In *Cochrane Database of Systematic Reviews*. Edited by Jones AP. Chichester, UK: John Wiley & Sons, Ltd; 2010.
7. Wark P, McDonald VM: **Nebulised hypertonic saline for cystic fibrosis**. In *Cochrane Database of Systematic Reviews*. Edited by Wark P. Chichester, UK: John Wiley & Sons, Ltd; 2009.
8. Ryan G, Singh M, Dwan K: **Inhaled antibiotics for long-term therapy in cystic fibrosis**. In *Cochrane Database of Systematic Reviews*. Edited by Ryan G. Chichester, UK: John Wiley & Sons, Ltd; 2011.
9. Eakin MN, Bilderback A, Boyle MP, Mogayzel PJ, Riekert KA: **Longitudinal association between medication adherence and lung health in people with cystic fibrosis**. *J Cyst Fibros* 2011, **10**:258.
10. Briesacher BA, Quittner AL, Saiman L, Sacco P, Fouayzi H, Quittell LM, Accurso F, Modi A, Lim C, Yu N, Geller D, Wagner M, Quittner A, DiMatteo M, Quittner A, Barker D, Marciel K, Grimley M, Emerson J, Rosenfeld M, McNamara S, Ramsey B, Gibson R, Nixon G, Armstrong D, Carzino R, Carlin J, Olinsky A, Robertson C, Grimwood K, et al.: **Adherence with tobramycin inhaled solution and health care utilization**. *BMC Pulm Med* 2011, **11**:5.
11. AL Q, KA R, Zhang J: **Relationship between adherence to pulmonary medications and health care costs: longitudinal analyses from 2005-2011**. *Pediatr Pulmonol* 2012, **47**:198.
12. Smyth A, Lewis S, Bertenshaw C, Choonara I, McGaw J, Watson A: **Case-control study of acute renal failure in patients with cystic fibrosis in the UK**. *Thorax* 2008, **63**:532–5.



13. McManus P: *Lead Pharmacist - Specialised Services (South Yorkshire and Bassetlaw) NHS England*. .
14. Daniels T, Goodacre L, Sutton C, Pollard K, Conway S, Peckham D: **Accurate assessment of adherence: self-report and clinician report vs electronic monitoring of nebulizers**. *Chest* 2011, **140**:425–32.
15. McNeil S: *Personal Communication from Stephanie McNeil, Chief Statistician of UK CF Registry*. .
16. Horne RW, Barber N, Elliot R, Morgan M: *Concordance, Adherence and Compliance in Medicine Taking: A Conceptual Map and Research Priorities. National Co-ordinating Centre for NHS Service Delivery and Organisational R&D (NCCSDO)*. 2005.
17. Craig P, Dieppe P, Macintyre S, Michie S, Nazareth I, Petticrew M: **Developing and evaluating complex interventions: the new Medical Research Council guidance**. *BMJ* 2008:a1655–a1655.
18. Michie S, van Stralen MM, West R: **The behaviour change wheel: a new method for characterising and designing behaviour change interventions**. *Implement Sci* 2011, **6**:42.
19. Parham R, Thomas S, Mills R, Al. E: **CF patient's beliefs about nebuliser treatment: implications for adherence to treatment**. *J Cyst Fibros* 2012, **11**(Suppl 1):S9.
20. Bucks RS, Hawkins K, Skinner TC, Horn S, Seddon P, Horne R: **Adherence to treatment in adolescents with cystic fibrosis: the role of illness perceptions and treatment beliefs**. *J Pediatr Psychol* 2009, **34**:893–902.
21. George M, Rand-Giovannetti D, Eakin MN, Borrelli B, Zettler M, Riekert KA: **Perceptions of barriers and facilitators: self-management decisions by older adolescents and adults with CF**. *J Cyst Fibros* 2010, **9**:425–32.
22. Dziuban EJ, Saab-Abazeed L, Chaudhry SR, Streetman DS, Nasr SZ: **Identifying barriers to treatment adherence and related attitudinal patterns in adolescents with cystic fibrosis**. *Pediatr Pulmonol* 2010, **45**:450–8.
23. Bregnballe V, Schiøtz PO, Boisen KA, Pressler T, Thastum M: **Barriers to adherence in adolescents and young adults with cystic fibrosis: a questionnaire study in young patients and their parents**. *Patient Prefer Adherence* 2011, **5**:507–15.
24. Modi AC, Quittner AL: **Barriers to treatment adherence for children with cystic fibrosis and asthma: What gets in the way?** *J Pediatr Psychol* 2006, **31**:846–858.
25. Abbott J, Dodd M, Bilton D, Webb AK: **Treatment compliance in adults with cystic fibrosis**. *Thorax* 1994, **49**:115–20.
26. Abbott J, Dodd M, Webb AK: **Health perceptions and treatment adherence in adults with cystic fibrosis**. *Thorax* 1996, **51**:1233–8.
27. Abbott J, Dodd M, Gee L, Webb K: **Ways of coping with cystic fibrosis: implications for treatment adherence**. *Disabil Rehabil* 2001, **23**:315–24.
28. Conway SP, Pond MN, Hamnett T, Watson A: **Compliance with treatment in adult patients with cystic fibrosis**. *Thorax* 1996, **51**:29–33.

- 1  
2  
3 29. Jones S, Curley R, Wildman M: **345 Systematic review of qualitative studies**  
4 **investigating barriers to adherence in patients with cystic fibrosis using framework**  
5 **analysis structured by a conceptual framework of behaviour change.** *J Cyst Fibros* 2013,  
6 **12**(Suppl 1):S136.
- 7  
8  
9 30. Kettler LJ, Sawyer SM, Winefield HR, Greville HW: **Determinants of adherence in**  
10 **adults with cystic fibrosis.** *Thorax* 2002, **57**:459–64.
- 11  
12 31. Lask B: **Non-Adherence to Treatment in Cystic Fibrosis.** *J R Soc Med* 1994, **87**(21  
13 Suppl):25–27.
- 14  
15 32. Latchford G, Duff A, Quinn J, Conway S, Conner M: **Adherence to nebulised**  
16 **antibiotics in cystic fibrosis.** *Patient Educ Couns* 2009, **75**:141–4.
- 17  
18 33. Horne R, Weinman J, Barber N, Elliott R: *Concordance , Adherence and Compliance in*  
19 *Medicine Taking: Report for the National Co-Ordinating Centre for NHS Service Delivery*  
20 *and Organisation R & D (NCCSDO).* London: NCCSDO; 2005.
- 21  
22 34. Ivers N, Jamtvedt G, Flottorp S, Young JM, Odgaard-Jensen J, French SD, O'Brien MA,  
23 Johansen M, Grimshaw J, Oxman AD: **Audit and feedback: effects on professional**  
24 **practice and healthcare outcomes.** *Cochrane database Syst Rev* 2012, **6**:CD000259.
- 25  
26 35. Geraedts H, Zijlstra A, Bulstra SK, Stevens M, Zijlstra W: **Effects of remote feedback in**  
27 **home-based physical activity interventions for older adults: a systematic review.** *Patient*  
28 *Educ Couns* 2013, **91**:14–24.
- 29  
30 36. Cane J, O'Connor D, Michie S: **Validation of the theoretical domains framework for**  
31 **use in behaviour change and implementation research.** *Implement Sci* 2012, **7**:37.
- 32  
33 37. Thabane L, Ma J, Chu R, Cheng J, Ismaila A, Rios LP, Robson R, Thabane M,  
34 Giangregorio L, Goldsmith CH: **A tutorial on pilot studies: the what, why and how.** *BMC*  
35 *Med Res Methodol* 2010, **10**:1.
- 36  
37 38. Baranowski T, Stables G: **Process Evaluations of the 5-a-Day Projects.** *Heal Educ*  
38 *Behav* 2000, **27**:157–166.
- 39  
40 39. Pfadenhauer LM, Mozygemba K, Gerhardus A, Hofmann B, Booth A, Lysdahl KB,  
41 Tummers M, Burns J, Rehfuess EA: **Context and implementation: A concept analysis**  
42 **towards conceptual maturity.** *Z Evid Fortbild Qual Gesundheitswes* 2015, **109**:103–114.
- 43  
44 40. Weber K, Glynn M a.: **Making Sense with Institutions: Context, Thought and Action**  
45 **in Karl Weick's Theory.** *Organ Stud* 2006, **27**:1639–1660.
- 46  
47 41. Hyatt D: **Time for a change: a critical discursual analysis of synchronic context with**  
48 **diachronic relevance.** *Discourse Soc* 2005, **16**:515–534.
- 49  
50 42. Linnan L, Steckler A: **Process evaluation for public health interventions and research:**  
51 **an overview.** In *Process evaluation for public health interventions and research.* 1st edition.  
52 Edited by Linnan L, Steckler A. San Francisco: Jossey-Bass; 2002:1–23.
- 53  
54 43. Moore GF, Audrey S, Barker M, Bond L, Bonell C, Hardeman W, Moore L, O'Cathain A,  
55 Tinati T, Wight D, Baird J: **Process evaluation of complex interventions: Medical**  
56 **Research Council guidance.** *BMJ* 2015, **350**:h1258.
- 57  
58  
59  
60

- 1  
2  
3 44. Nilsen P: **Making sense of implementation theories, models and frameworks.**  
4 *Implement Sci* 2015, **10**:1–13.  
5
- 6 45. Meyers DC, Durlak J a., Wandersman A: **The Quality Implementation Framework: A**  
7 **Synthesis of Critical Steps in the Implementation Process.** *Am J Community Psychol* 2012,  
8 **50**:462–480.  
9
- 10 46. Borrelli B: **The Assessment, Monitoring, and Enhancement of Treatment Fidelity In**  
11 **Public Health Clinical Trials.** *J Public Health Dent* 2011, **71**:S52–S63.  
12
- 13 47. Fuchs HJ, Borowitz DS, Christiansen DH, Morris EM, Nash ML, Ramsey BW,  
14 Rosenstein BJ, Smith AL, Wohl ME: **Effect of aerosolized recombinant human DNase on**  
15 **exacerbations of respiratory symptoms and on pulmonary function in patients with**  
16 **cystic fibrosis. The Pulmozyme Study Group.** *N Engl J Med* 1994, **331**:637–42.  
17  
18
- 19 48. Ratjen F, Durham T, Navratil T, Schaberg A, Accurso FJ, Wainwright C, Barnes M, Moss  
20 **RB: Long term effects of denufosal tetrasodium in patients with cystic fibrosis.** *J Cyst*  
21 *Fibros* 2012, **11**:539–49.  
22
- 23 49. Miller MR, Hankinson J, Brusasco V, Burgos F, Casaburi R, Coates A, Crapo R, Enright  
24 P, van der Grinten CPM, Gustafsson P, Jensen R, Johnson DC, MacIntyre N, McKay R,  
25 Navajas D, Pedersen OF, Pellegrino R, Viegi G, Wanger J: **Standardisation of spirometry.**  
26 *Eur Respir J* 2005, **26**:319–38.  
27  
28
- 29 50. Herdman M, Gudex C, Lloyd A, Janssen M, Kind P, Parkin D, Bonnel G, Badia X:  
30 **Development and preliminary testing of the new five-level version of EQ-5D (EQ-5D-**  
31 **5L).** *Qual Life Res* 2011, **20**:1727–36.  
32
- 33 51. Hibbard JH, Mahoney ER, Stockard J, Tusler M: **Development and testing of a short**  
34 **form of the patient activation measure.** *Health Serv Res* 2005, **40**(6 Pt 1):1918–30.  
35
- 36 52. Wong MD, Sarkisian C a., Davis C, Kinsler J, Cunningham WE: **The Association**  
37 **Between Life Chaos, Health Care Use, and Health Status Among HIV-Infected Persons.**  
38 *J Gen Intern Med* 2007, **22**:1286–1291.  
39
- 40 53. Verplanken B, Orbell S: **Reflections on Past Behavior: A Self-Report Index of Habit**  
41 **Strength1.** *J Appl Soc Psychol* 2003, **33**:1313–1330.  
42
- 43 54. Quittner a L, Sweeny S, Watrous M, Munzenberger P, Bearss K, Gibson Nitza a, Fisher  
44 L a, Henry B: **Translation and linguistic validation of a disease-specific quality of life**  
45 **measure for cystic fibrosis.** *J Pediatr Psychol* 2000, **25**:403–14.  
46  
47
- 48 55. Kroenke K, Strine TW, Spitzer RL, Williams JBW, Berry JT, Mokdad AH: **The PHQ-8**  
49 **as a measure of current depression in the general population.** *J Affect Disord* 2009,  
50 **114**:163–173.  
51
- 52 56. Spitzer RL, Kroenke K, Williams JBW, Löwe B: **A brief measure for assessing**  
53 **generalized anxiety disorder: the GAD-7.** *Arch Intern Med* 2006, **166**:1092–7.  
54
- 55 57. Horne R, Weinman J, Hankins M: **The beliefs about medicines questionnaire: The**  
56 **development and evaluation of a new method for assessing the cognitive representation**  
57 **of medication.** *Psychol Health* 1999, **14**:1–24.  
58
- 59 58. Lancaster GA, Dodd S, Williamson PR: **Design and analysis of pilot studies:**  
60

1  
2  
3 **recommendations for good practice.** *J Eval Clin Pract* 2004, **10**:307–12.  
4

5 59. Arain M, Campbell MJ, Cooper CL, Lancaster GA: **What is a pilot or feasibility study?**  
6 **A review of current practice and editorial policy.** *BMC Med Res Methodol* 2010, **10**:67.  
7

8 60. Eldridge S, Bond C, Campbell M, Lancaster G, Thabane L, Hopwell S: **Definition and**  
9 **reporting of pilot and feasibility studies.** *Trials* 2013, **14**(Suppl 1):O18.  
10

11 61. Schulz KF, Altman DG, Moher D: **CONSORT 2010 statement: Updated guidelines for**  
12 **reporting parallel group randomized trials.** *Annu Intern Med* 2010, **152**:726–732.  
13

14 62. Ritchie J, Spencer L: **Qualitative data analysis for applied policy research.** In  
15 *Analysing qualitative data.* Edited by Bryman A, Burgess RG. Routledge; 1994:173–194.  
16

17 63. Horne R: **Treatment perceptions and self-regulation.** In *The Self-regulation of Health*  
18 *and Illness Behaviour.* Edited by Cameron L, Leventhal H. London: Routledge; 2003:138–53.  
19

20 64. Moore GF, Audrey S, Barker M, Bond L, Bonell C, Hardeman W, Moore L, O’Cathain A,  
21 Tinati T, Wight D, Baird J: **Process evaluation of complex interventions: Medical**  
22 **Research Council guidance.** *BMJ* 2015, **350**(mar19 6):h1258–h1258.  
23

24 65. Farmer T, Robinson K, Elliott SJ, Eyles J: **Developing and implementing a**  
25 **triangulation protocol for qualitative health research.** *Qual Health Res* 2006, **16**:377–94.  
26

27 66. O’Cathain A, Murphy E, Nicholl J, Cathain AO: **Three techniques for integrating data**  
28 **in mixed methods studies.** *BMJ* 2010, **341**(sep17 1):c4587–c4587.  
29  
30  
31  
32  
33  
34  
35  
36  
37  
38  
39  
40  
41  
42  
43  
44  
45  
46  
47  
48  
49  
50  
51  
52  
53  
54  
55  
56  
57  
58  
59  
60

## Appendix 1. W.H.O. Trial Registration Data Set

| DATA CATEGORY                                 | INFORMATION                                                                                                                                                                                                                                           |
|-----------------------------------------------|-------------------------------------------------------------------------------------------------------------------------------------------------------------------------------------------------------------------------------------------------------|
| Primary registry and trial identifying number | To be added                                                                                                                                                                                                                                           |
| Date of registration in primary registry      | To be added                                                                                                                                                                                                                                           |
| Secondary identifying numbers                 | NIHR: RP-PG-1212-20015<br>Sponsor (STH): STH19213                                                                                                                                                                                                     |
| Source(s) of monetary or material support     | National Institute for Health Research (NIHR) Programme Grants for Applied Research programme.                                                                                                                                                        |
| Primary sponsor                               | Sheffield Teaching Hospitals NHS Foundation Trust.                                                                                                                                                                                                    |
| Secondary sponsor(s)                          | none                                                                                                                                                                                                                                                  |
| Contact for public queries                    | Chin Maguire<br>Trial Manager<br>Clinical Trials Research Unit<br>University of Sheffield<br>Regent Court<br>30 Regent Street<br>Sheffield<br>S1 4DA<br>Tel: (+44) (0)114 222 0717<br>Fax: (+44) (0)114 222 0870<br>email : c.maguire@sheffield.ac.uk |
| Contact for scientific queries                | Dr Martin Wildman<br>Adult CF Centre<br>Northern General Hospital<br>Herries Road<br>Sheffield<br>S5 7AU<br>Tel: (0114) 2715212<br>Fax: (0114) 222 0870<br>email : <a href="mailto:Martin.Wildman@sth.nhs.uk">Martin.Wildman@sth.nhs.uk</a>           |
| Public title                                  | <u>Adherence to treatment in adults with Cystic Fibrosis (ACtiF)</u>                                                                                                                                                                                  |
| Scientific title                              | Development and evaluation of an intervention to support Adherence to treatment in adults with Cystic Fibrosis : a feasibility study comprised of an external pilot randomised controlled trial and process evaluation                                |
| Countries of recruitment                      | United Kingdom                                                                                                                                                                                                                                        |
| Health condition(s) or problem(s) studied     | Cystic Fibrosis                                                                                                                                                                                                                                       |
| Intervention(s)                               | Usual care plus a microchipped nebuliser with or without a complex intervention. The complex intervention consists of:                                                                                                                                |

|                                      |                                                                                                                                                                                                                                                                                                                                                                                                                                                                                                                                                                                                                                                                                                      |
|--------------------------------------|------------------------------------------------------------------------------------------------------------------------------------------------------------------------------------------------------------------------------------------------------------------------------------------------------------------------------------------------------------------------------------------------------------------------------------------------------------------------------------------------------------------------------------------------------------------------------------------------------------------------------------------------------------------------------------------------------|
|                                      | <ul style="list-style-type: none"> <li>- A software platform, CFHealthHub mobile apps and website, which allows access to medication adherence data and education modules intended to remove barriers to adherence</li> <li>- A manual containing a 'behaviour change toolkit' to guide interactions between health</li> </ul>                                                                                                                                                                                                                                                                                                                                                                       |
| Key inclusion and exclusion criteria | <p>Inclusion criteria for participants</p> <ol style="list-style-type: none"> <li>1.Diagnosed with CF and with data within the CF registry</li> <li>2.Aged 16 years and above</li> <li>3.Taking inhaled mucolytics or antibiotics via a chipped nebuliser (e.g. eTrack or Bi-Neb) or able and willing to take via eTrack or Bi-Neb.</li> </ol> <p>Exclusion criteria for participants</p> <ol style="list-style-type: none"> <li>1.Post-lung transplant</li> <li>2.People on the active lung transplant list</li> <li>3.Patients receiving palliative care,</li> <li>4.Lacking in capacity to give informed consent</li> <li>5.Using dry powder devices to take antibiotics or mucolytics</li> </ol> |
| Study type                           | Feasibility study comprised of an external pilot randomised controlled trial and process evaluation                                                                                                                                                                                                                                                                                                                                                                                                                                                                                                                                                                                                  |
| Date of first enrolment              | Anticipated: 02/05/2016                                                                                                                                                                                                                                                                                                                                                                                                                                                                                                                                                                                                                                                                              |
| Target sample size                   | We propose to recruit to time, that is for a fixed period of four months rather than to a fixed sample size. To match the proposed recruitment rate of the main RCT, the target sample over the four months for which the pilot RCT is open, will be n=64.                                                                                                                                                                                                                                                                                                                                                                                                                                           |
| Recruitment status                   | Not yet open.                                                                                                                                                                                                                                                                                                                                                                                                                                                                                                                                                                                                                                                                                        |
| Primary outcome(s)                   | Exacerbations of cystic fibrosis as defined by the Fuchs criteria ( <i>N Engl J Med</i> 1994, 331:637–42.)                                                                                                                                                                                                                                                                                                                                                                                                                                                                                                                                                                                           |
| Key secondary outcomes               | None.                                                                                                                                                                                                                                                                                                                                                                                                                                                                                                                                                                                                                                                                                                |

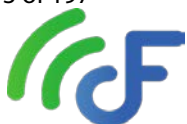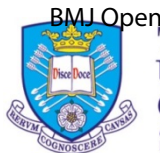

**ACtiF Pilot Study**

**Control Patient Topic guide**

*Thank you for agreeing to take part in the interview today*

*Check timing ok*

*Check consent form filled in / received*

*Are you happy for the interview to be recorded?*

*We're interested in your experiences of the service that you receive for helping you to use your nebuliser.*

1. Why did you decide to take part in the research?
2. How did you find being asked to take part in the trial? [Prompts: paperwork volume, information provided, questionnaires]

**Now I'd like to ask you about the care you received before the trial started to help you use your nebuliser.**

3. What types of things did the unit/hospital recommend that you do to help you use your nebuliser? [Prompts: appointments / what do you talk about? / nebulisers / skills to use your nebuliser properly / knowledge and beliefs?]
4. What types of things did the unit/hospital recommend that you do to help you use your nebuliser as much as possible? [Prompts: setting goals, solving problems, making plans, giving you information, building skills, beliefs about nebuliser medication, giving you confidence]
5. How did the care you received to help you use your nebuliser fit with any other care you received for CF more generally?

- 1  
2  
3 6. How could the care you received for helping you to use your nebuliser as prescribed be  
4 improved?  
5  
6  
7  
8  
9 7. Overall how happy are you with the care you received for your nebuliser? [Prompts: what  
10 could be done better?]  
11  
12

13  
14 **Now I want to ask you about specific kinds of things that might have changed since the trial**  
15 **started:**  
16

- 17  
18  
19  
20 8. Since you joined the trial has the care that you receive in the unit / hospital changed at all?  
21 [Prompts: Has anybody done anything different? What have they done?]  
22  
23  
24  
25 9. Since you joined the trial has anyone asked you to change how you use your nebuliser? If so,  
26 what have they suggested you do? [Prompt: capability skills / knowledge including beliefs /  
27 where has the change come from?]  
28  
29  
30  
31  
32 10. Since you joined the trial has anyone suggested ways to help you use your nebuliser as much  
33 as possible? If so what? [Prompt: opportunity finding time to use nebuliser / making plans /  
34 setting goals / where has the change come from?]  
35  
36  
37  
38  
39 11. Since you joined the trial has anyone helped you have more confidence to use your  
40 nebuliser as prescribed? [Prompt: where has the change come from? what have they done?]  
41  
42  
43  
44  
45

46 **Is there anything else that we haven't talked about that you'd like to comment on?**  
47  
48  
49  
50  
51

52  
53 **THANK YOU**  
54  
55  
56

57 *The ACTiF Project is funded by the National Institute for Health Research's Programme Grants for*  
58 *Applied Research.*  
59  
60



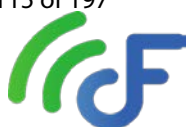

**ACTiF Pilot Study**

**Intervention Patient Topic guide**

*Thank you for agreeing to take part in the interview today*

*Check timing ok*

*Check consent form filled in / received*

*Are you happy for the interview to be recorded?*

*We're interested in your experiences of the service that you have received from CFHealthHub including both the meetings to discuss your nebuliser medication and the website/app you have used.*

1. Why did you decide to take part in the research?
2. How did you find being asked to take part in the trial? [Prompts: recruitment, paperwork volume, information provided, questionnaires]

**Now I'd like to ask you about your meetings with the person who has been working with you on CFHealthHub.**

3. What types of things did they recommend that you do? [prompts: setting goals, solving problems, making plans (myplan), giving you information]
4. Do you think you have had any benefit from these meetings?
  - If yes**, what benefit and what about the service helped you to get this?
  - If no**, what has stopped you gaining benefit?
5. What was good about how the meetings were delivered? [Prompt: what needs to be improved?]

1  
2  
3 **Now I'd like to talk to you about the CFHealthHub website / app.**  
4

- 5 6. What was good about the website? [Prompts: my plan, how am I doing, tool kit, graphs, my  
6 treatment]  
7  
8  
9  
10  
11 7. What needs to be improved? [Prompts: my plan, how am I doing, tool kit, graphs, my  
12 treatment]  
13  
14  
15  
16 8. Do you think you've had any benefit from using the website?  
17  
18 **If yes**, what benefit and what about the website helped you to get this?  
19  
20 **If no**, what has stopped you gaining benefit?  
21  
22  
23  
24  
25 9. Have the website and/or meetings helped you to improve how often you use your  
26 nebuliser?  
27  
28 **If yes**, how has it helped you to do this?  
29  
30 **If not**, why not?  
31  
32  
33  
34  
35 10. How do the CFHealthHub website and the meetings work together?  
36  
37  
38  
39 11. Has using CFHealthHub helped you to be able to use your nebuliser any better? Why / Why  
40 not? [Prompt: capability skills / knowledge including beliefs]  
41  
42  
43  
44 12. Has using CFHealthHub helped you to find the time to use your nebuliser more? Why / why  
45 not? [Prompt: opportunity / making plans]  
46  
47  
48  
49 13. Has using CFHealthHub made you want to use your nebuliser more? Why / why not?  
50 [Prompt: motivation and confidence]  
51  
52  
53  
54  
55 14. How does the CFHealthHub service (website and meetings) fit with the care you were  
56 already receiving at the unit/hospital?  
57  
58  
59  
60

1  
2  
3 15. Do you think you would continue using CFHealthHub? [Prompt: during the study / after the  
4 study]  
5

6  
7  
8  
9 16. Is CFHealthHub a good thing to use in general for people with CF? Why? / Why not?  
10

11  
12  
13 17. How have you found being part of the study?  
14

15  
16  
17 Is there anything else that we haven't talked about that you'd like to comment on?  
18  
19

20  
21 **THANK YOU**  
22  
23  
24  
25  
26  
27  
28  
29  
30  
31  
32  
33  
34  
35  
36  
37  
38  
39  
40  
41  
42  
43  
44  
45  
46  
47  
48  
49  
50  
51  
52  
53  
54  
55

56 *The ACTiF Project is funded by the National Institute for Health Research's Programme Grants for*  
57 *Applied Research.*  
58  
59  
60

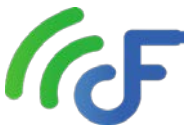

**ACTIF Pilot Study**

**Interventionist Topic guide**

Thank you for agreeing to take part in the interview today.

Check timing ok

Check consent form filled in / received

Are you happy for the interview to be recorded?

Introduction to the interview: Interested in how you've found using CFHealthhub (CFHH) with your participants and any learning from it

**The trial**

1. What works or could be improved about:
  - a) recruiting patients to the trial?
  - b) collecting data?
  - c) any other aspect?

**The intervention:**

**Now I'd like to go through each of the steps for providing the intervention to get your views on each of these**

2. What works or could be improved about:
  - a) how you have assessed participants' adherence levels prior to using CFHH?
  - b) how you set up appointments with your participants?
  - c) session 1? [Prompts: gathering data, introducing the nebuliser, entering prescription data into CFHH, completion of screening tools, patient feedback, anything else]

1  
2  
3 d) session 2? [Prompts: reviewing adherence data, introducing CFHH, explaining  
4 modules, setting goals, action planning, identifying suitable tailored content, technical  
5 issues, anything else]  
6  
7

8  
9 e) session 3? [Prompts: reviewing goals, reviewing adherence plans, motivation,  
10 problem solving, anything else]  
11  
12

13  
14 3. What works or could be improved about the training manuals and training sessions?  
15  
16

17 4. What works or could be improved about the support available from the research  
18 team? [Prompts: timing, availability, problem solving].  
19

20 **[Specific prompt for MDT senior interventionist: do you think the training has**  
21 **equipped you to deliver this intervention in your centre yourself after the trial ends? If**  
22 **no, what further training would be needed?]**  
23  
24

25  
26  
27 5. How has the CFHH intervention been received by the rest of the team? [Prompt: how  
28 has your communication been with the rest of the team about CFHH?]  
29

30  
31 6. What sort of follow-up did participants request? How will you handle this?  
32  
33

34  
35 7. How has the CFHH intervention helped your participants to know how to use their  
36 nebuliser? [Prompt: capability / skills, knowledge and beliefs]  
37  
38

39  
40 8. How has the CFHH intervention helped your participants find ways to use their  
41 nebuliser more? [Prompt: opportunity]  
42  
43

44  
45 9. How has the CFHH intervention helped to motivate your participants to use their  
46 nebuliser? [Prompt: motivation / confidence]  
47  
48

49  
50 **General questions:**  
51

52  
53  
54 10. How engaged did participants seem with CFHH? [Prompt: What feedback if any have  
55 you had from participants about CFHH?]  
56  
57

58  
59 11. How useful do you think CFHH is for your participants?  
60

1  
2  
3 12. How easy / difficult has it been to get your participants to use CFHH?  
4  
5

6 13. Have you seen any changes to the ways in which your participants use their  
7 nebulisers since starting CFHH?  
8  
9

10  
11 14. What have you learnt from using CFHH with your participants?  
12  
13

14 15. What if any are the benefits to you and / or to your participants of using CFHH?  
15  
16

17 16. How do you think CFHH fits with the other care offered by the centre?  
18  
19

20 17. How have you found being part of the trial?  
21  
22

23  
24  
25 Is there anything else you'd like to say about CFHH?  
26  
27  
28  
29

30 **THANK YOU**  
31  
32  
33  
34  
35  
36  
37  
38  
39  
40  
41  
42  
43  
44  
45  
46  
47  
48  
49  
50  
51  
52  
53  
54  
55  
56

57 *The ACTiF Project is funded by the National Institute for Health Research's Programme Grants for*  
58 *Applied Research.*  
59  
60

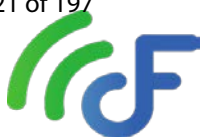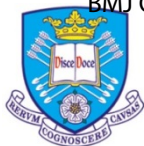

**ACTiF Pilot Study**

**MDT Topic guide**

*Thank you for agreeing to take part in the interview today.*

*Check timing ok*

*Check consent form filled in / received*

*Are you happy for the interview to be recorded?*

*We're interested in your views of the CFHealthHub service and how it fits into the care provided in your centre.*

1. Can you describe the key things you did in your centre to help patients adhere to their nebulisers prior to the ACTiF study?
2. How does nebuliser adherence fit with the other things you do for CF patients?
3. What involvement have you had in the CFHealthHub intervention? [Prompts: website, interventionist, training of staff]
4. You had training to help you be more aware of patient activation. What did you think of the training? [Prompts: Do you think it has changed your practice in any way? If yes what changes, if no why not? Key aspects – patient knowledge including beliefs / skills / confidence]
5. Do you think CFHealthHub is a useful intervention? Why? / Why not? [Prompts: what do you think about the: website, feedback about adherence data, interventionist, training?]
6. How do you think the CFHealthHub intervention is operating in practice? [Prompt: what are the strengths / improvements needed?]
7. How does the CFHealthHub intervention fit with the care offered by your centre?
8. How does the CFHealthHub intervention help your patients to know how to use their nebuliser? [Prompts: Skills / knowledge / beliefs. How / Why doesn't it help?]
9. How does the CFHealthHub intervention help your patients to find ways to use their nebuliser more? [Prompts: How / Why doesn't it help?]

1  
2  
3 10. How does the CFHealthHub intervention help to motivate your patients to use their nebuliser?  
4 [Prompts: How / Why doesn't it help?]  
5  
6

7  
8 11. Do you think CFHealthHub is helping your intervention patients to improve their adherence? If  
9 yes, what key things have helped this? If no, what if anything could be done to help this?  
10

11  
12 12. Has the CFHealthHub intervention changed anything about the way in which you and/or your  
13 team approach adherence in your centre?  
14

15 i) for patients receiving the intervention?  
16

17 ii) for patients not receiving the intervention?  
18

19 [Prompts: MDT discussions / differences between control and intervention patients]  
20  
21

22 13. Which patient groups are most likely to benefit from CFHealthHub? Why?  
23  
24

25 14. Which patient groups are least likely to benefit from CFHealthHub? Why?  
26  
27

28 15. Would you consider continuing to use CFHealthHub in the future? Why? Why not?  
29  
30

31 16. How has it been for you / your centre taking part in the trial? [Prompt: recruitment to the study]  
32  
33

34 17. How able do you feel to go on delivering care related to improving adherence after the study  
35 ends? [Prompt: has the study changed the way you will go about this?]  
36  
37

38 18. Are there any aspects of the research that we haven't talked about that you'd like to comment  
39 on?  
40  
41

42  
43  
44 Is there anything else you'd like to say?  
45  
46  
47

48  
49 **THANK YOU**  
50  
51  
52  
53  
54  
55

56  
57 *The ACTiF Project is funded by the National Institute for Health Research's Programme Grants for*  
58 *Applied Research.*  
59  
60



## Additional File 03 - Quantitative results from process evaluation

**Table a. Key dates in process evaluation by participant**

| Study ID | Interview Date | Baseline date | 5 month follow up date | Date of first intervention meeting | Time in the trial at interview (days) | Time since first intervention session at interview (days) | Time in trial at follow up (days) |
|----------|----------------|---------------|------------------------|------------------------------------|---------------------------------------|-----------------------------------------------------------|-----------------------------------|
| R02/02   | 13/09/2016     | 06/07/2016    | 10/11/2016             | 05/08/2016                         | 69                                    | 39                                                        | 127                               |
| R02/03   | 09/09/2016     | 08/07/2016    | NA                     | 05/08/2016                         | 63                                    | 35                                                        | NA                                |
| R02/42   | 12/10/2016     | 15/07/2016    | 21/12/2016             | NA                                 | 89                                    | NA                                                        | 159                               |
| R02/07   | 15/11/2016     | 12/07/2016    | 12/12/2016             | 09/09/2016                         | 126                                   | 67                                                        | 153                               |
| R02/12   | 02/11/2016     | 14/07/2016    | 03/01/2017             | 05/10/2016                         | 111                                   | 28                                                        | 173                               |
| R02/52   | 03/02/2017     | 04/07/2016    | 22/11/2016             | 05/10/2016                         | 214                                   | 121                                                       | 141                               |
| R01/44   | 01/12/2016     | 07/07/2016    | 16/11/2016             | 08/11/2016                         | 147                                   | 23                                                        | 132                               |

|        |            |            |            |            |     |     |     |
|--------|------------|------------|------------|------------|-----|-----|-----|
| R01/48 | 17/01/2017 | 04/07/2016 | 15/11/2016 | 13/10/2016 | 197 | 96  | 134 |
| R01/49 | 30/01/2017 | 22/07/2016 | 07/12/2016 | 10/10/2016 | 192 | 112 | 138 |
| R01/54 | 21/03/2017 | 25/07/2016 | 13/12/2016 | 02/11/2016 | 239 | 139 | 141 |
| R01/39 | 27/02/2017 | 02/08/2016 | 21/12/2016 | 03/11/2016 | 209 | 116 | 141 |
| R01/02 | 06/12/2016 | 31/08/2016 | 25/01/2017 | 15/08/2016 | 97  | 113 | 147 |
| R01/40 | 05/12/2016 | 05/09/2016 | 17/02/2017 | 05/10/2016 | 91  | 61  | 165 |
| R01/42 | 03/10/2016 | 12/09/2016 | 15/02/2017 | 15/08/2016 | 21  | 49  | 156 |

For peer review only

**Table b. Interventionist-generated motivation data (intervention arm)** R02/42, R02/49, R02/15 and R01/48 were all missing

| Participant ID | Date           | Consent Visit Motivation Rating | Was Participant motivation too low Answer Yes/No |
|----------------|----------------|---------------------------------|--------------------------------------------------|
| R02/39         | 05.08.16       | 7                               | No                                               |
| R02/40         | 23.08.16       | 4                               | No                                               |
| R02/02         | 05.08.16       | 7                               | No                                               |
| R02/03         | 03.08.16       | 1                               | No                                               |
| R02/43         | 12.08.16       | 7                               | No                                               |
| R02/05         | 22.08.16       | 5                               | No                                               |
| R02/45         | 18.08.16       | 7                               | No                                               |
| R02/07         | 09.08.16       | 7                               | No                                               |
| R02/48         | 05.10.16       | 7                               | No                                               |
| R02/10         | 14.09.16       | 7                               | No                                               |
| R02/11         | 28.09.16       | 7                               | No                                               |
| R02/50         | 26.09.16       | 7                               | No                                               |
| R02/12         | 05.10.16       | 7                               | No                                               |
| R02/52         | 03.10.16       | 7                               | No                                               |
| R01/39         | 03.11.16       | 7                               | Page missing from report                         |
| R01/02         | 16.09.16       | 7                               | No                                               |
| R01/03         | 03.10.16       | 5                               | No                                               |
| R01/40         | 05.10.16       | 7                               | Page missing from report                         |
| R01/42         | 15.08.16       | 5                               | Page missing from report                         |
| R01/44         | 08.11.16       | 7                               | Page missing from report                         |
| R01/47         | 10.10.16       | 5                               | Yes                                              |
| R01/06         | 10.10.16       | 7                               | Page missing from report                         |
| R01/49         | 17.10.16       | 7                               | No                                               |
| R01/08         | 01.11.16       | 7                               | Page missing from report                         |
| R01/50         | Missing report |                                 |                                                  |
| R01/53         | 29.11.16       | 7                               | Not ticked                                       |
| R01/54         | Missing report |                                 |                                                  |
| R01/10         | 10.11.16       | 2                               | Not ticked                                       |
| R01/57         | 31.10.16       | 0                               | Yes                                              |

**Table c. Engagement**

|                                  | Adherence data collected (did not withdraw from data collection before 6m) n(%) | Total CFHH sessions Median (IQR) | Baseline adherence Median (IQR) |
|----------------------------------|---------------------------------------------------------------------------------|----------------------------------|---------------------------------|
| <b>Overall (n=33)</b>            | 29(88%)                                                                         | 3(1,8)                           | 20(2.1,47.8)                    |
| <b>Qualitative case studies</b>  |                                                                                 |                                  |                                 |
| <b>High adherence at end</b>     |                                                                                 |                                  |                                 |
| R01/39                           | Yes                                                                             | 1                                | 0                               |
| R02/07                           | Yes                                                                             | 2                                | 96.7                            |
| R01/40                           | Yes                                                                             | 9                                | 43.1                            |
| R02/52                           | Yes                                                                             | 13                               | 96.6                            |
| <b>Moderate adherence at end</b> |                                                                                 |                                  |                                 |
| R01/49                           | Yes                                                                             | 4                                | 13.2                            |
| <b>Low adherence at end</b>      |                                                                                 |                                  |                                 |
| R01/54                           | Yes                                                                             | 11                               | 44.8                            |
| R01/02                           | Yes                                                                             | 1                                | 30.2                            |
| R01/48                           | Yes                                                                             | 3                                | 1.8                             |
| R02/12                           | Yes                                                                             | 44                               | 10.2                            |
| R02/03                           | No                                                                              | 3                                | 5.4                             |
| R01/44                           | Yes                                                                             | 1                                | 19.5                            |
| <b>Withdrawn</b>                 |                                                                                 |                                  |                                 |
| R01/42                           | Yes                                                                             | 41                               | 21.1                            |
| R02/02                           | No                                                                              | 3                                | 92.5                            |
| R02/42                           | No                                                                              | 0                                | 4.2                             |

Note: R02/42, R02/02 withdrew from adherence data collection and from the intervention and R02/03 was lost to follow-up. R01/42 did not withdraw from data collection until the end of the study; they did not contribute sufficient data for the 150-180 day period.

**Table d. Activities: all participants**

|                                                | Self-monitoring adherence | Tailored education about treatment | Tailored patient stories (videos) | Personalised action plan/Personalised goal-setting | Tailored problem-solving  | Goal review; Rewards  |                                      |
|------------------------------------------------|---------------------------|------------------------------------|-----------------------------------|----------------------------------------------------|---------------------------|-----------------------|--------------------------------------|
|                                                | Clicks<br>How am I doing? | Clicks<br>Toolkit                  | Clicks<br>Videos                  | Clicks<br>Action Plan                              | Clicks<br>Problem Solving | Clicks<br>Coping Plan | Review sessions with Interventionist |
| <b>Mean (SD)†/Median* (IQR) overall (n=33)</b> | 11(5, 30)*                | 3(0, 7)*                           | 2(1, 3)*                          | 2(1, 7)*                                           | 3(0, 8)*                  | 1(0, 3)*              | 1(0.5)†                              |
| <b>Qualitative case studies</b>                |                           |                                    |                                   |                                                    |                           |                       |                                      |
| <b>High adherence at end</b>                   |                           |                                    |                                   |                                                    |                           |                       |                                      |
| R01/39                                         | 8                         | 3                                  | 1                                 | 1                                                  | 0                         | 1                     | 1                                    |
| R02/07                                         | 5                         | 1                                  | 1                                 | 1                                                  | 2                         | 0                     | 1                                    |
| R01/40                                         | 52                        | 0                                  | 1                                 | 1                                                  | 3                         | 0                     | 1                                    |
| R02/52                                         | 70                        | 5                                  | 3                                 | 1                                                  | 17                        | 1                     | 1                                    |
| <b>Medium adherence at end</b>                 |                           |                                    |                                   |                                                    |                           |                       |                                      |
| R01/49                                         | 30                        | 2                                  | 1                                 | 0                                                  | 1                         | 0                     | 1                                    |
| <b>Low adherence at end</b>                    |                           |                                    |                                   |                                                    |                           |                       |                                      |
| R01/54                                         | 24                        | 4                                  | 5                                 | 3                                                  | 4                         | 2                     | 1                                    |
| R01/02                                         | 3                         | 0                                  | 1                                 | 2                                                  | 0                         | 1                     | 2                                    |
| R01/48                                         | 38                        | 6                                  | 2                                 | 7                                                  | 7                         | 1                     | 1                                    |
| R02/12                                         | 98                        | 12                                 | 10                                | 13                                                 | 14                        | 8                     | 1                                    |
| R02/03                                         | 15                        | 12                                 | 1                                 | 25                                                 | 1                         | 14                    | 1                                    |
| R01/44                                         | 11                        | 0                                  | 2                                 | 4                                                  | 8                         | 3                     | 1                                    |
| <b>Withdrawn</b>                               |                           |                                    |                                   |                                                    |                           |                       |                                      |
| R01/42                                         | 69                        | 18                                 | 9                                 | 16                                                 | 20                        | 3                     | 2                                    |
| R02/02                                         | 3                         | 7                                  | 1                                 | 8                                                  | 8                         | 7                     | 1                                    |
| R02/42                                         | 0                         | 0                                  | 0                                 | 0                                                  | 0                         | 0                     | 0                                    |

**Table e. Activities: highly motivated participants**

(Those who answered 'No' to question, 'Was the participant motivation too low) n=17. Some of these were missing or not answered n=14, only 2 answered 'Yes'.

|                                                                | Self-monitoring adherence | Tailored education about treatment | Tailored patient stories (videos) | Personalised action plan/Personalised goal-setting | Tailored problem-solving | Goal review; Rewards |                                      |
|----------------------------------------------------------------|---------------------------|------------------------------------|-----------------------------------|----------------------------------------------------|--------------------------|----------------------|--------------------------------------|
|                                                                | Clicks How am I doing?    | Clicks Toolkit                     | Clicks Videos                     | Clicks Action Plan                                 | Clicks Problem Solving   | Clicks Coping Plan   | Review sessions with Interventionist |
| <b>High motivation Mean (SD)†/Median* (IQR) overall (n=17)</b> | 16 (5 33)*                | 5 (2 ,12)*                         | 3 (1 , 4)*                        | 4 (2 , 12)*                                        | 4(2 , 11)*               | 1(1 , 7)*            | 1.12(0.33)†                          |
| <b>Qualitative case studies (high motivation)</b>              |                           |                                    |                                   |                                                    |                          |                      |                                      |
| <b>R02/07</b>                                                  | 5                         | 1                                  | 1                                 | 1                                                  | 2                        | 0                    | 1                                    |
| <b>R02/52</b>                                                  | 70                        | 5                                  | 3                                 | 1                                                  | 17                       | 1                    | 1                                    |
| <b>R01/49</b>                                                  | 30                        | 2                                  | 1                                 | 0                                                  | 1                        | 0                    | 1                                    |
| <b>R01/02</b>                                                  | 3                         | 0                                  | 1                                 | 2                                                  | 0                        | 1                    | 2                                    |
| <b>R02/12</b>                                                  | 98                        | 12                                 | 10                                | 13                                                 | 14                       | 8                    | 1                                    |
| <b>R02/03</b>                                                  | 15                        | 12                                 | 1                                 | 25                                                 | 1                        | 14                   | 1                                    |
| <b>R02/02</b>                                                  | 3                         | 7                                  | 1                                 | 8                                                  | 8                        | 7                    | 1                                    |

Table f. Process Outcomes

|                                 | Accurate awareness of adherence                                       | Increased Motivation                                                                         | Increased necessity and decreased concern / beliefs Motivation |                                    | Increased self-efficacy /                                                                               | Motivation                             | Increased habit /            | Reduced CHAOS                | Reduced barriers                           |
|---------------------------------|-----------------------------------------------------------------------|----------------------------------------------------------------------------------------------|----------------------------------------------------------------|------------------------------------|---------------------------------------------------------------------------------------------------------|----------------------------------------|------------------------------|------------------------------|--------------------------------------------|
|                                 | Subjective adherence (0-100): Medication Adherence Data Questionnaire | Change in BMQ question 'I want to do all my prescribed medications in the next 2 weeks (0-7) | Change in BMQ Necessities score (2-5)                          | Change in BMQ Concerns score (1-3) | Change in BMQ question 'I am confident I can do all my prescribed medications in the next 2 weeks (0-7) | Change in PAM activation score (0-100) | Change in SRBAI score (0-28) | Change in CHAOS score (0-24) | Change in no. of BMQ barriers ticked (0-6) |
| <b>n Overall</b>                | 30                                                                    | 31                                                                                           | 31                                                             | 31                                 | 31                                                                                                      | 31                                     | 31                           | 31                           | 31                                         |
| <b>Mean (SD) overall</b>        | 2.07(27.87)                                                           | -0.1(1.27)                                                                                   | 0.26(0.58)                                                     | -0.19(0.31)                        | 0.06(1.79)                                                                                              | 2.38(14.01)                            | 0.32(3.92)                   | 0.1(2.75)                    | -1.84(3.44)                                |
| <b>Qualitative case studies</b> |                                                                       |                                                                                              |                                                                |                                    |                                                                                                         |                                        |                              |                              |                                            |
|                                 | baseline(change) %                                                    | baseline (change)                                                                            |                                                                |                                    | baseline (change)                                                                                       |                                        |                              |                              |                                            |
| <b>High adherence at end</b>    |                                                                       |                                                                                              |                                                                |                                    |                                                                                                         |                                        |                              |                              |                                            |
| R01/39                          | 85(14)                                                                | 7(0)                                                                                         | 0.5                                                            | -0.4                               | 7(0)                                                                                                    | -5.9                                   | -2                           | 2                            | -4                                         |
| R02/07                          | 100(-2)                                                               | 7(0)                                                                                         | 0.2                                                            | -0.2                               | 7(0)                                                                                                    | 0                                      | 1                            | -5                           | -3                                         |
| R01/40                          | 92(8)                                                                 | 7(0)                                                                                         | 0.6                                                            | -0.2                               | 5(1)                                                                                                    | 7.2                                    | -9                           | 0                            | 1                                          |
| R02/52                          | 95(-25)                                                               | 7(0)                                                                                         | 0.3                                                            | -0.2                               | 7(0)                                                                                                    | 4.9                                    | 3                            | -1                           | 1                                          |

|                             |         |       |      |      |       |       |    |    |    |
|-----------------------------|---------|-------|------|------|-------|-------|----|----|----|
| R01/49                      | 100(0)  | 7(0)  | -0.8 | -0.7 | 7(0)  | 9.9   | -1 | 0  | -4 |
| <b>Low adherence at end</b> |         |       |      |      |       |       |    |    |    |
| R01/54                      | 60(-10) | 7(-1) | -0.3 | 0.4  | 6(0)  | -7.9  | 1  | -1 | 6  |
| R01/02                      | 55(16)  | 7(0)  | 0.8  | -0.2 | 2(3)  | 0     | -1 | -1 | -2 |
| R01/48                      | 0(100)  | 7(0)  | 0.9  | -0.8 | 6(0)  | 0     | 0  | 0  | -2 |
| R02/12                      | NA      | 7(0)  | -0.1 | -0.7 | 4(0)  | 14.6  | -3 | -2 | -5 |
| R02/03                      | 50(NA)  | 1(NA) | NA   | NA   | 2(NA) | NA    | NA | NA | NA |
| R01/44                      | 0(0)    | 7(0)  | 1.4  | 0.2  | 5(-4) | -16.6 | 0  | -1 | -5 |
| <b>Withdrawn</b>            |         |       |      |      |       |       |    |    |    |
| R01/42                      | 0(0)    | 5(-1) | -0.3 | -0.1 | 4(0)  | -5    | -1 | 5  | -6 |
| R02/02                      | 80(10)  | 7(0)  | 0.1  | -0.5 | 7(0)  | 9.2   | 2  | -1 | 1  |
| R02/42                      | 100(0)  | 7(0)  | 0.9  | 0    | 7(0)  | -12.1 | 1  | 7  | -1 |



Table g. Intermediate Outcomes

|                                                               | End of trial adherence<br>(day 150-180)♦ | Change in Objective<br>adherence♦ (%) | Change in<br>FEV1            | Number of<br>exacerbations in 6<br>months |
|---------------------------------------------------------------|------------------------------------------|---------------------------------------|------------------------------|-------------------------------------------|
| <b>Mean (SD)<sup>+</sup>/ Median (IQR)*</b><br>overall (n=33) | <u>34.7 ( 0.4 ,78. )*</u>                | <u>1.25( -5.8 , 36.3 )*</u>           | <u>0.1(0.51)<sup>+</sup></u> | <u>1( 0 , 2 )*</u>                        |
| <b>Qualitative case studies</b>                               |                                          |                                       |                              |                                           |
| <b>High adherence at end</b>                                  |                                          |                                       |                              |                                           |
| R01/39                                                        | 95.2                                     | 95.16                                 | -0.02                        | 1                                         |
| R02/07                                                        | 93.5                                     | -3.12                                 | NA                           | 0                                         |
| R01/40                                                        | 88.2                                     | 45.07                                 | 0.22                         | 0                                         |
| R02/52                                                        | 83.9                                     | -12.68                                | -0.13                        | 0                                         |
| <b>Medium adherence at end</b>                                |                                          |                                       |                              |                                           |
| R01/49                                                        | 68.3                                     | 55.06                                 | -0.12                        | 3                                         |
| <b>Low adherence at end</b>                                   |                                          |                                       |                              |                                           |
| R01/54                                                        | 29                                       | -15.8                                 | -0.03                        | 2                                         |
| R01/02                                                        | 29                                       | -1.14                                 | 0                            | 0                                         |
| R01/48                                                        | 5.2                                      | 3.34                                  | 1.07                         | 0                                         |
| R02/12                                                        | 0                                        | -10.23                                | -0.21                        | 0                                         |
| R02/03                                                        | 0                                        | -5.42                                 | NA                           | NA                                        |
| R01/44                                                        | 0                                        | -19.54                                | 0.9                          | 1                                         |
| <b>Withdrawn</b>                                              |                                          |                                       |                              |                                           |
| R01/42                                                        | NA                                       | NA                                    | 0                            | 0                                         |
| R02/02                                                        | NA                                       | NA                                    | -0.04                        | 3                                         |
| R02/42                                                        | NA                                       | NA                                    | 0.35                         | 1                                         |

♦ Normative numerator adjusted adherence

Additional File 04: Joint display table (data sources in **bold**)

| # | Logic model column / construct                                | Quantitative                                                                            | Qualitative                                                                                                                                                             | Convergence code |
|---|---------------------------------------------------------------|-----------------------------------------------------------------------------------------|-------------------------------------------------------------------------------------------------------------------------------------------------------------------------|------------------|
|   | <b>INPUTS</b>                                                 |                                                                                         |                                                                                                                                                                         |                  |
| 1 | MDT introduction to CFHealthHub                               | -                                                                                       | <b>Chief investigator reported:</b> introducing MDT to concept behind and application of CFHH.                                                                          | -                |
| 2 | CF Clinicians aware of the importance of monitoring adherence | -                                                                                       | <b>Chief investigator reported:</b> briefing collaborating MDTs. Reported change agents at centres internalised idea; some residual scepticism among senior physicians. | -                |
| 3 | Prescription data                                             | Study team found adherence levels of over 100% ( <b>Implementation log, 01 Dec 16</b> ) | Late identification of prescription changes found to be responsible. ( <b>Minutes, Trial Management Group Meeting 10 Jan 17</b> )                                       | Expansion        |
| 4 | Chipped nebuliser                                             | -                                                                                       | Devices ordered centrally by CTRU were delivered to sites on 20th May 2016 and processed for distribution on 23rd June 2016. ( <b>Project manager emails</b> )          | -                |
| 5 | Qualcom-Hub (docking & upload)                                | -                                                                                       | Devices ordered centrally by CTRU were delivered to sites on 20th May 2016 and processed for distribution on 23rd June 2016 ( <b>Project manager emails</b> )           | -                |
| 6 | CFHealthHub website/app                                       | -                                                                                       | Available, but under development through trial ( <b>Additional File 01</b> )                                                                                            | -                |
| 7 | COM-BMQ questionnaire                                         | COM-BMQ questionnaire data was collected at baseline for all consenting participants    | -                                                                                                                                                                       | -                |

|    |                                    |                                                                                                                                                                                                                                                                                                                |                                                                                                                                                                                                                                                                                                                                                                                                                                                                                                                     |           |
|----|------------------------------------|----------------------------------------------------------------------------------------------------------------------------------------------------------------------------------------------------------------------------------------------------------------------------------------------------------------|---------------------------------------------------------------------------------------------------------------------------------------------------------------------------------------------------------------------------------------------------------------------------------------------------------------------------------------------------------------------------------------------------------------------------------------------------------------------------------------------------------------------|-----------|
|    | responses                          | (Additional File 04 - Table 8)                                                                                                                                                                                                                                                                                 |                                                                                                                                                                                                                                                                                                                                                                                                                                                                                                                     |           |
| 8  | Intervention manual                | -                                                                                                                                                                                                                                                                                                              | High levels of interventionist satisfaction with manual. R01 Interventionist 1 remarked that, "all the stuff in the manuals was really good."                                                                                                                                                                                                                                                                                                                                                                       | -         |
| 9  | Interventionist training programme | <b>Structured questionnaire on interventionist confidence after training programme:</b><br>Interventionists (n=5) all averaged >8 for confidence across 11 questions. Isolated scores of <8 occurred three times: viewing charts/tables, completing report forms and understanding online training/assessment. | <b>In interviews</b> , interventionists reported high levels of satisfaction; one requested for more integration of research and intervention procedures. R01 Interventionist 1 remarked "You had the manual but I was missing bits". She wanted more case studies and mock patients in the training to compensate for this. An interventionist (R01 MDT member 1), who was a social worker by background, found the training very good, indicating that it the training had acceptability beyond physiotherapists. | Expansion |
| 10 | Interventionist support            | -                                                                                                                                                                                                                                                                                                              | <b>Research team member (MH) reported</b> giving mentorship and that one site/trust received more support from the PI than the other. The main interventionist at the other site received support from the part-time interventionist who was a member of the multi-disciplinary team.                                                                                                                                                                                                                               | -         |
| 11 | Competency/Fidelity assessment     | <b>Structured instrument for the assessment of interventionist competence:</b> Digital recordings were made and assessed for fidelity by MA, MH and JB. Fidelity assessment instrument modified after discussion, in advance of use on full-scale RCT.                                                         | -                                                                                                                                                                                                                                                                                                                                                                                                                                                                                                                   | -         |

|                   |                                                       |                                                                                                                                                                                                                                                                                                                                                                                                                                                   |                                                                                                                                                                                                                                                                                                                                                                     |              |
|-------------------|-------------------------------------------------------|---------------------------------------------------------------------------------------------------------------------------------------------------------------------------------------------------------------------------------------------------------------------------------------------------------------------------------------------------------------------------------------------------------------------------------------------------|---------------------------------------------------------------------------------------------------------------------------------------------------------------------------------------------------------------------------------------------------------------------------------------------------------------------------------------------------------------------|--------------|
| 12                | Motivated and effective interventionists              | -                                                                                                                                                                                                                                                                                                                                                                                                                                                 | <b>In interviews</b> , interventionists reported that they were enthusiastic about the intervention                                                                                                                                                                                                                                                                 | -            |
| <b>ENGAGEMENT</b> |                                                       |                                                                                                                                                                                                                                                                                                                                                                                                                                                   |                                                                                                                                                                                                                                                                                                                                                                     |              |
| 13                | Clinicians accessing adherence data*                  | Clinicians did not access CFHH. ( <b>CFHH Click analytics</b> )                                                                                                                                                                                                                                                                                                                                                                                   | <b>In interviews</b> , interventionists talked about run charts occasionally being viewed when brought to MDT meetings by interventionists.                                                                                                                                                                                                                         | Confirmation |
| 14                | Adherence data tracking                               | <b>CFHH click analytics</b> showed interventionists accessing data before meetings                                                                                                                                                                                                                                                                                                                                                                | This was confirmed <b>in interviews</b> .                                                                                                                                                                                                                                                                                                                           | Confirmation |
| 15                | Participant accessing CFHealthHub                     | <b>Click analytics:</b> The median number of sessions over 5 (+/- 1) months was 3 (interquartile range 1 to 8, range 1-44, <b>Additional File 05 - Table c</b> ), with a mean duration of 36.1 (SD=23.9) minutes. The mean total duration of interaction time across the study was 49.3 (SD 44.8) minutes. The mean length of an interaction was 12.4 (SD=9.6) minutes. The median number of days in the trial with interactions was 2 (IQR=1,7). | Lack of usability was explained <b>in interviews</b> by initially difficult login procedures and the lack of a mobile app for most of the pilot trial, leading participants to access an unsatisfactory desktop version on their mobile.                                                                                                                            | Expansion    |
| 16                | Push notifications/reminders each week*               | -                                                                                                                                                                                                                                                                                                                                                                                                                                                 | <b>Programmer reported that</b> automated push notifications not available during pilot trial. <b>In interviews</b> , one participant and one interventionist, reported the spontaneous development of informal push notifications in which the interventionist was ringing up and praising the participant for accomplishments, thereby building the relationship. | -            |
| 17                | CFHealthHub Intervention sessions delivered according | <b>Collected via project-specific structured fidelity assessment instrument (#11)</b> . After discussion                                                                                                                                                                                                                                                                                                                                          | <b>Fidelity observations indicated:</b> limited discussion of motivations; communication style                                                                                                                                                                                                                                                                      | Expansion    |

|    |                                                       |                                                                                                                                                                                                                                                                                                                                                                                                                                                            |                                                                                                                                                                                                                                                                                      |           |
|----|-------------------------------------------------------|------------------------------------------------------------------------------------------------------------------------------------------------------------------------------------------------------------------------------------------------------------------------------------------------------------------------------------------------------------------------------------------------------------------------------------------------------------|--------------------------------------------------------------------------------------------------------------------------------------------------------------------------------------------------------------------------------------------------------------------------------------|-----------|
|    | to Manual (Fidelity)                                  | between MA, MH and JB summary scores were agreed for delivery of content 100% and quality of delivery: 60-92%. Co-author Judy Bradley is intending to publish this work elsewhere.                                                                                                                                                                                                                                                                         | sometimes paternalistic rather than autonomy-enabling; insufficient attention to most active ingredients.                                                                                                                                                                            |           |
| 18 | Initial session, and then review at each clinic visit | <b>Collected via click analytics.</b> Patient run charts reveal a disparity in when and whether these happened ( <b>Additional File 07</b> ).                                                                                                                                                                                                                                                                                                              | -                                                                                                                                                                                                                                                                                    | -         |
|    | <b>ACTIVITIES</b>                                     |                                                                                                                                                                                                                                                                                                                                                                                                                                                            |                                                                                                                                                                                                                                                                                      |           |
| 19 | Clinicians monitor adherence                          | -                                                                                                                                                                                                                                                                                                                                                                                                                                                          | Clinician access to adherence data was sporadic (see #13) and <b>staff interviews confirmed</b> that it was not monitored. <b>In an interview</b> , participant R01/02 described the research intervention as “parallel rather than integrated” with mainstream clinical management. | -         |
|    | <i>Intervention components for all participants</i>   |                                                                                                                                                                                                                                                                                                                                                                                                                                                            |                                                                                                                                                                                                                                                                                      |           |
| 20 | Self-monitoring adherence                             | <b>Click analytics:</b> 'How am I doing?' pages were the most frequently visited in terms of the total number of clicks during the trial. 30 (90.9%) participants clicked a median of 11 (range 5-30) times in 5 months, but sometimes in a single session ( <b>Additional File 05 – Table d</b> ). Access did not always result in good alignment between subjective and objective adherence ( <b>Additional File 05 – Tables f and g respectively</b> ). | <b>In interviews</b> , moderate and frequent users said they mostly valued this page for self-monitoring.                                                                                                                                                                            | Expansion |
| 21 | Tailored education about treatment                    | <b>Click analytics:</b> Toolkit clicked a median 3 (range 0-7) times ( <b>Additional File 05 – Table d</b> ).                                                                                                                                                                                                                                                                                                                                              | <b>In participant interviews</b> , the DNASE video was popular. Other pages were accessed                                                                                                                                                                                            | Expansion |

|    |                                                                   |                                                                                                                                                                                      |                                                                                                                                                                                                                                                     |           |
|----|-------------------------------------------------------------------|--------------------------------------------------------------------------------------------------------------------------------------------------------------------------------------|-----------------------------------------------------------------------------------------------------------------------------------------------------------------------------------------------------------------------------------------------------|-----------|
|    |                                                                   |                                                                                                                                                                                      | infrequently or when issues arose, when the information was viewed as “more down to earth” (R02/07) than technical manuals.                                                                                                                         |           |
| 22 | Tailored patient stories (videos)                                 | <b>Click analytics:</b> ‘Talking heads’ videos accessed a median 2 (range 1-3) times ( <b>Additional File 05 – Table d</b> ).                                                        | <b>In participant interviews</b> , these videos divided opinion. Some participants liked to know that they were not alone; others did not want to see videos of others with CF.                                                                     | Expansion |
|    | <i>Intervention components for those with adequate motivation</i> |                                                                                                                                                                                      |                                                                                                                                                                                                                                                     |           |
| 23 | Personalised goal-setting                                         | <b>Click analytics:</b> Participants set target adherence levels in CFHH ( <b>Additional File 05 – Table 3</b> ).                                                                    | <b>In interviews</b> , participants reported goal-setting, but it was not clear how much it came from patients and how much from interventionists.                                                                                                  | Expansion |
| 24 | Goal review                                                       | <b>Click analytics:</b> Mean (SD) review sessions 1 (0.5) ( <b>Additional File 05 – Table e</b> ).                                                                                   | -                                                                                                                                                                                                                                                   | -         |
| 25 | Personalised action plan                                          | <b>Click analytics:</b> Action plan pages clicked on median 2 (inter-quartile range 1-7) times ( <b>Additional File 05 – Table e</b> ).                                              | Disliked by some participants who, the interventionist from centre R01 <b>reported during an interview</b> , found writing down action plans like “being at school”                                                                                 | Expansion |
| 26 | Tailored problem-solving                                          | <b>Click analytics:</b> Problem solving and coping plan pages clicked on median 3 (inter-quartile range 0-8) and 1 (0-3) times respectively ( <b>Additional File 05 – Table e</b> ). | <b>In interviews</b> , one participant realised that when she goes to her friend’s house, rather than missing a treatment she could do it in the car or anywhere. One interventionist from centre R02 thought it important that the information was | Expansion |

1  
2  
3  
4  
5  
6  
7  
8  
9  
10  
11  
12  
13  
14  
15  
16  
17  
18  
19  
20  
21  
22  
23  
24  
25  
26  
27  
28  
29  
30  
31  
32  
33  
34  
35  
36  
37  
38  
39  
40  
41  
42  
43  
44  
45  
46

|    |                                                     |                                                                                                                                                                                                                                                                                                                                                                                      |                                                                                                                                                                                                                                                                                                      |           |
|----|-----------------------------------------------------|--------------------------------------------------------------------------------------------------------------------------------------------------------------------------------------------------------------------------------------------------------------------------------------------------------------------------------------------------------------------------------------|------------------------------------------------------------------------------------------------------------------------------------------------------------------------------------------------------------------------------------------------------------------------------------------------------|-----------|
|    |                                                     |                                                                                                                                                                                                                                                                                                                                                                                      | “there if you need it” for patients.                                                                                                                                                                                                                                                                 |           |
|    | <b>IMMEDIATE OUTCOMES</b>                           |                                                                                                                                                                                                                                                                                                                                                                                      |                                                                                                                                                                                                                                                                                                      |           |
| 27 | Medical care informed by adherence                  | -                                                                                                                                                                                                                                                                                                                                                                                    | <b>Interviews</b> with PIs found that the trial and intervention ran alongside usual care rather than being informed by it (see also #13, #19).                                                                                                                                                      | -         |
|    | <i>For all participants</i>                         |                                                                                                                                                                                                                                                                                                                                                                                      |                                                                                                                                                                                                                                                                                                      |           |
| 28 | Acute awareness of adherence / increased Motivation | Answers to the <b>subjective adherence question (Additional File 05 – Table f)</b> were well aligned with <b>run charts (Additional File 07)</b> in those with high adherence. Alignment was more variable in those with moderate and poor adherence.                                                                                                                                | <b>In interviews</b> , some with high adherence used the CFHH “How am I doing page” (run charts) as a check (R02/07, R01/40); other high adherers did not (R01/49). Some felt that it increased their adherence, acknowledging that monitoring meant that they had, “...better make an effort here”. | Expansion |
| 29 | Increased necessity and decreased concern           | No change in the group averages for the <b>COM-BMQ</b> (incorporating Beliefs about Medicines Questionnaire - specific (Nebuliser adherence) 21-item validated self-report tool[1]) or Patient Activation Measure ( <b>PAM-13</b> ) (Health Style Assessment) assessment of patient knowledge, skill, and confidence for self-management[2]. ( <b>Additional File 05 – Table f</b> ) | -                                                                                                                                                                                                                                                                                                    | -         |
| 30 | Increased self-efficacy / Motivation                | No change in the group averages for a single question about confidence to adhere or the PAM-13. ( <b>Additional File 05 – Table f</b> )                                                                                                                                                                                                                                              | -                                                                                                                                                                                                                                                                                                    | -         |
|    | <i>For those with adequate</i>                      |                                                                                                                                                                                                                                                                                                                                                                                      |                                                                                                                                                                                                                                                                                                      |           |

|    |                                        |                                                                                                                                                                                                                                                                                                                    |                                                                                                                                                                                                                                                                                                                                               |           |
|----|----------------------------------------|--------------------------------------------------------------------------------------------------------------------------------------------------------------------------------------------------------------------------------------------------------------------------------------------------------------------|-----------------------------------------------------------------------------------------------------------------------------------------------------------------------------------------------------------------------------------------------------------------------------------------------------------------------------------------------|-----------|
|    | <i>motivation</i>                      |                                                                                                                                                                                                                                                                                                                    |                                                                                                                                                                                                                                                                                                                                               |           |
| 31 | Increased self-efficacy/<br>Motivation | No change in the group averages for a single question about confidence to adhere or the <b>PAM-13. (Additional File 05 – Table f)</b>                                                                                                                                                                              | -                                                                                                                                                                                                                                                                                                                                             | -         |
| 32 | Increased habit / Reduced<br>CHAOS     | No change in the group averages for <b>Self-Report Behavioural Automaticity Index (SRBAI)</b> automaticity-specific subscale of the Self Report Habit index to capture habit-based behaviour patterns[3] or in the assessment of routine measure of <b>life chaos</b> [4]. ( <b>Additional File 05 – Table f</b> ) | -                                                                                                                                                                                                                                                                                                                                             | -         |
| 33 | Reduced barriers                       | No change in the group averages for The Beliefs about Medicines Questionnaire - specific (Nebuliser adherence) ( <b>BMQ 21-item</b> ) ( <b>Additional File 05 – Table f</b> )                                                                                                                                      | The tailored problem-solving modules (#26) were not widely used but, <b>in interviews</b> , party plans and nebuliser guides were cited as having removed barriers by those who did use this content. For instance, one participant was able to find the technical name for a part of a nebuliser for which he needed to order a replacement. | Expansion |
|    | <b>INTERMEDIATE OUTCOMES</b>           |                                                                                                                                                                                                                                                                                                                    |                                                                                                                                                                                                                                                                                                                                               |           |
| 34 | Treatment optimisation                 | -                                                                                                                                                                                                                                                                                                                  | <b>Interview data</b> revealed patients to be behaving in unexpected ways, for instance taking holidays from their treatment or not taking medication as prescribed.                                                                                                                                                                          | -         |
| 35 | Increased adherence                    | <b>Nebuliser data via CFHH:</b> Mean adherence across all participants was 10 (95% CI: -5.2 to 25.2) percent higher in the intervention than in the                                                                                                                                                                | -                                                                                                                                                                                                                                                                                                                                             | -         |



1  
2  
3  
4  
5  
6  
7  
8  
9  
10  
11  
12  
13  
14  
15  
16  
17  
18  
19  
20  
21  
22  
23  
24  
25  
26  
27  
28  
29  
30  
31  
32  
33  
34  
35  
36  
37  
38  
39  
40  
41  
42  
43  
44  
45  
46

|  |  |                                                                                                                                                                                                                                                                                                                                                                                                                                                                                                                       |  |  |
|--|--|-----------------------------------------------------------------------------------------------------------------------------------------------------------------------------------------------------------------------------------------------------------------------------------------------------------------------------------------------------------------------------------------------------------------------------------------------------------------------------------------------------------------------|--|--|
|  |  | control arm. Within the case study participants (all intervention), an increase of 7.5% (95% CI: -8.2-23.1) in simple normative adherence with numerator adjustment can be observed in the intervention arm. Following month 1, adherence is consistently higher in the intervention arm with the greatest difference observed in month 5 (mean difference: 10.8, 95% CI: -11.44, 22.9). These differences would indicate a potentially clinically important difference between the intervention and usual care arms. |  |  |
|--|--|-----------------------------------------------------------------------------------------------------------------------------------------------------------------------------------------------------------------------------------------------------------------------------------------------------------------------------------------------------------------------------------------------------------------------------------------------------------------------------------------------------------------------|--|--|

[1] R. Horne, J. Weinman, M. Hankins, The beliefs about medicines questionnaire: The development and evaluation of a new method for assessing the cognitive representation of medication, *Psychol. Health.* 14 (1999) 1–24. doi:10.1080/08870449908407311.

[2] J.H. Hibbard, E.R. Mahoney, J. Stockard, M. Tusler, Development and testing of a short form of the patient activation measure., *Health Serv. Res.* 40 (2005) 1918–30. doi:10.1111/j.1475-6773.2005.00438.x.

[3] B. Verplanken, S. Orbell, Reflections on Past Behavior: A Self-Report Index of Habit Strength1, *J. Appl. Soc. Psychol.* 33 (2003) 1313–1330. doi:10.1111/j.1559-1816.2003.tb01951.x.

[4] M.D. Wong, C. a. Sarkisian, C. Davis, J. Kinsler, W.E. Cunningham, The Association Between Life Chaos, Health Care Use, and Health Status Among HIV-Infected Persons, *J. Gen. Intern. Med.* 22 (2007) 1286–1291. doi:10.1007/s11606-007-0265-6.

### Additional File 05 - Case-ordered descriptive matrix for fourteen case studies

*Qualitative findings in italics.* Otherwise, motivation, confidence, necessities, concerns, life chaos and subjective adherence (baselines and process outcomes) from self-report instruments (see Methods and Additional File 04). Engagement, activities and data captured by CFHealthHub.

| Case / baselines / context                                                                                                                                                                               | Engagement                                                                                                                                                                                   | Activities                                                                                                                                                                                              | Process outcomes                                                                                                            | Intermediate outcomes                                                              |
|----------------------------------------------------------------------------------------------------------------------------------------------------------------------------------------------------------|----------------------------------------------------------------------------------------------------------------------------------------------------------------------------------------------|---------------------------------------------------------------------------------------------------------------------------------------------------------------------------------------------------------|-----------------------------------------------------------------------------------------------------------------------------|------------------------------------------------------------------------------------|
| <b>High adherence (average &gt;80%) in last month of trial</b>                                                                                                                                           |                                                                                                                                                                                              |                                                                                                                                                                                                         |                                                                                                                             |                                                                                    |
| <b>R01/39.</b> High motivation, confidence and necessities, medium concerns, quite high chaos. <i>They got a lot of information about CF from other websites.</i>                                        | Used CFHH once. <i>Very engaged with interventionist and trial.</i>                                                                                                                          | <i>Didn't make plans – felt it was her responsibility to adapt her life; found others monitoring helpful. Didn't like videos or social aspects of website because of the reminder of her mortality.</i> | <i>Knowledge that clinicians could access treatment adherence information provided extra motivation to adhere.</i>          | End of trial adherence 95% (95% improvement).                                      |
| <b>R02/07.</b> High motivation, and confidence, medium-high necessity, medium concerns and chaos. Existing high adherer, <i>sees treatment as a “plan for longevity” rather than a “chore”.</i>          | Used CFHH twice. <i>Didn't find it useful or like the videos (doesn't want to see negative side of CF).</i>                                                                                  | Made action plan, accessed some modules once. <i>Found goal-setting with interventionist helpful.</i>                                                                                                   | Little change as already, motivated. Reduced CHAOS and barriers.                                                            | End of trial adherence 93% (3% decline).                                           |
| <b>R01/40.</b> High motivation, medium confidence and necessities, low concerns, medium-to-low chaos. <i>Was recruited soon after exacerbation.</i>                                                      | Had nine CFHH sessions. <i>“I've been logging on to track my progress... every two weeks to a month”. Finds others monitoring him helpful.</i>                                               | Frequent self-monitoring. <i>Compensates for slippages by planning to do the rest of his doses.</i>                                                                                                     | Motivation already high, but habit lacking. <i>Intervention has made him think about adherence more than he did before.</i> | End of trial adherence 88% (45% improvement). Variance over trial, but trajectory. |
| <b>R02/52.</b> High motivation, confidence and necessity, low concerns, low-medium chaos. Existing good adherer; <i>wanted something like a fitness tracker with feedback - messages on performance.</i> | 13 CFHH sessions. <i>Liked the more portable nebuliser, could take it away on work. CFHH session that precedes interventionist visit explained by interventionist testing login details.</i> | Frequent self-monitoring, regular use of tailored education and problem solving (fixing nebuliser problems) and some use of videos. <i>Wanted it expanding to physical activity.</i>                    | Motivation already high. Increased habit.                                                                                   | End of trial adherence 83% (12% decline).                                          |

| Case / baselines / context                                                                                                                                                                                                                               | Engagement                                                                                                                                                                                                                                                   | Activities                                                                                                                | Process outcomes                                    | Intermediate outcomes                                                                                                                                                   |
|----------------------------------------------------------------------------------------------------------------------------------------------------------------------------------------------------------------------------------------------------------|--------------------------------------------------------------------------------------------------------------------------------------------------------------------------------------------------------------------------------------------------------------|---------------------------------------------------------------------------------------------------------------------------|-----------------------------------------------------|-------------------------------------------------------------------------------------------------------------------------------------------------------------------------|
| <b>Moderate adherence (average 50-80%) in last month of trial</b>                                                                                                                                                                                        |                                                                                                                                                                                                                                                              |                                                                                                                           |                                                     |                                                                                                                                                                         |
| <b>R01/49.</b> High motivation, confidence, medium-high necessity and concerns low chaos. <i>Participated to 'prove' themselves to their physiotherapist; poor awareness of own adherence not improved over course of trial.</i>                         | 4 CFHH sessions                                                                                                                                                                                                                                              | Used problem-solving modules and self-monitoring, but no action plan.                                                     | Increased motivation, reduced barriers.             | End of trial adherence 68% (55% improvement). An important improvement from low adherence, but subjective adherence still poorly 'calibrated' with objective adherence. |
| <b>Poor adherence (&gt;50%) in last month of trial</b>                                                                                                                                                                                                   |                                                                                                                                                                                                                                                              |                                                                                                                           |                                                     |                                                                                                                                                                         |
| <b>R01/54.</b> Professed high motivation and confidence, medium necessity, low concerns, medium to low chaos. <i>Wants the doctor "to notice" that they are adherent to their treatment, demotivated by the fact they don't.</i>                         | 44 CFHH sessions. <i>Appreciative of extrinsic motivation from face-to-face contact with interventionist.</i>                                                                                                                                                | Frequent self-monitoring; initially high use of action plans and problem solving. <i>Dislikes 'talking heads' videos.</i> | More barriers by the end of the trial.              | End of trial adherence 29% (16% decline), but run chart shows huge variance week by week.                                                                               |
| <b>R01/02.</b> High motivation, low confidence, medium necessity and concerns, high chaos. <i>Dissatisfaction at service reconfiguration: moved across from Poole to Southampton during trial. Upset that wider team isn't noticing their adherence.</i> | Used CFHH once <i>but had technical problems.</i> <i>Appreciative of interventionist: "Having a personal contact and someone to guide you through it is really useful"</i> <i>Wider team not talking about adherence: "parallel rather than integrated".</i> | Two review sessions with interventionist.                                                                                 | Reduced CHAOS and barriers; increased self-efficacy | Lack of pre-post change not contradicted by the run chart which shows improvement.                                                                                      |

| Case / baselines / context                                                                                                                                                                                                                                                                                             | Engagement                                                                                                        | Activities                                                                                                                                                   | Process outcomes                                              | Intermediate outcomes                                                                                                                                                                                   |
|------------------------------------------------------------------------------------------------------------------------------------------------------------------------------------------------------------------------------------------------------------------------------------------------------------------------|-------------------------------------------------------------------------------------------------------------------|--------------------------------------------------------------------------------------------------------------------------------------------------------------|---------------------------------------------------------------|---------------------------------------------------------------------------------------------------------------------------------------------------------------------------------------------------------|
| <p><b>R01/48.</b> professed high motivation and confidence, medium-high necessities and concerns; medium chaos. <i>This 69-year old doesn't like nebulising; "can't teach an old dog new tricks". No belief in benefit of nebulised medication. Poor awareness of own adherence. Altruistic trial participant.</i></p> | <p>Used CFHH three times. <i>Access problems (passwords, etc) - gave up.</i></p>                                  | <p>Some engagement with toolkit, action plans and problem-solving, <i>didn't like the videos.</i> Engagement drops off as soon as the last meeting over.</p> | <p>No change in process outcomes.</p>                         | <p>End of trial adherence 5% (3% improvement). <i>Said was making an effort for the trial.</i> In line with this, objective adherence was high (~80%) for weeks 6-21</p>                                |
| <p><b>R02/12.</b> High motivation, medium to low confidence, medium to high necessity and concerns, medium chaos.</p>                                                                                                                                                                                                  | <p>Started off engaged, lots of CFHH use and two intervention sessions in first 100 days, nothing thereafter.</p> | <p>Made plans, liked website, checked graphs. <i>Liked face-to-face interaction with interventionist.</i></p>                                                | <p>Decreased chaos and barriers but also decreased habit.</p> | <p>Initial improvement in adherence (up to 100% between weeks seven and nine after first intervention not sustained over time. Review stimulates brief improvement at week 15, again not sustained.</p> |

| Case / baselines / context                                                                                                                                                                                                                                                                                                                         | Engagement                                                                                                                                                                                     | Activities                                                                                                                                                                                                              | Process outcomes                       | Intermediate outcomes                                       |
|----------------------------------------------------------------------------------------------------------------------------------------------------------------------------------------------------------------------------------------------------------------------------------------------------------------------------------------------------|------------------------------------------------------------------------------------------------------------------------------------------------------------------------------------------------|-------------------------------------------------------------------------------------------------------------------------------------------------------------------------------------------------------------------------|----------------------------------------|-------------------------------------------------------------|
| <p><b>R02/03.</b> Low motivation and confidence, medium necessities, concerns and chaos. <i>Treatment is something that he has to do but doesn't want to do it, or think about CF. Forgets about treatment because of busy lifestyle. Prioritises other things above health. Knows that this doesn't end well, but no readiness to change.</i></p> | <p>Minimal short-term engagement with CFHH. <i>Interventionist notes that participant has always been difficult to get hold of.</i></p>                                                        | <p>Made action and coping plans, checked graphs.</p>                                                                                                                                                                    | <p>No process data at follow-up.</p>   | <p>Withdrew from treatment early.</p>                       |
| <p><b>R01/44.</b> High motivation, medium confidence, necessities, low concerns, high chaos (<i>"I can't seem to get into a routine"</i>). Recruited during exacerbation: baseline artificially high. Intervention 1 visit didn't happen until Week 17. <i>Participant describes self as "uncompliant" except around inpatient stays.</i></p>      | <p>One CFHH session (at intervention visit 1). Interventionist appears not to have done correct preparation. Only participant rated by an interventionist as having inadequate motivation.</p> | <p><i>Participant confirms that he made action plan, coping plan and checked graphs with interventionist but chaotic lifestyle and low motivation prevented further use. Admits only has a routine in hospital.</i></p> | <p>No change in process variables.</p> | <p>Initial spikes of adherence not sustained over time.</p> |

| Withdrawn                                                                                                                                                                                                                                                                   |                                                                                                                                                  |                                                                                                                           |                                     |                                                                                                                                                                                    |
|-----------------------------------------------------------------------------------------------------------------------------------------------------------------------------------------------------------------------------------------------------------------------------|--------------------------------------------------------------------------------------------------------------------------------------------------|---------------------------------------------------------------------------------------------------------------------------|-------------------------------------|------------------------------------------------------------------------------------------------------------------------------------------------------------------------------------|
| Case / baselines / context                                                                                                                                                                                                                                                  | Engagement                                                                                                                                       | Activities                                                                                                                | Process outcomes                    | Intermediate outcomes                                                                                                                                                              |
| <b>R01/42.</b> Medium motivation, low confidence, medium-high necessity, medium concerns, low chaos. <i>Originally an i-neb user. Does not think nebulising three times a day is achievable. Moved house during study. No broadband – so didn't do nebulisations.</i>       | <i>Loved the website and shared it. 41 CFHH sessions. Intervention visit 1 reported to be chaotic.</i>                                           | Made action plan.                                                                                                         | Little change in process variables. | Interview might have triggered brief increase in nebuliser use, when <i>participant realised nebulisations were being logged even when he wasn't plugging it in.</i>               |
| <b>R02/02.</b> High motivation and confidence, medium-high necessity low concerns and chaos. <i>Interview shows them to be motivated by interventionist visit and qualitative interview (Hawthorne effect). Subjective adherence poorly aligned to objective adherence.</i> | Limited engagement. Three CFHH Sessions all on the same day.                                                                                     | Made an action plan <i>but reported that she didn't set goals because she thought she her adherence was already good.</i> | Little change in process variables. | Adherence run chart starts off high, but drops off quickly. Interview might have triggered brief increase in nebuliser use. Withdrew from collection of nebuliser data collection. |
| <b>R02/42.</b> High motivation and confidence, medium to high necessity, low concerns, medium chaos                                                                                                                                                                         | Withdrew - <i>didn't like the eTrac nebuliser - delivering the drug too quickly made them cough. Interventionist encouraged discontinuation.</i> | <i>Didn't look at the website.</i>                                                                                        | No change in process outcomes       | Assumed no change in adherence, but objective lacking.                                                                                                                             |

## ACTiF Pilot Statistical Report

L Mandefield

### Methods

### Outcomes

#### Feasibility outcomes

The primary objective of this study was to determine the feasibility of proceeding to a definitive trial. An external pilot randomised controlled trial to determine feasibility of a randomised controlled trial based on objective stop-go criteria related to:

- (a) participant recruitment;
- (b) participant retention; and,
- (c) quality of primary outcome data at 5 (+/- 1) months post randomisation.

These were assessed by

- i. The number of screened, eligible and recruited participants per month, per centre and overall;
- ii. The number and percentage of participants who complete their 5(+/-1) month post randomisation follow up;
- iii. The number of Fuchs criteria by exacerbation.

#### Clinical outcomes

The primary clinical outcome measure was the number of pulmonary exacerbations in the 5 (+/-1) month post-baseline follow-up period, defined according to a modified version of the Fuchs criteria. The original Fuchs criteria was 4 out of 16 symptoms leading to IV antibiotic treatment. An exacerbation of respiratory symptoms will be said to have occurred when a participant was treated with parenteral antibiotics for any one of the following 12 signs or symptoms:

1. change in sputum;
2. new or increased hemoptysis;
3. increased cough;
4. increased dyspnea;
5. malaise, fatigue, or lethargy;
6. temperature above 38 °C;
7. anorexia or weight loss;

- 1
- 2
- 3 8. sinus pain or tenderness;
- 4
- 5 9. change in sinus discharge.
- 6
- 7 10. change in physical examination of the chest, derived from notes by site staff.
- 8
- 9 11. decrease in pulmonary function by 10 percent or more from a previously recorded value, derived
- 10 from notes by site staff; or,
- 11
- 12 12. radiographic changes indicative of pulmonary infection, derived from notes by site staff.

The trial interventionist or prescribing clinician/nurse will collect data on the "exacerbations" form at the point of a participant starting a course of IV antibiotics.

The following secondary outcomes were also collected at baseline and 5 (+/-1) month follow up:

- 18 1. Body Mass Index (BMI).
- 19 2. Forced expiratory volume in 1 second (FEV1): standardised spirometry as a measure of condition
- 20 severity.
- 21 3. EuroQol EQ-5D-5L: generic health status measure for health economic analysis.
- 22 4. The Patient Activation Measure (PAM-13): assessment of patient knowledge, skill, and confidence
- 23 for self-management.
- 24 5. Confusion, Hubbub, and Order Scale (CHAOS 6-item): measure of life chaos.
- 25 6. Medication Adherence Data-3 items (MAD-3)
- 26 7. Self-Report Behavioural Automaticity Index (SRBAI)
- 27 8. Cystic Fibrosis Questionnaire-Revised (CFQ-R): disease specific health-related quality of life
- 28 instrument.
- 29 9. The Patient Health Questionnaire depression scale (PHQ-8): severity measure for depressive
- 30 disorders.
- 31 10. The General Anxiety Disorder 7-item anxiety scale (GAD-7): severity measure for anxiety.
- 32 11. The Capability Opportunity Motivation Behaviour Beliefs Questionnaire (COM- BMQ): This
- 33 questionnaire incorporates:
- 34 a. The Beliefs about Medicines Questionnaire - specific (Nebuliser adherence) (BMQ 21-item): a
- 35 validated self-report tool, customised by the author to identify perceived necessities and concerns
- 36 for nebuliser treatment.
- 37 b. The following project-specific items: one additional belief item, one intention item, one confidence
- 38 item, and a list of barriers. These will serve as a tailoring tool for the intervention and also as a
- 39 secondary outcome measure. 12. Subjective adherence single question: self-report estimate of
- 40 adherence as a percentage. Self-reported problems: identification of capability and opportunity
- 41 barriers to nebuliser adherence
- 42 13. Concomitant medications: bespoke instrument, designed for this research project.
- 43 14. Resource use form: interventionist collects data from a combination of hospital notes and the NHS
- 44 patient electronic system to determine 1) inpatient IV days 2) Routine clinic visits 3) Unscheduled
- 45 outpatient contacts 3) unscheduled inpatient stays.
- 46 15. Prescription: a monthly prescription check to both check for data transfer to CFHealthHub and
- 47 review for an indication that the prescription has changed or indication of microorganism e.g.
- 48 16. Adherence to prescribed medication
- 49 17. Any treatment with IV antibiotics
- 50
- 51
- 52
- 53
- 54
- 55
- 56
- 57
- 58
- 59
- 60



## Sample Size

Sample size calculation was based on estimating parameters within a certain amount of precision rather than hypothesis testing. The sample size for a feasibility study should be adequate to estimate the uncertain critical parameters (standard deviations for continuous outcomes; consent rates, event rates, attrition rates for binary outcomes) needed to inform the design of the full RCT with sufficient precision.

To assess recruitment rate, the external pilot RCT ran in two CF units for 12 months, with four months recruitment, one months 'run-in' period (the period between the consent and baseline visit), and 5 (+/-1) months follow up. To match the proposed recruitment rate of the main RCT, the target sample over the four months for which the pilot RCT was open, was 32 per centre (64 in total from the two pilot centres). We aimed to see a minimum of 75% of the recruitment target to be confident of the trial viability i.e. at least 48 patients in total consented and randomized in four months' of recruitment from two centres.

## Randomisation

Randomisation was conducted using a computer generated pseudo-random list with random permuted blocks of varying sizes, created and hosted by the Sheffield CTRU in accordance with their Standard Operating Procedures (SOPs) and was held on a secure server. ACTiF participants will be randomised in a 1:1 ratio, intervention to control arms, stratified by:

- Site;
- Number of IV days in previous 12 months as collected at consent visit (two categories will be (i) less than or equal to 14 days and (ii) greater than 14 days).

Study researchers accessed the allocation for each participant by logging in to the remote, secure internet-based randomisation system. Once a participant had consented to the study, the researcher logged into the randomisation system and entered basic demographic information. After this information had been entered the allocation for that participant was then revealed to the researcher.

Block randomisation with randomly varying block size of 2, 4 and 6 was used so that the sequence of allocation could not be predicted. The block sizes were determined by the trial statistician and block size was not revealed to any other member of the study team.

## Blinding

The trial statisticians remained blind until data freeze, at which point unblinded data was presented to them so checks could be carried out.

## Statistical Methods

All statistical analyses were performed in R version 3.3.1.

## Analysis Populations

The ITT population includes all participants for whom consent was obtained and who were randomised to treatment, regardless of whether they received the intervention or not. This is the

1  
2  
3 primary analysis set and endpoints were summarised for the ITT population unless otherwise  
4 stated.  
5

### 6 **Participant Flow**

7  
8 A CONSORT flow diagram was used to display data completeness and patient flow from first  
9 contact to final follow up.  
10

11 The number of participants recruited at each centre each month was presented. The number of  
12 participants who withdrew consent from the trial, withdrew from the intervention, withdrew from  
13 collection of the primary outcome, withdrew consent from adherence data collection and who  
14 were lost to follow up were presented overall, by treatment arm and site. The reasons for  
15 attrition, where given, were presented.  
16

### 17 **Patient reported outcome measures (PROMS)**

18  
19 The following PROMS were completed at baseline and 5 (+/-1) month follow up visit. For  
20 detailed methods of how these questionnaires were scored, please see the appendix.  
21

### 22 **Data completeness**

23  
24 A CONSORT flow diagram was used to display data completeness and patient throughput from  
25 first contact to final follow up.  
26

### 27 **Baseline characteristics**

28  
29 Participants' demographics (age, sex, ethnicity, IMD decile), physical measurements (weight,  
30 height, BMI), clinical measurements (FEV1, IV days in last registry year, Pseudomonas status,  
31 Adherence in first 2 weeks, Subjective adherence, Medication, Treatment burden) patient  
32 reported outcomes (EQ-5D-5L, PAM-13, CHAOS, MAD-3, SRBAI, CFQ-R, GAD-7,  
33 COMBMQ, PHQ-8). Imbalance between treatment arms was not tested statistically but were  
34 reported descriptively.  
35  
36

### 37 **Primary effectiveness analysis of clinical outcomes**

38  
39 The primary endpoint of the study is the number of exacerbations in a 5 (+/- 1) month period.  
40 Exacerbations were defined as being treated with IV antibiotics and meeting at least 1 Fuchs  
41 criteria.  
42

43 The number of exacerbations by participant were presented. The number and percentage of  
44 exacerbations with each Fuchs criteria were presented. The length of IV course was summarised  
45 by intervention arm for all exacerbations and for participants experiencing exacerbations.  
46

47 The primary effectiveness analysis used a negative binomial model and included all  
48 exacerbations in a 6 month follow up period. Participants who were not followed for this length  
49 were excluded. An adjusted model included IV days in the previous 12 months as a covariate.  
50 Although not prespecified, a further sensitivity analysis was carried out. This model included the  
51 number of days followed up as an offset. This allowed all consenting participants to be included.  
52 An adjusted offset model included IV days in the previous 12 months as a covariate.  
53  
54  
55  
56  
57  
58  
59

## Secondary effectiveness analysis of clinical outcomes

### Patient reported outcome measures

Secondary outcomes were measured at baseline and 5 (+/-1) months post randomisation. The mean difference between treatment arms was calculated for each of the secondary outcomes, along with 95% confidence intervals using a multiple linear regression model. Adjustment for baseline and site was carried out and both unadjusted and adjusted results were presented.

### Adherence to medication

The time of inhalations of medication was recorded via chipped nebulisers. This data along with prescription data was used to calculate a number of different adherence measures. Adherence in people with CF is of key importance. For this reason, it was decided that 7 separate measures of adherence to prescribed medication were to be presented:

1. Total doses;
2. Unadjusted adherence;
3. Simple normative adherence (without numerator adjustment);
4. Sophisticated normative adherence (without numerator adjustment);
5. Simple normative adherence (with numerator adjustment);
6. Sophisticated normative adherence (with numerator adjustment);
7. Subjective single adherence.

Measures 1-6 are calculated daily based on the chipped nebuliser data and the dose prescribed that day. Means can be calculated for set periods, e.g. weekly.

The specific calculations of these adherence measured are described below.

#### Total doses taken

As a basic, unadjusted measure of adherence, the total number of doses taken for the time period will be calculated.

#### Unadjusted adherence

Adherence is typically calculated as the dose taken divided by the dose described per day.

#### Simple normative adherence (without numerator adjustment)

Quality of adherence reporting is dependent on the PWCF being prescribed the appropriate medications. Adjusting the denominator of the adherence calculation controls for treatment rationalisation to try reduce treatment burden, which is an approach often seen in people in CF. The simple normative adherence is calculated as follows:

1. If the participant does not have pseudomonas
  - Minimum denominator is set at 1 treatment/day.

2. If the participant has chronic pseudomonas
  - Minimum denominator is set at 3 treatments/day
3. The participant has chronic pseudomonas and intermittent inhaled antibiotic regimens
  - Minimum denominator is 3 treatments/day during 28 day 'on' period
  - Minimum denominator is 1 treatment/day during 28 day 'off' period
4. The participant has intermittent pseudomonas
  - Minimum denominator is 3 treatments/day for 1 or 3 months depending on the eradication regime
  - Minimum denominator is 1 treatment/day for the rest of the time

In calculating normative adherence an expected minimum prescription based on a patient's health state is needed. Most patients take a dose of a mucolytic, and patients meeting the criteria will take two doses of antibiotics. In adherence calculations, participants had their denominator amended to reflect their prescription. A complication arises in denominator adjustments when the antibiotic prescribed is one that is expected to be used in an alternating fashion (e.g. 28 days use, 28 days off). The antibiotic medications Aztreonam Lysine and Tobramycin are normally prescribed in this way; for patients with prescriptions for these medications with periods of more than 28 days without a prescription for an antibiotic, the denominator was adjusted to add in 2 doses / day. After 28 days of substituted antibiotic use, a 28 'day off' cycle was programmed. This cycle was continued until such time as another antibiotic prescription was present.

### **Sophisticated normative adherence (without numerator adjustment)**

The sophisticated normative adherence is calculated as follows:

1. If someone has 'mild genotype', is pancreatic sufficient and has FEV1 > 90%, without Pseudomonas and used  $\leq$  14 days intravenous antibiotics in the past 1 year.
  - There is no minimum target. Denominator is determined by the agreed prescription between clinicians and participants.
2. If someone is homozygous for class I-III CFTR mutation OR pancreatic insufficient OR FEV1  $\leq$  90%, but without Pseudomonas and used  $\leq$  14 days intravenous antibiotics in the past 1 year. Minimum denominator is set at 1 treatment/day.
3. If the person has chronic pseudomonas AND/OR
  - the person used > 14 days intravenous antibiotics in the previous year Minimum denominator is set at 3 treatments/day
4. If the person has chronic pseudomonas AND/OR used > 14 days intravenous antibiotics in the previous year but is on intermittent inhaled antibiotic regimens
  - Minimum denominator is 3 treatments/day during 28 day 'on' period
  - Minimum denominator is 1 treatment/day during 28 day 'off' period
5. If someone has intermittent pseudomonas but used  $\leq$  14 days intravenous antibiotics in the past 1 year

- Minimum denominator is 3 treatments/day for 1 or 3 months depending on the eradication regime
- Minimum denominator is 1 treatment/day (or 0, i.e. no minimum target) depending on their genotype, pancreatic status and FEV1 for the rest of the time.

### **Numerator adjustment in simple and sophisticated normative case**

Numerator adjustment occurs only if a daily adherence measure is greater than 100%, thus the maximum daily adherence is set at 100%.

### **Subjective single adherence**

All participants will be asked to estimate their adherence as a percentage at baseline, clinic visits, 5(+/-1) months and any further visits up to 30th April 2017. These subjective measures were presented separately. The question referred to the previous 2 weeks.

### **Adherence summaries**

The mean and SD was calculated for each month of the trial by treatment arm. Weekly numerator adjusted normative adherence was calculated and a mean by treatment arm was calculated and presented as a line graph for the first 25 weeks from randomisation.

### **Intervention adherence**

The intervention comprised of:

- (a) a chipped nebuliser to collect adherence data
- (b) access for participants and interventionist to the adherence data summaries
- (c) an online platform (CFHealthHub) offering summaries of adherence and tailored modules to be used by the health professional when interacting with the participant and independently by the participant.

A number of metrics were collected from CFHealthHub including the timing and date of clicks and the page/module that was clicked on. Interactions with CFHH were defined as a series of clicks with no greater than 15 minute gaps between clicks. Length of each session was calculated and days with interactions were calculated by participant.

The mean, standard deviation (SD), median and interquartile range (IQR) for the CFHH metrics were calculated and presented by participant. The same summary statistics were also presented for length of all sessions. The timing of CFHH interactions in days from randomisation was plotted by participant. The number of clicks per page category (Home, How am I doing?, Treatment etc) was plotted in a bar chart and also presented in a table by participant and by session.

Date and time of sessions with the interventionist were also recorded. The number of sessions with an interventionist and the length of sessions by participant were summarised in a table.

### **Clinic visits**

The number of clinic visits completed by each participant excluding consent and 5 month follow up was recorded. Summary statistics were presented by treatment arm to assess whether ascertainment bias occurred in the intervention arm.

### **Safety analysis**

The number of Adverse Events (AEs) and Serious Adverse Events (SAEs) was recorded and presented by treatment arm. These events were further categorised by the type of adverse event and whether they were related to the intervention.

### **Protocol non compliances**

The number and type of protocol non compliances were presented descriptively.

### **Summary of missing data**

The number of missing values or scores for each of the primary and secondary outcomes was presented by baseline and 5 (+/-1) months post randomisation and by treatment arm. Furthermore, the number and percentage of missing items was presented for each of these questionnaires.

## Results

### Participant Flow

Participants were recruited for 4 months across 2 sites. The CONSORT flow diagram (Fig.1) shows the flow of participants through the trial. 32 participants were randomised at each site. 33 participants were randomised to the intervention arm and 31 participants were randomised to usual care. A total of 59 participants completed the 5 (+/- 1) month follow up visit (Intervention = 31, Usual care = 28).

A total of 8 participants discontinued the trial before the follow up visit (Intervention = 4, Usual care = 4). Of these discontinuations, 5 no longer had their adherence data collected and the same 5 participants did not have their primary outcome collected. Of those who did not continue with primary outcome collection, 2 participants died, 1 withdrew consent and 2 were lost to follow up.

Following the 5 (+/-1) month visit, adherence data and primary outcome data was collected. 2 participants withdrew from adherence data collection during this time (Intervention =1, Usual care =1). 59 participants completed primary outcome data collection up to study completion on 30th April 2017 (Intervention = 31, Usual care =28).

1  
2  
3 **Recruitment by centre and month**  
4  
5  
6  
7  
8  
9  
10  
11  
12  
13  
14  
15  
16  
17  
18  
19  
20  
21  
22  
23  
24  
25  
26  
27  
28  
29  
30  
31  
32  
33  
34  
35  
36  
37  
38  
39  
40  
41  
42  
43  
44  
45  
46  
47  
48  
49  
50  
51  
52  
53  
54  
55  
56  
57  
58  
59  
60

For peer review only



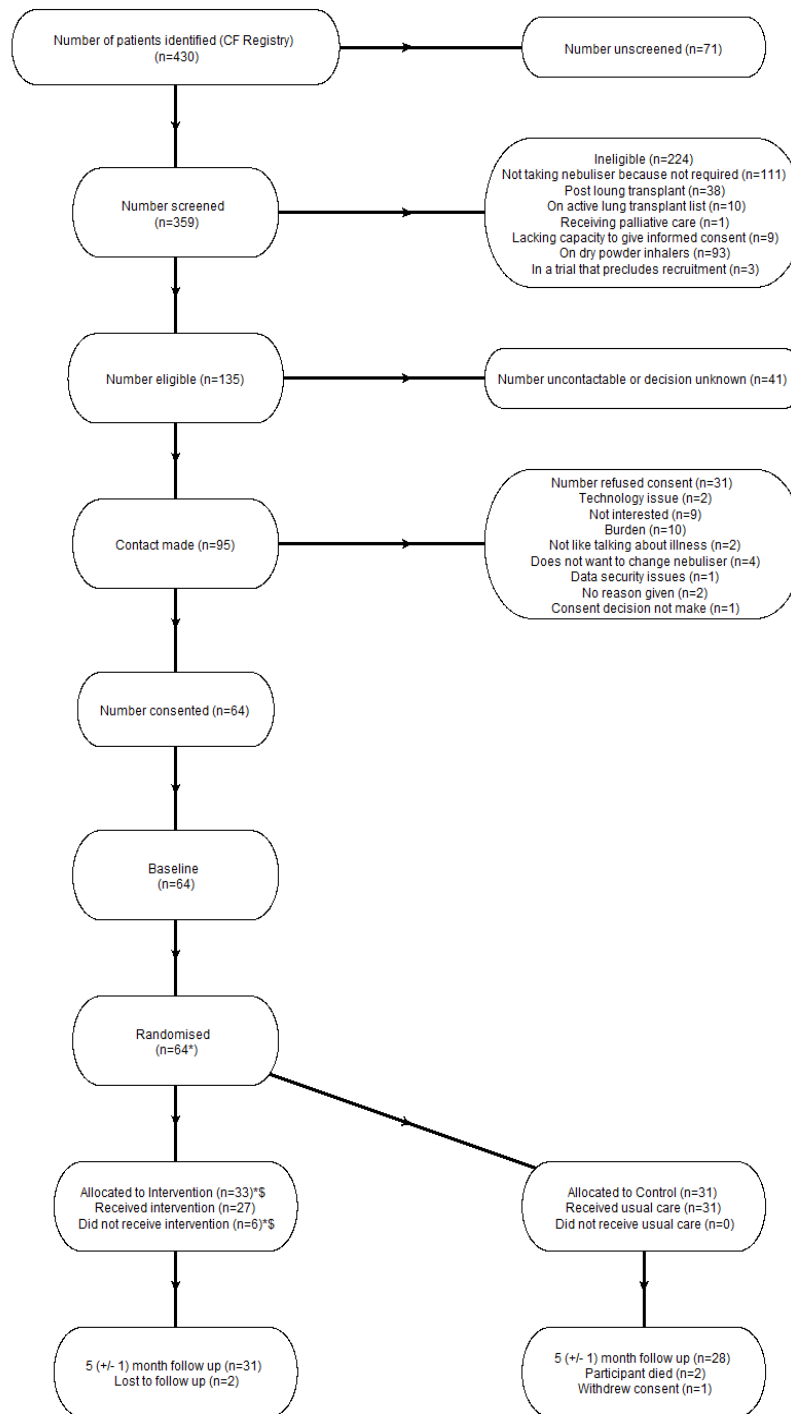

Figure 1: CONSORT flow diagram for ACtiF pilot study.

Table 1: Participants consented by centre and by month

|        | June 16 | July 16 | Aug 16 | Sept 15 | Total |
|--------|---------|---------|--------|---------|-------|
| Site A | 4       | 16      | 7      | 5       | 32    |
| Site B | 2       | 17      | 5      | 8       | 32    |

**Attrition by Centre and Treatment arm**

Table 2: Attrition presented by treatment arm and site.

|                          |              | n  | Withdrew<br>Consent (%) | Died<br>(%) | Lost to Follow<br>up (%) | Overall<br>(%) |
|--------------------------|--------------|----|-------------------------|-------------|--------------------------|----------------|
| <b>Overall</b>           |              | 64 | 1(17%)                  | 2(33%)      | 2(40%)                   | 5(7.8%)        |
| <b>Treatment<br/>arm</b> | Intervention | 33 | 0(0%)                   | 0(0%)       | 2(40%)                   | 2(6.1%)        |
|                          | Usual Care   | 31 | 1(20%)                  | 2(40%)      | 0(0%)                    | 3(9.7%)        |
| <b>Site</b>              | Site A       | 32 | 0(0%)                   | 1(20%)      | 1(20%)                   | 2(6.2%)        |
|                          | Site B       | 32 | 1(20%)                  | 1(20%)      | 1(20%)                   | 3(9.4%)        |

### Baseline characteristics

Table 4 shows the baseline characteristics of participants randomised by treatment arm. 33 participants were randomised to the intervention and 31 were randomised to usual care. The average age of participants was 29.7 (SD=11.5). Participants in the intervention arm were slightly older (median=28, IQR=(21,37)) than those in the usual care arm (median=26, IQR=(20,34)). Table 5 shows the CF measures presented by treatment arm. Tables 6-7 show the baseline questionnaire scores presented by treatment arm.

### Baseline demographics

Table 3: Baseline demographics by treatment arm

|                      | Intervention | Control      | Overall            |
|----------------------|--------------|--------------|--------------------|
| Age                  |              |              |                    |
| n                    | 33           | 31           | 64                 |
| Mean(SD)             | 31.6(13.3)   | 27.8(8.9)    | 29.7(11.5)         |
| Median(IQR)          | 28(21,37)    | 26(20,34)    | 27(21,36)          |
| Min,Max              | (16,69)      | (16,50)      | (16,69)            |
| Sex                  |              |              |                    |
| Male                 | 18(54.5%)    | 18(58.1%)    | 36(56.2%)          |
| Female               | 15(45.5%)    | 13(41.9%)    | 28(43.8%)          |
| Socioeconomic Status |              |              |                    |
| Most deprived        | 6(18.2%)     | 1(3.2%)      | 7(10.9%)           |
| High deprivation     | 4(12.1%)     | 7(22.6%)     | 11(17.2%)          |
| Average              | 8(24.2%)     | 8(25.8%)     | 16(25%)            |
| Low deprivation      | 6(18.2%)     | 9(29%)       | 15(23.4%)          |
| Least deprived       | 9(27.3%)     | 6(19.4%)     | 15(23.4%)          |
| Weight (KG)          |              |              |                    |
| n                    | 33           | 31           | 64                 |
| Mean(SD)             | 65.5(18)     | 63.7(15.6)   | 64.6(16.8)         |
| Median(IQR)          | 63(53,76)    | 62.9(49,74)  | 63(52.9,74.3)      |
| Min,Max              | (35,128)     | (35.6,103.7) | (35,128)           |
| Height (cm)          |              |              |                    |
| n                    | 33           | 31           | 64                 |
| Mean(SD)             | 168.6(10.5)  | 167.7(9.6)   | 168.2(10)          |
| Median(IQR)          | 170(162,177) | 168(159,175) | 168.5(160.5,175.5) |
| Min,Max              | (147,193)    | (149,186)    | (147,193)          |
| BMI                  |              |              |                    |
| n                    | 33           | 31           | 64                 |
| Mean(SD)             | 22.8(5)      | 22.4(4.3)    | 22.6(4.6)          |

|             |                 |                 |                   |
|-------------|-----------------|-----------------|-------------------|
| Median(IQR) | 22.2(19.7,25.3) | 22.1(19.1,25.4) | 22.1(19.55,25.35) |
| Min,Max     | (15.8,42.8)     | (16,33.9)       | (15.8,42.8)       |

Table 4: Baseline CF measures by treatment arm

|                                                             | Intervention    | Control         | Overall         |
|-------------------------------------------------------------|-----------------|-----------------|-----------------|
| No. of IV days in previous 12 months                        |                 |                 |                 |
| n                                                           | 33              | 31              | 64              |
| Mean(SD)                                                    | 26.3(25.7)      | 26(22.1)        | 26.2(23.8)      |
| Median(IQR)                                                 | 17(7,44)        | 28(0,44)        | 17(7,44)        |
| Min,Max                                                     | (0,117)         | (0,70)          | (0,117)         |
| No. of participants requiring IV days in previous 12 months |                 |                 |                 |
| At least 1 IV day                                           | 26(78.8%)       | 23(74.2%)       | 49(76.6%)       |
| Days since last IV start date                               |                 |                 |                 |
| n                                                           | 31              | 28              | 59              |
| Mean(SD)                                                    | 168.7(245.2)    | 202.3(325.2)    | 184.6(283.9)    |
| Median(IQR)                                                 | 75(45,194)      | 100(24.5,219.5) | 91(39,213)      |
| Min,Max                                                     | (6,1085)        | (7,1575)        | (6,1575)        |
| FEV1                                                        |                 |                 |                 |
| n                                                           | 33              | 31              | 64              |
| Mean(SD)                                                    | 2(0.8)          | 2.3(1)          | 2.1(0.9)        |
| Median(IQR)                                                 | 1.9(1.4,2.4)    | 2.1(1.6,2.8)    | 1.9(1.5,2.7)    |
| Min,Max                                                     | (0.8,4)         | (0.6,5)         | (0.6,5)         |
| FEV1 % Predicted                                            |                 |                 |                 |
| n                                                           | 33              | 31              | 64              |
| Mean(SD)                                                    | 53.4(19.4)      | 61.4(22.7)      | 57.3(21.3)      |
| Median(IQR)                                                 | 49.2(39.4,61.9) | 53.4(43,80)     | 49.6(41.9,76.7) |
| Min,Max                                                     | (26,103)        | (23.2,100.7)    | (23.2,103)      |
| Clinician pseudomonas status                                |                 |                 |                 |
| Negative                                                    | 15(45.5%)       | 8(26.7%)        | 23(36.5%)       |
| Intermittent                                                | 3(9.1%)         | 3(10%)          | 6(9.5%)         |
| Chronic                                                     | 15(45.5%)       | 19(63.3%)       | 34(54%)         |
| Leeds Criteria pseudomonas status                           |                 |                 |                 |
| Negative                                                    | 15(45.5%)       | 10(33.3%)       | 25(39.7%)       |
| Intermittent                                                | 4(12.1%)        | 4(13.3%)        | 8(12.7%)        |
| Chronic                                                     | 14(42.4%)       | 16(53.3%)       | 30(47.6%)       |

## Subjective adherence

|                                            |              |              |              |
|--------------------------------------------|--------------|--------------|--------------|
| n                                          | 23           | 20           | 43           |
| Mean(SD)                                   | 65.6(40.1)   | 67.8(35.4)   | 66.6(37.6)   |
| Median(IQR)                                | 90(20,99)    | 80(45,99.5)  | 90(35,99)    |
| Min,Max                                    | (0,100)      | (0,100)      | (0,100)      |
| Simple normative adherence (first 2 weeks) |              |              |              |
| n                                          | 33           | 31           | 64           |
| Mean(SD)                                   | 0.5(0)       | 0.5(0)       | 0.5(0)       |
| Median(IQR)                                | 0.5(0.5,0.5) | 0.5(0.5,0.5) | 0.5(0.5,0.5) |
| Min,Max                                    | (0.5,0.5)    | (0.5,0.5)    | (0.5,0.5)    |
| Treatment Burden                           |              |              |              |
| Low                                        | 10(30.3%)    | 11(35.5%)    | 21(32.8%)    |
| Medium                                     | 16(48.5%)    | 12(38.7%)    | 28(43.8%)    |
| High                                       | 2(6.1%)      | 5(16.1%)     | 7(10.9%)     |

**Baseline outcome measures***Table 5: Baseline outcome measures by treatment arm*

|             | Intervention       | Control            | Overall            |
|-------------|--------------------|--------------------|--------------------|
| EQ5D-5L     |                    |                    |                    |
| n           | 33                 | 31                 | 64                 |
| Mean(SD)    | 0.866(0.121)       | 0.822(0.151)       | 0.845(0.137)       |
| Median(IQR) | 0.901(0.767,0.951) | 0.825(0.737,0.942) | 0.872(0.752,0.946) |
| Min,Max     | (0.53,1)           | (0.486,1)          | (0.486,1)          |
| PAM-13      |                    |                    |                    |
| n           | 33                 | 31                 | 64                 |
| Mean(SD)    | 60.4(11.2)         | 60(13.2)           | 60.2(12.1)         |
| Median(IQR) | 60.6(53.2,67.8)    | 58.1(48.9,67.8)    | 60.6(51,67.8)      |
| Min,Max     | (36.8,84.8)        | (38.1,90.7)        | (36.8,90.7)        |
| CHAOS       |                    |                    |                    |
| n           | 33                 | 31                 | 64                 |
| Mean(SD)    | 9.8(3.4)           | 10.1(4)            | 10(3.7)            |
| Median(IQR) | 10(8,11)           | 10(7,12)           | 10(8,11)           |
| Min,Max     | (4,18)             | (4,20)             | (4,20)             |
| MAD-3       |                    |                    |                    |
| n           | 32                 | 30                 | 62                 |
| Mean(SD)    | 9.8(3.3)           | 9(3.4)             | 9.4(3.4)           |

|             |           |           |            |
|-------------|-----------|-----------|------------|
| Median(IQR) | 9(8,12.5) | 9.5(6,11) | 9(8,12)    |
| Min,Max     | (3,15)    | (3,15)    | (3,15)     |
| SRBAI       |           |           |            |
| n           | 33        | 30        | 63         |
| Mean(SD)    | 11.5(4.9) | 10.2(5.6) | 10.9(5.2)  |
| Median(IQR) | 12(8,16)  | 9(4,14)   | 10(7,15)   |
| Min,Max     | (4,20)    | (4,20)    | (4,20)     |
| GAD-7       |           |           |            |
| n           | 33        | 31        | 64         |
| Mean(SD)    | 4.1(4.5)  | 3.8(3.6)  | 3.9(4)     |
| Median(IQR) | 3(0,5)    | 3(1,7)    | 3(0.5,5.5) |
| Min,Max     | (0,15)    | (0,11)    | (0,15)     |
| PHQ-8       |           |           |            |
| n           | 33        | 31        | 64         |
| Mean(SD)    | 7(4.9)    | 6.5(5.2)  | 6.8(5)     |
| Median(IQR) | 6(3,12)   | 6(3,8)    | 6(3,10.5)  |
| Min,Max     | (0,16)    | (0,18)    | (0,18)     |

Table 6: Baseline CFQR domains by treatment arm

|                       | Intervention | Control    | Overall      |
|-----------------------|--------------|------------|--------------|
| Physical Functioning  |              |            |              |
| n                     | 33           | 31         | 64           |
| Mean(SD)              | 48.5(34.8)   | 49.2(30.8) | 48.9(32.7)   |
| Median(IQR)           | 38(25,88)    | 42(17,83)  | 42(21,85.5)  |
| Min,Max               | (0,100)      | (0,100)    | (0,100)      |
| Emotional Functioning |              |            |              |
| n                     | 33           | 31         | 64           |
| Mean(SD)              | 70.2(21.1)   | 62.3(26.1) | 66.4(23.8)   |
| Median(IQR)           | 67(53,93)    | 67(40,80)  | 67(53,87)    |
| Min,Max               | (27,100)     | (7,100)    | (7,100)      |
| Eating                |              |            |              |
| n                     | 33           | 31         | 64           |
| Mean(SD)              | 79.9(24.8)   | 74.6(27.7) | 77.3(26.2)   |
| Median(IQR)           | 89(67,100)   | 78(56,100) | 89(61.5,100) |
| Min,Max               | (0,100)      | (0,100)    | (0,100)      |
| Social Functioning    |              |            |              |
| n                     | 33           | 31         | 64           |

|    |                    |            |            |            |
|----|--------------------|------------|------------|------------|
| 1  |                    |            |            |            |
| 2  |                    |            |            |            |
| 3  | Mean(SD)           | 65(20.3)   | 59.6(26.2) | 62.4(23.3) |
| 4  | Median(IQR)        | 67(50,78)  | 61(44,83)  | 67(44,83)  |
| 5  | Min,Max            | (17,100)   | (11,100)   | (11,100)   |
| 6  |                    |            |            |            |
| 7  | Body Image         |            |            |            |
| 8  |                    |            |            |            |
| 9  | n                  | 33         | 31         | 64         |
| 10 | Mean(SD)           | 68.5(27.3) | 64.9(31.7) | 66.7(29.3) |
| 11 | Median(IQR)        | 78(56,89)  | 67(44,100) | 78(44,89)  |
| 12 | Min,Max            | (0,100)    | (0,100)    | (0,100)    |
| 13 |                    |            |            |            |
| 14 | Treatment Burden   |            |            |            |
| 15 |                    |            |            |            |
| 16 | n                  | 33         | 31         | 64         |
| 17 | Mean(SD)           | 50.5(16.5) | 51.6(25.9) | 51(21.4)   |
| 18 | Median(IQR)        | 44(44,67)  | 56(33,67)  | 50(44,67)  |
| 19 | Min,Max            | (11,78)    | (0,100)    | (0,100)    |
| 20 |                    |            |            |            |
| 21 | Respiratory        |            |            |            |
| 22 |                    |            |            |            |
| 23 | n                  | 33         | 31         | 64         |
| 24 | Mean(SD)           | 53.5(27.5) | 54(27.3)   | 53.7(27.2) |
| 25 | Median(IQR)        | 50(33,78)  | 56(33,78)  | 56(33,78)  |
| 26 | Min,Max            | (0,100)    | (6,100)    | (0,100)    |
| 27 |                    |            |            |            |
| 28 | Digestion          |            |            |            |
| 29 |                    |            |            |            |
| 30 | n                  | 33         | 31         | 64         |
| 31 | Mean(SD)           | 77.9(16.9) | 80.4(26.4) | 79.1(21.9) |
| 32 | Median(IQR)        | 78(67,89)  | 89(78,100) | 89(67,100) |
| 33 | Min,Max            | (44,100)   | (0,100)    | (0,100)    |
| 34 |                    |            |            |            |
| 35 | Role Functioning   |            |            |            |
| 36 |                    |            |            |            |
| 37 | n                  | 33         | 31         | 64         |
| 38 | Mean(SD)           | 65.2(24.3) | 64(25.9)   | 64.6(24.9) |
| 39 | Median(IQR)        | 67(50,83)  | 67(42,83)  | 67(50,83)  |
| 40 | Min,Max            | (0,100)    | (8,100)    | (0,100)    |
| 41 |                    |            |            |            |
| 42 | Vitality           |            |            |            |
| 43 |                    |            |            |            |
| 44 | n                  | 33         | 31         | 64         |
| 45 | Mean(SD)           | 37.8(22.8) | 40.6(22)   | 39.2(22.3) |
| 46 | Median(IQR)        | 33(17,50)  | 42(25,58)  | 42(25,58)  |
| 47 | Min,Max            | (8,92)     | (0,75)     | (0,92)     |
| 48 |                    |            |            |            |
| 49 | Health Perceptions |            |            |            |
| 50 |                    |            |            |            |
| 51 | n                  | 33         | 31         | 64         |
| 52 | Mean(SD)           | 47.8(27.7) | 51.6(24.9) | 49.6(26.3) |
| 53 | Median(IQR)        | 44(22,67)  | 56(33,67)  | 44(33,67)  |
| 54 |                    |            |            |            |
| 55 |                    |            |            |            |
| 56 |                    |            |            |            |
| 57 |                    |            |            |            |
| 58 |                    |            |            |            |
| 59 |                    |            |            |            |
| 60 |                    |            |            |            |

|             |             |            |              |
|-------------|-------------|------------|--------------|
| Min,Max     | (0,100)     | (0,100)    | (0,100)      |
| Weight      |             |            |              |
| n           | 33          | 31         | 64           |
| Mean(SD)    | 70.7(36.1)  | 63.4(39.8) | 67.2(37.9)   |
| Median(IQR) | 100(33,100) | 67(33,100) | 83.5(33,100) |
| Min,Max     | (0,100)     | (0,100)    | (0,100)      |

Table 7: Baseline COM-BMQ domains by treatment arm

|                            | Intervention | Control      | Overall      |
|----------------------------|--------------|--------------|--------------|
| <b>COM BMQ Necessities</b> |              |              |              |
| n                          | 33           | 31           | 64           |
| Mean(SD)                   | 3.2(0.7)     | 3.4(0.8)     | 3.3(0.8)     |
| Median(IQR)                | 3.1(2.7,3.7) | 3.3(2.9,4.1) | 3.1(2.7,4)   |
| Min,Max                    | (2,4.9)      | (2,4.7)      | (2,4.9)      |
| <b>COM BMQ Concerns</b>    |              |              |              |
| n                          | 33           | 31           | 64           |
| Mean(SD)                   | 2.1(0.6)     | 2.2(0.6)     | 2.1(0.6)     |
| Median(IQR)                | 2.1(1.5,2.6) | 2.1(1.7,2.6) | 2.1(1.6,2.6) |
| Min,Max                    | (1.2,3.4)    | (1.1,3.3)    | (1.1,3.4)    |

### Primary Analysis

- In total, there were 79 exacerbations in participants followed up for at least 6 months
- Of these, 60 exacerbations fitted our criteria to be included in the primary analysis
  - 18 were not treated with IV antibiotics
  - 1 did not meet any Fuchs criteria
- A total of 60 participants had at least 6 months of exacerbation data (Intervention=32, Control =28)
- 4 participants were excluded
  - 2 died (Control=2)
  - 1 withdrew consent (Control=1)
  - 1 lost to follow up before 6 months (Intervention=1)
- 35 exacerbations occurred in Intervention participants, 25 occurred in Control participants
- 33 participants experienced at least 1 exacerbation (Intervention= 19 (60%), Control= 14 (50%))

The most frequently reported Fuchs criteria (Table 9) were 'Increased cough' (n=52) and 'Change in sputum (n=48). The median number of Fuchs criteria reported per exacerbation included in the primary analysis was 4 (IQR=4,6).

The median IV course length of exacerbations included in the primary analysis was 14 days in both the intervention and usual care arm (Table 12).



1  
2  
3 As ACtiF was a pilot study, it was not powered to detect an intervention effect. However,  
4 differences between treatment arms and their 95% confidence intervals have been calculated  
5 (Table 13). The median number of exacerbations was 1 in the intervention arm and 0.5 in the  
6 usual care arm. Following adjustment for site and the number of IV days in the previous year,  
7 adjusted IRR was 1.12 (95% CI: 0.658-1.94). This demonstrates a small increase in  
8 exacerbations in the intervention arm, however the confidence intervals are relatively wide. The  
9 IRR from the offset model shows an IRR of 0.958 (95% CI: 0.615,1.5). Here, a small decrease in  
10 exacerbations can be observed. As with the previous model, the confidence interval is relatively  
11 wide.  
12  
13  
14  
15  
16  
17  
18  
19  
20  
21  
22  
23  
24  
25  
26  
27  
28  
29  
30  
31  
32  
33  
34  
35  
36  
37  
38  
39  
40  
41  
42  
43  
44  
45  
46  
47  
48  
49  
50  
51  
52  
53  
54  
55  
56  
57  
58  
59  
60

**Exacerbations summary**

**Number of Exacerbations**

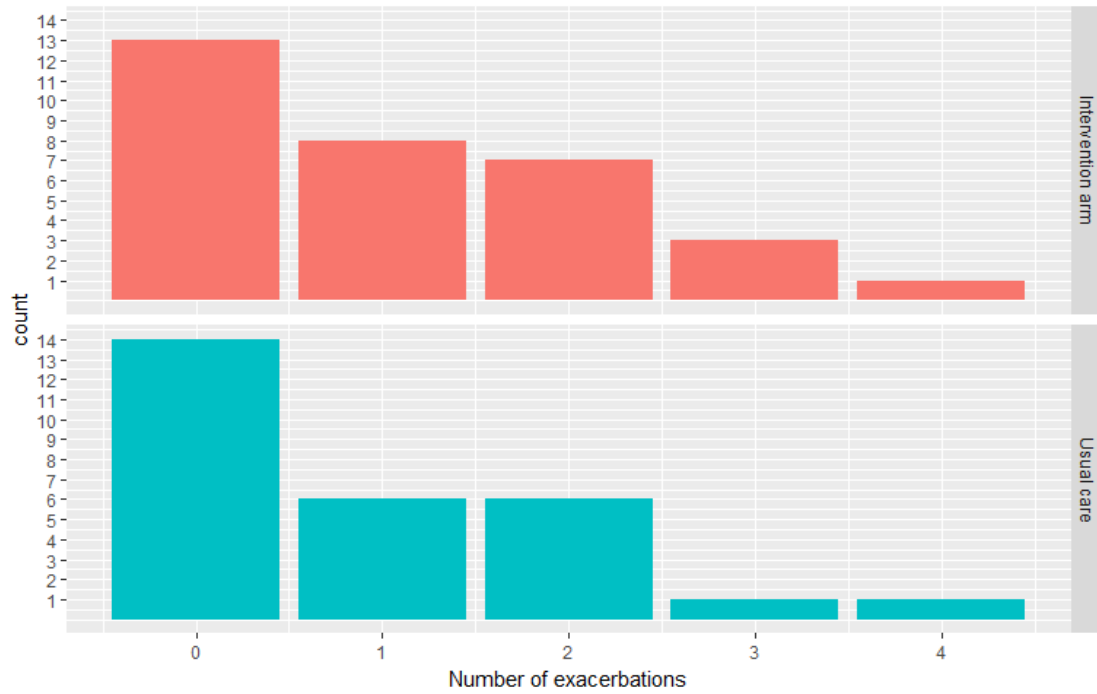

Figure 2: The number of exacerbations in participants by treatment arm in 6 months [n=60]

**Fuchs Criteria***Table 8: The number of each Fuchs criterion in the exacerbations used as the primary outcome*

|                                                                                                                                | n (%) for exacerbations in 6 months after consent and meeting our criteria (primary outcome) | n (%) for exacerbations treated with IV antibiotics and met at least one Fuchs criteria | n (%) for any exacerbation during the study |
|--------------------------------------------------------------------------------------------------------------------------------|----------------------------------------------------------------------------------------------|-----------------------------------------------------------------------------------------|---------------------------------------------|
| <b>Change in sputum</b>                                                                                                        | 48 ( 80 %)                                                                                   | 63 ( 77.8 %)                                                                            | 69 ( 69 %)                                  |
| <b>New or increased hemoptysis</b>                                                                                             | 12 ( 20 %)                                                                                   | 15 ( 18.5 %)                                                                            | 16 ( 16 %)                                  |
| <b>Increased cough</b>                                                                                                         | 52 ( 86.7 %)                                                                                 | 70 ( 86.4 %)                                                                            | 77 ( 77 %)                                  |
| <b>Increased dyspnea</b>                                                                                                       | 43 ( 71.7 %)                                                                                 | 56 ( 69.1 %)                                                                            | 61 ( 61 %)                                  |
| <b>Malaise, fatigue, or lethargy</b>                                                                                           | 48 ( 80 %)                                                                                   | 66 ( 81.5 %)                                                                            | 69 ( 69 %)                                  |
| <b>Temperature above 38 °C</b>                                                                                                 | 13 ( 21.7 %)                                                                                 | 18 ( 22.2 %)                                                                            | 20 ( 20 %)                                  |
| <b>Anorexia or weight loss</b>                                                                                                 | 20 ( 33.3 %)                                                                                 | 30 ( 37 %)                                                                              | 31 ( 31 %)                                  |
| <b>Sinus pain or tenderness</b>                                                                                                | 13 ( 21.7 %)                                                                                 | 19 ( 23.5 %)                                                                            | 21 ( 21 %)                                  |
| <b>Change in sinus discharge</b>                                                                                               | 13 ( 21.7 %)                                                                                 | 21 ( 25.9 %)                                                                            | 22 ( 22 %)                                  |
| <b>Change in physical examination of the chest, derived from notes by site staff.</b>                                          | 9 ( 15 %)                                                                                    | 12 ( 14.8 %)                                                                            | 13 ( 13 %)                                  |
| <b>Decrease in pulmonary function by 10 percent or more from a previously recorded value, derived from notes by site staff</b> | 12 ( 20 %)                                                                                   | 17 ( 21 %)                                                                              | 19 ( 19 %)                                  |
| <b>Radiographic changes indicative of pulmonary infection, derived from notes by site staff)</b>                               | 2 ( 3.3 %)                                                                                   | 2 ( 2.5 %)                                                                              | 2 ( 2 %)                                    |

Table 9: Summary of Fuchs criteria for the exacerbations that were included in the primary outcome (IV days and at least 1 Fuchs criteria in 6 month follow up period)

| Description                                            |              |
|--------------------------------------------------------|--------------|
| Exacerbations included in primary analysis             |              |
| n (%) with IV and at least 1 Fuchs                     | 60 ( 60 %)   |
| Mean (SD) number of Fuchs criteria                     | 4.8 ( 2.1 )  |
| Median (IQR) number of Fuchs criteria                  | 4 ( 4 , 6 )  |
| Min, max number of Fuchs criteria                      | (1,10)       |
| n (%) of exacerbations with at least 2 Fuchs criteria  | 58 ( 96.7 %) |
| n (%) of exacerbations with at least 3 Fuchs criteria  | 48 ( 80 %)   |
| n (%) of exacerbations with at least 4 Fuchs criteria  | 46 ( 76.7 %) |
| n (%) of exacerbations with at least 5 Fuchs criteria  | 29 ( 48.3 %) |
| n (%) of exacerbations with at least 6 Fuchs criteria  | 20 ( 33.3 %) |
| n (%) of exacerbations with at least 7 Fuchs criteria  | 12 ( 20 %)   |
| n (%) of exacerbations with at least 8 Fuchs criteria  | 8 ( 13.3 %)  |
| n (%) of exacerbations with at least 9 Fuchs criteria  | 3 ( 5 %)     |
| n (%) of exacerbations with at least 10 Fuchs criteria | 1 ( 1.7 %)   |

Table 10: Summary of the exacerbations in the 6 month follow up period that were not included in the primary outcome (IV days and at least 1 Fuchs criteria) and the reasons for exclusion

| Exacerbations in 6 months not meeting criteria for primary outcome |            |
|--------------------------------------------------------------------|------------|
| Total exacerbations excluded                                       | 19 ( 24 %) |
| n (%) with IV days but no Fuchs criteria met                       | 1 ( 1 %)   |
| n (%) with no IV but at least 1 Fuchs                              | 7 ( 8 %)   |
| n (%) no IV days or Fuchs recorded (missing values)                | 11 ( 14 %) |

### Length of IV course

Table 11: Summary of IV length by exacerbation and participant

|                                                        | Intervention | Usual Care |
|--------------------------------------------------------|--------------|------------|
| IV days per exacerbation in 6 months                   |              |            |
| n                                                      | 35           | 25         |
| Mean (SD)                                              | 13.6(4.2)    | 13.7(3.3)  |
| Median (IQR)                                           | 14(13,14)    | 14(13,15)  |
| Min, Max                                               | (2,30)       | (7,21)     |
| IV days per participant with exacerbations in 6 months |              |            |
| n                                                      | 19           | 14         |
| Mean (SD)                                              | 13.4(2.7)    | 13.6(3.2)  |
| Median (IQR)                                           | 14(11,14)    | 14(13,15)  |
| Min, Max                                               | (9,21.7)     | (8,20)     |
| IV days per exacerbation in whole study                |              |            |
| n                                                      | 45           | 36         |
| Mean (SD)                                              | 13.7(4.1)    | 13.9(3.1)  |
| Median (IQR)                                           | 14(13,14)    | 14(13,15)  |
| Min, Max                                               | (2,30)       | (7,21)     |

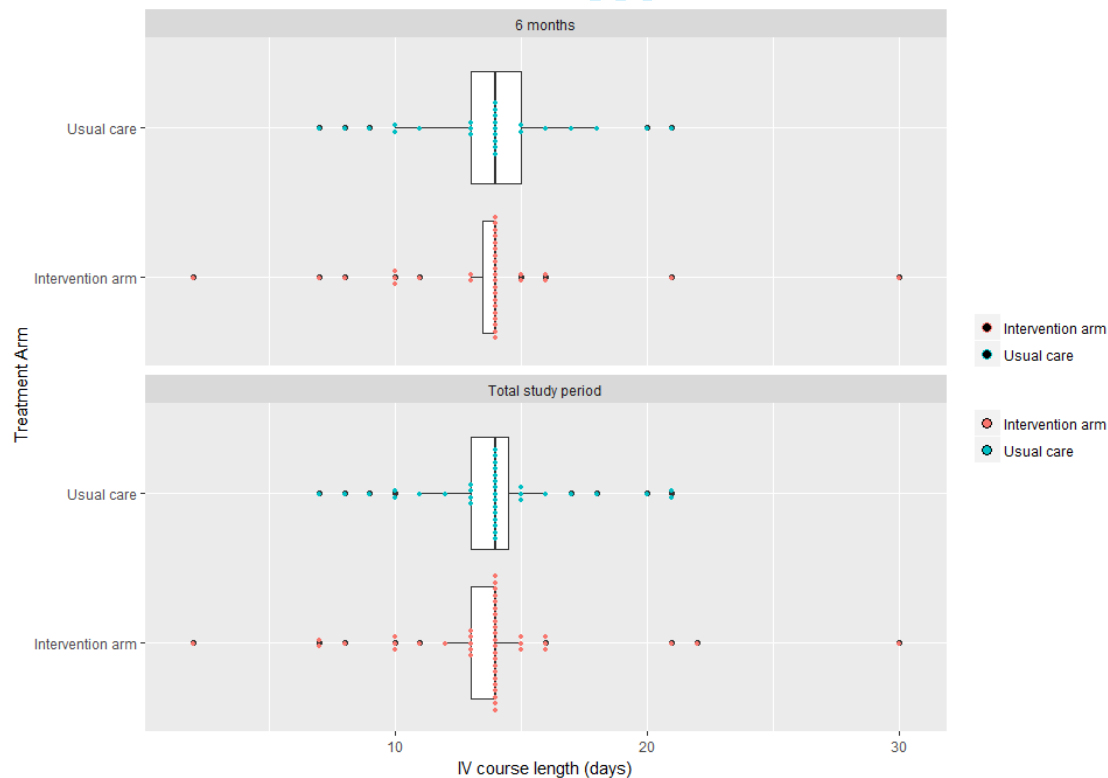

Figure 3: The length on IV courses by treatment arm

**Analysis models**

**6 month model**

*Table 12: Analysis of the primary clinical outcome, the number of exacerbations treated with IV antibiotics with at least 1 Fuchs criteria in a 6 month period adjusted for site and the number of IV days in the previous year.*

|            | Intervention n | Mean (SD)   | Median (IQR) | Control n | Mean (SD)   | Median (IQR)  | IRR  | 95% CI       |
|------------|----------------|-------------|--------------|-----------|-------------|---------------|------|--------------|
| Unadjusted | 32             | 1.1 ( 1.1 ) | 1 ( 0 , 2 )  | 28        | 0.9 ( 1.1 ) | 0.5 ( 0 , 2 ) | 1.22 | (0.686,2.21) |
| Adjusted   |                |             |              |           |             |               | 1.12 | (0.658,1.94) |

**Offset model**

*Table 13: A sensitivity analysis using all exacerbations treated with IV antibiotics with at least 1 Fuchs criteria that occurred during the study with the number of days of data collection included as an offset in the model. Adjusted for site and number of IV days in the previous year*

|                               | Intervention n | Total exacerbations (min,max) | Mean (SD) days followed up | Mean (SD) exacerbations per month | Control n | Total exacerbations (min,max) | Mean (SD) days followed up | Mean (SD) exacerbations per month | IRR   | 95% CI      |
|-------------------------------|----------------|-------------------------------|----------------------------|-----------------------------------|-----------|-------------------------------|----------------------------|-----------------------------------|-------|-------------|
| <b>Adjusted, Offset model</b> | 33             | 46(0,5)                       | 263.2(47.2)                | 0.17(0.16)                        | 31        | 40(0,5)                       | 250.5(74.8)                | 0.2(0.28)                         | 0.958 | (0.615,1.5) |

## Secondary analysis

Tables 15-16 show the results of the secondary analyses. As this is a pilot study, we have not powered to detect any effect. Key results are described below.

- Adjusted mean difference of 5% (95% CI: -2-12%) in FEV % predicted. This is an encouraging difference in the intervention arm.
- No notable differences in any of the other secondary outcomes but this is not of great concern as it is a pilot study.
- Fewer participants had BMI recorded than other outcomes (Intervention=18, Control=15).
- Small reduction in BMQ Concerns score in intervention arm (Mean difference=-0.21, 95% CI: -0.38,-0.048).

Figure 4 shows the distribution of the secondary outcome measures at baseline and follow up by treatment arm.

Table 14: Results of secondary effectiveness analysis

|                       | n<br>Intervention | Median (IQR)      | Mean<br>(SD) | n<br>Control | Median (IQR)      | Mean<br>(SD) | Mean<br>Diff | 95% CI         |
|-----------------------|-------------------|-------------------|--------------|--------------|-------------------|--------------|--------------|----------------|
| FEV1<br>Unadjusted    | 30                | 1.8(1.17,2.83)    | 2(0.9)       | 27           | 1.9(1.46,2.83)    | 2.2(1)       | -0.21        | (-0.73,0.3)    |
| FEV1 Adjusted         |                   |                   |              |              |                   |              | 0.22         | (-0.062,0.51)  |
| FEV1 %<br>Unadjusted  | 30                | 51.8(33.46,71.26) | 54.2(21.1)   | 27           | 50.9(42.49,77.97) | 59(23.9)     | -4.8         | (-17,7.1)      |
| FEV1 %<br>Adjusted    |                   |                   |              |              |                   |              | 5            | (-2,12)        |
| BMI Unadjusted        | 18                | 20.5(19.5,26)     | 22.1(4.2)    | 15           | 23.4(20.7,26.2)   | 23.8(3.5)    | -1.7         | (-4.5,1.1)     |
| BMI Adjusted          |                   |                   |              |              |                   |              | -0.08        | (-1,0.89)      |
| EQ5D-5L<br>Unadjusted | 31                | 0.9(0.76,0.95)    | 0.9(0.2)     | 27           | 0.9(0.77,1)       | 0.9(0.2)     | -0.00062     | (-0.084,0.083) |
| EQ5D-5L<br>Adjusted   |                   |                   |              |              |                   |              | -0.016       | (-0.087,0.055) |

|    |                |    |               |            |    |               |           |       |               |
|----|----------------|----|---------------|------------|----|---------------|-----------|-------|---------------|
| 1  |                |    |               |            |    |               |           |       |               |
| 2  |                |    |               |            |    |               |           |       |               |
| 3  | PAM-13         | 31 | 63.1(51,67.8) | 58.5(14.3) | 28 | 58.1(51,63.1) | 57.9(9.9) | 0.56  | (-5.9,7)      |
| 4  | Unadjusted     |    |               |            |    |               |           |       |               |
| 5  | PAM-13         |    |               |            |    |               |           | 0.046 | (-5.8,5.9)    |
| 6  | Adjusted       |    |               |            |    |               |           |       |               |
| 7  |                |    |               |            |    |               |           |       |               |
| 8  | CHAOS          | 31 | 9(7,13)       | 9.9(3.9)   | 28 | 9(7.5,11.5)   | 9.4(3.3)  | 0.55  | (-1.4,2.4)    |
| 9  | Unadjusted     |    |               |            |    |               |           |       |               |
| 10 | CHAOS          |    |               |            |    |               |           | 0.79  | (-0.47,2.1)   |
| 11 | Adjusted       |    |               |            |    |               |           |       |               |
| 12 |                |    |               |            |    |               |           |       |               |
| 13 | MAD-3          | 31 | 12(9,13)      | 10.8(3.9)  | 26 | 9.5(7,13)     | 9.4(3.6)  | 1.4   | (-0.58,3.4)   |
| 14 | Unadjusted     |    |               |            |    |               |           |       |               |
| 15 | MAD-3          |    |               |            |    |               |           | 0.82  | (-0.51,2.1)   |
| 16 | Adjusted       |    |               |            |    |               |           |       |               |
| 17 |                |    |               |            |    |               |           |       |               |
| 18 | SRBAI          | 31 | 13(8,16)      | 12.1(5.3)  | 28 | 10.5(6,15.5)  | 10.6(5)   | 1.4   | (-1.3,4.1)    |
| 19 | Unadjusted     |    |               |            |    |               |           |       |               |
| 20 | SRBAI Adjusted |    |               |            |    |               |           | 0.15  | (-1.8,2.1)    |
| 21 |                |    |               |            |    |               |           |       |               |
| 22 | GAD-7          | 31 | 3(1,6)        | 4.1(4.1)   | 28 | 2.5(0,7)      | 4.2(4.4)  | -0.05 | (-2.3,2.2)    |
| 23 | Unadjusted     |    |               |            |    |               |           |       |               |
| 24 | GAD-7          |    |               |            |    |               |           | -0.31 | (-1.9,1.3)    |
| 25 | Adjusted       |    |               |            |    |               |           |       |               |
| 26 |                |    |               |            |    |               |           |       |               |
| 27 | PHQ-8          | 31 | 7(4,12)       | 7.3(5.2)   | 28 | 4(1.5,7)      | 5.3(5.1)  | 2     | (-0.68,4.7)   |
| 28 | Unadjusted     |    |               |            |    |               |           |       |               |
| 29 | PHQ-8          |    |               |            |    |               |           | 0.97  | (-0.96,2.9)   |
| 30 | Adjusted       |    |               |            |    |               |           |       |               |
| 31 |                |    |               |            |    |               |           |       |               |
| 32 | COM-BMQ        | 31 | 2(1.5,2.3)    | 1.9(0.5)   | 27 | 2.1(1.9,2.4)  | 2.1(0.5)  | -0.22 | (-0.48,0.026) |
| 33 | Concerns       |    |               |            |    |               |           |       |               |
| 34 | Unadjusted     |    |               |            |    |               |           |       |               |
| 35 | COM-BMQ        |    |               |            |    |               |           | -0.21 | (-0.38,-      |
| 36 | Concerns       |    |               |            |    |               |           |       | 0.048)        |
| 37 | Adjusted       |    |               |            |    |               |           |       |               |
| 38 |                |    |               |            |    |               |           |       |               |
| 39 | COM BMQ        | 31 | 3.4(3,4)      | 3.5(0.6)   | 27 | 3.4(2.9,4)    | 3.5(0.7)  | 0.011 | (-0.35,0.37)  |
| 40 | Necessities    |    |               |            |    |               |           |       |               |
| 41 | Unadjusted     |    |               |            |    |               |           |       |               |
| 42 |                |    |               |            |    |               |           |       |               |
| 43 |                |    |               |            |    |               |           |       |               |
| 44 |                |    |               |            |    |               |           |       |               |
| 45 |                |    |               |            |    |               |           |       |               |
| 46 |                |    |               |            |    |               |           |       |               |
| 47 |                |    |               |            |    |               |           |       |               |



COM BMQ  
Necessities  
Adjusted

0.12 (-0.16,0.4)

Table 15: Results of secondary effectiveness analysis

|                                   | n<br>Intervention | Median<br>(IQR) | Mean<br>(SD) | n<br>Control | Median<br>(IQR) | Mean<br>(SD) | Mean<br>Diff | 95% CI     |
|-----------------------------------|-------------------|-----------------|--------------|--------------|-----------------|--------------|--------------|------------|
| CFQ-R Physical Unadjusted         | 31                | 54(25,88)       | 54.4(31.6)   | 28           | 62.5(33,92)     | 60.9(31.2)   | -6.4         | (-23,10)   |
| CFQ-R Physical Adjusted           |                   |                 |              |              |                 |              | -2.6         | (-13,7.4)  |
| CFQ-R Emotional State Unadjusted  | 31                | 67(53,93)       | 68.3(23.4)   | 28           | 73(56.5,90)     | 72.3(22.7)   | -4           | (-16,8)    |
| CFQ-R Emotional State Adjusted    |                   |                 |              |              |                 |              | -7.7         | (-16,0.55) |
| CFQ-R Eating Unadjusted           | 31                | 89(67,100)      | 80.7(21.6)   | 28           | 83.5(67,100)    | 79.9(20.7)   | 0.85         | (-10,12)   |
| CFQ-R Eating Adjusted             |                   |                 |              |              |                 |              | 1.1          | (-6.5,8.7) |
| CFQ-R Social Unadjusted           | 31                | 67(56,78)       | 65.4(15.8)   | 28           | 64(50,83)       | 66.4(20.9)   | -1           | (-11,8.6)  |
| CFQ-R Social Adjusted             |                   |                 |              |              |                 |              | -3.7         | (-10,2.8)  |
| CFQ-R Body Image Unadjusted       | 31                | 78(67,89)       | 73.3(23.8)   | 28           | 78(56,100)      | 73.1(25.5)   | 0.19         | (-13,13)   |
| CFQ-R Body Image Adjusted         |                   |                 |              |              |                 |              | 0.62         | (-7.2,8.5) |
| CFQ-R Treatment Burden Unadjusted | 31                | 56(44,67)       | 56.5(16.6)   | 28           | 56(44,67)       | 57.3(19.9)   | -0.83        | (-10,8.7)  |
| CFQ-R Treatment Burden Adjusted   |                   |                 |              |              |                 |              | 1.2          | (-6.4,8.8) |
| CFQ-R Respiratory Unadjusted      | 31                | 67(44,78)       | 59.5(25.2)   | 27           | 67(50,83)       | 65.6(22.7)   | -6.1         | (-19,6.6)  |
| CFQ-R Respiratory Adjusted        |                   |                 |              |              |                 |              | -4.4         | (-14,4.8)  |

|    |                          |    |            |            |    |               |            |      |           |
|----|--------------------------|----|------------|------------|----|---------------|------------|------|-----------|
| 1  |                          |    |            |            |    |               |            |      |           |
| 2  |                          |    |            |            |    |               |            |      |           |
| 3  | CFQ-R Digestion          | 31 | 89(67,100) | 81.1(18.4) | 27 | 89(78,100)    | 84.4(23.5) | -3.3 | (-14,7.7) |
| 4  | Unadjusted               |    |            |            |    |               |            |      |           |
| 5  | CFQ-R Digestion Adjusted |    |            |            |    |               |            | -2.3 | (-11,6.2) |
| 6  |                          |    |            |            |    |               |            |      |           |
| 7  | CFQ-R Role Unadjusted    | 31 | 75(33,83)  | 64.8(26.1) | 27 | 75(56,92)     | 70.3(21.5) | -5.6 | (-18,7.1) |
| 8  | CFQ-R Role Adjusted      |    |            |            |    |               |            | -8.2 | (-17,0.4) |
| 9  |                          |    |            |            |    |               |            |      |           |
| 10 | CFQ-R Vital Unadjusted   | 31 | 42(25,42)  | 38.5(19.5) | 28 | 50(33,62.5)   | 48.7(23)   | -10  | (-        |
| 11 |                          |    |            |            |    |               |            |      | 21,0.81)  |
| 12 | CFQ-R Vital Adjusted     |    |            |            |    |               |            | -7   | (-        |
| 13 |                          |    |            |            |    |               |            |      | 15,0.99)  |
| 14 | CFQ-R Health Unadjusted  | 31 | 44(22,67)  | 45.5(25.4) | 28 | 61.5(33,72.5) | 56.8(27.6) | -11  | (-25,2.6) |
| 15 | CFQ-R Health Adjusted    |    |            |            |    |               |            | -6.5 | (-16,2.8) |
| 16 |                          |    |            |            |    |               |            |      |           |
| 17 | CFQ-R Weight Unadjusted  | 31 | 89(67,100) | 81.1(18.4) | 27 | 89(78,100)    | 84.4(23.5) | -3.3 | (-14,7.7) |
| 18 | CFQ-R Weight Adjusted    |    |            |            |    |               |            | -2.3 | (-11,6.2) |
| 19 |                          |    |            |            |    |               |            |      |           |
| 20 |                          |    |            |            |    |               |            |      |           |
| 21 |                          |    |            |            |    |               |            |      |           |
| 22 |                          |    |            |            |    |               |            |      |           |
| 23 |                          |    |            |            |    |               |            |      |           |
| 24 |                          |    |            |            |    |               |            |      |           |
| 25 |                          |    |            |            |    |               |            |      |           |
| 26 |                          |    |            |            |    |               |            |      |           |
| 27 |                          |    |            |            |    |               |            |      |           |
| 28 |                          |    |            |            |    |               |            |      |           |
| 29 |                          |    |            |            |    |               |            |      |           |
| 30 |                          |    |            |            |    |               |            |      |           |
| 31 |                          |    |            |            |    |               |            |      |           |
| 32 |                          |    |            |            |    |               |            |      |           |
| 33 |                          |    |            |            |    |               |            |      |           |
| 34 |                          |    |            |            |    |               |            |      |           |
| 35 |                          |    |            |            |    |               |            |      |           |
| 36 |                          |    |            |            |    |               |            |      |           |
| 37 |                          |    |            |            |    |               |            |      |           |
| 38 |                          |    |            |            |    |               |            |      |           |
| 39 |                          |    |            |            |    |               |            |      |           |
| 40 |                          |    |            |            |    |               |            |      |           |
| 41 |                          |    |            |            |    |               |            |      |           |
| 42 |                          |    |            |            |    |               |            |      |           |
| 43 |                          |    |            |            |    |               |            |      |           |
| 44 |                          |    |            |            |    |               |            |      |           |
| 45 |                          |    |            |            |    |               |            |      |           |
| 46 |                          |    |            |            |    |               |            |      |           |
| 47 |                          |    |            |            |    |               |            |      |           |

1  
2  
3  
4  
5  
6  
7  
8  
9  
10  
11  
12  
13  
14  
15  
16  
17  
18  
19  
20  
21  
22  
23  
24  
25  
26  
27  
28  
29  
30  
31  
32  
33  
34  
35  
36  
37  
38  
39  
40  
41  
42  
43  
44  
45  
46  
47

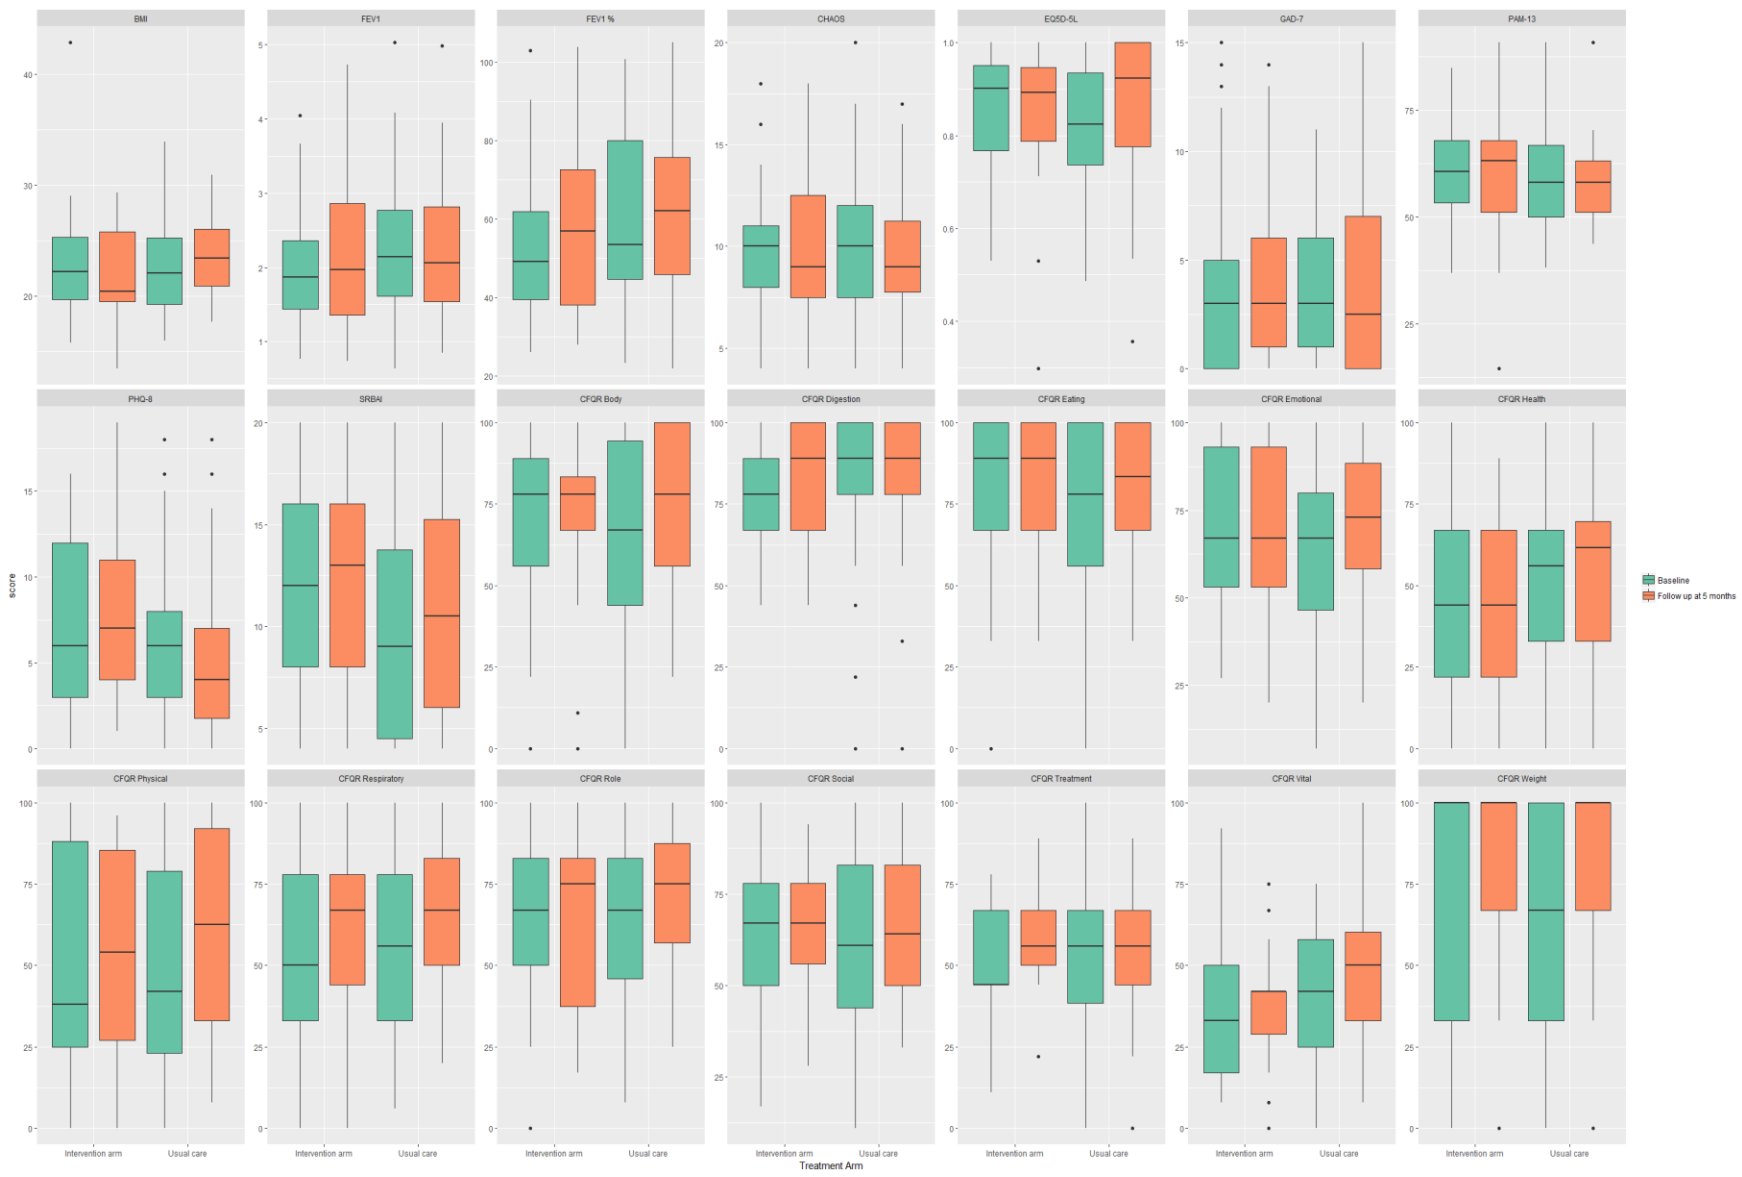

Figure 4: Box plots showing the distribution of secondary outcomes by treatment arm

1  
2  
3  
4  
5  
6  
7  
8  
9  
10  
11  
12  
13  
14  
15  
16  
17  
18  
19  
20  
21  
22  
23  
24  
25  
26  
27  
28  
29  
30  
31  
32  
33  
34  
35  
36  
37  
38  
39  
40  
41  
42  
43  
44  
45  
46  
47

For peer review only

### Adherence to CF medication

During the trial, 8 participants withdrew from adherence data collection (Intervention=4, Control=4). An exact date of withdrawal was not recorded but could be seen from inhalation data (last non zero number of daily inhalations). This has been improved for the main trial and date of adherence data collection withdrawal will be recorded.

Participants who withdrew from adherence data collection were removed from summaries of adherence for 6 months as they did not have 6 months' worth of data. Where possible, inhalation data collected before withdrawal was included in the mean adherence by arm in the monthly table and the plot by week. The number included in each of these estimates can be seen in Table 18.

Table 17 shows the mean adherence by treatment arm for the 6 months post randomisation. Adherence is greater in the intervention arm for each of the different adherence measures. A difference of 10% (95% CI: -5.2 to 25.2) in simple normative adherence with numerator adjustment can be observed in the intervention arm. Table 18 shows the difference in simple normative adherence with numerator adjustment by treatment arm for each individual month in the study. Adherence is greater in the Intervention arm in month 1 (mean difference=2.6, 95% CI: -13.5,18.6). Following month 1, adherence is consistently higher in the intervention arm with the greatest difference observed in month 5 (mean difference: 13%, 95% CI: -4.8, 30.8). These differences would indicate a potentially clinically important difference between the intervention and usual care arms.

The difference in adherence has been presented by weeks post randomisation in Figure 5. There is a difference in numerator adjusted normative adherence with greater adherence observed in the intervention arm. This difference becomes clear after week 4 which coincides with use of the intervention around week 2-3.

*Table 16: Summary of average adherences in 6 months following consent by intervention arm and the difference in means with 95% confidence intervals*

|                          | n<br>Intervention | Mean<br>Intervention | n<br>Control | Mean<br>Control | Mean Difference (95%<br>CI) |
|--------------------------|-------------------|----------------------|--------------|-----------------|-----------------------------|
| Baseline (first 2 weeks) | 29                | 25.9(31.4)           | 26           | 23.2(29)        | 2.6(-13.9,19.2)             |
| Total doses              | 29                | 222.4(233.1)         | 26           | 245.7(238.6)    | -23.3(-151.2,104.6)         |
| Unadjusted adherence     | 29                | 47.7(33.8)           | 26           | 37.7(27.1)      | 10(-6.5,26.4)               |
| Simple normative         | 29                | 45.5(32.8)           | 26           | 34.7(27)        | 10.8(-5.4,27)               |

|                                                   |    |            |    |            |                |
|---------------------------------------------------|----|------------|----|------------|----------------|
| Sophisticated normative                           | 29 | 41.6(33.4) | 26 | 34.2(27.1) | 7.5(-8.9,23.9) |
| Simple normative with numerator adjustment        | 29 | 43.6(30.4) | 26 | 33.6(25.9) | 10(-5.2,25.2)  |
| Sophisticated normative with numerator adjustment | 29 | 39.9(30.9) | 26 | 33.2(25.9) | 6.8(-8.6,22.2) |

*Table 17: Summary of average adherences in each month from following consent from 1 to 6 months by intervention arm*

|         | n<br>Intervention | Mean<br>Intervention | n<br>Control | Mean<br>Control | Mean Difference (95%<br>CI) |
|---------|-------------------|----------------------|--------------|-----------------|-----------------------------|
| Month 1 | 32                | 29.7(34.5)           | 28           | 27.2(27.5)      | 2.6(-13.5,18.6)             |
| Month 2 | 31                | 42.1(33.1)           | 28           | 33.7(31.5)      | 8.4(-8.5,25.2)              |
| Month 3 | 30                | 42.3(33.7)           | 28           | 33.3(34.8)      | 9(-9,27.1)                  |
| Month 4 | 29                | 42.7(34.7)           | 27           | 34.5(30.5)      | 8.2(-9.3,25.7)              |
| Month 5 | 29                | 42.8(36.2)           | 27           | 29.8(30.1)      | 13(-4.8,30.8)               |
| Month 6 | 29                | 41.3(36.5)           | 27           | 32.9(28.5)      | 8.4(-9.1,25.9)              |

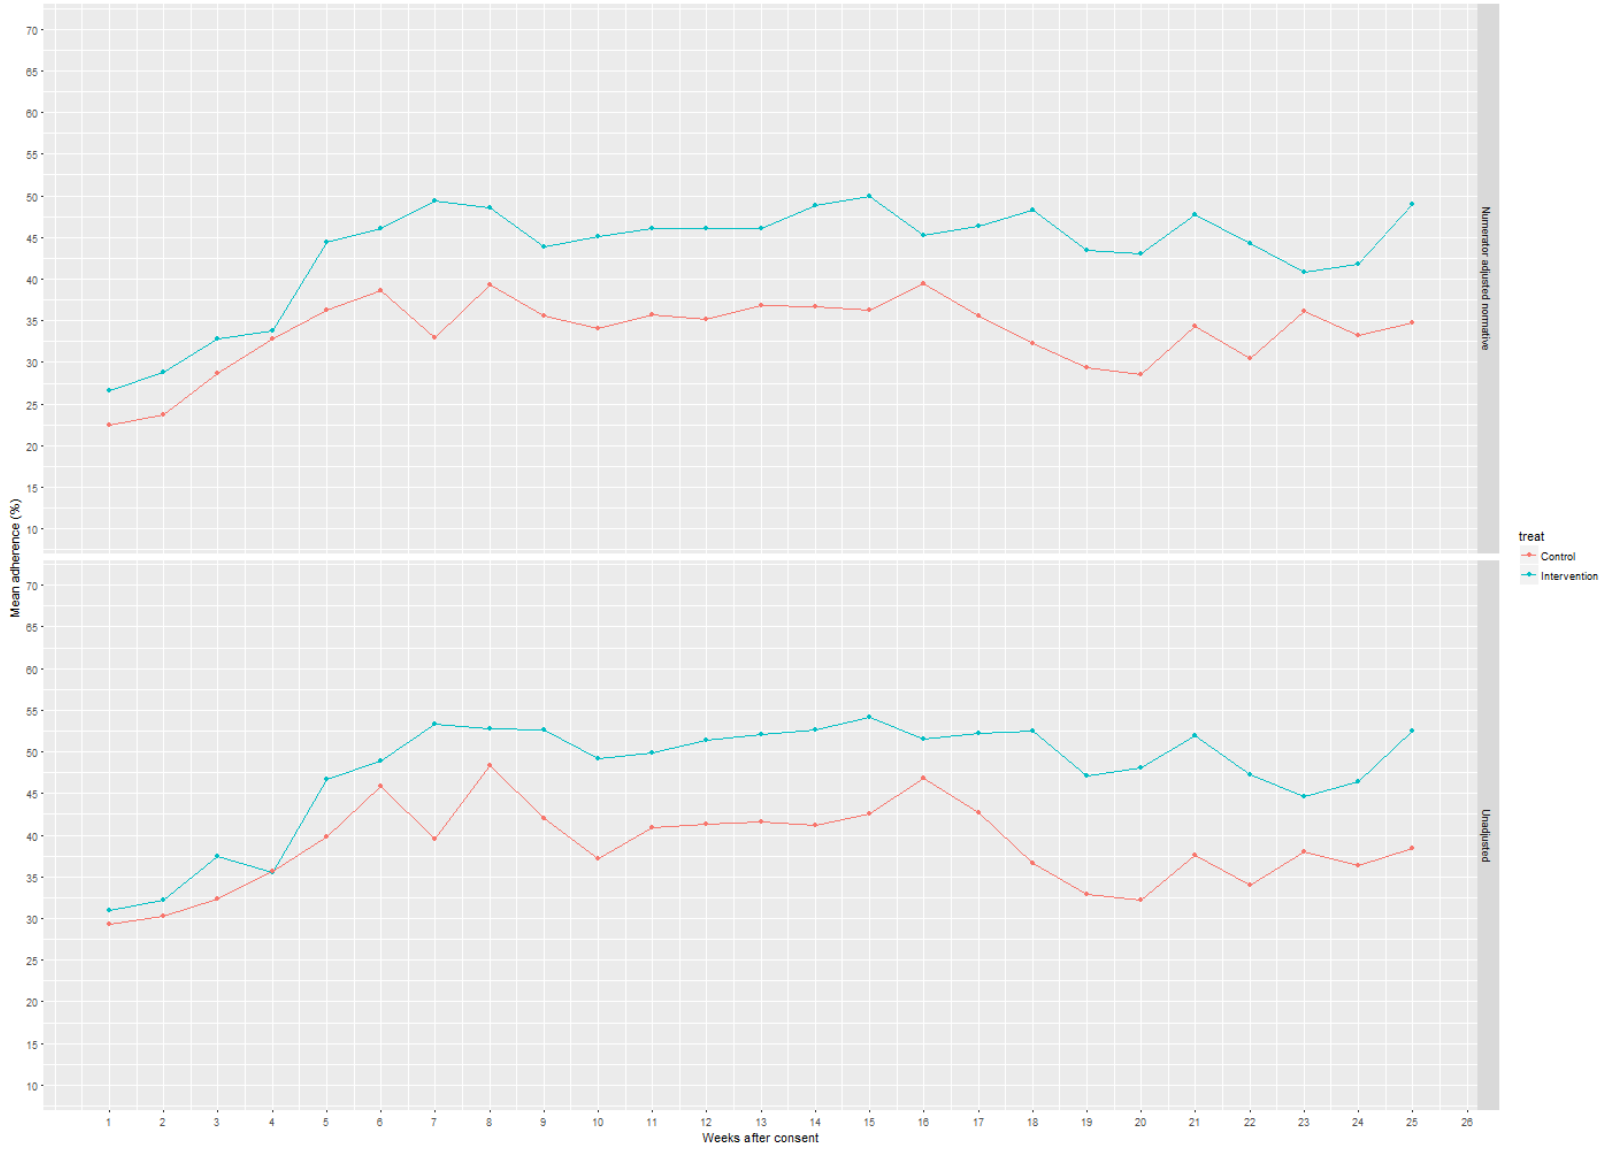

Figure 5: Mean weekly adherence by treatment arm

For peer review only

1  
2  
3  
4  
5  
6  
7  
8  
9  
10  
11  
12  
13  
14  
15  
16  
17  
18  
19  
20  
21  
22  
23  
24  
25  
26  
27  
28  
29  
30  
31  
32  
33  
34  
35  
36  
37  
38  
39  
40  
41  
42  
43  
44  
45  
46  
47



### Intervention adherence (Participants)

Table 19 shows the median number of CFHH interactions was 3 (IQR: 1-8). 3 participants had no interactions with CFHH and the maximum number of interactions was 44. The mean total duration of interaction time across the study was 49.3 (SD= 44.8) minutes. The mean length of an interaction by participant was 12.4 (SD=9.6) minutes and the mean length of all interactions was 6.6 (SD=11) minutes. The median number of days in the trial with interactions was 2 (IQR=1,7) by participant. Figure 6 shows the wide range of values across participants, particularly for the total duration of interactions.

Figure 7 shows when interactions occurred in days for each participant. Some participants were interacting fairly regularly, however most participants were inconsistent with their interactions. Figure 8 shows that the 'How am I doing?' pages were the most frequently visited in terms of the total number of clicks during the trial. 30 (90.9%) of participants visited the 'How am I doing?', 'Treatment' and 'Videos' page at least once (Table 20). 224 (91.4%) sessions included a visit to the 'How am I doing?' page.

Table 18: Summary of clicks in CFHH. An interaction is defined as a series of clicks with no greater than a 15 minute lag between clicks

|                                               |              |
|-----------------------------------------------|--------------|
| Interactions with CFHH by participant         |              |
| n                                             | 33           |
| Mean (SD)                                     | 7.4(11.6)    |
| Median (IQR)                                  | 3(1,8)       |
| Min, Max                                      | (0,44)       |
| Total duration of interactions by participant |              |
| n                                             | 33           |
| Mean (SD)                                     | 49.3(44.8)   |
| Median (IQR)                                  | 38(26,55)    |
| Min, Max                                      | (0,177)      |
| Mean duration of interactions by participant  |              |
| n                                             | 33           |
| Mean (SD)                                     | 12.4(9.6)    |
| Median (IQR)                                  | 10.7(4.3,19) |
| Min, Max                                      | (0,37)       |
| Days with interactions by participant         |              |
| n                                             | 33           |
| Mean (SD)                                     | 5.7(8.2)     |
| Median (IQR)                                  | 2(1,7)       |
| Min, Max                                      | (0,32)       |
| Duration of interactions                      |              |
| n                                             | 245          |
| Mean (SD)                                     | 6.6(11)      |
| Median (IQR)                                  | 1(0,8)       |
| Min, Max                                      | (0,57)       |

1  
2  
3  
4  
5  
6  
7  
8  
9  
10  
11  
12  
13  
14  
15  
16  
17  
18  
19  
20  
21  
22  
23  
24  
25  
26  
27  
28  
29  
30  
31  
32  
33  
34  
35  
36  
37  
38  
39  
40  
41  
42  
43  
44  
45  
46  
47

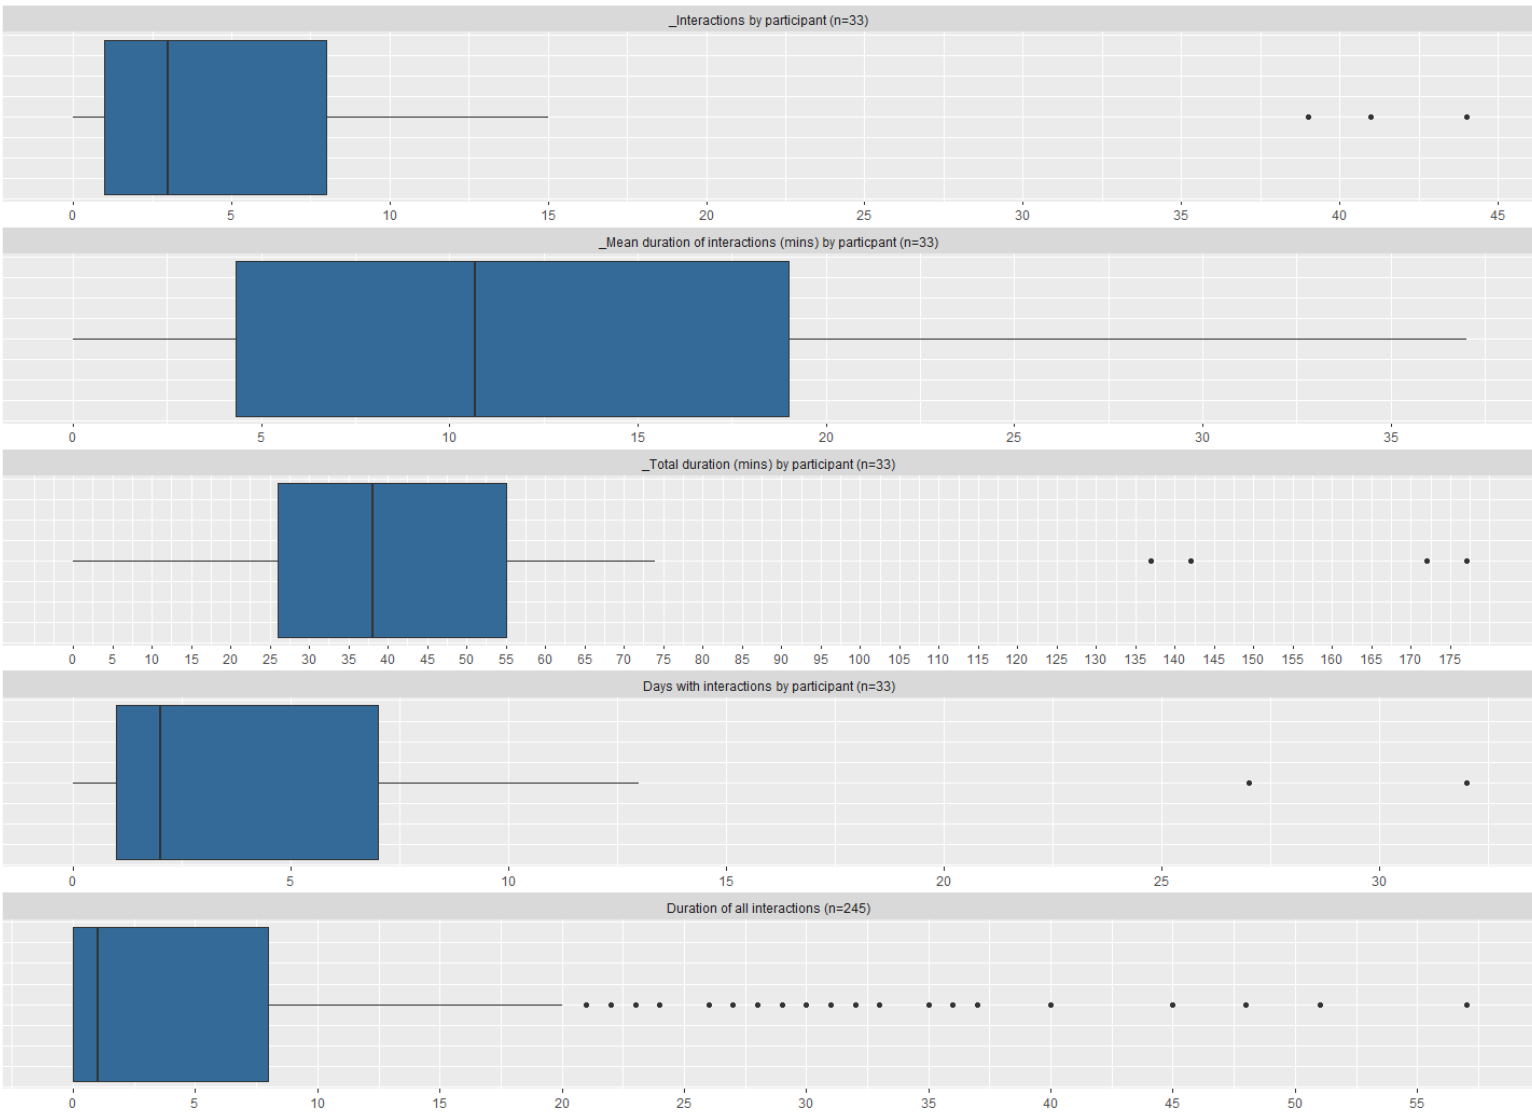

Figure 6: Boxplots showing summaries of click analytics in CFHH

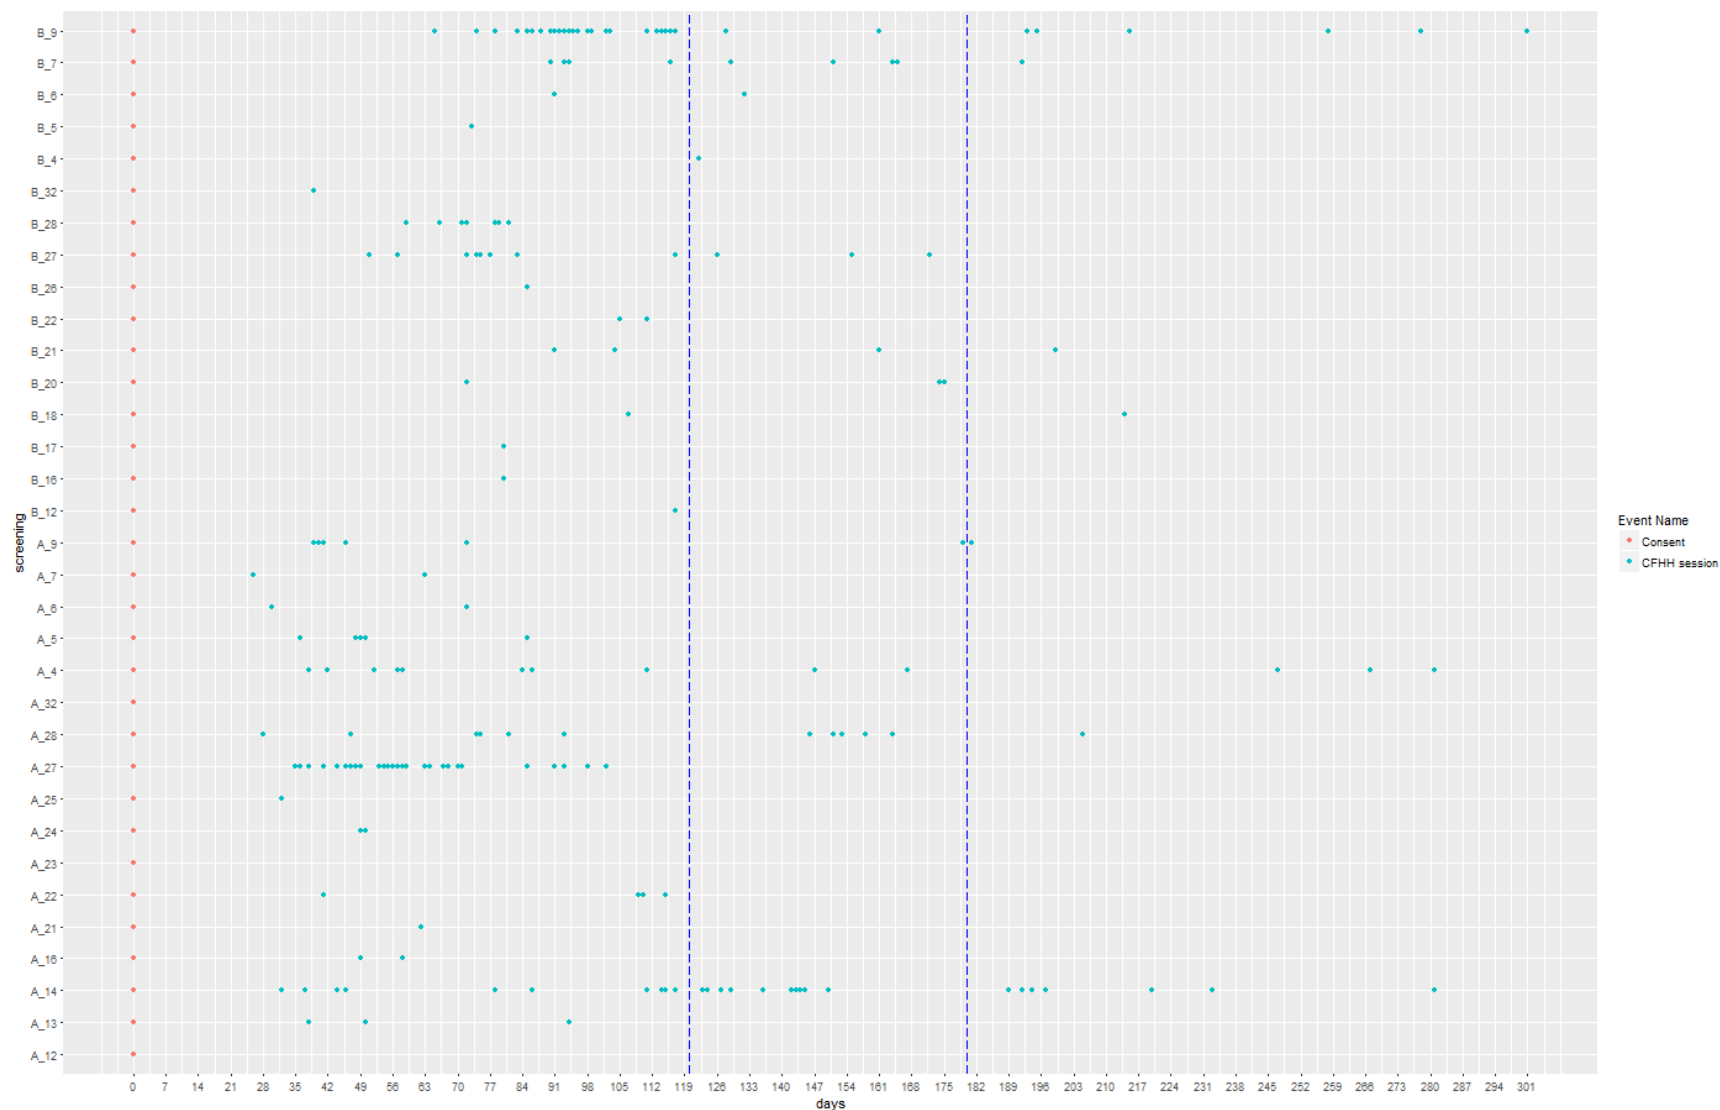

Figure 7: Timing in days of interactions with CFHH

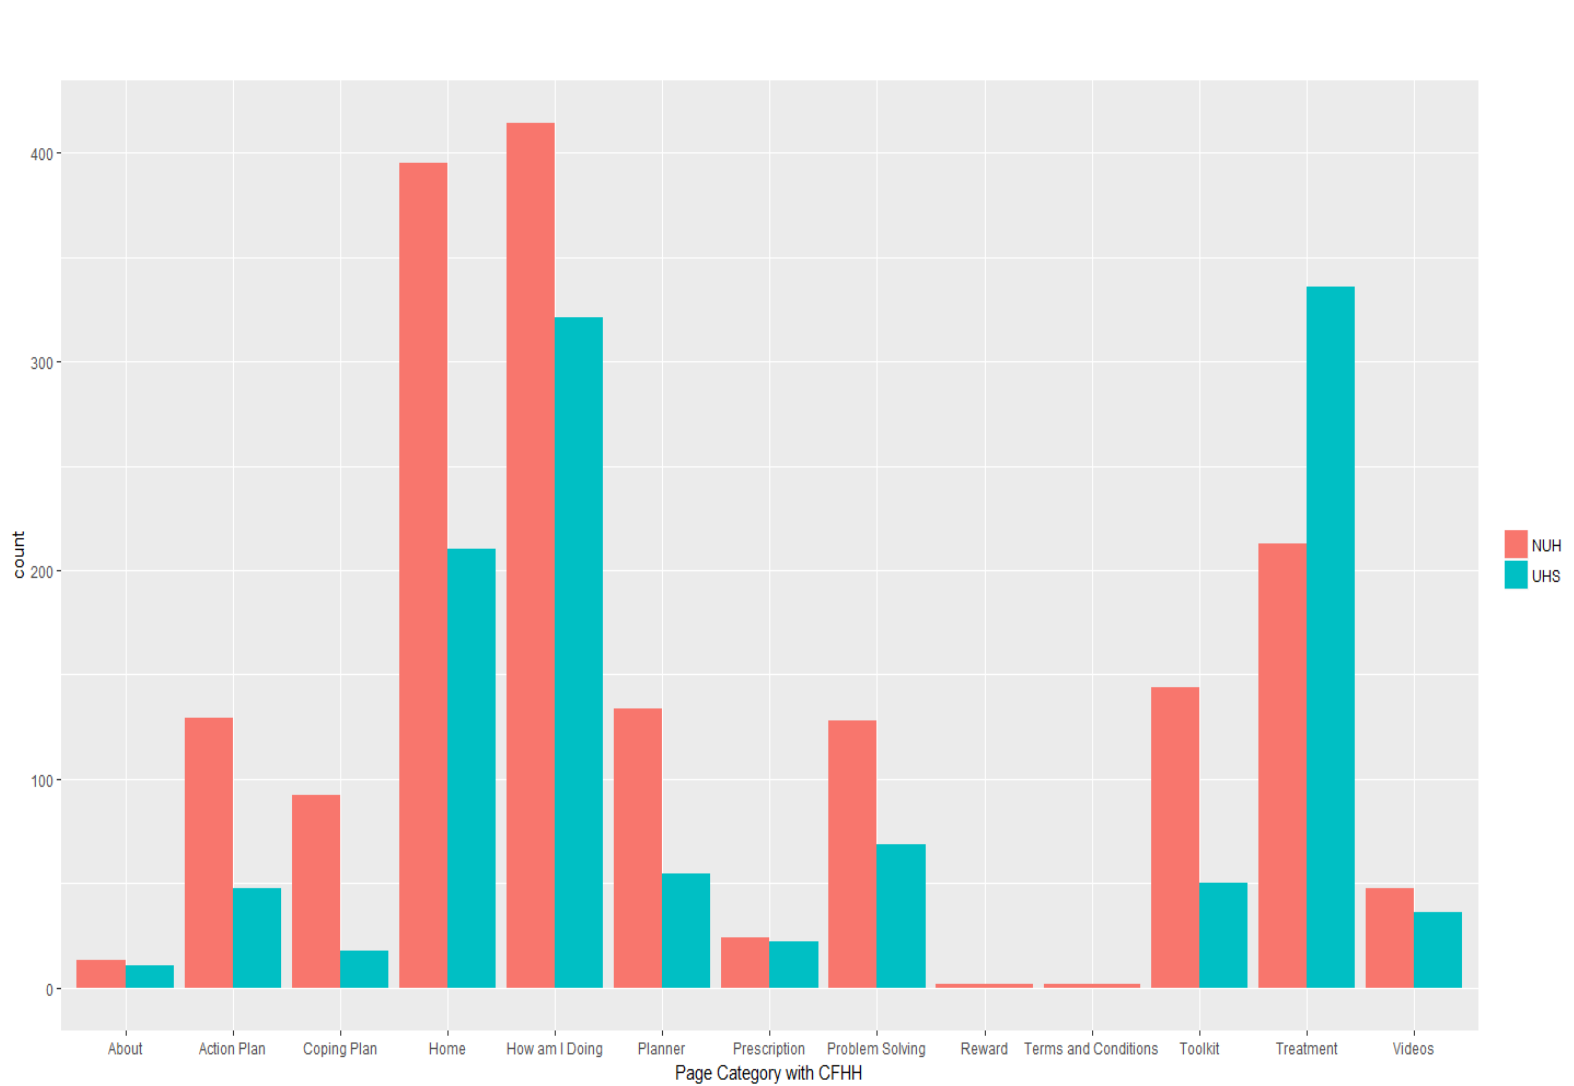

Figure 8: Frequency of clicks by CFHH categories

Table 19: Summary of clicks by page categories in CFHH

|                             | Total (%) clicks | Participants (%) with at least one click | Sessions (%) with at least one click |
|-----------------------------|------------------|------------------------------------------|--------------------------------------|
| <b>About</b>                | 24(0.8%)         | 13(39.4%)                                | 20(8.2%)                             |
| <b>Action Plan</b>          | 177(6.1%)        | 28(84.8%)                                | 53(21.6%)                            |
| <b>Coping Plan</b>          | 110(3.8%)        | 24(72.7%)                                | 38(15.5%)                            |
| <b>Home</b>                 | 605(20.8%)       | 30(90.9%)                                | 244(99.6%)                           |
| <b>How am I Doing</b>       | 735(25.2%)       | 30(90.9%)                                | 224(91.4%)                           |
| <b>Planner</b>              | 189(6.5%)        | 21(63.6%)                                | 39(15.9%)                            |
| <b>Prescription</b>         | 46(1.6%)         | 22(66.7%)                                | 42(17.1%)                            |
| <b>Problem Solving</b>      | 197(6.8%)        | 24(72.7%)                                | 44(18%)                              |
| <b>Reward</b>               | 2(0.1%)          | 2(6.1%)                                  | 2(0.8%)                              |
| <b>Terms and Conditions</b> | 2(0.1%)          | 2(6.1%)                                  | 2(0.8%)                              |
| <b>Toolkit</b>              | 194(6.7%)        | 24(72.7%)                                | 66(26.9%)                            |
| <b>Treatment</b>            | 549(18.8%)       | 30(90.9%)                                | 87(35.5%)                            |
| <b>Videos</b>               | 84(2.9%)         | 30(90.9%)                                | 62(25.3%)                            |

### Intervention fidelity (Clinicians)

Table 21 shows the median number of intervention sessions per participant was 3 (IQR= 2,4) with a mean duration of 36.1 (SD=23.9) minutes.

*Table 20: Summary of intervention sessions received by intervention participants during the study*

|                                                 |               |
|-------------------------------------------------|---------------|
| Sessions per participant                        |               |
| n                                               | 33            |
| Mean (SD)                                       | 3(1.6)        |
| Median (IQR)                                    | 3(2,4)        |
| Min, Max                                        | (0,6)         |
| Total time by participant                       |               |
| n                                               | 33            |
| Mean (SD)                                       | 114.2(46.9)   |
| Median (IQR)                                    | 100.5(90,125) |
| Min, Max                                        | (40,249)      |
| Time per session by participant                 |               |
| n                                               | 33            |
| Mean (SD)                                       | 37.3(14.2)    |
| Median (IQR)                                    | 31.3(28.3,48) |
| Min, Max                                        | (18,65)       |
| Time per session                                |               |
| n                                               | 99            |
| Mean (SD)                                       | 36.1(23.9)    |
| Median (IQR)                                    | 30(15,55)     |
| Min, Max                                        | (4,119)       |
| Intervention session per participant            |               |
| n                                               | 33            |
| Mean (SD)                                       | 0.9(0.3)      |
| Median (IQR)                                    | 1(1,1)        |
| Min, Max                                        | (0,1)         |
| Total Intervention session time per participant |               |
| n                                               | 29            |
| Mean (SD)                                       | 58.1(14.2)    |
| Median (IQR)                                    | 60(48,60)     |
| Min, Max                                        | (35,90)       |

## Review session per participant

|              |        |
|--------------|--------|
| n            | 33     |
| Mean (SD)    | 1(0.5) |
| Median (IQR) | 1(1,1) |
| Min, Max     | (0,2)  |

## Total Review session time per participant

|              |            |
|--------------|------------|
| n            | 29         |
| Mean (SD)    | 43.2(30.6) |
| Median (IQR) | 40(20,55)  |
| Min, Max     | (10,154)   |

## Preparation session per participant

|              |          |
|--------------|----------|
| n            | 33       |
| Mean (SD)    | 0.7(0.9) |
| Median (IQR) | 0(0,1)   |
| Min, Max     | (0,3)    |

## Total Preparation session time per participant

|              |           |
|--------------|-----------|
| n            | 14        |
| Mean (SD)    | 18.4(9.7) |
| Median (IQR) | 15(15,30) |
| Min, Max     | (4,35)    |

## Ad hoc sessions per participant

|              |          |
|--------------|----------|
| n            | 33       |
| Mean (SD)    | 0.4(0.6) |
| Median (IQR) | 0(0,1)   |
| Min, Max     | (0,2)    |

## Total ad hoc session time per participant

|              |           |
|--------------|-----------|
| n            | 12        |
| Mean (SD)    | 19.2(6.7) |
| Median (IQR) | 15(15,25) |
| Min, Max     | (15,30)   |



### Clinic visits

Participants completed a median of 2 clinic visits. This was consistent across treatment arms. The number of clinic visits by participant is similar across treatment arms (Figure 9).

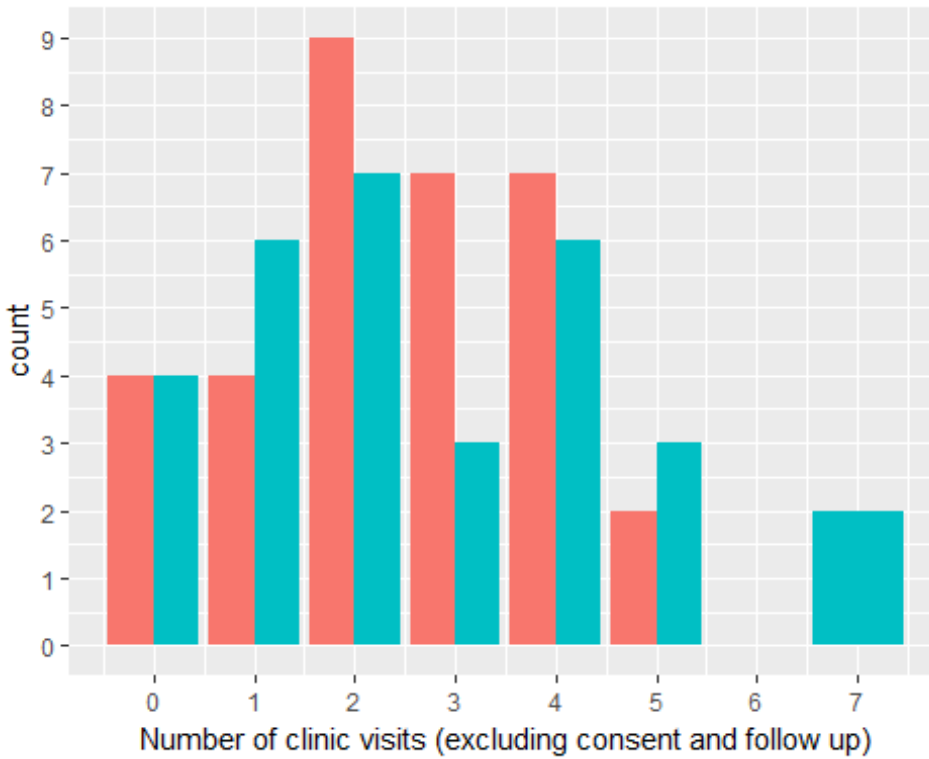

Figure 9: Barplot showing the number of participants for each number of clinic visits by treatment arm

## Safety analysis

A total of 8 adverse events (AEs) occurred during the trial and 7 participants (10.9%) had a least one AE (Table 22). 5 of these were deemed to be Serious Adverse Events (SAEs). None of the SAEs were related to the intervention.

Table 21: Summary of adverse events recorded during the study

|                                 | Intervention n (%) | Control n (%) | Overall n (%) |
|---------------------------------|--------------------|---------------|---------------|
| All Adverse Events              | 5                  | 3             | 8             |
| Participants with at least 1 AE | 4(12.1%)           | 3(9.7%)       | 7(10.9%)      |
| Type of Adverse Event           |                    |               |               |
| Chest pain or chest discomfort  | 1(25%)             | 0(0%)         | 1(14.3%)      |
| Voice change or Alteration      | 0(0%)              | 0(0%)         | 1(14.3%)      |
| Other                           | 4(100%)            | 2(66.7%)      | 6(85.7%)      |

Table 22: Summary of serious adverse events recorded during the study

|                                                 | Intervention n (%) | Control n (%) | Overall n (%) |
|-------------------------------------------------|--------------------|---------------|---------------|
| All Serious Adverse events                      | 3(9.1%)            | 2(6.5%)       | 5(7.8%)       |
| Level of Seriousness                            |                    |               |               |
| Death                                           | 0(0%)              | 2(100%)       | 2(40%)        |
| Hospitalisation                                 | 2(66.7%)           | 0(0%)         | 2(40%)        |
| Persistent or significant disability/incapacity | 1(33.3%)           | 0(0%)         | 1(20%)        |
| Frequency                                       |                    |               |               |
| Isolated                                        | 2(66.7%)           | 2(100%)       | 4(80%)        |
| Continuous                                      | 1(33.3%)           | 0(0%)         | 1(20%)        |
| Intensity                                       |                    |               |               |
| Moderate                                        | 3(100%)            | 0(0%)         | 3(60%)        |
| Severe                                          | 0(0%)              | 2(100%)       | 2(40%)        |
| Outcome                                         |                    |               |               |
| Recovered                                       | 1(33.3%)           | 0(0%)         | 1(20%)        |
| Improved                                        | 2(66.7%)           | 0(0%)         | 2(40%)        |
| Death                                           | 0(0%)              | 2(100%)       | 2(40%)        |
| Expected SAE                                    |                    |               |               |
| No                                              | 3(100%)            | 2(100%)       | 5(100%)       |
| Related to Intervention                         |                    |               |               |
| No                                              | 3(100%)            | 2(100%)       | 5(100%)       |

1  
2  
3  
4  
5  
6  
7  
8  
9  
10  
11  
12  
13  
14  
15  
16  
17  
18  
19  
20  
21  
22  
23  
24  
25  
26  
27  
28  
29  
30  
31  
32  
33  
34  
35  
36  
37  
38  
39  
40  
41  
42  
43  
44  
45  
46  
47  
48  
49  
50  
51  
52  
53  
54  
55  
56  
57  
58  
59  
60

For peer review only

Table 23: Description of serious adverse events recorded during the study (table has been redacted to maintain anonymity)

| Participant ID | Description of event                                                                                                                                                                                                                                             | Serious |
|----------------|------------------------------------------------------------------------------------------------------------------------------------------------------------------------------------------------------------------------------------------------------------------|---------|
| xxx_15         | Patient admitted on xx.xx.16 with acute exacerbation, developed type 2 respiratory failure. Despite maximal treatment of IV antibiotics, oxygen and NIV the patient continued to deteriorate and decision made to palliate. The patient died shortly afterwards. | Yes     |
| xxx_14         | Patient was having a kidney biopsy and had a bleed as a result, so had been kept in hospital on xxxxx ward at xxx city campus.                                                                                                                                   | Yes     |
| xxx_23         | Patient admitted xx/xx/2016 with worsening disease and type 2 respiratory failure. Treated with non-invasive ventilation and intravenous antibiotics. deteriorated despite treatment and passed away xx/xx/2016                                                  | Yes     |
| xxx_17         | Rash reoccurred after re-trying oral antibiotic medication. Advised to stop again                                                                                                                                                                                | No      |
| xxx_17         | Patient on holiday. Telephoned to report rash on both legs after starting new oral antibiotics. Advised to discontinue                                                                                                                                           | No      |
| xxx_20         | Patient was admitted with influenza and CF. Exacerbation treated with iv antibiotics, discharged with home IV's. readmitted on the xx xxx with AKI (Acute Kidney Injury)<br>Assumed secondary to dehydration. Dornase stopped                                    | Yes     |

### Protocol non-compliances

In total, there were 9 protocol non compliances during the trial. 6 (67%) of these were follow up visits conducted outside of the calculated window (5 +/-1 month). 3 (33%) of these were participants ticking statements on the consent form rather than initialling. All of these protocol non compliances were assessed as minor non-compliances.

### Summary of missing data

Exacerbation data was collected for 6 months in 60/64 participants (94%). Adherence was collected for at least 6 months for 58/64 participants (90%).

The number of missing scores for questionnaires completed at baseline and 5 month follow up was very low (Table 25). Completion rate was 100% for the majority of baseline questionnaires and at least 89% for 5 month questionnaires. Missing scores were due to drop out (described in section 2.1). Such high completion rates are reassuring for the main trial.

Table 24: Summary of missing scores and items within questionnaires

|                | Time            | Total | %     | Intervention Median (min,max) | Control Median (min,max) | Overall Median (min,max) |
|----------------|-----------------|-------|-------|-------------------------------|--------------------------|--------------------------|
| <b>EQ5D-5L</b> | Baseline        | 64    | 100%  | 5 ( 5 , 5 )                   | 5 ( 5 , 5 )              | 5 ( 5 , 5 )              |
| <b>5 items</b> | 5 (+/-1) months | 58    | 90.6% | 5 ( 0 , 5 )                   | 5 ( 0 , 5 )              | 5 ( 0 , 5 )              |
| <b>PAM-13</b>  | Baseline        | 64    | 100%  | 13 ( 13 , 13 )                | 13 ( 13 , 13 )           | 13 ( 13 , 13 )           |
| <b>13 item</b> | 5 (+/-1) months | 59    | 92.2% | 13 ( 0 , 13 )                 | 13 ( 0 , 13 )            | 13 ( 0 , 13 )            |
| <b>CHAOS</b>   | Baseline        | 64    | 100%  | 4 ( 4 , 4 )                   | 4 ( 4 , 4 )              | 4 ( 4 , 4 )              |
| <b>4 items</b> | 5 (+/-1) months | 59    | 92.2% | 4 ( 0 , 4 )                   | 4 ( 0 , 4 )              | 4 ( 0 , 4 )              |
| <b>MAD-3</b>   | Baseline        | 62    | 96.9% | 3 ( 1 , 3 )                   | 3 ( 0 , 3 )              | 3 ( 0 , 3 )              |
| <b>3 items</b> | 5 (+/-1) months | 57    | 89.1% | 3 ( 0 , 3 )                   | 3 ( 0 , 3 )              | 3 ( 0 , 3 )              |
| <b>SRBAI</b>   | Baseline        | 63    | 98.4% | 4 ( 0 , 4 )                   | 4 ( 4 , 4 )              | 4 ( 0 , 4 )              |
| <b>4 items</b> | 5 (+/-1) months | 59    | 92.2% | 4 ( 0 , 4 )                   | 4 ( 0 , 4 )              | 4 ( 0 , 4 )              |
| <b>GAD-7</b>   | Baseline        | 64    | 100%  | 7 ( 7 , 7 )                   | 7 ( 7 , 7 )              | 7 ( 7 , 7 )              |
| <b>7 items</b> | 5 (+/-1) months | 59    | 92.2% | 7 ( 0 , 7 )                   | 7 ( 0 , 7 )              | 7 ( 0 , 7 )              |
| <b>PHQ-8</b>   | Baseline        | 64    | 100%  | 8 ( 8 , 8 )                   | 8 ( 8 , 8 )              | 8 ( 8 , 8 )              |
| <b>8 items</b> | 5 (+/-1) months | 59    | 92.2% | 8 ( 0 , 8 )                   | 8 ( 0 , 8 )              | 8 ( 0 , 8 )              |

**Recommendations for Main Trial/ Points for discussion**

- For the primary analysis in the main trial, we would recommend the use of the offset adjusted model as this will allow the use of more data and allows the inclusion of potentially important participants over a greater amount of time. For example, our original model excluded participants who died, however doing so means we have lost key information.
- This is a pilot study, not powered to detect an effect
- The nature of the data means that small changes appear to influence the result greatly

For peer review only

## Appendix

Description of the patient reported outcomes

| Name                 | Score range | Description                                                                                                                       | Interpretation of score                                                                   |
|----------------------|-------------|-----------------------------------------------------------------------------------------------------------------------------------|-------------------------------------------------------------------------------------------|
| <b>EQ-5D-5L</b>      | -0.224-1    | Measure of health status                                                                                                          | A score of zero means death, 1 is full health, negative score is a state worse than death |
| <b>PAM-13</b>        | 0-100       | Measures patient activation e.g. ability and willingness to manage their health. 13 items with scoring spreadsheet                | 0= low patient activation<br>100= high patient activation                                 |
| <b>CHAOS-6</b>       | 0-24        | Measures confusion, hubbub and order. 6 item questionnaire                                                                        | 0= low level of chaos<br>24= high level of chaos                                          |
| <b>SRBAI</b>         | 0-28        | Measure of habit and automaticity 4 item, 7 point likert scale                                                                    | 0= low level of automaticity<br>28= high level of automaticity                            |
| <b>CFQ-R</b>         | 0-100       | 8 domains each score 0-100. The domains are:<br>Physical, Emotion, Social, Eating, Body, Treatment Burden, Respiratory, Digestion | 0= low<br>100= high                                                                       |
| <b>PHQ-8</b>         | 0-24        | Measure of depression. 8 item questionnaire, 0-3 for each item                                                                    | 0= No or minimal depression<br>24= Severe depression                                      |
| <b>GAD-7</b>         | 0-21        | Measure of anxiety. 7 item questionnaire                                                                                          | 0= No anxiety<br>21= Severe anxiety                                                       |
| <b>COM-BBQ</b>       |             |                                                                                                                                   |                                                                                           |
| Specific Necessities | 2-5         | Measure of perceived personal need for medication                                                                                 | Direction of effect would be an increase in score                                         |
| Specific Concerns    | 1-3         | Measure of perceived concerns about the negative effects of the medicine they are taking                                          | Direction of effect would be a decrease in score                                          |
| <b>MAD-3</b>         | 3-15        | Specifically made 3 item questionnaire to measure perceived medication adherence                                                  | 3= low<br>15= high                                                                        |

## Additional File 07. Changes to intervention procedures

| Change Number                   | Problem type         | Problem Identified                                                                                                                                                                                   | Solutions implemented in full-scale trial (hashed numbers - # - refer to logic model constructs)                                                                                                                                                       | Timing of change implementation |
|---------------------------------|----------------------|------------------------------------------------------------------------------------------------------------------------------------------------------------------------------------------------------|--------------------------------------------------------------------------------------------------------------------------------------------------------------------------------------------------------------------------------------------------------|---------------------------------|
| <b>CFHealthHub IT component</b> |                      |                                                                                                                                                                                                      |                                                                                                                                                                                                                                                        |                                 |
| 1                               | Real World and Trial | Interventionists having difficulty identifying videos (#22) appropriate for a patient's needs or interests.                                                                                          | Descriptions were provided with each video. The PPI group agreed with this change and assisted with writing descriptions for each video.                                                                                                               | During the feasibility study    |
| 2                               | Real World and Trial | Adherence charts (#14, #20) were showing >100% adherence. This appeared to be more common in patients with alternating regimes, or taking medications <i>pro re nata</i> (PRN, meaning 'as needed'). | Prescription flow amended with the addition of PRN or alternating regime alerts, which will assist the data management team in highlighting any data discrepancies.                                                                                    | Post-feasibility study          |
| 3                               | Real World and Trial | Clinician functionality (amending prescriptions/ treatment targets (#3, #23) inaccessible through participant view (used in intervention sessions).                                                  | Participant view functionality implemented to facilitate intervention sessions. Clinicians are now able to run intervention sessions using CFHH through participant view but easily switch to clinician view to change prescriptions and to set goals. | Post-feasibility study          |



|                                |                      |                                                                                                                                                                                                                                                                                                           |                                                                                                                                                                                                                                                                                                                                |                        |
|--------------------------------|----------------------|-----------------------------------------------------------------------------------------------------------------------------------------------------------------------------------------------------------------------------------------------------------------------------------------------------------|--------------------------------------------------------------------------------------------------------------------------------------------------------------------------------------------------------------------------------------------------------------------------------------------------------------------------------|------------------------|
| 4                              | Real World and Trial | The lead psychologist identified the need to determine which participants were receiving push notifications as this relates to dose and rewards for adherence.                                                                                                                                            | The option to export data about number of push notifications sent to participants from the app (#16).                                                                                                                                                                                                                          | Post-feasibility study |
| 5                              | Real World and Trial | Originally the normative adherence was used to come up with the percentage adherence. It was identified this did not always match what participants were actually prescribed and this made the graphs difficult to interpret. The capping of the weekly graph at 100% also made interpretation difficult. | To improve interpretability of adherence data (#14), percentages are now calculated against the actual treatments prescribed and graphs are not capped at 100% to aid any interpretation of graphs and trouble shooting.                                                                                                       | Post-feasibility study |
| <b>Other IT infrastructure</b> |                      |                                                                                                                                                                                                                                                                                                           |                                                                                                                                                                                                                                                                                                                                |                        |
| 6                              | Real World and Trial | Flatlines at the beginning of some participant adherence run charts were identified to relate to the date registered at the time the nebuliser (#4) is paired with the Qualcomm Hub (#5). Flatlines at the end of the feasibility study were also observed (#14, #35).                                    | To achieve quality assurance of adherence data (#4, #5, #14, #35), hardware is now paired at the factory. The full-scale trial has been monitoring for, and has not found, such instances. Flatlines at the end of run charts established as genuine through triangulation with self-report quantitative and qualitative data. | Post-feasibility study |

| Interventionist training and manual |                      |                                                                                                                                                                                                                     |                                                                                                                                                                                                                                                                                                         |                        |
|-------------------------------------|----------------------|---------------------------------------------------------------------------------------------------------------------------------------------------------------------------------------------------------------------|---------------------------------------------------------------------------------------------------------------------------------------------------------------------------------------------------------------------------------------------------------------------------------------------------------|------------------------|
| 7                                   | Real World and Trial | Training packages were initially developed for physiotherapists. This led to interventionist recruitment problems.                                                                                                  | The job specification and training was redeveloped to suit non-physiotherapists (#9, #12), to enable any member of the MDT to be trained up to deliver the intervention. A suitably qualified individual such as a postgraduate psychologist could be supported by the MDT to deliver the intervention. | Post-feasibility study |
| 8                                   | Real World and Trial | The interventionist job specification did not reflect the flexibility needed to carry out the interventionist role- e.g. flexibility in working patterns, skills in motivational interviewing and extensive travel. | The research team, with input from the interventionists, revised the job specification for the interventionist role based on experience of delivering the intervention in the pilot in order to better manage expectations of the role (#12).                                                           | Post-feasibility study |
| 9                                   | Real World and Trial | Pilot study interventionists felt that training was good but could be helped by introducing case studies with real world data, in CFHealthHub.                                                                      | Realistic case studies with data to support interventionist training / role plays for using website were developed to provide training more applicable to real CF patients (#9). This model is generally used in a healthcare training setting.                                                         | Post-feasibility study |
| 10                                  | Real World and Trial | Sporadic training over six weeks, whilst also conducting research procedures was                                                                                                                                    | Training was condensed into an intensive course over ten days, focusing solely on intervention delivery (#9).                                                                                                                                                                                           | Post-feasibility study |

|    |                      |                                                                                                                                                                                                                      |                                                                                                                                                                                                                                          |                        |
|----|----------------------|----------------------------------------------------------------------------------------------------------------------------------------------------------------------------------------------------------------------|------------------------------------------------------------------------------------------------------------------------------------------------------------------------------------------------------------------------------------------|------------------------|
|    |                      | overwhelming for interventionists.                                                                                                                                                                                   |                                                                                                                                                                                                                                          |                        |
| 11 | Real World and Trial | Assessment of intervention fidelity identified that some of the active ingredients of the intervention were absent e.g. negotiating goals and letting participants take ownership of choices.                        | The recruitment and training process was modified to incorporate role play at the interview; explaining fidelity assessment criteria during training and also on-going assessment to ensure that any issues are identified quickly (#9). | Post-feasibility study |
| 12 | Real World and Trial | The focus of interventionists during intervention delivery was not always on the aspects that evidence would indicate are the most active ingredients for example goal setting, action planning and coping planning. | Emphasis was placed on the main 'active ingredients' in the manual and in training (#8, #9).                                                                                                                                             | Post-feasibility study |
| 13 | Real World and Trial | During the course of the trial, it became apparent that participants were not being followed up and engaged in a manner to allow them to build a habit.                                                              | Focus on habit formation / revised logic model will be implemented by a 6-8 week period of habit formation sessions (#8).                                                                                                                | Post-feasibility study |
| 14 | Real World and Trial | It was identified that after some participants last review visit, their adherence to treatment dropped.                                                                                                              | For the full RCT, intervention visits are now triggered if the participant is having an exacerbation/IV, has a drop of 20% or more adherence in the last 4 weeks and if the participant requests additional support.                     | Post-feasibility study |

1  
2  
3  
4  
5  
6  
7  
8  
9  
10  
11  
12  
13  
14  
15  
16  
17  
18  
19  
20  
21  
22  
23  
24  
25  
26  
27  
28  
29  
30  
31  
32  
33  
34  
35  
36  
37  
38  
39  
40  
41  
42  
43  
44  
45  
46

|  |  |  |                                                    |  |
|--|--|--|----------------------------------------------------|--|
|  |  |  | These will be termed ‘intervention triggers’ (#8). |  |
|--|--|--|----------------------------------------------------|--|

For peer review only

**Good Reporting of A Mixed Methods Study (GRAMMS).**

O’Cathain A, Murphy E, Nicholl J. The quality of mixed methods studies in health services research. *J Health Serv Res Policy* 2008;13:92–8. doi:10.1258/jhsrp.2007.007074

Added to the EQUATOR Network database 26/09/2013.

**(1) Describe the justification for using a mixed methods approach to the research question.**

p5; lines 93-95.

**(2) Describe the design in terms of the purpose, priority and sequence of methods**

p11; line 240: we used a modified triangulation protocol; the study is described as nested, indicating, that the methods were used concurrently (p9; line 192).

**(3) Describe each method in terms of sampling, data collection and analysis**

Pages 9-12; 195-273.

**(4) Describe where integration has occurred, how it has occurred and who has participated in it**

Pages 11-12; Lines 240-273.

**(5) Describe any limitation of one method associated with the present of the other method**

Page 25; Lines 576-582.

**(6) Describe any insights gained from mixing or integrating methods**

p5; lines 93-95. p25; lines 573-611.

# BMJ Open

## Feasibility study for supporting medication adherence for adults with cystic fibrosis: mixed-methods process evaluation

|                                 |                                                                                                                                                                                                                                                                                                                                                                                                                                                                                                                                                                                                                                                                                                                                                                                                                                                                                                                                                                                                                                                                                                                                                                                                                                                                                                                                                                                                                                                                                                                                  |
|---------------------------------|----------------------------------------------------------------------------------------------------------------------------------------------------------------------------------------------------------------------------------------------------------------------------------------------------------------------------------------------------------------------------------------------------------------------------------------------------------------------------------------------------------------------------------------------------------------------------------------------------------------------------------------------------------------------------------------------------------------------------------------------------------------------------------------------------------------------------------------------------------------------------------------------------------------------------------------------------------------------------------------------------------------------------------------------------------------------------------------------------------------------------------------------------------------------------------------------------------------------------------------------------------------------------------------------------------------------------------------------------------------------------------------------------------------------------------------------------------------------------------------------------------------------------------|
| Journal:                        | <i>BMJ Open</i>                                                                                                                                                                                                                                                                                                                                                                                                                                                                                                                                                                                                                                                                                                                                                                                                                                                                                                                                                                                                                                                                                                                                                                                                                                                                                                                                                                                                                                                                                                                  |
| Manuscript ID                   | bmjopen-2020-039089.R1                                                                                                                                                                                                                                                                                                                                                                                                                                                                                                                                                                                                                                                                                                                                                                                                                                                                                                                                                                                                                                                                                                                                                                                                                                                                                                                                                                                                                                                                                                           |
| Article Type:                   | Original research                                                                                                                                                                                                                                                                                                                                                                                                                                                                                                                                                                                                                                                                                                                                                                                                                                                                                                                                                                                                                                                                                                                                                                                                                                                                                                                                                                                                                                                                                                                |
| Date Submitted by the Author:   | 27-Jul-2020                                                                                                                                                                                                                                                                                                                                                                                                                                                                                                                                                                                                                                                                                                                                                                                                                                                                                                                                                                                                                                                                                                                                                                                                                                                                                                                                                                                                                                                                                                                      |
| Complete List of Authors:       | Hind, Daniel; The University of Sheffield, SCHARR<br>Drabble, Sarah; The University of Sheffield, Medical Care Research Unit, School of Health and Related Research (SCHARR)<br>Arden, Madelynne; Sheffield Hallam University, Centre for Behavioural Science and Applied Psychology<br>Mandefield, Laura; University of York, Health Sciences<br>Waterhouse, Simon; The University of Sheffield, CTRU<br>Maguire, Chin; University of Sheffield,<br>Cantrill, Hannah; The University of Sheffield, CTRU<br>Robinson, Louisa; The University of Sheffield<br>Beever, Daniel; The University of Sheffield, CTRU<br>Scott, Alex; Sheffield University, School of Health and Related Research<br>Keating, Sam; The University of Sheffield<br>Hutchings, Marlene; Sheffield Teaching Hospitals NHS Foundation Trust<br>Bradley, Judy; Queen's University Belfast, School of Medicine, Dentistry and Biomedical Sciences<br>Nightingale, Julia ; University Hospital Southampton NHS Foundation Trust<br>Allenby, Mark; University Hospital Southampton NHS Foundation Trust<br>Dewar, Jane; Nottingham University Hospitals NHS Trust<br>Whelan, Pauline; The University of Manchester, Health e-Research Centre<br>Ainsworth, John; The University of Manchester, Division of Informatics, Imaging & Data Sciences<br>Walters, Stephen; University of Sheffield, SCHARR<br>Wildman, Martin; Sheffield Teaching Hospitals NHS Foundation Trust<br>O'Cathain, Alicia; University of Sheffield, School of Health and Related Research |
| <b>Primary Subject Heading</b>: | Respiratory medicine                                                                                                                                                                                                                                                                                                                                                                                                                                                                                                                                                                                                                                                                                                                                                                                                                                                                                                                                                                                                                                                                                                                                                                                                                                                                                                                                                                                                                                                                                                             |
| Secondary Subject Heading:      | Evidence based practice, Health informatics, Health services research, Patient-centred medicine, Qualitative research                                                                                                                                                                                                                                                                                                                                                                                                                                                                                                                                                                                                                                                                                                                                                                                                                                                                                                                                                                                                                                                                                                                                                                                                                                                                                                                                                                                                            |
| Keywords:                       | Cystic fibrosis < THORACIC MEDICINE, Health informatics < BIOTECHNOLOGY & BIOINFORMATICS, Clinical trials < THERAPEUTICS, STATISTICS & RESEARCH METHODS, SOCIAL MEDICINE, Quality in health care < HEALTH SERVICES ADMINISTRATION & MANAGEMENT                                                                                                                                                                                                                                                                                                                                                                                                                                                                                                                                                                                                                                                                                                                                                                                                                                                                                                                                                                                                                                                                                                                                                                                                                                                                                   |

1  
2  
3  
4  
5  
6  
7  
8  
9  
10  
11  
12  
13  
14  
15  
16  
17  
18  
19  
20  
21  
22  
23  
24  
25  
26  
27  
28  
29  
30  
31  
32  
33  
34  
35  
36  
37  
38  
39  
40  
41  
42  
43  
44  
45  
46  
47  
48  
49  
50  
51  
52  
53  
54  
55  
56  
57  
58  
59  
60

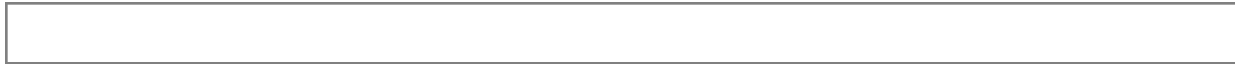

SCHOLARONE™  
Manuscripts



I, the Submitting Author has the right to grant and does grant on behalf of all authors of the Work (as defined in the below author licence), an exclusive licence and/or a non-exclusive licence for contributions from authors who are: i) UK Crown employees; ii) where BMJ has agreed a CC-BY licence shall apply, and/or iii) in accordance with the terms applicable for US Federal Government officers or employees acting as part of their official duties; on a worldwide, perpetual, irrevocable, royalty-free basis to BMJ Publishing Group Ltd ("BMJ") its licensees and where the relevant Journal is co-owned by BMJ to the co-owners of the Journal, to publish the Work in this journal and any other BMJ products and to exploit all rights, as set out in our [licence](#).

The Submitting Author accepts and understands that any supply made under these terms is made by BMJ to the Submitting Author unless you are acting as an employee on behalf of your employer or a postgraduate student of an affiliated institution which is paying any applicable article publishing charge ("APC") for Open Access articles. Where the Submitting Author wishes to make the Work available on an Open Access basis (and intends to pay the relevant APC), the terms of reuse of such Open Access shall be governed by a Creative Commons licence – details of these licences and which [Creative Commons](#) licence will apply to this Work are set out in our licence referred to above.

Other than as permitted in any relevant BMJ Author's Self Archiving Policies, I confirm this Work has not been accepted for publication elsewhere, is not being considered for publication elsewhere and does not duplicate material already published. I confirm all authors consent to publication of this Work and authorise the granting of this licence.



1  
2  
3  
4  
5  
6  
7  
8  
9  
10  
11  
12  
13  
14  
15  
16  
17  
18  
19  
20  
21  
22  
23  
24  
25  
26  
27  
28  
29  
30  
31  
32  
33  
34  
35  
36  
37  
38  
39  
40  
41  
42  
43  
44  
45  
46  
47  
48  
49  
50  
51  
52  
53  
54  
55  
56  
57  
58  
59  
60

# 1 Feasibility study for supporting medication adherence 2 for adults with cystic fibrosis: mixed-methods process 3 evaluation 4

5 Daniel Hind<sup>1§</sup>, Sarah J Drabble<sup>2</sup>, Madelynne A Arden<sup>3</sup>, Laura Mandefield<sup>4</sup>, Simon  
6 Waterhouse<sup>1</sup>, Chin Maguire<sup>1</sup>, Hannah Cantrill<sup>1</sup>, Louisa Robinson<sup>1</sup>, Daniel Beever<sup>1</sup>,  
7 Alex Scott<sup>1</sup>, Sam Keating<sup>1</sup>, Marlene Hutchings<sup>5</sup>, Judy Bradley<sup>6</sup>, Julia Nightingale<sup>7</sup>,  
8 Mark I Allenby<sup>7</sup>, Jane Dewar<sup>8</sup>, Pauline Whelan<sup>9</sup>, John Ainsworth<sup>9</sup>, Stephen J  
9 Walters<sup>2</sup>, Martin J Wildman<sup>2,5</sup>, Alicia O’Cathain<sup>2</sup>.

10  
11 <sup>1</sup>Clinical Trials Research Unit, University of Sheffield, Regent Court, 30 Regent  
12 Street, Sheffield, S1 4DA, UK

13 <sup>2</sup>School of Health and Related Research, Regent Court, 30 Regent Street, Sheffield,  
14 S1 4DA, UK

15 <sup>3</sup>Centre for Behavioural Science and Applied Psychology, Sheffield Hallam  
16 University, Collegiate Crescent, Sheffield, S10 2BQ

17 <sup>4</sup> Department of Health Sciences, University of York, University of York, Seebohm  
18 Rowntree Building, Heslington, York, YO10 5DD

19 <sup>5</sup> Sheffield Adult Cystic Fibrosis Unit Sheffield Teaching Hospitals NHS Foundation  
20 Trust, Northern General Hospital, Herries Road, Sheffield, S5 7AU

21 <sup>6</sup> Wellcome-Wolfson Institute For Experimental Medicine, School of Medicine,  
22 Dentistry and Biomedical Sciences, Queen’s University Belfast, UK..

23 <sup>7</sup> Wessex Adult Cystic Fibrosis Service, University Hospital Southampton NHS  
24 Foundation Trust, Tremona Road, Southampton, Hampshire, SO16 6YD.

25 <sup>8</sup> Wolfson Cystic Fibrosis Centre, Nottingham University Hospitals NHS Trust, City  
26 Hospital, Hucknall Road, Nottingham, NG5 1PB.

1  
2  
3 27 <sup>9</sup> Health eResearch Centre - Division of Imaging, Informatics and Data Sciences,  
4  
5 28 School of Health Sciences, Faculty of Biology, Medicine and Health, The University  
6  
7 29 of Manchester, Manchester Academic Health Science Centre, Manchester, United  
8  
9  
10 30 Kingdom

11  
12 31 <sup>§</sup> Corresponding author: Daniel Hind, Clinical Trials Research Unit, University of  
13  
14 32 Sheffield, Regent Court, 30 Regent Street, Sheffield, S1 4DA, UK.

15  
16  
17 33 d.hind@sheffield.ac.uk

18  
19 34

20  
21 35 Email addresses:

22  
23  
24 36 DH: d.hind@sheffield.ac.uk

25  
26 37 SD: s.j.drabble@sheffield.ac.uk

27  
28 38 Madelynne A: M.Arden@shu.ac.uk

29  
30 39 LM: l.mandefield@sheffield.ac.uk

31  
32 40 SW: s.waterhouse@sheffield.ac.uk

33  
34 41 CM: c.maguire@sheffield.ac.uk

35  
36 42 HC: h.cantrill@sheffield.ac.uk

37  
38 43 LR: louisa.robinson@sheffield.ac.uk

39  
40 44 DB: d.a.beever@sheffield.ac.uk

41  
42 45 AS: alex.scott@sheffield.ac.uk

43  
44 46 SK: s.m.keating@sheffield.ac.uk

45  
46 47 MH: marlene.hutchings@sth.nhs.uk

47  
48 48 JB: judy.bradley@qub.ac.uk

49  
50 49 JN: julia.nightingale@uhs.nhs.uk

51  
52 50 Mark A: mark.allenby@uhs.nhs.uk

53  
54 51 JD: jane.dewar@nuh.nhs.uk

55  
56  
57  
58  
59  
60

1  
2  
3  
4  
5  
6  
7  
8  
9  
10  
11  
12  
13  
14  
15  
16  
17  
18  
19  
20  
21  
22  
23  
24  
25  
26  
27  
28  
29  
30  
31  
32  
33  
34  
35  
36  
37  
38  
39  
40  
41  
42  
43  
44  
45  
46  
47  
48  
49  
50  
51  
52  
53  
54  
55  
56  
57  
58  
59  
60

52 PW: pauline.whelan@manchester.ac.uk  
53 JA: John.Ainsworth@manchester.ac.uk  
54 SJW: s.j.walters@sheffield.ac.uk  
55 AOC: a.ocathain@sheffield.ac.uk  
56 MW: martin.wildman@sth.nhs.uk

For peer review only

## 58 **Abstract**

### 59 **Objectives**

60 To undertake a process evaluation of an adherence support intervention for people  
61 with cystic fibrosis (PWCF), to assess its feasibility and acceptability.

### 63 **Setting**

64 Two UK Cystic Fibrosis (CF) units

### 66 **Participants**

67 Fourteen adult PWCF; 3 professionals delivering adherence support  
68 ('interventionists'); 5 multi-disciplinary CF team members.

### 70 **Interventions**

71 Nebuliser with data recording and transfer capability, linked to a software platform,  
72 and strategies to support adherence to nebulised treatments facilitated by  
73 interventionists over five months (+/- one month).

### 75 **Primary and secondary measures**

76 Feasibility and acceptability of the intervention, assessed through semi-structured  
77 interviews, questionnaires, fidelity assessments, click analytics.

### 79 **Results**

80 Interventionists were complimentary about the intervention and training. Key barriers  
81 to intervention feasibility and acceptability were identified. Interventionists had  
82 difficulty finding clinic space and time in normal working hours to conduct review

1  
2  
3 83 visits. As a result, fewer than expected intervention visits were conducted and  
4  
5 84 interviews indicated this may explain low adherence in some intervention arm  
6  
7  
8 85 participants. Adherence levels appeared to be >100% for some patients, due to  
9  
10 86 inaccurate prescription data, particularly in patients with complex treatment regimens.  
11  
12 87 Flatlines in adherence data at the start of the study were linked to device connectivity  
13  
14 88 problems. Content and delivery quality fidelity were 100% and 60-92% respectively,  
15  
16  
17 89 indicating that interventionists needed to focus more on intervention ‘active  
18  
19 90 ingredients’ during sessions.  
20  
21  
22 91

## 92 **Conclusions**

93 The process evaluation led to 14 key changes to intervention procedures to overcome  
94 barriers to intervention success. With the identified changes, it is feasible and  
95 acceptable to support medication adherence with this intervention.  
96

97 Registration: ISRCTN13076797; 7<sup>th</sup> June 2016.  
98  
99

## 100 **Strengths and limitations of this study**

- 101 • This is a detailed evaluation of the feasibility of an adherence support system  
102 for people with cystic fibrosis.
- 103 • The use of mixed methods provided indepth understanding of the processes  
104 involved in delivering the service, its value, and factors that might influence  
105 its use, implementation and success.
- 106 • This was a small, two-centre study.

## 107 **Background**

108

109 Cystic Fibrosis (CF) is a life-threatening, inherited condition affecting over 90,000  
110 people worldwide, primarily of Northern European ancestry[1]. Median survival for  
111 people with CF (PWCF) is estimated at 31 years [2–6] with progressive lung function  
112 decline, caused by regular infection and damage to airways, being one of the main  
113 disease features [2].

114

115 Preventative medications preserve lung function and reduce exacerbations [7–  
116 13]. Low adherence to these medications is problematic as this predicts exacerbations  
117 requiring intravenous antibiotics (IVAB)[14,15]. Exacerbations of this nature carry a  
118 risk of systemic side effects of both increased mortality[16,17], and cost of care [18–  
119 20]. In 2012, the total spend on CF in the UK was estimated to be £100 million, with  
120 £30 million spent on inhaled antibiotics and mucolytics[21]; the UK CF population  
121 received 171,907 days of IVAB with 93,455 days received in hospital, costing an  
122 estimated £27 million[22].

123

124 Self-reported adherence to inhaled therapies underestimates objectively-measured  
125 adherence, with rates of 80% and 36% recorded, respectively[23] and systematic data  
126 collection suggests objective adherence to be closer to 30%[24]. As a result, clinicians  
127 are currently unable to identify PWCF with low adherence, in order to provide  
128 additional support. Hitherto, the most objective surrogate measure of adherence has  
129 been the medicines possession ratio (MPR). However, based on the experience of a  
130 CF service in Leeds UK, MPR rates of 63%[25] considerably over-estimate adherence  
131 compared with nebuliser download data of 36%[26].

132

1  
2  
3 133 Treatment burden has long been recognised as a key barrier to medication adherence  
4  
5 134 in CF[27], and reducing treatment burden is a key research priority for PWCF and  
6  
7  
8 135 clinicians, identified by the Cystic Fibrosis Foundation and the James Lind  
9  
10 136 Alliance[28,29]. In response, a complex intervention was developed to support  
11  
12 137 inhaled medication adherence in PWCF[30]. This article presents the results of a  
13  
14 138 process evaluation that was undertaken alongside a pilot RCT, the objectives of which  
15  
16 139 were to determine the feasibility of a full-scale RCT[30]. Here, we describe the  
17  
18 140 resultant changes made to intervention procedures prior to that full-scale RCT[31].  
19  
20  
21 141 The specific objectives of the process evaluation were:

- 22  
23  
24 142
- 25  
26 143 1. To triangulate qualitative and quantitative data collected on intervention  
27  
28 144 inputs, engagement, activities, and contextual factors, alongside immediate and  
29  
30 145 intermediate outcomes recorded in the feasibility study, to understand and identify  
31  
32 146 potential barriers to intervention implementation and success.
  - 33  
34 147 2. To document and use these findings to guide changes to intervention  
35  
36 148 procedures, ahead of a future, full-scale RCT.
- 37  
38  
39  
40

## 41 149 **Methods**

### 42 150 ***The wider feasibility study***

43 151 The process evaluation forms one part of a wider pilot study, which also assessed the  
44  
45  
46 152 feasibility of RCT procedures and mechanisms of action (reported elsewhere[30,32]).  
47  
48 153 The pilot RCT consisted of 33 intervention patients and 31 control patients. Three  
49  
50 154 trained interventionists in two UK CF centres delivered the intervention to PWCF in  
51  
52 155 the intervention arm and followed them up for 5 months, plus or minus one month.

### 53 156 ***Intervention description***

54  
55 157 The complex intervention to support adherence in CF was developed to enable PWCF  
56  
57  
58 158 to manage adherence to nebulised medication, with a view to shifting CF treatment  
59  
60

1  
2  
3 159 from rescue in hospital settings to prevention, managed in the community. The full  
4  
5 160 intervention development process is described in a separate article[30].  
6  
7  
8 161

9  
10 162 The complex intervention consists of four key elements: the eTrack, CFHealthHub  
11  
12 163 server, the CFHealthHub Apps and the manualised behavioural intervention. A logic  
13  
14 164 model (Figure 1) was produced to reflect, in detail, constructs and processes by which  
15  
16 165 the intervention was expected to function; this is in terms of inputs, engagement,  
17  
18 166 activities, and outcomes. The logic model's hashed numbers (#1, #2, etc) provide a  
19  
20 167 reference for linking intervention materials and processes to logic model constructs in  
21  
22 168 Figure 1.  
23  
24  
25  
26 169

27  
28 170 The eTrack (#4) (PARI Pharma GmbH, Starnberg, Germany) is a microchipped  
29  
30 171 nebuliser, enabling real-time monitoring of adherence to nebulised medications.  
31  
32 172 Timestamped records of medications administered via the eTrack are sent to a 2net  
33  
34 173 Hub (Qualcomm, San Diego, USA; #5) which transmits data to PARI.  
35  
36 174

37  
38  
39  
40 175 Real-time inhalation data is received by the CFHealthHub (CFHH) server  
41  
42 176 infrastructure, stored securely and used for display in both a web-based interface and  
43  
44 177 a mobile app (#6, see Figure 2). Each of these displays adherence data alongside  
45  
46 178 tools to support behaviour change and educational content[33]. Educational modules  
47  
48 179 within CFHH include: 'What is Cystic Fibrosis?'; 'What does my IV treatment do?';  
49  
50 180 'I'm not convinced that my nebuliser treatment works'; 'What does my nebuliser  
51  
52 181 treatment do and why should I take it?'; 'Why is it important that I do my nebuliser  
53  
54 182 treatment every day?'; and, 'I have concerns about my nebuliser treatments'. The  
55  
56  
57  
58  
59  
60



1  
2  
3 183 nebuliser medication information displayed to the user in these sections are tailored to  
4  
5 184 them based on a baseline assessment of motivation, so as not to overwhelm them.  
6  
7  
8 185  
9  
10 186 Participants and their interventionists had access to adherence displays for monitoring  
11  
12 187 (#13, #19, #20) and other CFHH content (#21- #26), such as education about  
13  
14 188 treatments (#21) and problem solving in the face of adherence barriers (#26).  
15  
16  
17 189 Interventionists would use CFHH to facilitate delivery of manualised behavioural  
18  
19 190 intervention sessions (#8, #17).  
20  
21  
22 191  
23  
24 192 Interventionists (n =3) included a clinical psychologist, a physiotherapist and a social  
25  
26 193 worker. They received specific training to deliver the manualised intervention  
27  
28 194 sessions (#9). Training was delivered over two days, in face-to-face workshops. This  
29  
30 195 was supplemented by online learning modules and a further four-week training  
31  
32 196 schedule. Interventionists were assessed with online theory tests and in a competency  
33  
34 197 assessment which examined intervention delivery within the first 5 sessions.  
35  
36  
37 198  
38  
39  
40 199 Sessions were delivered either face-to-face or remotely, on a one-to-one basis. All  
41  
42 200 intervention arm participants received an initial intervention visit and a minimum of  
43  
44 201 one additional review visit over the period of the study (#18). The content of sessions  
45  
46 202 varied by participant reported motivation; sessions for those with low motivation were  
47  
48 203 tailored to promote relationship / confidence building and to support the participant in  
49  
50 204 the exploration of relevant CFHealthHub educational and information material (#21,  
51  
52 205 #22). Relevant material could be added to the participant's personalised 'Toolkit'.  
53  
54  
55  
56 206 Sessions conducted with participants displaying higher motivation would also involve  
57  
58 207 supporting the participant to set personalised adherence goals (#23, #24), and to make  
59  
60

1  
2  
3 208 action plans (#25) and engage in problem-solving including making coping plans  
4  
5 209 where relevant (#26).  
6  
7  
8  
9

10 210

### 11 211 **Design**

12 212 A mixed-methods approach was used for the process evaluation. Although this  
13  
14 213 pragmatic case study[34,35] primarily works at the level of the programme, we also  
15  
16 214 present a nested multiple-case design, with cases at the level of the PWCF, and two  
17  
18 215 embedded units of analysis – interviews with intervention participants and trial data.  
19

20 216

### 21 217 **Data Sources**

22 218 Quantitative and qualitative data sources were triangulated to address process  
23  
24 219 evaluation objectives. These are described using hashed numbers to relate data  
25  
26 220 sources to aspects of the logic model (Figure1) for which they contributed data.  
27  
28  
29

30 221

31 222 Qualitative data included: verbal reports from project staff (#1, #2, #10, #16); semi-  
32  
33 223 structured interviews with interventionists and participants in the intervention and  
34  
35 224 control arms of the pilot RCT (#8, #9, #12, #13, #14, #15, #16, #17, #19, #20, #21);  
36  
37 225 minutes of meetings (#3); emails (#4), website development reports (#6); and fidelity  
38  
39 226 assessments (#17). Semi-structured interviews, conducted face-to-face, were digitally  
40  
41 227 audio-recorded and transcribed verbatim. The median length of interviews was 30  
42  
43 228 minutes (range 11 to 87) for PWCF, 86 minutes (63 to 102) for interventionists and 62  
44  
45 229 minutes (51 to 66) for CF team members.  
46  
47  
48  
49

50 230

51 231

52 232 Quantitative data included: implementation log entries and data management reports  
53  
54 233 (#3), questionnaire data derived from secondary clinical outcome measures described  
55  
56  
57  
58  
59  
60

1  
2  
3 234 in Table 1 (#7, #28, #29, #30, #31, #32, #33) an interventionist-completed structured  
4  
5 235 questionnaire on interventionist confidence post-training (#9), structured  
6  
7 236 interventionist fidelity assessments in which audio-recordings of intervention sessions  
8  
9  
10 237 were coded using a fidelity scoring system which assessed whether each component  
11  
12 238 of the intervention was delivered and the quality of that delivery (#11, #17), CFHH  
13  
14 239 click analytics (#13, #14, #15, #18, #20, #21, #22, #23, #24, #25, #26), session  
15  
16  
17 240 frequency and duration records (#15); and adherence data taken from CFHH (#35).  
18  
19 241 Quantitative or descriptive data was collected for the 23 logic model constructs listed  
20  
21 242 in this paragraph as part of the trial protocol, as described in Table 1.  
22  
23  
24 243

### 244 **Sampling**

245 Participants were recruited for semi-structured interviews. Participants included  
26  
27  
28 246 intervention arm participants (n=14), interventionists (n=3, 0.8 WTE at each centre)  
29  
30  
31 247 and members of the wider, multi-disciplinary CF team (n=5). Participants were  
32  
33  
34 248 purposively sampled based on site, age, gender, deprivation index, objective and  
35  
36  
37 249 subjective adherence levels (service-users), or site and professional category  
38  
39 250 (professionals). Interventionists were interviewed twice – at the beginning and end of  
40  
41 251 the study – patients once. PWCF who consented to be approached for interview were  
42  
43 252 contacted by letter or email and, subsequently, telephone or email depending on  
44  
45  
46 253 preference. Professionals were contacted directly by the study team.  
47  
48 254

### 256 **Data Analysis**

257 We conducted a Framework analysis of interview transcripts[36], within NVivo (QSR  
258 International) using multiple frameworks including the Theoretical Domains  
259 Framework[37], a process evaluation framework[38], and the logic model (Figure 1).  
260

1  
2  
3 260  
4  
5 261 Using a modified triangulation protocol[39], we integrated qualitative and quantitative  
6  
7 262 datasets at the programme- and the case-level[40]. We used a joint display table[41]  
8  
9 263 to summarise data sets for 35 logic model constructs in the Inputs (n=12),  
10  
11 264 Engagement (n=6), Activities (n=7), Immediate outcomes (n=6) and Intermediate  
12  
13 265 outcomes (n=2) columns (Figure 1). The fit of data integration was categorised as:  
14  
15 266 ‘confirmation’ (quantitative and qualitative data provided similar findings);  
16  
17 267 ‘expansion’ (the datasets addressed different or complementary aspects of the  
18  
19 268 phenomenon); or, ‘discordance’ (the datasets were contradictory)[42]. We described  
20  
21 269 similar and unique contributions , made by the two data sets, to the research question  
22  
23 270 [39].  
24  
25  
26  
27  
28  
29

30 271  
31 272 In the 14 intervention participants, for whom both qualitative and quantitative process  
32  
33 273 data was available, we produced case-profiles[43], triangulating qualitative data with  
34  
35 274 individual-participant adherence run charts[44] (Additional File 01) and other  
36  
37 275 quantitative process data (see Additional File 02 – Study protocol, pp29-31). We  
38  
39 276 worked abductively, moving between behaviour change theories[45,46] and  
40  
41 277 contextual observations, agreeing plausible hypotheses to explain patterns which  
42  
43 278 could be tested in future work [47–50].  
44  
45  
46  
47  
48

49 280 We produced a case-ordered descriptive matrix[51], with cases ranked by average  
50  
51 281 adherence during the last month of the study, to understand how processes and  
52  
53 282 outcomes were mediated by local and individual conditions. Adherence levels of  
54  
55 283 >80% were assessed as high; 50-80% moderate; <50% low [14,52]. We theorised that  
56  
57 284 high life chaos, as measured by the Confusion, Hubbub and Order Scale  
58  
59  
60

1  
2  
3 285 (CHAOS)[53] and low motivation would be associated with low adherence. We used  
4  
5 286 four measures to understand motivation: (1) a single item, scored on a 1-7 Likert scale  
6  
7 287 – “I want to do all of my nebuliser treatment” (motivation); (2) a single item, scored  
8  
9 288 on a 1-7 Likert scale, which asked, “I am confident I can do all of my nebuliser  
10  
11 289 treatments” (‘confidence’); (3) the necessities and, (4) concerns five-point subscales  
12  
13 290 of the Beliefs about Medicines Questionnaire nebuliser-specific (BMQ) instrument  
14  
15 291 [54]. Interventionists assessed the participant’s motivation to increase adherence on a  
16  
17 292 one to seven scale after discussion with the patient; adequate motivation was  
18  
19 293 necessary before participants could make action plans and do problem solving  
20  
21 294 activities.  
22  
23  
24  
25  
26  
27  
28

### 296 ***Approach taken to modifying the intervention***

297 Modifications to the intervention fell into three categories: the software platform;  
30  
31  
32 298 other Information Technology (IT) infrastructure; and the manual and training.  
33  
34 299 Identified problems and solutions were tabulated following a modified approach of  
35  
36 300 that taken by Bugge [31]. Digital platform development was reviewed regularly using  
37  
38 301 the “Must have, Should have, Could have, and Won't have but would like”  
39  
40 302 (MoSCoW)[55], often used in agile software development [56,57].  
41  
42  
43  
44

### 304 ***Patient and Public Involvement***

305 Recruitment for the Patient and Public Involvement (PPI) Group was achieved by  
46  
47  
48 306 advertising within CF units and on the People in Research website, as well as via  
49  
50 307 group members themselves. Cross-infection between PWCF[58] was prevented by  
51  
52 308 arranging meetings via teleconference. The PPI group gave feedback on intervention  
53  
54 309 data-sharing policies, usability and presentation of the website/user-guide. In addition,  
55  
56  
57  
58  
59  
60

1  
2  
3 310 the PPI group piloted the participant information materials and one individual gave  
4  
5 311 feedback on the trial protocol and interview guides (Additional File 02).  
6  
7  
8 312

9  
10 313 ***Ethical approval***

11 314 The study received approval from London Brent Research Ethics Committee  
12  
13 315 (16/LO/0356). The funder was not involved in the trial design, patient recruitment,  
14  
15 316 data collection, analysis, interpretation, or presentation, writing or editing of the  
16  
17 317 report, or the decision to submit for publication. The corresponding author had full  
18  
19 318 access to all the data in the study and had final responsibility for the decision to  
20  
21 319 submit for publication.  
22  
23  
24  
25 320

26  
27  
28 321 **Results**

29 322 In what follows, we address contextual factors that affected implementation and  
30  
31 323 participant responses, then follow the columns (inputs, engagement, activities,  
32  
33 324 immediate and intermediate outcomes) of the logic model. Additional File 03 (Tables  
34  
35 325 A-G) summarises quantitative process outcomes for 14 case study participants, ranked  
36  
37 326 by objective adherence at the end of the trial. Hashed numbers (#1, #2, etc) indicate  
38  
39 327 cross references to the logic model (Figure 1) and supporting evidence in Additional  
40  
41 328 File 04, which summarises data triangulation at the level of individual logic model  
42  
43 329 constructs. Both qualitative and quantitative data were available for 13/34 logic model  
44  
45 330 constructs, providing confirmation of (n=2) or expansion on (n=11) inferences drawn  
46  
47 331 from quantitative data. A case-ordered descriptive matrix based on logic model  
48  
49 332 columns (Additional File 05) and run charts annotated with key events (Additional  
50  
51 333 File 01) provides an integrated analysis at the level of the participant for fourteen  
52  
53 334 'case studies', cross referenced by participant numbers (R02/52, R01/54, etc).  
54  
55  
56  
57  
58  
59  
60 335

1  
2  
3 336 **Contextual factors affecting implementation and participant**  
4 337 **responses**

5  
6 338 The key factor affecting implementation was the mixed economy of CF drug delivery  
7  
8 339 systems: the e-Flow (PARI Pharma GmbH, Starnberg, Germany); the iNeb (Philips  
9  
10 340 Healthcare, Eindhoven, Netherlands); and a number of dry powder delivery systems.  
11  
12 341 The e-Flow is the only device able to deliver all the wet nebulised drugs that are used  
13  
14 342 in CF care. The e-Track we used in this trial was a version of the e-Flow developed to  
15  
16 343 transfer time- and date-stamped data. Most patients at site R01 used e-Flows;  
17  
18 344 switching consenting participants over to the e-Track was generally unproblematic.  
19  
20 345 The e-Flow's competitor, the iNeb, cannot deliver aztreonam and requires double  
21  
22 346 chamber filling to deliver tobramycin, so it is not suitable for all patients. The data  
23  
24 347 transfer version of the iNeb, the BiNeb, is a prototype for which limited numbers are  
25  
26 348 available. We were unable to secure approval to integrate the BiNeb into CFHH in  
27  
28 349 time to incorporate it into this study. At site R02 where iNeb were commonly used,  
29  
30 350 those who were familiar with and liked the iNeb were less keen to swap to an  
31  
32 351 alternative device; some who swapped to the e-Track, later wanted to move back to  
33  
34 352 the iNeb. A minority of patients use dry powder delivery systems, none of which have  
35  
36 353 data transfer versions. We were unsuccessful in engaging any of the companies  
37  
38 354 producing dry powders in time to get dry powder systems integrated into CFHH,  
39  
40 355 meaning that dry powder users could not be recruited to this feasibility study. Making  
41  
42 356 nebulisers with data recording and transfer capability available within hospitals  
43  
44 357 following local delivery took prolonged engagement with medical engineering  
45  
46 358 departments to obtain local safety approvals. For more than one participant, the  
47  
48 359 strength of their mobile data signal affected 2net Hub connectivity with the central  
49  
50 360 server (Implementation log, 19 Oct 16).  
51  
52  
53  
54  
55  
56  
57  
58  
59 361  
60

1  
2  
3 362 Through meetings with site staff, the team identified a range of human factors that  
4  
5 363 also affected implementation, in particular: the availability of out-patient rooms; the  
6  
7 364 need to clean rooms after each consultation for cross-infection control purposes; and,  
8  
9 365 the expectation that, during hospital visits, outpatients will see the whole each  
10  
11 366 member of the multidisciplinary team separately. The struggle for clinic space and  
12  
13 367 patient convenience resulted in more home visits than anticipated for consent and  
14  
15 368 review meetings, informed by local lone-working policies. Reorganisation of one CF  
16  
17 369 Centre, involving the transfer of patients from the care of one local hospital to  
18  
19 370 another, had created discontent among some patients involved in the trial.  
20  
21  
22  
23  
24  
25  
26  
27  
28  
29

### 373 **Inputs**

374 The study chief investigator reported introducing local site investigators, centre  
375 directors and Multi-Disciplinary Teams (MDTs) to CFHH (#1). Through case reports,  
376 he conveyed that relying on FEV<sub>1</sub>, symptoms and BMI for CF management alone is  
377 inadequate and that objective adherence data could help overcome the ‘lamppost  
378 syndrome’[59], also known as the ‘streetlight effect’[60,61] or ‘drunkard’s  
379 search’(page 11[62]) – a type of availability bias[63]. The chief investigator reported  
380 feeling that site investigators at both centres were fully bought in, but that one  
381 clinician (not an investigator) believed that the disparities between subjective and  
382 objective adherence[23] were overstated (#2).

383  
384 Interventionists entered prescription data into CFHH based on patient records and  
385 self-reported treatment regimen (#3). Occasionally, interventionists were slow to  
386 make monthly prescription checks when prompted by system alerts, resulting in



1  
2  
3 387 apparent adherence levels of over 100%, traced to the use of alternating treatment  
4  
5 388 regimens[64] (Implementation Log, 01 Dec 16, TMG minutes 10 Jan 17). Nebulisers  
6  
7 389 with data recording and transfer capability (#4), 2net Hubs (#5), the CFHH website  
8  
9 390 and mobile application (#6), were made available (emails to project manager 20 May  
10  
11 391 16, 23 Jun 16). The Capability Opportunity Motivation -Beliefs about Medicines  
12  
13 392 Questionnaire (COM-BMQ – see Additional File 02)[54] questionnaire data (#7) was  
14  
15 393 collected in CFHH (Additional File 06, Tables 1-22, Figures 1-9).  
16  
17 394  
18  
19 395 Interventionists were complimentary about the intervention manual (#8) and highly  
20  
21 396 satisfied with training, but suggested that future courses involved a case study  
22  
23 397 approach, following a patient through the intervention to illustrate its different aspects  
24  
25 398 (#9) (Additional File 04). A member of the research team (MH) acted as an  
26  
27 399 intervention mentor to interventionists (#10). Interviews (SD) and observations (MH,  
28  
29 400 HC) identified differences in the way site investigators interacted with  
30  
31 401 interventionists, with one giving more intensive practical support, through weekly  
32  
33 402 meetings and problem-solving (not prescribed by the intervention), than the other.  
34  
35 403 Fidelity data was collected on all three interventionists and the fidelity assessment  
36  
37 404 instrument was modified before use in the full RCT (#11). During interviews,  
38  
39 405 interventionists were enthusiastic about intervention processes (#12). As sites  
40  
41 406 struggled to find space or time for consent / intervention encounters in clinic, the  
42  
43 407 study team requested an increase in the number of home visits (Implementation log 19  
44  
45 408 Oct 2016). As a result of initial problems in contacting participants and the need for  
46  
47 409 flexibility in arranging meetings out of usual clinic hours, the study team requested  
48  
49 410 flexible working in which the team worked 12:00-20:00 two days a week (interviews  
50  
51 & TMG minutes 29 Nov 2016).  
52  
53  
54  
55  
56  
57  
58  
59  
60

1  
2  
3 412  
4  
5  
6

7 413 **Engagement**

8 414 Interviews and click analytics showed that MDT members did not access adherence  
9  
10 415 data (#13), aside from in the form of bar charts brought to MDT meetings by  
11  
12 416 interventionists. It is important to note that extending the use of CFHH to the MDT  
13  
14 417 was not an objective of the trial and no training was given in this regard. Click  
15  
16 418 analytics showed that interventionists tracked adherence (#14). Of 14 case study  
17  
18 419 participants, three did not contribute complete adherence data: R02/42 and R02/02  
19  
20 420 withdrew, while R02/03 was lost to follow-up. In other participants, flatlines in  
21  
22 421 adherence data caused concern (Additional File 01). Flatlines at the beginning of the  
23  
24 422 study (e.g. R01/39, R01/48) indicated technical problems with pairing nebulisers and  
25  
26 423 hubs. Flatlines at the end of the study period (e.g. R01/42, R01/44, R02/12) were  
27  
28 424 confirmed as the genuine recording of non-adherence through the use of adherence  
29  
30 425 data beyond the end of the study period, interview data, self-report subjective  
31  
32 426 adherence and the MAD-3 (Additional File 03 – Table f).  
33  
34  
35  
36  
37

38 427

39  
40 428 Click analytics showed the median number of participant CFHH sessions was three  
41  
42 429 (#15) (Additional File 03 – Table c). Of those with low usage, initial technical  
43  
44 430 problems (R01/02, R01/48) and initial lack of availability of a mobile application (#6)  
45  
46 431 were potential contributing factors. Some case study participants showed moderate  
47  
48 432 (R02/52, R01/54 and R01/40: 9-13 sessions) or high use (R02/12 and R01/42: >40  
49  
50 433 sessions). Push notifications - user-defined messages from the server which give  
51  
52 434 participants congratulations or reminders about adherence behaviour – were not  
53  
54 435 available in the pilot trial (#16).  
55  
56  
57  
58  
59  
60

436

1  
2  
3 437 Based on fidelity assessment of intervention session recordings, the *content* fidelity of  
4  
5 438 face-to-face interactions, was excellent (100%) – with all aspects delivered as per the  
6  
7 439 manual (#17). Delivery *quality* fidelity was more variable (60-92%). The generation  
8  
9 440 of goals and action plans was sometimes too directive rather than negotiated and  
10  
11 441 supportive. Interviews demonstrated that assessing the true level of motivation to  
12  
13 442 adhere to treatment was challenging; sometimes those with insufficient intrinsic  
14  
15 443 motivation (e.g. R01/48, R01/54 and R02/03) were assessed as having sufficient  
16  
17 444 motivation and inappropriately tasked with setting and reviewing goals, making  
18  
19 445 action plans and problem solving (see below #23-26). These individuals were variably  
20  
21 446 motivated by wanting to prove themselves to MDT members, who had doubted their  
22  
23 447 adherence (R01/49 and R01/54, Additional File 05), or by helping the research:  
24  
25  
26  
27  
28  
29  
30  
31  
32  
33  
34  
35  
36  
37  
38  
39  
40  
41  
42  
43  
44  
45  
46  
47  
48  
49  
50  
51  
52  
53  
54

449 *“I made that special effort ‘cause I was taking part in this trial... I didn’t see*  
450 *how it was going to make me better” (R01/48).*

451  
452 Interaction with these individuals should have been confined to relationship-building  
453 and trust-building. Fidelity assessment of recordings identified that, in interactions  
454 with the adequately motivated, the focus was not always on the most active  
455 ingredients – goal-setting, action planning (habit formation) and problem-  
456 solving/coping planning. Participant run charts (Additional File 01) revealed a  
457 disparity in whether and when review visits happened (#18).  
458

### 459 **Activities**

460 In interviews, CF team clinicians (as distinct from the interventionists) confirmed they  
461 were not monitoring adherence as part of usual care (#19). Participant R01/02

1  
2  
3 462 complained that the research focus on adherence was “*parallel rather than*  
4  
5 463 *integrated*” with mainstream clinical management. However, the intervention was  
6  
7 464 designed to be interventionist delivered allowing individual randomisation in a system  
8  
9 465 without contamination of controls rather than an intervention aimed at achieving  
10  
11 466 system change which would have required a cluster trial design. Participants’ clicks  
12  
13 467 (median 11) on the CFHH “How am I doing?” (run charts) page sometimes related to  
14  
15 468 a limited number of sessions. In interviews, one moderately frequent user (R01/54)  
16  
17 469 only accessed this page to check their data was uploading. Other moderate/frequent  
18  
19 470 users described this page as important for adherence self- monitoring (#20), even  
20  
21 471 when their grasp of their own adherence was poor (R01/49).  
22  
23  
24  
25  
26  
27

28 473 In interviews with participants, for tailored education about treatment (#21),  
29  
30 474 participants accessed particular education pages for specific issues, such as nebuliser  
31  
32 475 malfunction, which was viewed as, “more down to earth” than technical manuals. In  
33  
34 476 particular a video about the treatment action of Dornase alfa, was often praised, as a  
35  
36 477 means of educating others about CF; ‘Talking heads’ videos (in these videos people  
37  
38 478 with CF described strategies for successful nebuliser use) (#22) divided opinion: for  
39  
40 479 some, the opportunity for social comparison[65] provided relief and reassurance;  
41  
42 480 those who were less appreciative were those who found comparisons with people  
43  
44 481 healthier than themselves could make them feel as though they were not doing well  
45  
46 482 and comparisons with those less healthy could make them fearful of the future.  
47  
48  
49  
50

51 483  
52  
53 484 Other activities (#23 to #26 on the logic model) required participants to have adequate  
54  
55 485 levels of motivation. Interventionists classified all but one case study participant  
56  
57 486 (R01/44) as having adequate motivation (Additional File 03, Table b) and therefore  
58  
59  
60

1  
2  
3 487 eligible for further tailored intervention. But, as detailed above (see #17 in the  
4  
5 488 engagement section), this was sometimes based on inadequate discussion with the  
6  
7 489 participants. In interviews, participants generally reported setting goals (#23), but  
8  
9 490 fidelity assessment showed that goals were sometimes formulated by interventionists  
10  
11 491 rather than by participants (see #17). The mean number of review sessions (#24) over  
12  
13 492 five months was 1 (Additional File 03 – Table e); this was fewer than intended, likely  
14  
15 493 reflecting a failure of the study team to set appropriate expectations and a lack of time  
16  
17 494 created by the high pace of recruitment (problem log entries: 31-Jan-17; 13-Feb-17).  
18  
19 495 Two individuals (R01/39 and R01/40) received their first face-to-face session with an  
20  
21 496 interventionist over halfway through the study period (Additional File 01). CFHH  
22  
23 497 action plan (#25), problem solving and coping plan (#26) pages were accessed a  
24  
25 498 median of two, three and one times, respectively (Additional File 03 – Table e).  
26  
27 499 Interviews data suggests action / coping plans were completed during intervention  
28  
29 500 visits but not accessed by participants otherwise. In interviews, some participants said  
30  
31 501 they were reassured by the presence of, and sometimes reported insights from,  
32  
33 502 problem-solving modules, such as what to do when going on holiday. However, the  
34  
35 503 use of action plans was disliked by some participants who found writing down the  
36  
37 504 action plans like “*going back to school*”. This dislike at least partly reflected the  
38  
39 505 generation of action and coping plans by interventionists rather than by the  
40  
41 506 participants themselves (see #17).  
42  
43  
44  
45  
46  
47  
48  
49  
50  
51

507

### 508 **Immediate outcomes**

509 The pilot was not designed to disseminate the intervention across the centre and with  
510 minimal monitoring by professionals within the wider CF team (see #19) routine  
511 medical care was not informed by adherence (#27). Unsurprisingly, given the lower

1  
2  
3 512 than expected face-to-face contact (#18, #24), intervention arm group averages for  
4  
5 513 immediate (process) outcomes (#28-33) changed little over five months, with the  
6  
7 514 exception that there was a mean reduction of 1.84 (SD 3.44) barriers to adherence per  
8  
9 515 person (#33), which could be the outcome of problem solving and education about  
10  
11 516 treatment processes (Additional file 03 – Table f). Frequent use of CFHH and self-  
12  
13 517 monitoring in particular (see above, #20) did not necessarily mean that self-reported  
14  
15 518 subjective adherence and electronically-captured objective adherence were well  
16  
17 519 aligned (#28) (Additional file 03 – Tables f and g). A *post hoc* paired comparison of  
18  
19 520 subjective and objective adherence at 5 (+/-) months (Figure 3) suggests that higher  
20  
21 521 adherers were more uniformly accurate in their understanding of their own adherence,  
22  
23 522 whereas low adherers could be overly optimistic.  
24  
25  
26  
27  
28  
29  
30  
31

### 524 **Intermediate outcomes**

525 Item #34 of the logic model, treatment optimisation, is defined by NICE as, “a  
526 person-centred approach to safe and effective medicines use” to ensure best  
527 outcomes[66]. Treatment optimisation is a service-level objective, which was beyond  
528 the scope of our patient-focused intervention but is the subject of related ongoing  
529 research (see Discussion). During interviews, RCT participants in the intervention  
530 arm described behaviours that would affect treatment optimisation, for instance taking  
531 holidays from their treatment. Levels of CF treatment adherence (#35) were 10%  
532 (95% CI: -5.2 to 25.2) higher in the intervention arm (Additional File 06). We  
533 developed a number of theories about why some intervention patients did or did not  
534 increase their adherence (#35) during the analysis. In some cases the run charts  
535 illustrated, in line with Control Theory, the goal-directed nature of behaviour and how  
536 it is regulated by feedback control processes[67]. For example, R01/39 and R01/49

1  
2  
3 537 seemed to show improvement shortly before planned face-to-face visits from  
4  
5 538 interventionists (Additional File 01). R01/39, who seemed intrinsically motivated  
6  
7 539 when interviewed, sustained improvement in adherence beyond the trial period  
8  
9  
10 540 through what they described as positive interaction with the interventionist. Others,  
11  
12 541 who seemed more extrinsically motivated in interviews (R01/49, R01/54, R01/48: see  
13  
14 542 #17), did not sustain adherence, with charts suggesting an effortful, ‘all-or-nothing’  
15  
16 543 pattern. At baseline, R02/07 had no well-established routine (CHAOS score of 10:  
17  
18 544 Additional File 01), implying substantial self-regulatory effort to achieve higher  
19  
20 545 adherence. In their interview, this participant reported finding habit formation parts,  
21  
22 546 such as goal-setting, helpful which may have enabled him to maintain high adherence  
23  
24 547 with reduced effort, as measured by increased habit and reduced life chaos and  
25  
26 548 barriers (change scores -5 and -3 respectively: Additional File 03 - Table f). Finally, it  
27  
28 549 is important to understand that individual-level adherence can be unstable over time  
29  
30 550 (Additional File 01, see especially, R01/54, R01/48) highlighting the problem of  
31  
32 551 assessing adherence as a ‘snapshot’ in a pre-/post-test analysis, rather than in a  
33  
34 552 continuous assessment over time.  
35  
36  
37  
38  
39  
40 553  
41  
42 554 Several participants with low baseline adherence appeared to have responded well to  
43  
44 555 the intervention. R01/40 had high motivation (Additional File 03 – Table b;  
45  
46 556 Additional File 01), possibly due to the salience of a recent hospitalisation for IVAB  
47  
48 557 treatment of an exacerbation. Click analytic data showed high engagement, with  
49  
50 558 independent access of the website and use of problem-solving tools. However in other  
51  
52 559 patients, case study run charts (Additional File 01) showed that measuring change in  
53  
54 560 average objective adherence between baseline and five months sometimes masked  
55  
56 561 periods of success in between (e.g. R01/02, and R02/12). Without looking at  
57  
58  
59  
60



1  
2  
3 562 adherence graphs, and only measuring objective adherence at baseline and five  
4  
5 563 months, this would have been missed (see Discussion). Interview data offered some  
6  
7 564 reasons for improved adherence. While R01/49 had not made an action plan and their  
8  
9 565 subjective adherence was optimistic (Additional file 03 – Table f), their objective  
10  
11 566 adherence increased from low to moderate over the trial period (Additional File 01);  
12  
13 567 their motivation also increased and self-reported barriers decreased (Additional file 03  
14  
15 568 – Table f), potentially through their high use of problem-solving modules and self-  
16  
17 569 monitoring (Additional File 03, Table d). R01/02's run chart also showed a period of  
18  
19 570 improvement, ending after the last review visit (Additional File 01); nonetheless,  
20  
21 571 reduced life chaos (Additional file 03 – Table f) and interview data suggested an  
22  
23 572 established routine and reduced barriers associated with intensive face-to-face  
24  
25 573 therapist interaction and action/coping plans (Additional File 03, Table d). The tailing  
26  
27 574 off of adherence after the end of the trial in some case study participants may indicate  
28  
29 575 that adherence remained effortful or participation in the trial was motivated by  
30  
31 576 altruism not help-seeking (see quotation from R01/48, above).  
32  
33  
34  
35  
36  
37  
38  
39  
40

### 578 **Modifications to the intervention**

579 Additional file 07 documents 14 technical changes that will be made for the full-scale  
580 RCT, based on the process evaluation findings, to CFHH (n=5), IT infrastructure  
581 (n=1) and to the interventionist training, manual and procedures (n=8). To prevent  
582 adherence data flatlines, nebulisers (#4) and 2net Hubs (#5) will be paired at the  
583 factory. Three changes to CFHH (#6) will make it easier for interventionists to  
584 view/edit prescription data and to handle alternating treatment regimens (#3). Other  
585 changes to CFHH will include making graphs more easily interpretable and, based on  
586 interview data and PPI feedback, adding descriptions to videos. Changes to the



1  
2  
3 587 interventionist manual (#8) will increase the emphasis on ‘active ingredients’,  
4  
5 588 introduce intervention triggers for reduced adherence or exacerbations and introduce  
6  
7 589 new habit formation sessions. The need for increased numbers of protocolised  
8  
9  
10 590 intervention review sessions arose because, in the feasibility study, a focus on RCT  
11  
12 591 recruitment targets gave interventionists inadequate time to deliver review visits (#18,  
13  
14 592 #24), critical for updating personalised action plans (#25) and updating coping plans  
15  
16 593 (#26). Training (#9) in the full-scale trial will be delivered as an intensive one-week  
17  
18 594 course, with more explicit focus on intervention fidelity, supported by new case study  
19  
20 595 data and role plays to ensure baseline competency (#17).  
21  
22  
23  
24  
25  
26

## 27 **Discussion**

28 597 The process evaluation identified elements of the intervention which could be  
29  
30 598 improved and 14 changes were documented. The complex intervention was developed  
31  
32 599 using mixed methods research with an inter-disciplinary, person-centred and iterative  
33  
34 600 approach[68–74]. The mere usage of a digital behaviour change intervention may not  
35  
36 601 indicate engagement or lead to desired outcomes[68,73,75–78]; there is no simple  
37  
38 602 dose-response relationship[79]. In fact, for those with low motivation and low  
39  
40 603 confidence, evidence of non-adherence can be threatening[80,81]. With different  
41  
42 604 baseline motivation and life chaos, a population-level definition of “effective  
43  
44 605 engagement”[70] may be infeasible, but contextual and motivational data may still  
45  
46 606 explain patterns observed in run charts[82]. What may matter more than defining  
47  
48 607 engagement is the correct assessment and tailoring of management to different  
49  
50 608 psychosocial barriers[69,83–91]. Our study suggests that digital systems cannot  
51  
52 609 replace, only complement, face-to-face interaction between health professionals and  
53  
54 610 patients[92–95], potentially creating a sense of ‘accountability’ consistent with  
55  
56  
57  
58  
59  
60

1  
2  
3 612 control theory[46,96]. However, it is important to recognise that in the absence of  
4  
5 613 objective adherence data clinicians and patients will find it difficult to even begin to  
6  
7  
8 614 engage with behaviour change.  
9

10 615  
11  
12 616 Chronic disease self-management is a complex and multi-factorial problem and, we  
13  
14 617 were unable to cover all of the analyses that many would consider relevant. For  
15  
16 618 instance, although the intervention is meant to increase health literacy through  
17  
18 619 education, we cannot rule out that baseline socio-economic status, known to affect  
19  
20 620 health literacy, outcomes and self-management[97–99], was not a factor. Another  
21  
22 621 limitation of this study is that we interviewed just over only one quarter of the pilot  
23  
24 622 trial sample. Given a relatively homogeneous population, narrow, exploratory study  
25  
26 623 aims and the use of established theory, fourteen interviews should be adequate to  
27  
28 624 discern common perceptions and experiences[100,101]. In the full-scale evaluation of  
29  
30 625 this intervention (see below), the process evaluation will involve a user acceptability  
31  
32 626 survey of ~250 intervention users from 19 centres and face-to-face interviews with  
33  
34 627 over 50 intervention users, interventionists and clinicians. As in many other process  
35  
36 628 evaluations, we will use maximum variation sampling on sociodemographic  
37  
38 629 characteristics and baseline adherence, alongside triangulation, to minimise the risk of  
39  
40 630 bias[102]. Additionally, readers should be aware that small scale feasibility work does  
41  
42 631 not generalise in every regard when scaled up in larger scale studies[103,104].  
43  
44 632 Finally, early health economic modelling of the cost-effectiveness[105], was not  
45  
46 633 updated as part of this feasibility work, but will be revisited in 2021 as part of the full-  
47  
48 634 scale evaluation.  
49  
50  
51  
52  
53  
54  
55  
56  
57  
58  
59  
60

1  
2  
3 636 Our use of objective adherence measurement overcomes the limitations of previous  
4  
5 637 studies[106] and confirms that subjective and objective adherence are poorly  
6  
7 638 aligned[23]. This process evaluation has succeeded in demonstrating that delivery of  
8  
9 639 this intervention is possible in busy clinical settings; participant uptake was high and,  
10  
11 640 with further development on the basis of these findings, the process of gathering  
12  
13 641 objective adherence data and implementing it alongside a behavioural intervention is  
14  
15 642 both possible and effective.

16  
17 643 Given the known difficulties with nebuliser use among PWCF, interventions that can  
18  
19 644 make it less effortful are important[107]. In particular, healthy behaviours are better  
20  
21 645 predicted by a patient's level of automatic behavioural repetition than their beliefs or  
22  
23 646 experiences, meaning a focus on increasing habit strength is critical for chronic  
24  
25 647 disease self-management[108]. Through delivery of intervention components  
26  
27 648 designed to promote habit formation, we intend to reduce effort with the CFHH  
28  
29 649 intervention. We are limited in drawing conclusions as to the impact of habit  
30  
31 650 formation components of the intervention from this analysis; this is mostly due to the  
32  
33 651 limited time constraints of the feasibility study leaving insufficient opportunity for  
34  
35 652 habit formation[109]. However, there was some indication that habit components  
36  
37 653 were useful and we have elsewhere demonstrated the importance of habit in high  
38  
39 654 adherence [110,111]. It has also been indicated that adherence interventions focusing  
40  
41 655 on habit formation are the most effective[112].

42  
43 656 Successful habit formation will reduce burden by making sustained self-care  
44  
45 657 automatic. The CFHH intervention aims to deliver the fall in burden highlighted by  
46  
47 658 the Lind alliance prioritisation exercise as the most important goal of CF research.

48  
49  
50  
51  
52  
53  
54  
55  
56 659

1  
2  
3 660 To date, there is little previous research showing the effects of giving patients access  
4  
5 661 to their data, with respect to health outcomes and cost-effectiveness. Amidst the  
6  
7 662 evidence that does exist, the research is generally poor and lacks information about  
8  
9 663 context and implementation[113,114]. Following modifications made to our complex  
10  
11 664 intervention, the full scale RCT across 19 UK centres (ISRCTN55504164) will  
12  
13 665 provide high quality evidence, indicating the impact of adherence data on sustained  
14  
15 666 self-care. The full-scale RCT will include a further process evaluation and health-  
16  
17 667 economic modelling. Furthermore, the CFHealthHub Data Observatory  
18  
19 668 (ISRCTN14464661) following on from the RCT will address the issue of how to  
20  
21 669 embed the use of adherence data in routine practice for healthcare professionals[115–  
22  
23 670 119] . The sites involved in the reported pilot study have now transitioned into the  
24  
25 671 Data Observatory, eventually to be joined by sites involved in the full-scale RCT.  
26  
27 672 Data collected in the data observatory quality improvement project will be used in the  
28  
29 673 development of generalisable theory and practical guidance about the collaborative  
30  
31 674 use of adherence data [120–122], with a focus on optimising the use of health care  
32  
33 675 resources and improving patient care [66,123]. The Observatory will act as a platform  
34  
35 676 for efficient trials[124,125], providing an opportunity to share processes and  
36  
37 677 improvement activities to enable participating CF clinical research teams to meet the  
38  
39 678 demands of future research [126].  
40  
41  
42  
43  
44  
45  
46  
47

## 679 **Conclusions**

48 680 We have developed a theory-based complex intervention to help PWCF adhere to  
49  
50 681 their medication and form habits of sustained self-care. The process evaluation  
51  
52 682 identified potential sources of intervention failure and modifications have been made  
53  
54 683 accordingly. With improved intervention processes, it is feasible and acceptable to  
55  
56  
57  
58  
59  
60

684 support sustained self-care via medication adherence through the application of  
685 behaviour change theory delivered through digital and human components.

## 686 **Declarations**

### 687 **List of abbreviations**

688 CF – Cystic Fibrosis  
689 CFHH – CFHealthHub complex intervention  
690 CFQ-R – Cystic Fibrosis Questionnaire-Revised  
691 CHAOS - Confusion, Hubbub, and Order Scale  
692 COM- BMQ – The Capability Opportunity Motivation Behaviour Beliefs  
693 Questionnaire  
694 EQ-5D-5L – EuroQol generic health status measure  
695 FEV1 - Forced expiratory volume in 1 second  
696 GAD-7 – General Anxiety Disorder 7-item  
697 IT – Information Technology  
698 IVAB - Intravenous Antibiotics  
699 MAD-3 Medication Adherence Data  
700 MDT – Multi-Disciplinary Team  
701 PAM-13 - Patient Activation Measure  
702 PHQ-8 – Patient Health Questionnaire depression scale  
703 PWCF – People With Cystic Fibrosis  
704 RCT – Randomised Controlled Trial  
705 SRBAI – Self-Report Behavioural Automaticity Index  
706

### 707 **Ethics, consent and permissions**

708 Written informed consent was obtained prior to participation.

### 709 **Ethical approval**

710 The study received ethical approval from the London Brent Research Ethics  
711 Committee (16/LO/0356).

### 712 **Consent for publication**

713 In the consent form, participants signed a statement to confirm consent for publication  
714 of anonymised quotes, in reports, conference presentations and journal publications.

### 715 **Availability of data and materials**

716 Requests for further data not available in this publication can be directed at Sheffield  
717 Clinical Trials Research Unit. Email: ctru@sheffield.ac.uk Tel: 0114 222 0866

### 718 **Competing interests**

719 Martin J Wildman received funding from Zambon and support from Philips  
720 Respiration for the early intervention development work. This has not had any direct  
721 influence on the feasibility study reported here. In addition, Martin Wildman has

1  
2  
3 722 worked with Pari to carry out studies using the e-track. This has not had any direct  
4 723 influence on the feasibility study reported here. The University of Manchester  
5 724 software team received funding from Pari to create a medication reporting component  
6 725 within the CFHealthHub software. This has not had any direct influence on the  
7 726 feasibility study reported here.  
8 727

9 728 The other authors declare that they have no competing interests.

## 10 729 **Funding**

11  
12 730 This report presents independent research funded by the NIHR under its Grants for  
13 731 Applied Research Programme (Grant Reference Number RP-PG-1212-20015). The  
14 732 views and opinions expressed by authors in this publication are those of the authors  
15 733 and do not necessarily reflect those of the NHS, the NIHR, Medical Research Council  
16 734 (MRC), Central Commissioning Facility (CCF), the Programme Grants for Applied  
17 735 Research Programme, or the Department of Health and Social Care.  
18 736  
19 737

## 20 738 **Authors' contributions**

21 739  
22 740 Daniel Hind (Assistant Director, CTRU), Sarah Drabble (Research Associate) and Laura  
23 741 Mandefield (Statistician), together produced the first draft of the report.  
24 742

25 743 The following conceived of or designed the work: Martin Wildman (Consultant Respiratory  
26 744 Physician), Alicia O’Cathain (Professor of Health Services Research), Stephen Walters  
27 745 (Professor of Medical Statistics and Clinical Trials), Madelynne Arden (Professor of Health  
28 746 Psychology), Marlene Hutchings (Physiotherapist), Judy Bradley (Professor of  
29 747 Physiotherapy), John Ainsworth (Professor of Health Informatics), Daniel Beever (Patient  
30 748 and Public Involvement Representative) and Daniel Hind.  
31 749

32 750 The following were involved in the acquisition of data for the work: Julia Nightingale  
33 751 (Consultant in Respiratory Medicine), Mark Allenby (Consultant in Respiratory Medicine),  
34 752 Jane Dewar (Consultant in Respiratory Medicine), Sarah Drabble, Madelynne Arden, Chin  
35 753 Maguire, Hannah Cantrill, Alexander Scott (Research Associate), Sam Keating (Research  
36 754 Associate), Marlene Hutchings and Pauline Whelan (mHealth Applications Manager).  
37 755

38 756 The following were involved in the analysis of data: Daniel Hind, Sarah Drabble, Alicia  
39 757 O’Cathain, Daniel Beever, Alexander Scott, Sam Keating, Madelynne Arden, Laura  
40 758 Mandefield, Simon Waterhouse (Data Manager).  
41 759

42 760 Daniel Hind, Sarah Drabble, Madelynne Arden, Laura Mandefield, Simon Waterhouse, Chin  
43 761 Maguire, Hannah Cantrill, Louisa Robinson, Marlene Hutchings, Judy Bradley, Julia  
44 762 Nightingale, Mark Allenby, Jane Dewar, Daniel Beever, Stephen Walters, Alicia O’Cathain,  
45 763 Martin J Wildman, were involved in the interpretation of data for the work.  
46 764

47 765 All authors were involved in the final approval of the version to be published.  
48 766

49 767 All authors agree to be accountable for all aspects of the work in ensuring that questions  
50 768 related to the accuracy or integrity of any part of the work are appropriately investigated and  
51 769 resolved.  
52 770

1  
2  
3  
4  
5  
6  
7  
8  
9  
10  
11  
12  
13  
14  
15  
16  
17  
18  
19  
20  
21  
22  
23  
24  
25  
26  
27  
28  
29  
30  
31  
32  
33  
34  
35  
36  
37  
38  
39  
40  
41  
42  
43  
44  
45  
46  
47  
48  
49  
50  
51  
52  
53  
54  
55  
56  
57  
58  
59  
60

771 **Acknowledgements**

772

773 We would like to thank the trial participants who offered us their time. We gratefully  
774 acknowledge the clerical and other input of Helen Wakefield, Heather Dakin, Katie  
775 Shore and Louise Turner, trial support officers.

776

777 We would also like to thank Claire Oliver, Fiona Haynes and Lisa Evans for their  
778 commitment and hard work in delivering the intervention and supporting the study.

779

780 Professor Walters is a National Institute for Health Research (NIHR) Senior  
781 Investigator. The views expressed in this article are those of the author(s) and not  
782 necessarily those of the NHS, the NIHR, or the Department of Health and Social  
783 Care.

784

785

For peer review only



786 **References**

- 787 1 Bell SC, Mall MA, Gutierrez H, *et al.* The future of cystic fibrosis care: a  
788 global perspective. *Lancet Respir Med* 2020;**8**:65–124. doi:10.1016/S2213-  
789 2600(19)30337-6
- 790 2 Jeffery A, Charman S, Cosgriff R, *et al.* *UK Cystic Fibrosis Registry Annual*  
791 *Data Report 2016*. London: : Cystic Fibrosis Trust 2017.
- 792 3 Cystic Fibrosis Foundation. *Annual Data Report 2016 Cystic Fibrosis*  
793 *Foundation Patient Registry*. Bethesda, Maryland: : Cystic Fibrosis Foundation  
794 Patient 2017. [https://www.cff.org/Research/Researcher-Resources/Patient-](https://www.cff.org/Research/Researcher-Resources/Patient-Registry/2016-Patient-Registry-Annual-Data-Report.pdf)  
795 [Registry/2016-Patient-Registry-Annual-Data-Report.pdf](https://www.cff.org/Research/Researcher-Resources/Patient-Registry/2016-Patient-Registry-Annual-Data-Report.pdf)
- 796 4 European Cystic Fibrosis Society. *ECFS Patient Registry Annual Data Report*.  
797 Karup, Denmark: : European Cystic Fibrosis Society 2013.
- 798 5 Ahern S, Sims G, Tacey M, *et al.* *The Australian Cystic Fibrosis Data Registry*  
799 *Annual Report, 2015*. Monash University, Department of Epidemiology and  
800 *Preventive Medicine, October 2017, Report No 18*. Melbourne, Victoria: :  
801 Australian Cystic Fibrosis Data Registry 2017.
- 802 6 Cystic Fibrosis Canada. *The Canadian CF Registry 2016 Annual Data Report*.  
803 Toronto: : Cystic Fibrosis Canada 2017.  
804 [http://www.cysticfibrosis.ca/uploads/2016 Registry Annual Data Report.pdf](http://www.cysticfibrosis.ca/uploads/2016%20Registry%20Annual%20Data%20Report.pdf)
- 805 7 Southern KW, Barker PM, Solis-Moya A, *et al.* Macrolide antibiotics for cystic  
806 fibrosis. In: Southern KW, ed. *Cochrane Database of Systematic Reviews*.  
807 Chichester, UK: : John Wiley & Sons, Ltd 2011.  
808 doi:10.1002/14651858.CD002203.pub3
- 809 8 Ramsey BW, Davies J, McElvaney NG, *et al.* A CFTR Potentiator in Patients  
810 with Cystic Fibrosis and the *G551D* Mutation. *N Engl J Med* 2011;**365**:1663–  
811 72. doi:10.1056/NEJMoa1105185



- 1  
2  
3 812 9 McCoy KS, Quittner AL, Oermann CM, *et al.* Inhaled aztreonam lysine for  
4  
5 813 chronic airway *Pseudomonas aeruginosa* in cystic fibrosis. *Am J Respir Crit*  
6  
7 814 *Care Med* 2008;**178**:921–8.
- 8  
9  
10 815 10 Ryan G, Mukhopadhyay S, Singh M. Nebulised anti-pseudomonal antibiotics  
11  
12 816 for cystic fibrosis. In: Ryan G, ed. *Cochrane Database of Systematic Reviews*.  
13  
14 817 Chichester, UK: : John Wiley & Sons, Ltd 2003.  
15  
16 818 doi:10.1002/14651858.CD001021
- 17  
18  
19 819 11 Jones AP, Wallis C. Dornase alfa for cystic fibrosis. In: Jones AP, ed.  
20  
21 820 *Cochrane Database of Systematic Reviews*. Chichester, UK: : John Wiley &  
22  
23 821 Sons, Ltd 2010. doi:10.1002/14651858.CD001127.pub2
- 24  
25  
26 822 12 Wark P, McDonald VM. Nebulised hypertonic saline for cystic fibrosis. In:  
27  
28 823 Wark P, ed. *Cochrane Database of Systematic Reviews*. Chichester, UK: : John  
29  
30 824 Wiley & Sons, Ltd 2009. doi:10.1002/14651858.CD001506.pub3
- 31  
32  
33 825 13 Ryan G, Singh M, Dwan K. Inhaled antibiotics for long-term therapy in cystic  
34  
35 826 fibrosis. *Cochrane database Syst Rev* 2011;:CD001021.  
36  
37 827 doi:10.1002/14651858.CD001021.pub2
- 38  
39  
40 828 14 Eakin MN, Bilderback A, Boyle MP, *et al.* Longitudinal association between  
41  
42 829 medication adherence and lung health in people with cystic fibrosis. *J Cyst*  
43  
44 830 *Fibros* 2011;**10**:258. doi:10.1016/j.jcf.2011.03.005
- 45  
46  
47 831 15 Briesacher BA, Quittner AL, Saiman L, *et al.* Adherence with tobramycin  
48  
49 832 inhaled solution and health care utilization. *BMC Pulm Med* 2011;**11**:5.  
50  
51 833 doi:10.1186/1471-2466-11-5
- 52  
53  
54 834 16 Smyth A, Lewis S, Bertenshaw C, *et al.* Case-control study of acute renal  
55  
56 835 failure in patients with cystic fibrosis in the UK. *Thorax* 2008;**63**:532–5.  
57  
58 836 doi:10.1136/thx.2007.088757  
59  
60

- 1  
2  
3 837 17 Mayer-Hamblett N, Rosenfeld M, Emerson J, *et al.* Developing Cystic Fibrosis  
4  
5 838 Lung Transplant Referral Criteria Using Predictors of 2-Year Mortality. *Am J*  
6  
7 839 *Respir Crit Care Med* 2002;**166**:1550–5. doi:10.1164/rccm.200202-087OC  
8  
9  
10 840 18 Shiers D, Rafi I, Cooper S, *et al.* 2014 update (with acknowledgement to the  
11  
12 841 late Helen Lester for her contribution to the original 2012 version) Positive  
13  
14 842 Cardiometabolic Health Resource: an intervention framework for patients with  
15  
16 843 psychosis and schizophrenia. *R Coll Psychiatr* 2014;:London.  
17  
18  
19 844 19 Quittner AL, Zhang J, Marynchenko M, *et al.* Pulmonary medication adherence  
20  
21 845 and health-care use in cystic fibrosis. *Chest* 2014;**146**:142–51.  
22  
23 846 doi:10.1378/chest.13-1926  
24  
25  
26 847 20 Narayanan S, Mainz JG, Gala S, *et al.* Adherence to therapies in cystic fibrosis:  
27  
28 848 a targeted literature review. *Expert Rev Respir Med* 2017;**11**:129–45.  
29  
30 849 doi:10.1080/17476348.2017.1280399  
31  
32  
33 850 21 McManus P. Lead Pharmacist - specialised services (South Yorkshire and  
34  
35 851 Bassetlaw) NHS England.  
36  
37  
38 852 22 McNeil S. Personal communication from Stephanie McNeil, Chief Statistician  
39  
40 853 of UK CF Registry.  
41  
42 854 23 Daniels T, Goodacre L, Sutton C, *et al.* Accurate assessment of adherence: self-  
43  
44 855 report and clinician report vs electronic monitoring of nebulizers. *Chest*  
45  
46 856 2011;**140**:425–32. doi:10.1378/chest.09-3074  
47  
48  
49 857 24 Hoo Z, Curley R, Walters S, *et al.* Exploring the implications of different  
50  
51 858 approaches to estimate centre-level adherence using objective adherence data  
52  
53 859 in an adult cystic fibrosis centre - a retrospective observational study. *J Cyst*  
54  
55 860 *Fibros* 2020;**19**:162–7. doi:10.1016/j.jcf.2019.10.008  
56  
57  
58 861 25 White H, Shaw N, Denman S, *et al.* Variation in lung function as a marker of  
59  
60

- 1  
2  
3 862 adherence to oral and inhaled medication in cystic fibrosis. *Eur Respir J*  
4  
5 863 2017;**49**:1600987. doi:10.1183/13993003.00987-2016  
6  
7 864 26 Daniels T, Goodacre L, Sutton C, *et al.* Accurate Assessment of Adherence.  
8  
9 865 *Chest* 2011;**140**:425–32. doi:10.1378/chest.09-3074  
10  
11 866 27 Sawicki GS, Sellers DE, Robinson WM. High treatment burden in adults with  
12  
13 867 cystic fibrosis: Challenges to disease self-management. *J Cyst Fibros*  
14  
15 868 2009;**8**:91–6. doi:10.1016/j.jcf.2008.09.007  
16  
17 869 28 Horne RW, Barber N, Elliot R, *et al.* Concordance, adherence and compliance  
18  
19 870 in medicine taking: A conceptual map and research priorities. National Co-  
20  
21 871 ordinating Centre for NHS Service Delivery and Organisational R&D  
22  
23 872 (NCCSDO). 2005.  
24  
25 873 29 James Lind Alliance. Priority Setting Partnership: Cystic Fibrosis.  
26  
27 874 2017.<http://www.jla.nihr.ac.uk/priority-setting-partnerships/cystic-fibrosis/>  
28  
29 875 (accessed 2 Jun 2017).  
30  
31 876 30 Hind D, Drabble SJ, Arden MA, *et al.* Supporting medication adherence for  
32  
33 877 adults with cystic fibrosis: a randomised feasibility study. *BMC Pulm Med*  
34  
35 878 2019;**19**:77. doi:10.1186/s12890-019-0834-6  
36  
37 879 31 Bugge C, Williams B, Hagen S, *et al.* A process for Decision-making after  
38  
39 880 Pilot and feasibility Trials (ADePT): development following a feasibility study  
40  
41 881 of a complex intervention for pelvic organ prolapse. *Trials* 2013;**14**:353.  
42  
43 882 doi:10.1186/1745-6215-14-353  
44  
45 883 32 Drabble S, O’Cathain A, Scott A, *et al.* Mechanisms of relationship, visibility  
46  
47 884 and fit within a complex intervention to improve nebuliser adherence in adults  
48  
49 885 with cystic fibrosis: a qualitative interview study (in press). *J Internet Med Res*  
50  
51 886 2020.  
52  
53  
54  
55  
56  
57  
58  
59  
60

- 1  
2  
3 887 33 Arden M, Hind D, Drabble S. Applying the Theoretical Domains Framework:  
4  
5 888 adherence to nebuliser treatment in adults with cystic fibrosis. In: *Complex*  
6  
7 889 *interventions in a complex world: applications of Behavioural Medicine: 12th*  
8  
9 890 *UKSBM Annual Scientific Meeting, Cardiff, 1st-2nd Dec 2016* . 2016. 0021.  
10  
11  
12 891 34 Cherryholmes CH. Notes on Pragmatism and Scientific Realism. *Educ Res*  
13  
14 892 1992;**21**:13–7. doi:10.3102/0013189X021006013  
15  
16  
17 893 35 Yin RK. *Case Study Research: Design and Methods*. London: : Sage 2014.  
18  
19 894 36 Ritchie J, Spencer L. Qualitative data analysis for applied policy research. In:  
20  
21 895 Bryman A, Burgess RG, eds. *Analysing qualitative data*. Routledge 1994. 173–  
22  
23 896 94.  
24  
25  
26 897 37 Cane J, O’Connor D, Michie S. Validation of the theoretical domains  
27  
28 898 framework for use in behaviour change and implementation research.  
29  
30 899 *Implement Sci* 2012;**7**:37. doi:10.1186/1748-5908-7-37  
31  
32  
33 900 38 Linnan L, Steckler A. Process evaluation for public health interventions and  
34  
35 901 research: an overview. In: Linnan L, Steckler A, eds. *Process evaluation for*  
36  
37 902 *public health interventions and research*. San Francisco: : Jossey-Bass 2002.  
38  
39 903 1–  
40  
41 904 23.[http://media.johnwiley.com.au/product\\_data/excerpt/66/07879597/0787959](http://media.johnwiley.com.au/product_data/excerpt/66/07879597/0787959766.pdf)  
42  
43 905 [766.pdf](http://media.johnwiley.com.au/product_data/excerpt/66/07879597/0787959766.pdf) (accessed 6 May 2014).  
44  
45  
46  
47 906 39 Farmer T, Robinson K, Elliott SJ, *et al*. Developing and implementing a  
48  
49 907 triangulation protocol for qualitative health research. *Qual Health Res*  
50  
51 908 2006;**16**:377–94. doi:10.1177/1049732305285708  
52  
53  
54 909 40 Yin RK. Analyzing Case Study Evidence: How to Start Your Analysis , Your  
55  
56 910 Analytic Choices , and How They Work. In: *Case Study Research: Design and*  
57  
58 911 *Methods*. London: : Sage 2014. 133–76. doi:10.1111/bjd.13028  
59  
60

- 1  
2  
3 912 41 Guetterman TC, Fetters MD, Creswell JW. Integrating quantitative and  
4  
5 913 qualitative results in health science mixed methods research through joint  
6  
7 914 displays. *Ann Fam Med* 2015;**13**:554–61. doi:10.1370/afm.1865  
8  
9  
10 915 42 Fetters MD, Curry LA, Creswell JW. Achieving integration in mixed methods  
11  
12 916 designs - Principles and practices. *Health Serv Res* 2013;**48**:2134–56.  
13  
14 917 doi:10.1111/1475-6773.12117  
15  
16  
17 918 43 Simons H. Case Study Research: In-Depth Understanding in Context. In:  
18  
19 919 Leavy P, ed. *The Oxford Handbook of Qualitative Research*. Oxford: : Oxford  
20  
21 920 University Press 2014. 455–70.  
22  
23  
24 921 44 Perla RJ, Provost LP, Murray SK. The run chart: a simple analytical tool for  
25  
26 922 learning from variation in healthcare processes. *BMJ Qual Saf* 2011;**20**:46–51.  
27  
28 923 doi:10.1136/bmjqs.2009.037895  
29  
30  
31 924 45 Bandura A. Social Cognitive Theory: An Agentic Perspective. *Annu Rev*  
32  
33 925 *Psychol* 2001;**52**:1–26. doi:10.1146/annurev.psych.52.1.1  
34  
35  
36 926 46 Carver CS, Scheier MF. Control theory: a useful conceptual framework for  
37  
38 927 personality-social, clinical, and health psychology. *Psychol Bull* 1982;**92**:111–  
39  
40 928 35. doi:10.1037/0033-2909.92.1.111  
41  
42  
43 929 47 Ho YC. Abduction ? Deduction ? Induction ? Is there a Logic of Exploratory  
44  
45 930 Data Analysis ? *Proc Annu Meet Am Educ Res Assoc* 1994;:28.  
46  
47 931 doi:http://citeseerx.ist.psu.edu/viewdoc/download?doi=10.1.1.135.3507&rep=r  
48  
49 932 ep1&type=pdf  
50  
51  
52 933 48 Peirce CS. How to make our ideas clear. *Pop Sci Mon* 1878;**12**:286–302.  
53  
54 934 49 Swedberg R. Before theory comes theorizing or how to make social science  
55  
56 935 more interesting. *Br J Sociol* 2016;**67**. doi:10.1111/1468-4446.12184  
57  
58  
59 936 50 Timmermans S, Tavory I. Theory Construction in Qualitative Research: From  
60

- 1  
2  
3 937 Grounded Theory to Abductive Analysis. *Sociol Theory* 2012;**30**:167–86.  
4  
5 938 doi:10.1177/0735275112457914  
6  
7  
8 939 51 Miles MB, Huberman AM, Saldaña J. Methods of Ordering. In: *Qualitative*  
9  
10 940 *Data Analysis: A Methods Sourcebook*. London: 2014. 193–220.  
11  
12 941 52 Hoo ZH, Boote J, Wildman MJ, *et al*. Determinants of objective adherence to  
13  
14 942 nebulised medications among adults with cystic fibrosis: an exploratory mixed  
15  
16 943 methods study comparing low and high adherers. *Heal Psychol Behav Med*  
17  
18 944 2017;**5**:299–316. doi:10.1080/21642850.2017.1338958  
19  
20  
21 945 53 Wong MD, Sarkisian C a., Davis C, *et al*. The Association Between Life  
22  
23 946 Chaos, Health Care Use, and Health Status Among HIV-Infected Persons. *J*  
24  
25 947 *Gen Intern Med* 2007;**22**:1286–91. doi:10.1007/s11606-007-0265-6  
26  
27  
28 948 54 Horne R, Weinman J, Hankins M. The beliefs about medicines questionnaire:  
29  
30 949 The development and evaluation of a new method for assessing the cognitive  
31  
32 950 representation of medication. *Psychol Health* 1999;**14**:1–24.  
33  
34 951 doi:10.1080/08870449908407311  
35  
36  
37 952 55 Clegg D, Barker R. *Case Method Fast-Track: A RAD Approach*. Boston, MA: :  
38  
39 953 Addison-Wesley 1994.  
40  
41  
42 954 56 Bittner K, Spence I. *Use Case Modeling*. Boston, MA: : Addison-Wesley  
43  
44 955 Professional 2002.  
45  
46  
47 956 57 Craig Larman. *Agile and Iterative Development: A Manager's Guide*. Boston,  
48  
49 957 MA: : Addison-Wesley 2004.  
50  
51 958 58 Govan JR. Infection control in cystic fibrosis: methicillin-resistant  
52  
53 959 *Staphylococcus aureus*, *Pseudomonas aeruginosa* and the *Burkholderia cepacia*  
54  
55 960 complex. *J R Soc Med* 2000;**93 Suppl 3**:40–  
56  
57 961 5.<http://www.ncbi.nlm.nih.gov/pubmed/10911818>  
58  
59  
60

- 1  
2  
3 962 59 Wildman MJ, Hoo ZH. Moving cystic fibrosis care from rescue to prevention  
4  
5 963 by embedding adherence measurement in routine care. *Paediatr Respir Rev*  
6  
7 964 2014;**15**:16–8. doi:10.1016/j.prrv.2014.04.007  
8  
9  
10 965 60 Schattner A. Predictors of Adherence to Inhaled Medications. *J Gen Intern*  
11  
12 966 *Med* 2013;**28**:758–758. doi:10.1007/s11606-013-2384-6  
13  
14 967 61 Battaglia M, Atkinson MA. The Streetlight Effect in Type 1 Diabetes. *Diabetes*  
15  
16 968 2015;**64**:1081–90. doi:10.2337/db14-1208  
17  
18 969 62 Kaplan A. *The Conduct of Inquiry: Methodology for Behavioral Science*. New  
19  
20 970 Brunswick, N.J.: : Transaction Publishers 1964.  
21  
22 971 63 Tversky A, Kahneman D. Availability: A heuristic for judging frequency and  
23  
24 972 probability. *Cogn Psychol* 1973;**5**:207–32. doi:10.1016/0010-0285(73)90033-9  
25  
26 973 64 Flume PA, Clancy JP, Retsch-Bogart GZ, *et al*. Continuous alternating inhaled  
27  
28 974 antibiotics for chronic pseudomonal infection in cystic fibrosis. *J Cyst Fibros*  
29  
30 975 2016;**15**:809–15. doi:10.1016/j.jcf.2016.05.001  
31  
32 976 65 Michie S, Atkins L, West R. *The Behaviour Change Wheel: A Guide To*  
33  
34 977 *Designing Interventions*. Sutton: : Silverback Publishing 2014.  
35  
36 978 66 National Institute for Health and Care Excellence. *Medicines optimisation: the*  
37  
38 979 *safe and effective use of medicines to enable best possible outcomes (NG5)*.  
39  
40 980 London: : NICE 2015.  
41  
42 981 67 Carver CS, Scheier MF. *On the self-regulation of behavior*. Cambridge: :  
43  
44 982 Cambridge University Press 2001.  
45  
46 983 68 Yardley L, Spring BJ, Riper H, *et al*. Understanding and Promoting Effective  
47  
48 984 Engagement With Digital Behavior Change Interventions. *Am J Prev Med*  
49  
50 985 2016;**51**:833–42. doi:10.1016/j.amepre.2016.06.015  
51  
52 986 69 Allemann SS, Nieuwlaat R, van den Bemt BJB, *et al*. Matching Adherence  
53  
54  
55  
56  
57  
58  
59  
60



- 1  
2  
3 987 Interventions to Patient Determinants Using the Theoretical Domains  
4  
5 988 Framework. *Front Pharmacol* 2016;**7**:429. doi:10.3389/fphar.2016.00429  
6  
7  
8 989 70 Michie S, Yardley L, West R, *et al.* Developing and evaluating digital  
9  
10 990 interventions to promote behavior change in health and health care:  
11  
12 991 Recommendations resulting from an international workshop. *J Med Internet*  
13  
14 992 *Res* 2017;**19**. doi:10.2196/jmir.7126  
15  
16  
17 993 71 Murray E, Hekler EB, Andersson G, *et al.* Evaluating Digital Health  
18  
19 994 Interventions: Key Questions and Approaches. *Am J Prev Med* 2016;**51**:843–  
20  
21 995 51. doi:10.1016/j.amepre.2016.06.008  
22  
23  
24 996 72 Car J, Tan WS, Huang Z, *et al.* eHealth in the future of medications  
25  
26 997 management: personalisation, monitoring and adherence. *BMC Med*  
27  
28 998 2017;**15**:73. doi:10.1186/s12916-017-0838-0  
29  
30  
31 999 73 Baumel A, Birnbaum ML, Sucala M. A Systematic Review and Taxonomy of  
32  
33 1000 Published Quality Criteria Related to the Evaluation of User-Facing eHealth  
34  
35 1001 Programs. *J Med Syst* 2017;**41**:128. doi:10.1007/s10916-017-0776-6  
36  
37  
38 1002 74 Ryan C, Bergin M, Wells JS. Theoretical Perspectives of Adherence to Web-  
39  
40 1003 Based Interventions: a Scoping Review. *Int J Behav Med* Published Online  
41  
42 1004 First: 20 July 2017. doi:10.1007/s12529-017-9678-8  
43  
44  
45 1005 75 Van Gemert-Pijnen JE, Kelders SM, Bohlmeijer ET. Understanding the Usage  
46  
47 1006 of Content in a Mental Health Intervention for Depression: An Analysis of Log  
48  
49 1007 Data. *J Med Internet Res* 2014;**16**:e27. doi:10.2196/jmir.2991  
50  
51  
52 1008 76 Strecher V, McClure J, Alexander G, *et al.* The Role of Engagement in a  
53  
54 1009 Tailored Web-Based Smoking Cessation Program: Randomized Controlled  
55  
56 1010 Trial. *J Med Internet Res* 2008;**10**:e36. doi:10.2196/jmir.1002  
57  
58  
59 1011 77 Danaher BG, Seeley JR. Methodological Issues in Research on Web-Based  
60



- 1  
2  
3 1012 Behavioral Interventions. *Ann Behav Med* 2009;**38**:28–39. doi:10.1007/s12160-  
4  
5 1013 009-9129-0  
6  
7 1014 78 Ainsworth B, Steele M, Stuart B, *et al.* Using an Analysis of Behavior Change  
8  
9 1015 to Inform Effective Digital Intervention Design: How Did the PRIMIT Website  
10  
11 1016 Change Hand Hygiene Behavior Across 8993 Users? *Ann Behav Med*  
12  
13 1017 2017;**51**:423–31. doi:10.1007/s12160-016-9866-9  
14  
15 1018 79 Hawe P. Lessons from complex interventions to improve health. *Annu Rev*  
16  
17 1019 *Public Health* 2015;**36**:307–23. doi:10.1146/annurev-publhealth-031912-  
18  
19 1020 114421  
20  
21 1021 80 Sherman DAK, Nelson LD, Steele CM. Do Messages about Health Risks  
22  
23 1022 Threaten the Self? Increasing the Acceptance of Threatening Health Messages  
24  
25 1023 Via Self-Affirmation. *Personal Soc Psychol Bull* 2000;**26**:1046–58.  
26  
27 1024 doi:10.1177/01461672002611003  
28  
29 1025 81 Drabble SJ, O’Cathain A, Arden MA, *et al.* When Is Forgetting Not  
30  
31 1026 Forgetting? A Discursive Analysis of Differences in Forgetting Talk Between  
32  
33 1027 Adults With Cystic Fibrosis With Different Levels of Adherence to Nebulizer  
34  
35 1028 Treatments. *Qual Health Res* 2019;**29**:2119–31.  
36  
37 1029 doi:10.1177/1049732319856580  
38  
39 1030 82 Perski O, Blandford A, West R, *et al.* Conceptualising engagement with digital  
40  
41 1031 behaviour change interventions: a systematic review using principles from  
42  
43 1032 critical interpretive synthesis. *Transl Behav Med* 2017;**7**:254–67.  
44  
45 1033 doi:10.1007/s13142-016-0453-1  
46  
47 1034 83 Frazee SG, Muzina DJ, Nease RF. Strategies to Overcome Medication  
48  
49 1035 Nonadherence. *JAMA* 2014;**311**:1693. doi:10.1001/jama.2014.1760  
50  
51 1036 84 Mohammed MA, Moles RJ, Chen TF. Medication-related burden and patients’  
52  
53  
54  
55  
56  
57  
58  
59  
60

- 1  
2  
3 1037 lived experience with medicine: a systematic review and metasynthesis of  
4  
5 1038 qualitative studies. *BMJ Open* 2016;**6**:e010035. doi:10.1136/bmjopen-2015-  
6  
7 1039 010035  
8  
9  
10 1040 85 Huygens MWJ, Vermeulen J, Swinkels ICS, *et al.* Expectations and needs of  
11  
12 1041 patients with a chronic disease toward self-management and eHealth for self-  
13  
14 1042 management purposes. *BMC Health Serv Res* 2016;**16**:232.  
15  
16 1043 doi:10.1186/s12913-016-1484-5  
17  
18  
19 1044 86 Kelders SM, Oinas-Kukkonen H, Oörni A, *et al.* Health Behavior Change  
20  
21 1045 Support Systems as a research discipline; a viewpoint. *Int J Med Inform*  
22  
23 1046 Published Online First: 2016. doi:10.1016/j.ijmedinf.2016.06.022  
24  
25  
26 1047 87 Rathbone AP, Todd A, Jamie K, *et al.* A systematic review and thematic  
27  
28 1048 synthesis of patients' experience of medicines adherence. *Res Soc Adm Pharm*  
29  
30 1049 Published Online First: 2016. doi:10.1016/j.sapharm.2016.06.004  
31  
32  
33 1050 88 O'Connor S, Hanlon P, O'Donnell CA, *et al.* Understanding factors affecting  
34  
35 1051 patient and public engagement and recruitment to digital health interventions: a  
36  
37 1052 systematic review of qualitative studies. *BMC Med Inform Decis Mak*  
38  
39 1053 2016;**16**:120. doi:10.1186/s12911-016-0359-3  
40  
41  
42 1054 89 Bond CM. Adherence: the Holy Grail? *BMJ Qual Saf* 2016;**25**:736–8.  
43  
44 1055 doi:10.1136/bmjqs-2015-004886  
45  
46  
47 1056 90 Cammidge SL, Duff AJA, Latchford GJ, *et al.* When Women with Cystic  
48  
49 1057 Fibrosis Become Mothers: Psychosocial Impact and Adjustments. *Pulm Med*  
50  
51 1058 2016;**2016**:9458980. doi:10.1155/2016/9458980  
52  
53  
54 1059 91 Powell KR. Patient-Perceived Facilitators of and Barriers to Electronic Portal  
55  
56 1060 Use. *CIN Comput Informatics, Nurs* 2017;**35**:565–73.  
57  
58 1061 doi:10.1097/CIN.0000000000000377  
59  
60

- 1  
2  
3 1062 92 Curtis LM, Mullen RJ, Russell A, *et al.* An efficacy trial of an electronic health  
4 record-based strategy to inform patients on safe medication use: The role of  
5 1063 written and spoken communication. *Patient Educ Couns* 2016;**99**:1489–95.  
6  
7 1064 doi:10.1016/j.pec.2016.07.004  
8  
9 1065  
10  
11 1066 93 Morton K, Dennison L, May C, *et al.* Using digital interventions for self-  
12 management of chronic physical health conditions: A meta-ethnography review  
13 1067 of published studies. *Patient Educ Couns* 2017;**100**:616–35.  
14 1068 doi:10.1016/j.pec.2016.10.019  
15 1069  
16  
17 1070 94 Hanlon P, Daines L, Campbell C, *et al.* Telehealth Interventions to Support  
18 Self-Management of Long-Term Conditions: A Systematic Metareview of  
19 1071 Diabetes, Heart Failure, Asthma, Chronic Obstructive Pulmonary Disease, and  
20 1072 Cancer. *J Med Internet Res* 2017;**19**:e172. doi:10.2196/jmir.6688  
21 1073  
22 1074 95 O’Cathain A, Drabble SJ, Foster A, *et al.* Being Human: A Qualitative  
23 Interview Study Exploring Why a Telehealth Intervention for Management of  
24 1075 Chronic Conditions Had a Modest Effect. *J Med Internet Res* 2016;**18**:e163.  
25 1076 doi:10.2196/jmir.5879  
26 1077  
27  
28 1078 96 Oussedik, E., Foy, C.G, Masicampo, E.J., Kamrath, L.K, Anderson, R.E,  
29 1079 Feldman SR (in press). Accountabiliy: a missing construct in models of  
30 1080 adherence behavior and in clinical practice. *Patient Prefer Adherence*  
31 1081 2017;:1285–94. doi:10.2147/PPA.S135895  
32  
33  
34 1082 97 Rudd RE. Health literacy skills of U.S. adults. *Am J Health Behav* 2007;**31**  
35 1083 **Suppl 1**:S8-18. doi:10.5555/ajhb.2007.31.supp.S8  
36  
37  
38 1084 98 DeWalt DA, Pignone M, Malone R, *et al.* Development and pilot testing of a  
39 1085 disease management program for low literacy patients with heart failure.  
40 1086 *Patient Educ Couns* 2004;**55**:78–86. doi:10.1016/j.pec.2003.06.002  
41  
42  
43  
44  
45  
46  
47  
48  
49  
50  
51  
52  
53  
54  
55  
56  
57  
58  
59  
60

- 1  
2  
3 1087 99 Sarkar U, Fisher L, Schillinger D. Is Self-Efficacy Associated With Diabetes  
4  
5 1088 Self-Management Across Race/Ethnicity and Health Literacy? *Diabetes Care*  
6  
7 1089 2006;**29**:823–9. doi:10.2337/diacare.29.04.06.dc05-1615  
8  
9  
10 1090 100 Guest G, Bunce A, Johnson L. How Many Interviews Are Enough?: An  
11  
12 1091 Experiment with Data Saturation and Variability. *Field methods* 2006;**18**:59–  
13  
14 1092 82. doi:10.1177/1525822X05279903  
15  
16  
17 1093 101 Malterud K, Siersma VD, Guassora AD. Sample Size in Qualitative Interview  
18  
19 1094 Studies: Guided by Information Power. *Qual Health Res* 2015;:1–8.  
20  
21 1095 doi:10.1177/1049732315617444  
22  
23  
24 1096 102 Liu H, Mohammed A, Shanthosh J, *et al.* Process evaluations of primary care  
25  
26 1097 interventions addressing chronic disease: a systematic review. *BMJ Open*  
27  
28 1098 2019;**9**:e025127. doi:10.1136/bmjopen-2018-025127  
29  
30  
31 1099 103 Beets MW, Weaver RG, Ioannidis JPA, *et al.* Identification and evaluation of  
32  
33 1100 risk of generalizability biases in pilot versus efficacy/effectiveness trials: a  
34  
35 1101 systematic review and meta-analysis. *Int J Behav Nutr Phys Act* 2020;**17**:19.  
36  
37 1102 doi:10.1186/s12966-020-0918-y  
38  
39  
40 1103 104 Cooper CL, Whitehead A, Pottrill E, *et al.* Are pilot trials useful for predicting  
41  
42 1104 randomisation and attrition rates in definitive studies: A review of publicly  
43  
44 1105 funded trials. *Clin Trials* 2018;**15**:189–96. doi:10.1177/1740774517752113  
45  
46  
47 1106 105 Tappenden P, Sadler S, Wildman M. An Early Health Economic Analysis of  
48  
49 1107 the Potential Cost Effectiveness of an Adherence Intervention to Improve  
50  
51 1108 Outcomes for Patients with Cystic Fibrosis. *Pharmacoeconomics* 2017;**35**:647–  
52  
53 1109 59. doi:10.1007/s40273-017-0500-x  
54  
55  
56 1110 106 O’Donohoe R, Fullen BM. Adherence of subjects with cystic fibrosis to their  
57  
58 1111 home program: a systematic review. *Respir Care* 2014;**59**:1731–46.  
59  
60

- 1  
2  
3 1112 doi:10.4187/respcare.02990  
4  
5 1113 107 Sawicki GS, Goldman DP, Chan W, *et al.* Patient preference for treatment  
6  
7 1114 administration in cystic fibrosis. *Am J Pharm Benefits* 2015;**7**:174–81.  
8  
9 1115 108 Phillips LA, Cohen J, Burns E, *et al.* Self-management of chronic illness: the  
10  
11 1116 role of ‘habit’ versus reflective factors in exercise and medication adherence. *J*  
12  
13 1117 *Behav Med* 2016;**39**:1076–91. doi:10.1007/s10865-016-9732-z  
14  
15 1118 109 Lally P, van Jaarsveld CHM, Potts HWW, *et al.* How are habits formed:  
16  
17 1119 Modelling habit formation in the real world. *Eur J Soc Psychol* 2010;**40**:998–  
18  
19 1120 1009. doi:10.1002/ejsp.674  
20  
21 1121 110 Arden MA, Drabble S, O’Cathain A, *et al.* Adherence to medication in adults  
22  
23 1122 with Cystic Fibrosis: An investigation using objective adherence data and the  
24  
25 1123 Theoretical Domains Framework. *Br J Health Psychol* Published Online First:  
26  
27 1124 March 2019. doi:10.1111/bjhp.12357  
28  
29 1125 111 Hoo ZH, Gardner B, Arden MA, *et al.* Role of habit in treatment adherence  
30  
31 1126 among adults with cystic fibrosis. *Thorax* 2019;**74**:197–9.  
32  
33 1127 doi:10.1136/thoraxjnl-2017-211453  
34  
35 1128 112 Conn VS, Ruppert TM. Medication adherence outcomes of 771 intervention  
36  
37 1129 trials: Systematic review and meta-analysis. *Prev Med (Baltim)* 2017;**99**:269–  
38  
39 1130 76. doi:10.1016/j.ypmed.2017.03.008  
40  
41 1131 113 Goldzweig CL, Orshansky G, Paige NM, *et al.* Electronic patient portals:  
42  
43 1132 evidence on health outcomes, satisfaction, efficiency, and attitudes: a  
44  
45 1133 systematic review. *Ann Intern Med* 2013;**159**:677–87. doi:10.7326/0003-4819-  
46  
47 1134 159-10-201311190-00006  
48  
49 1135 114 Lau AY, Arguel A, Dennis S, *et al.* “Why Didn’t it Work?” Lessons From a  
50  
51 1136 Randomized Controlled Trial of a Web-based Personally Controlled Health  
52  
53  
54  
55  
56  
57  
58  
59  
60

- 1  
2  
3 1137 Management System for Adults with Asthma. *J Med Internet Res*  
4  
5 1138 2015;**17**:e283. doi:10.2196/jmir.4734  
6  
7  
8 1139 115 Kruse CS, Kothman K, Anerobi K, *et al.* Adoption Factors of the Electronic  
9  
10 1140 Health Record: A Systematic Review. *JMIR Med informatics* 2016;**4**:e19.  
11  
12 1141 doi:10.2196/medinform.5525  
13  
14  
15 1142 116 Greenhalgh T, Swinglehurst D, Stones R. Rethinking resistance to ‘big IT’: a  
16  
17 1143 sociological study of why and when healthcare staff do not use nationally  
18  
19 1144 mandated information and communication technologies. *Heal Serv Deliv Res*  
20  
21 1145 2014;**2**:1–86. doi:10.3310/hsdr02390  
22  
23  
24 1146 117 Ross J, Stevenson F, Lau R, *et al.* Factors that influence the implementation of  
25  
26 1147 e-health: a systematic review of systematic reviews (an update). *Implement Sci*  
27  
28 1148 2016;**11**:146. doi:10.1186/s13012-016-0510-7  
29  
30  
31 1149 118 Hennemann S, Beutel ME, Zwerenz R. Ready for eHealth? Health  
32  
33 1150 Professionals’ Acceptance and Adoption of eHealth Interventions in Inpatient  
34  
35 1151 Routine Care. *J Health Commun* 2017;**22**:274–84.  
36  
37 1152 doi:10.1080/10810730.2017.1284286  
38  
39  
40 1153 119 Harris M, Lawn SJ, Morello A, *et al.* Practice change in chronic conditions  
41  
42 1154 care: an appraisal of theories. *BMC Health Serv Res* 2017;**17**:170.  
43  
44 1155 doi:10.1186/s12913-017-2102-x  
45  
46  
47 1156 120 Ovretveit J, Leviton L, Parry G. Increasing the generalisability of improvement  
48  
49 1157 research with an improvement replication programme. *BMJ Qual Saf*  
50  
51 1158 2011;**20**:i87–91. doi:10.1136/bmjqs.2010.046342  
52  
53  
54 1159 121 Eikey E V, Reddy MC, Kuziemsky CE. Examining the role of collaboration in  
55  
56 1160 studies of health information technologies in biomedical informatics: A  
57  
58 1161 systematic review of 25 years of research. *J Biomed Inform* 2015;**57**:263–77.  
59  
60

- 1  
2  
3 1162 doi:10.1016/j.jbi.2015.08.006  
4  
5 1163 122 Girling C, Hind D, Arden MA, *et al.* Developing an implementation strategy  
6  
7 1164 for the use of objective adherence data in routine clinical practice: a case study  
8  
9 1165 in cystic fibrosis clinics. *Implement Sci* 2019;**14**:P9. doi:10.1186/s13012-019-  
10  
11 1166 0911-5  
12  
13 1167 123 Bevan A, Tahir M, Miller B, *et al.* P337 Easy Medicines for Burden Reduction  
14  
15 1168 and Care Enhancement: using real time adherence data to optimise inhaled  
16  
17 1169 therapies in adults with cystic fibrosis. The UK National EMBRACE  
18  
19 1170 programme. *J Cyst Fibros* 2020;**19**:S150. doi:10.1016/S1569-1993(20)30666-4  
20  
21  
22  
23 1171 124 Relton C, Torgerson D, O’Cathain A, *et al.* Rethinking pragmatic randomised  
24  
25 1172 controlled trials: introducing the ‘cohort multiple randomised controlled trial’  
26  
27 1173 design. *BMJ* 2010;**340**:c1066. doi:10.1136/bmj.c1066  
28  
29  
30 1174 125 Young-Afat DA, Verkooijen HAM, van Gils CH, *et al.* Staged-informed  
31  
32 1175 Consent in the Cohort Multiple Randomized Controlled Trial Design.  
33  
34 1176 *Epidemiology* 2016;**27**:389–92. doi:10.1097/EDE.0000000000000435  
35  
36  
37 1177 126 Retsch-Bogart GZ, Van Dalen JM, Marshall BC, *et al.* Highly effective cystic  
38  
39 1178 fibrosis clinical research teams: critical success factors. *J Gen Intern Med*  
40  
41 1179 2014;**29 Suppl 3**:S714-23. doi:10.1007/s11606-014-2896-8  
42  
43  
44 1180 127 Hibbard JH, Mahoney ER, Stockard J, *et al.* Development and testing of a short  
45  
46 1181 form of the patient activation measure. *Health Serv Res* 2005;**40**:1918–30.  
47  
48 1182 doi:10.1111/j.1475-6773.2005.00438.x  
49  
50  
51 1183 128 Verplanken BAS, Ell OR, Orbell S. Reflections on past behavior: A self-report  
52  
53 1184 index of habit strength. *J Appl Soc Psychol* 2003;**33**:1313–30.  
54  
55 1185 doi:10.1111/j.1559-1816.2003.tb01951.x  
56  
57  
58 1186  
59  
60

1  
2  
3 1187  
4  
5 1188 ...  
6  
7  
8 1189  
9  
10 1190  
11  
12  
13 1191  
14  
15  
16  
17  
18  
19  
20  
21  
22  
23  
24  
25  
26  
27  
28  
29  
30  
31  
32  
33  
34  
35  
36  
37  
38  
39  
40  
41  
42  
43  
44  
45  
46  
47  
48  
49  
50  
51  
52  
53  
54  
55  
56  
57  
58  
59  
60

For peer review only



1192 **Tables**1193 **Table 1 - Quantitative data contributing to the understanding of**  
1194 **logic model constructs**

1195

| #                 | Logic model column / construct       | Quantitative                                                                                                                                                                                                                                                |
|-------------------|--------------------------------------|-------------------------------------------------------------------------------------------------------------------------------------------------------------------------------------------------------------------------------------------------------------|
| <b>INPUTS</b>     |                                      |                                                                                                                                                                                                                                                             |
| 3                 | Prescription data                    | CFHH; problems documented in implementation log.                                                                                                                                                                                                            |
| 7                 | COM-BMQ questionnaire responses      | Capability Opportunity Motivation Behaviour Beliefs Questionnaire (COM-BMQ), incorporating the Beliefs about Medicines Questionnaire (Nebuliser adherence)[54], one additional belief item, one intention item, one confidence item, and a list of barriers |
| 9                 | Interventionist training programme   | Structured questionnaire on interventionist confidence after training programme.                                                                                                                                                                            |
| 11                | Competency/Fidelity assessment       | Structured instrument for the assessment of interventionist competence.                                                                                                                                                                                     |
| <b>ENGAGEMENT</b> |                                      |                                                                                                                                                                                                                                                             |
| 13                | Clinicians accessing adherence data* | CFHH click analytics.                                                                                                                                                                                                                                       |
| 14                | Adherence data tracking              | CFHH click analytics.                                                                                                                                                                                                                                       |
| 15                | Participant accessing CFHealthHub    | CFHH click analytics.                                                                                                                                                                                                                                       |

|                                                                   |                                                                            |                                                             |
|-------------------------------------------------------------------|----------------------------------------------------------------------------|-------------------------------------------------------------|
| 17                                                                | CFHealthHub Intervention sessions delivered according to Manual (Fidelity) | Project-specific structured fidelity assessment instrument. |
| 18                                                                | Initial session, and then review at each clinic visit                      | CFHH click analytics.                                       |
| <b>ACTIVITIES</b>                                                 |                                                                            |                                                             |
| <i>Intervention components for all participants</i>               |                                                                            |                                                             |
| 20                                                                | Self-monitoring adherence                                                  | CFHH click analytics.                                       |
| 21                                                                | Tailored education about treatment                                         | CFHH click analytics.                                       |
| 22                                                                | Tailored patient stories (videos)                                          | CFHH click analytics.                                       |
| <i>Intervention components for those with adequate motivation</i> |                                                                            |                                                             |
| 23                                                                | Personalised goal-setting                                                  | CFHH click analytics.                                       |
| 24                                                                | Goal review                                                                | CFHH click analytics.                                       |
| 25                                                                | Personalised action plan                                                   | CFHH click analytics.                                       |
| 26                                                                | Tailored problem-solving                                                   | CFHH click analytics.                                       |
| <b>IMMEDIATE OUTCOMES</b>                                         |                                                                            |                                                             |
| <i>For all participants</i>                                       |                                                                            |                                                             |

|    |    |                                 |
|----|----|---------------------------------|
| 1  |    |                                 |
| 2  |    |                                 |
| 3  |    |                                 |
| 4  | 28 | Acute awareness of adherence /  |
| 5  |    | increased Motivation            |
| 6  |    |                                 |
| 7  |    |                                 |
| 8  |    |                                 |
| 9  |    |                                 |
| 10 |    |                                 |
| 11 | 29 | Increased necessity and         |
| 12 |    | decreased concern               |
| 13 |    |                                 |
| 14 |    |                                 |
| 15 | 30 | Increased self-efficacy /       |
| 16 |    | Motivation                      |
| 17 |    |                                 |
| 18 |    |                                 |
| 19 |    |                                 |
| 20 |    |                                 |
| 21 |    | <i>For those with adequate</i>  |
| 22 |    | <i>motivation</i>               |
| 23 |    |                                 |
| 24 |    |                                 |
| 25 | 31 | Increased self-efficacy/        |
| 26 |    | Motivation                      |
| 27 |    |                                 |
| 28 |    |                                 |
| 29 |    |                                 |
| 30 | 32 | Increased habit / reduced chaos |
| 31 |    |                                 |
| 32 |    |                                 |
| 33 |    |                                 |
| 34 |    |                                 |
| 35 |    |                                 |
| 36 |    |                                 |
| 37 |    |                                 |
| 38 |    |                                 |
| 39 |    |                                 |
| 40 |    |                                 |
| 41 |    |                                 |
| 42 |    |                                 |
| 43 |    |                                 |
| 44 |    |                                 |
| 45 |    |                                 |
| 46 | 33 | Reduced barriers                |
| 47 |    |                                 |
| 48 |    |                                 |
| 49 |    |                                 |
| 50 |    |                                 |
| 51 |    |                                 |
| 52 |    |                                 |
| 53 |    |                                 |
| 54 |    |                                 |
| 55 |    |                                 |
| 56 |    | <b>INTERMEDIATE</b>             |
| 57 |    | <b>OUTCOMES</b>                 |
| 58 |    |                                 |
| 59 |    |                                 |
| 60 |    |                                 |

|    |                     |                       |
|----|---------------------|-----------------------|
| 35 | Increased adherence | Nebuliser data (CFHH) |
|----|---------------------|-----------------------|

1196

1197

1198

For peer review only

1  
2  
3  
4  
5  
6  
7  
8  
9  
10  
11  
12  
13  
14  
15  
16  
17  
18  
19  
20  
21  
22  
23  
24  
25  
26  
27  
28  
29  
30  
31  
32  
33  
34  
35  
36  
37  
38  
39  
40  
41  
42  
43  
44  
45  
46  
47  
48  
49  
50  
51  
52  
53  
54  
55  
56  
57  
58  
59  
60

1  
2  
3  
4 1199 **Figures**

5 1200

6  
7  
8 1201 **Figure 1 - Logic model**

9  
10 1202

11  
12 1203 **Figure 2 - The digital platform**

13  
14 1204

15  
16  
17 1205 **Figure 3 – Objective versus subjective adherence at 5 (+/- 1) months stratified**  
18 **by adherence**

19 1206  
20  
21 1207  
22  
23

24  
25 1208 **Additional files**

26 1209

27  
28 1210 **Additional file 01 – Participant adherence run charts for fourteen case studies**  
29 1211

30  
31 1212 **Additional file 02 – Study protocol and interview guides**

32 1213

33 1214

34 1215 **Additional file 03 – Quantitative results from process evaluation**

35 1216

36  
37  
38 1217 **Additional file 04 – Joint display table**

39 1218

40  
41 1219 **Additional file 05 – Case-ordered descriptive matrix for fourteen case studies**

42 1220

43  
44 1221 **Additional file 06 – Statistical methods, outcomes and estimation**

45 1222

46  
47 1223 **Additional file 07 – Changes to intervention procedures**

48  
49  
50  
51  
52  
53  
54  
55  
56  
57  
58  
59  
60

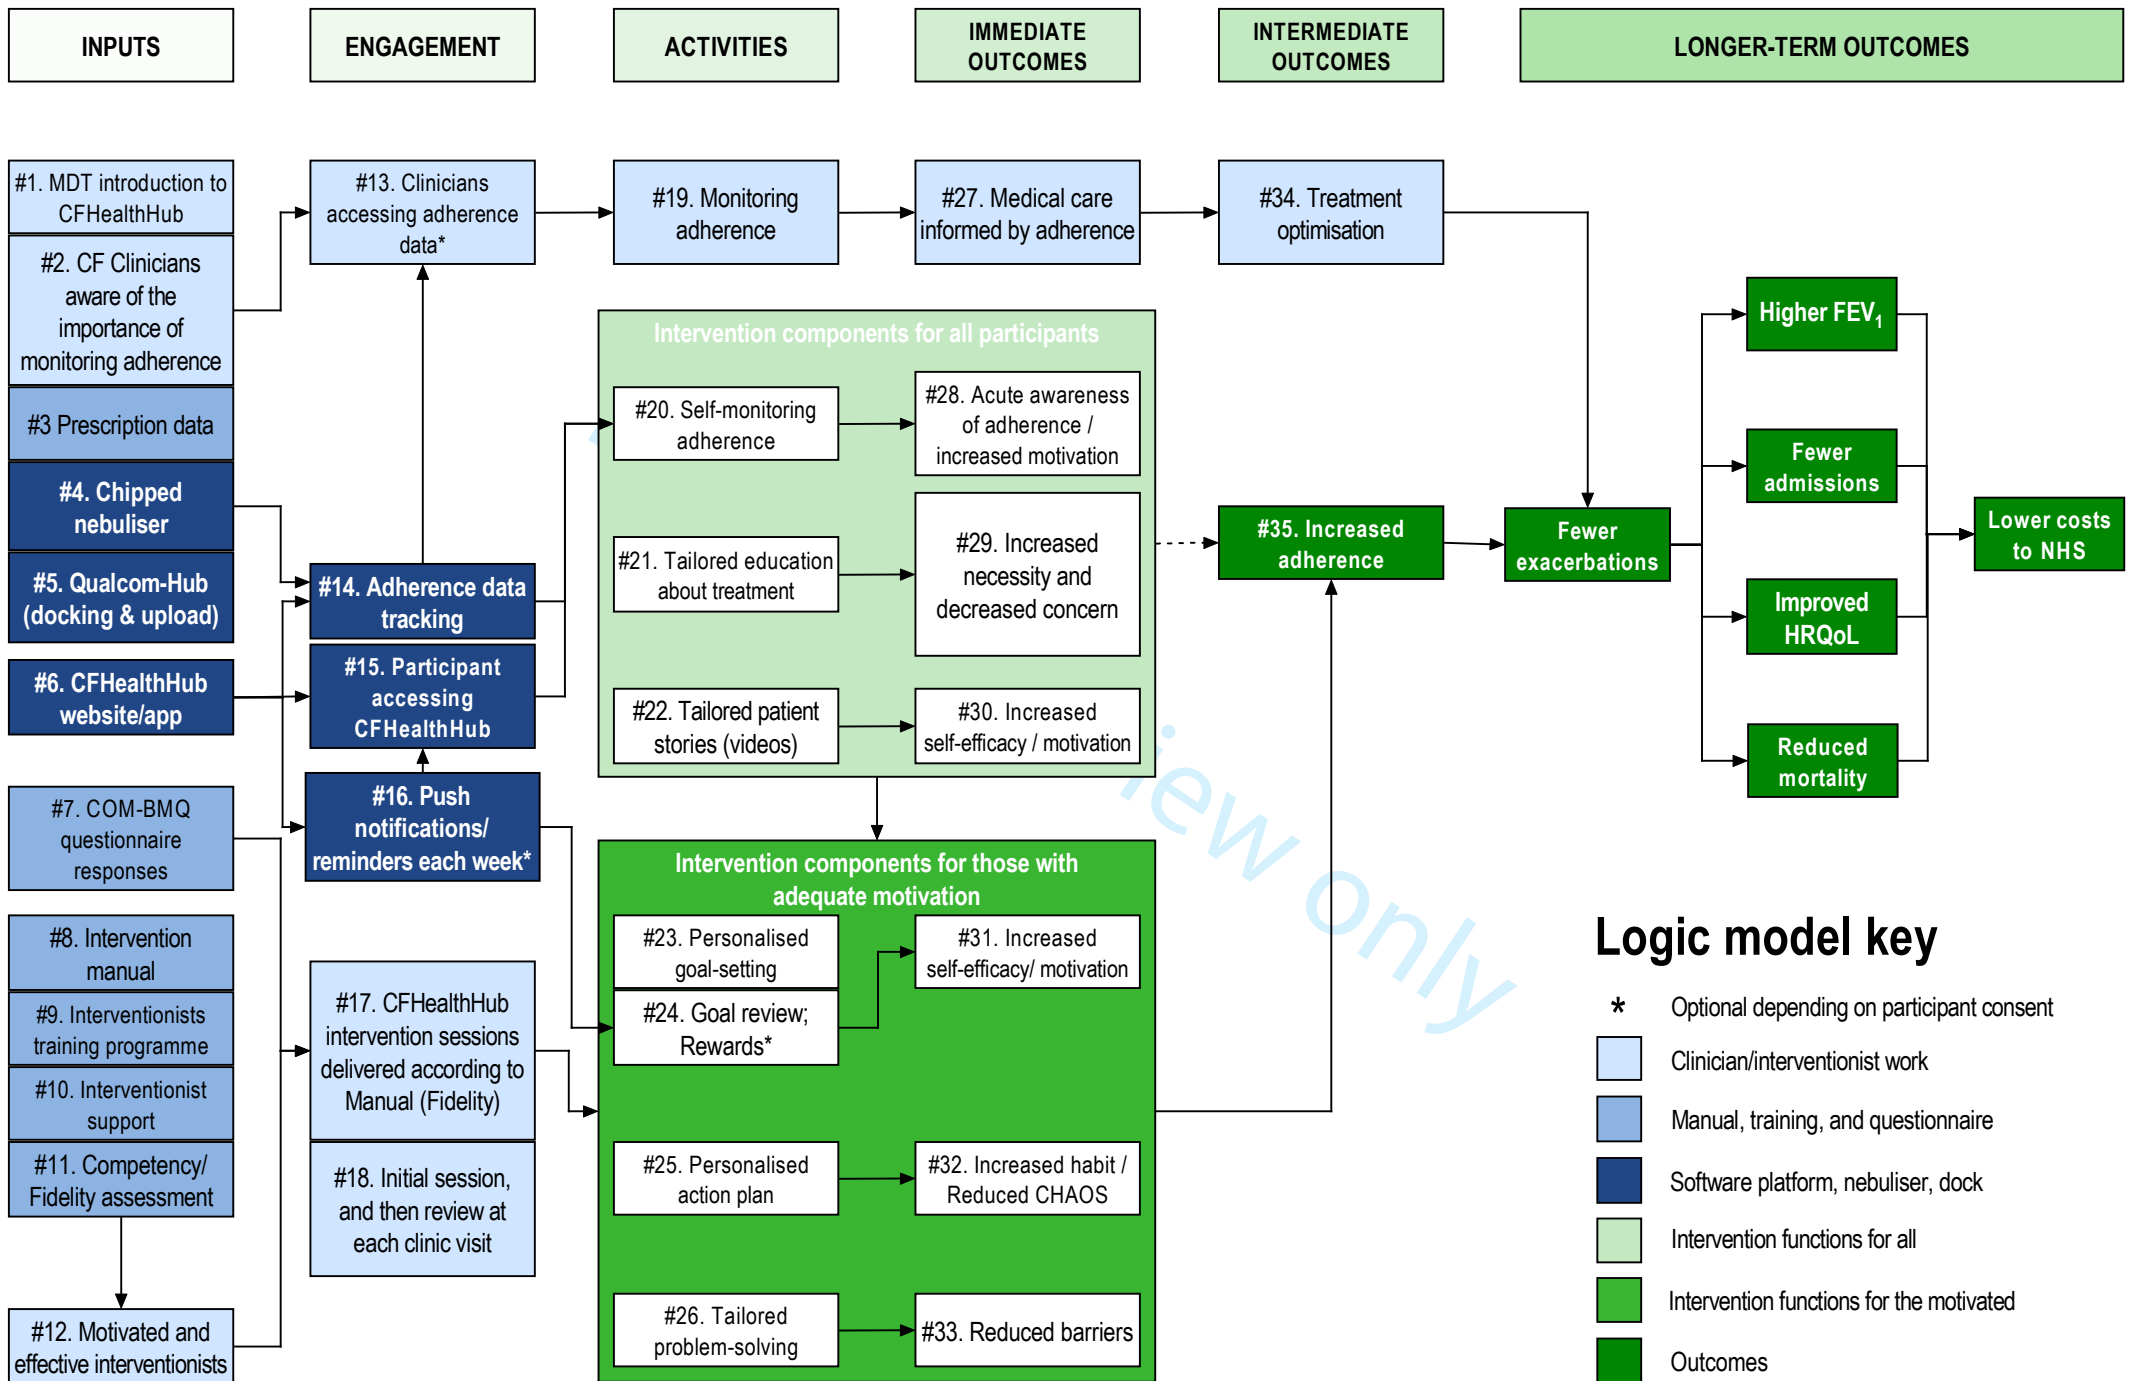

1  
2  
3  
4  
5  
6  
7  
8  
9  
10  
11  
12  
13  
14  
15  
16  
17  
18  
19  
20  
21  
22  
23  
24  
25  
26  
27  
28  
29  
30  
31  
32  
33  
34  
35  
36  
37  
38  
39  
40  
41  
42  
43  
44  
45  
46  
47  
48  
49  
50  
51  
52  
53  
54  
55  
56  
57  
58  
59  
60



The digital platform

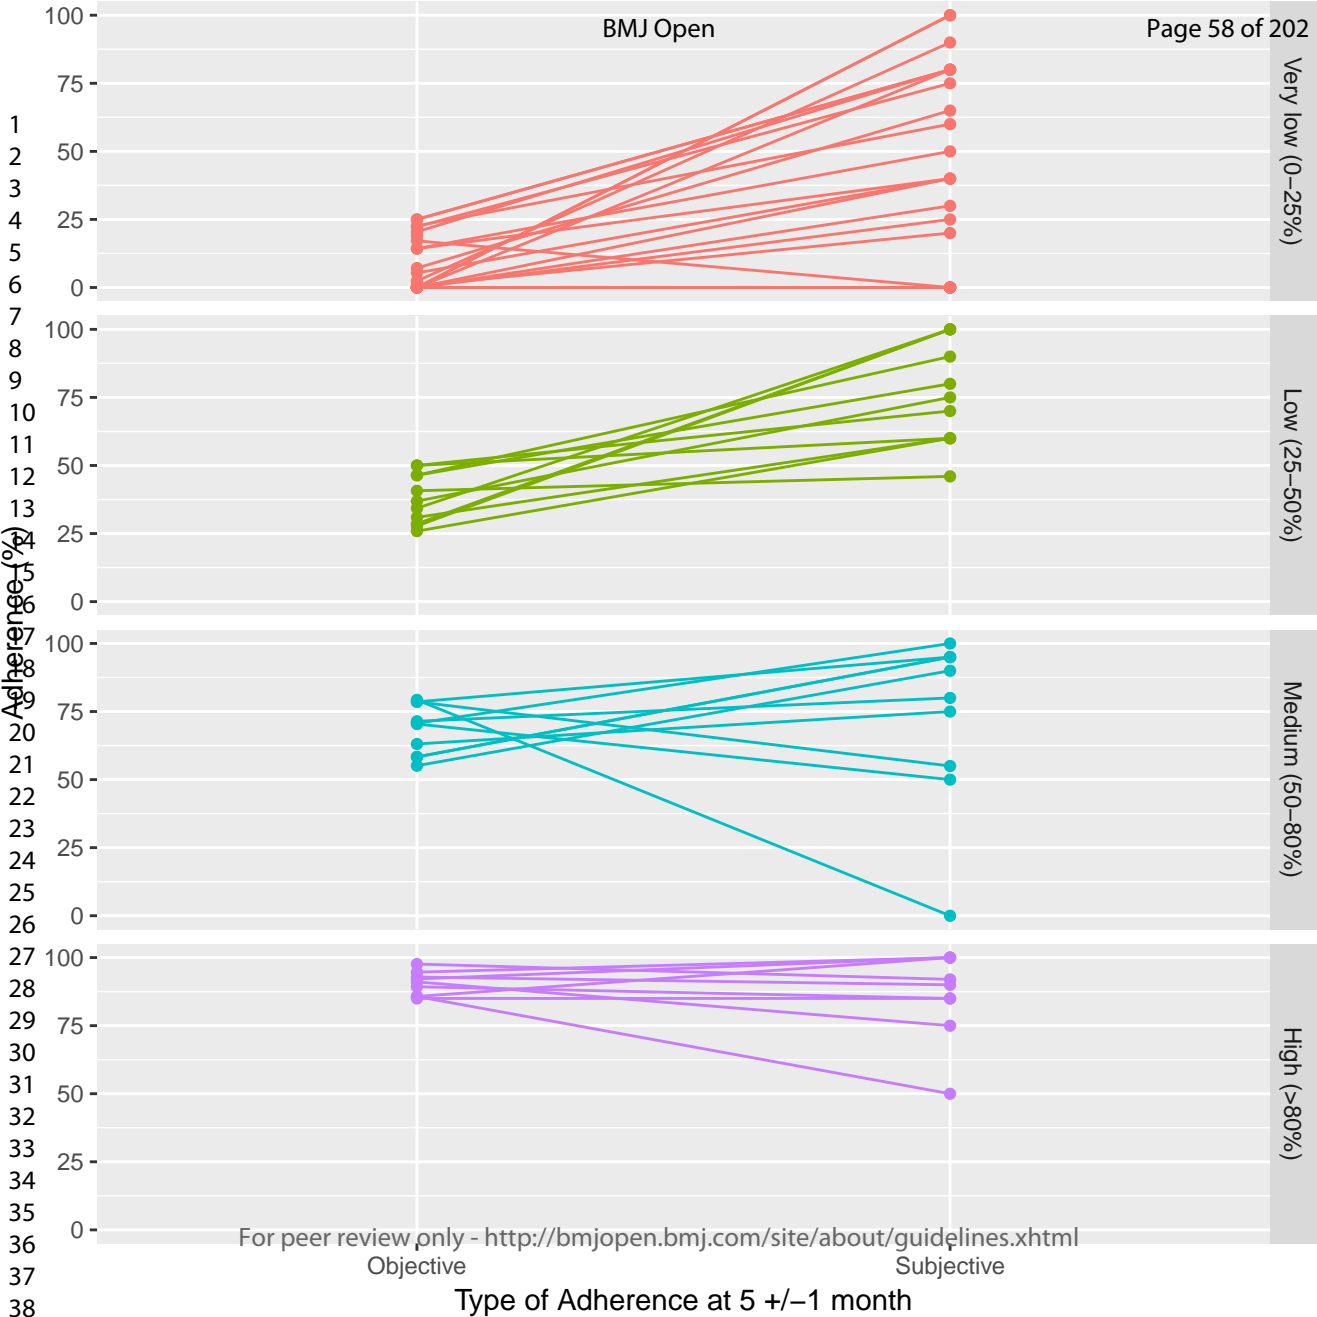

For peer review only - <http://bmjopen.bmj.com/site/about/guidelines.xhtml>

Objective Subjective

Type of Adherence at 5 +/- 1 month



1  
2  
3  
4  
5  
6  
7  
8  
9  
10  
11  
12  
13  
14  
15  
16  
17  
18  
19  
20  
21  
22  
23  
24  
25  
26  
27  
28  
29  
30  
31  
32  
33  
34  
35  
36  
37  
38  
39  
40  
41  
42  
43  
44  
45  
46  
47  
48  
49  
50  
51  
52  
53  
54  
55  
56  
57  
58  
59  
60

R02/42  
motiv: 7(0)  
conf: 7(0)  
BMQn: 3.1(0.9)  
BMQc: 1.5(0)  
CHAOS:11(7)  
WD: Intv and Adh ~ Week 2  
Interview week 13

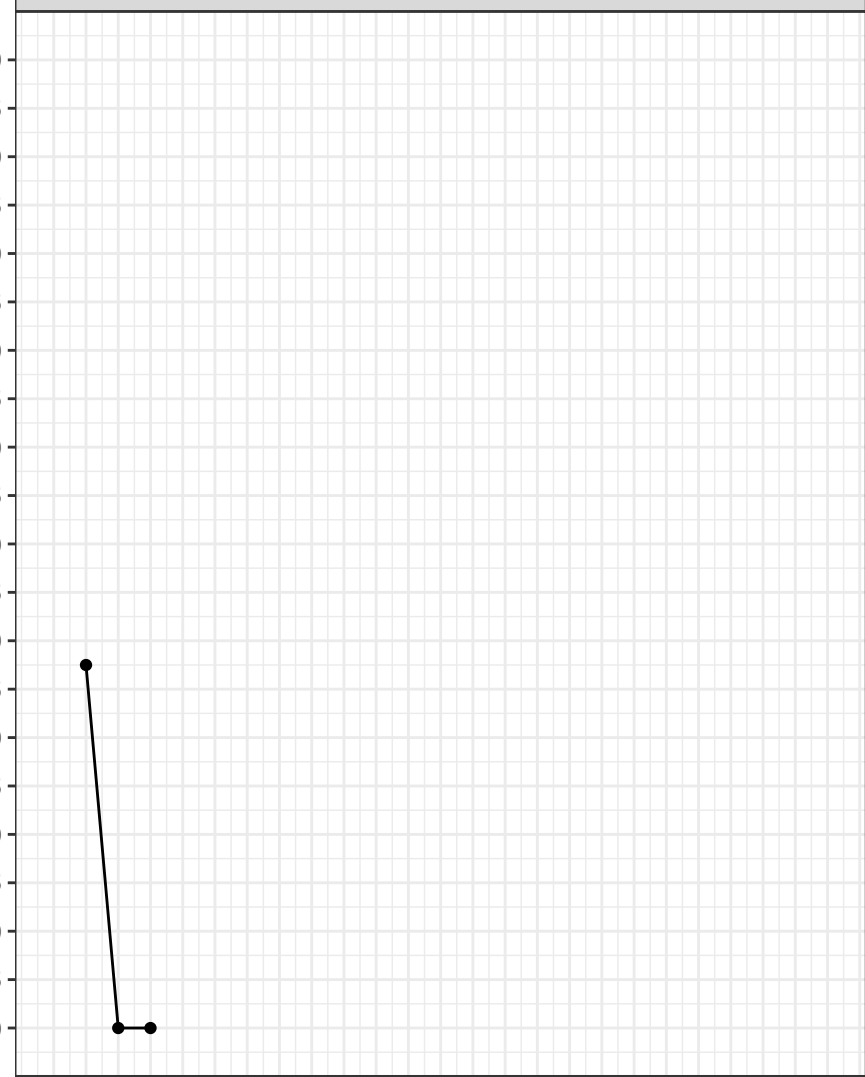

R02/07  
motiv: 7(0)  
conf: 7(0)  
BMQn: 3.1(0.2)  
BMQc: 2.6(-0.2)  
CHAOS: 10(-5)

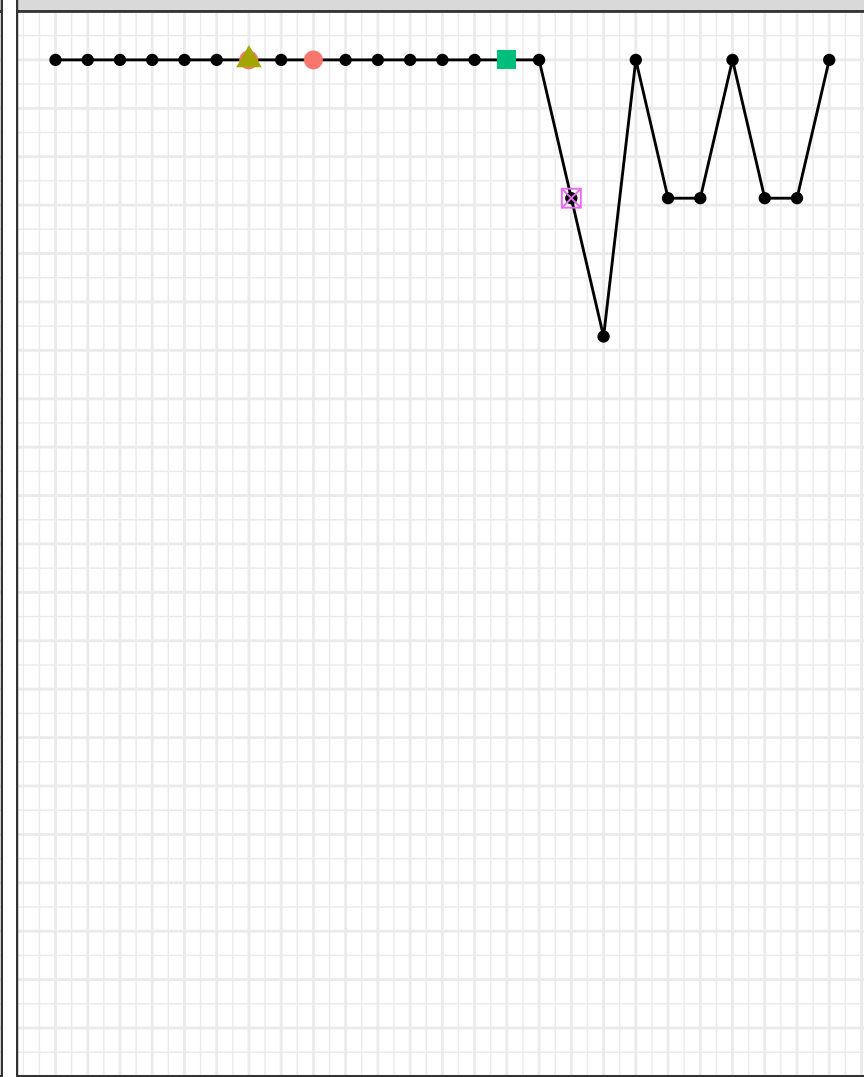

BMJ Open  
R02/12  
motiv: 7(0)  
conf: 4(0)  
BMQn: 3.1(-0.1)  
BMQc: 3.1(-0.7)  
CHAOS: 10(-2)

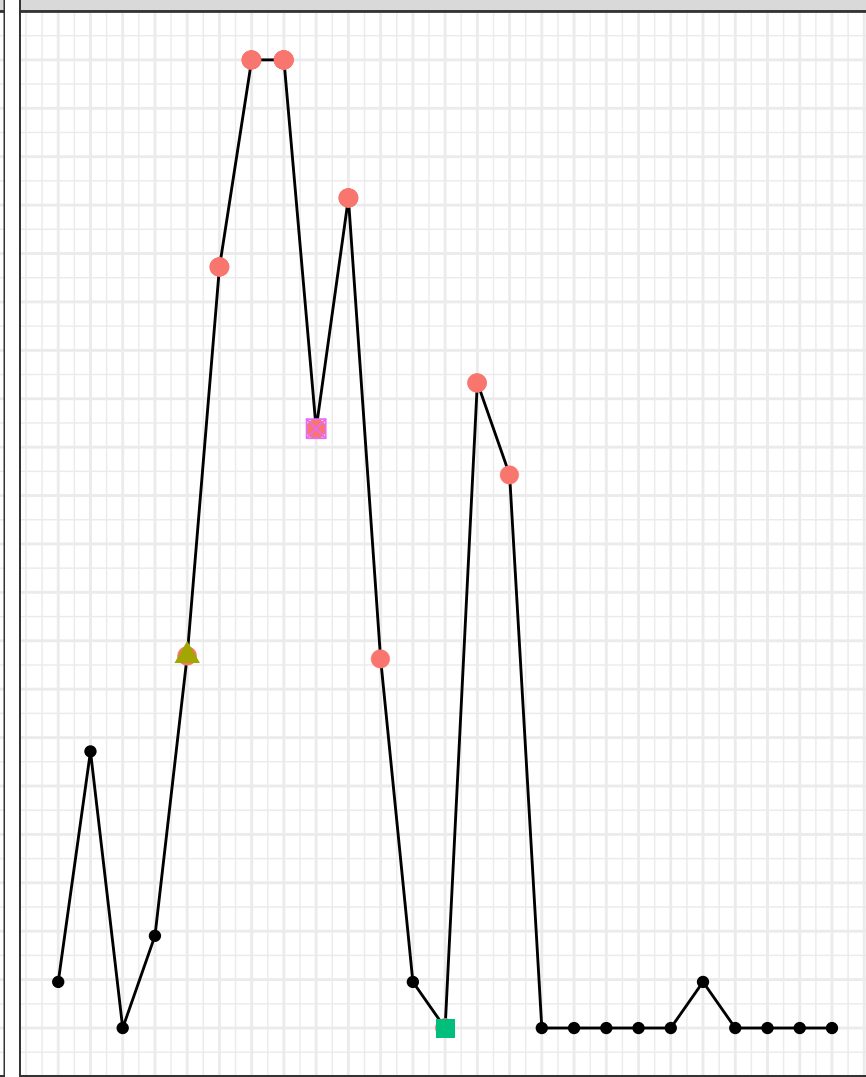

R02/52  
motiv: 7(0)  
conf: 7(0)  
BMQn: 4(0.3)  
BMQc: 1.7(-0.2)  
CHAOS: 9(-1)

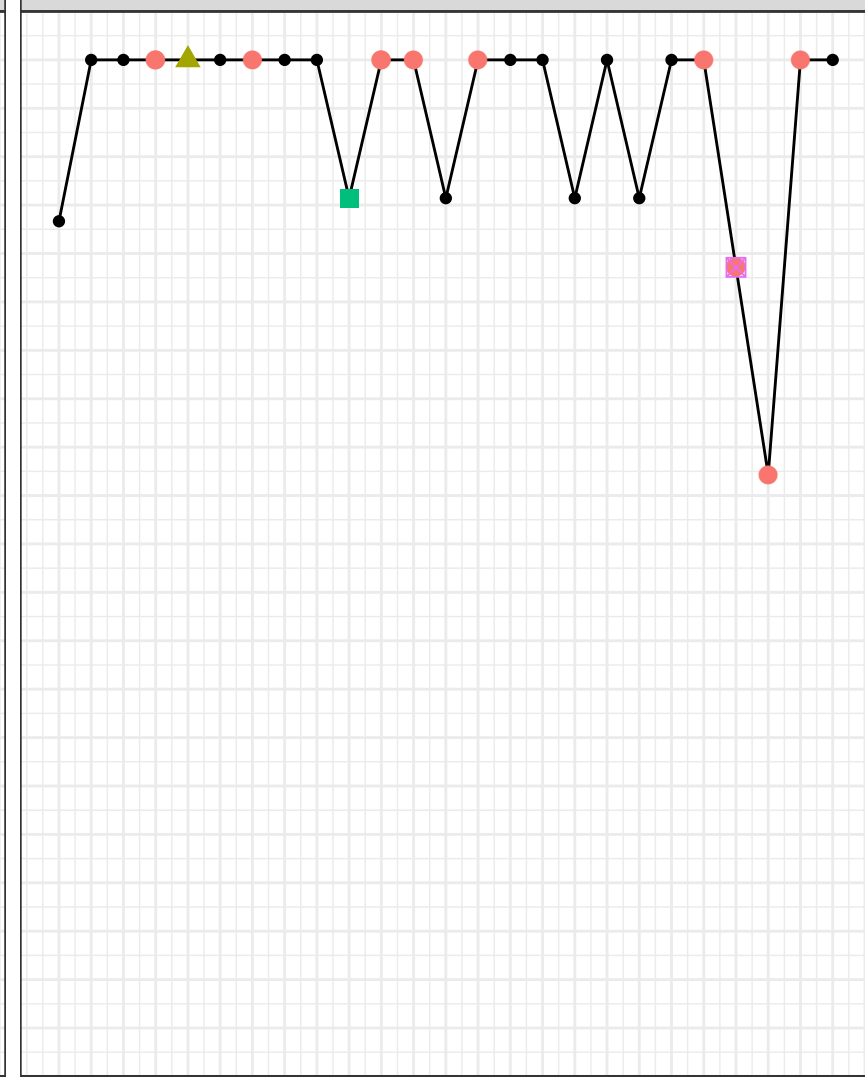

R02/02  
motiv: 7(0)  
conf: 7(0)  
BMQn: 3.3(0.1)  
BMQc: 1.5(-0.5)  
CHAOS: 7(-1)  
WD: Intv and Adh Week 10

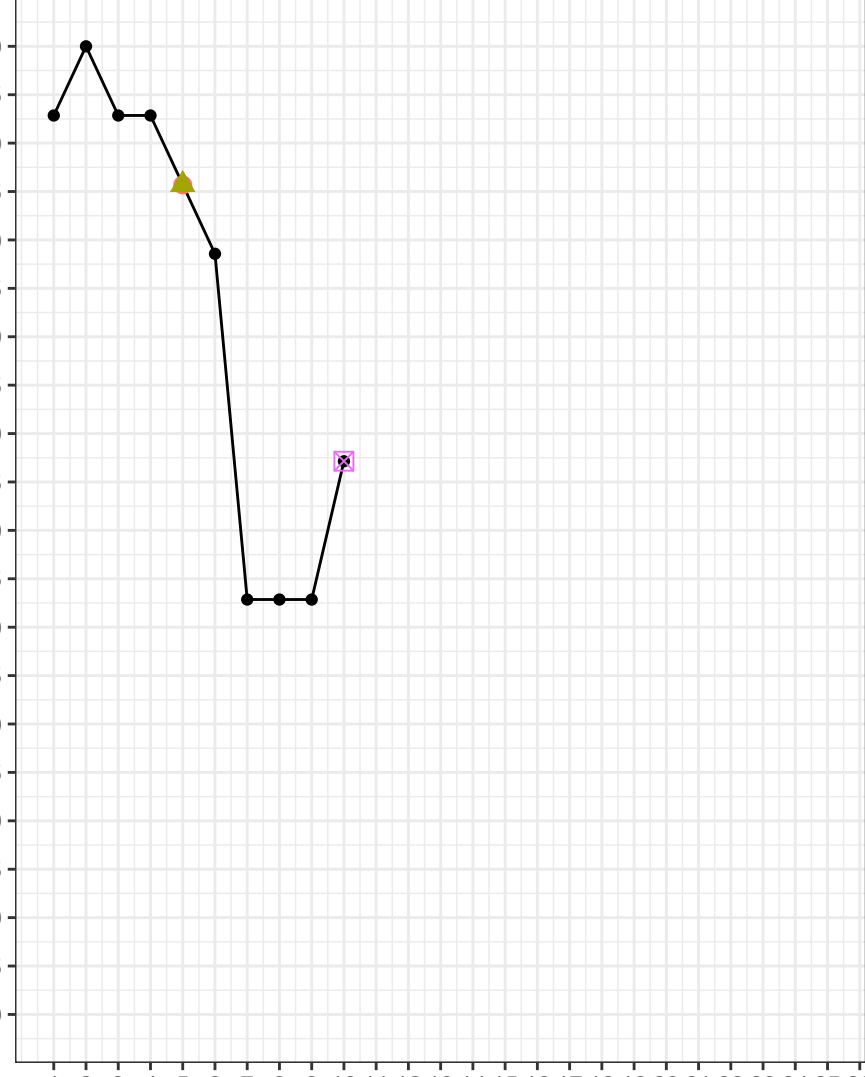

R02/03  
motiv: 1(NA)  
conf: 2(NA)  
BMQn: 2.7(NA)  
BMQc: 2.5(NA)  
CHAOS: 10(NA)  
WD: Intv and Adh Week 6  
Interview week 9

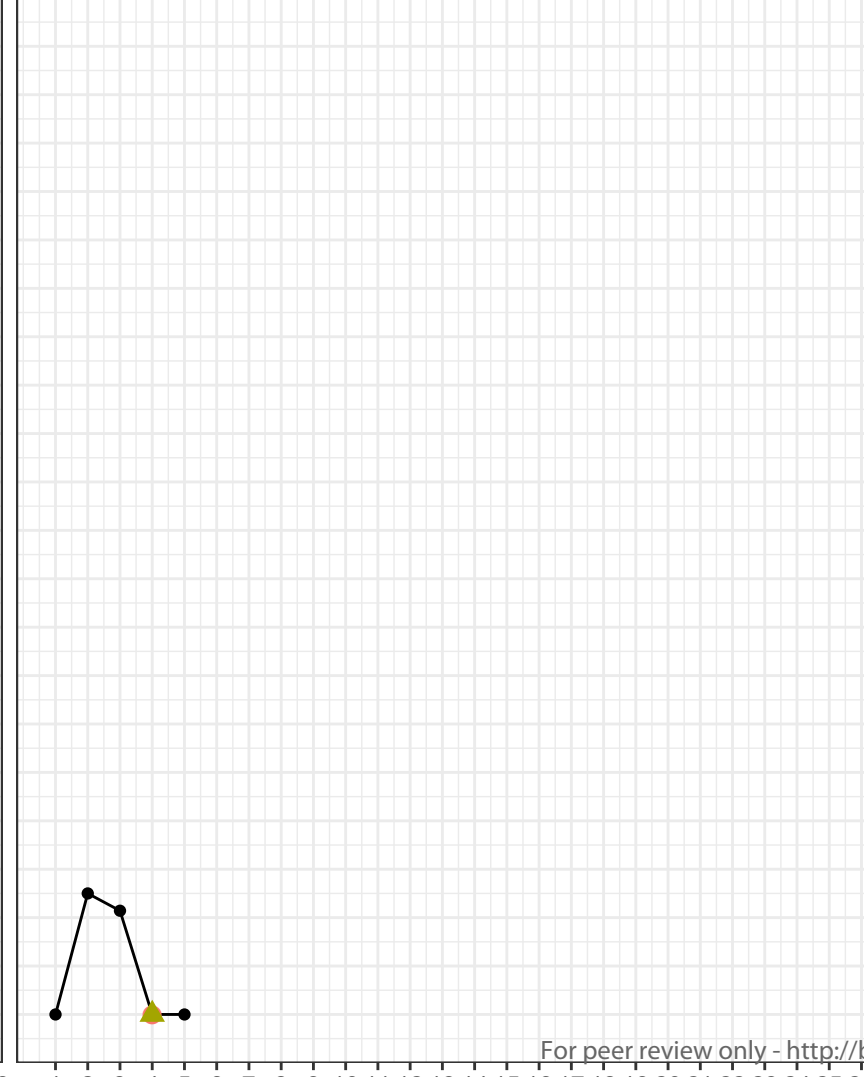

R01/44  
motiv: 7(0)  
conf: 5(-4)  
BMQn: 2.6(1.4)  
BMQc: 1.7(0.2)  
CHAOS: 18(-1)

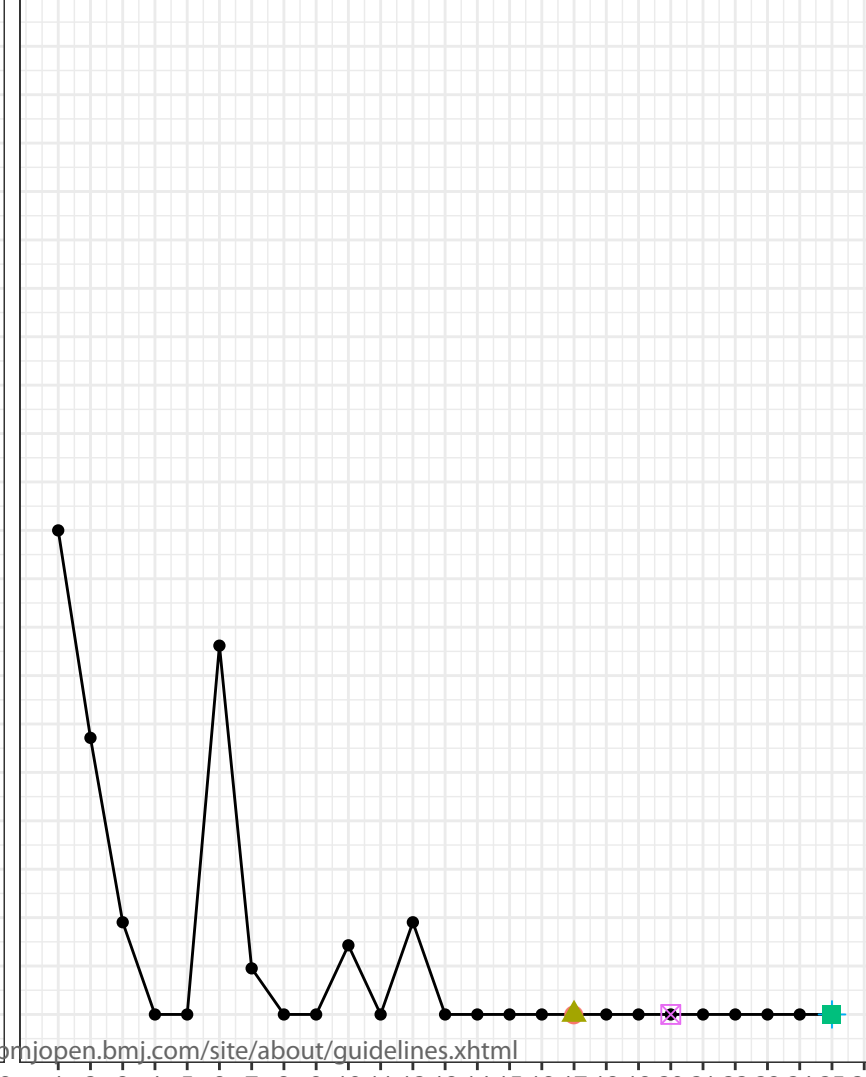

R01/48  
motiv: 7(0)  
conf: 6(0)  
BMQn: 2.7(0.9)  
BMQc: 2.9(-0.8)  
CHAOS: 11(0)  
Interview week 26

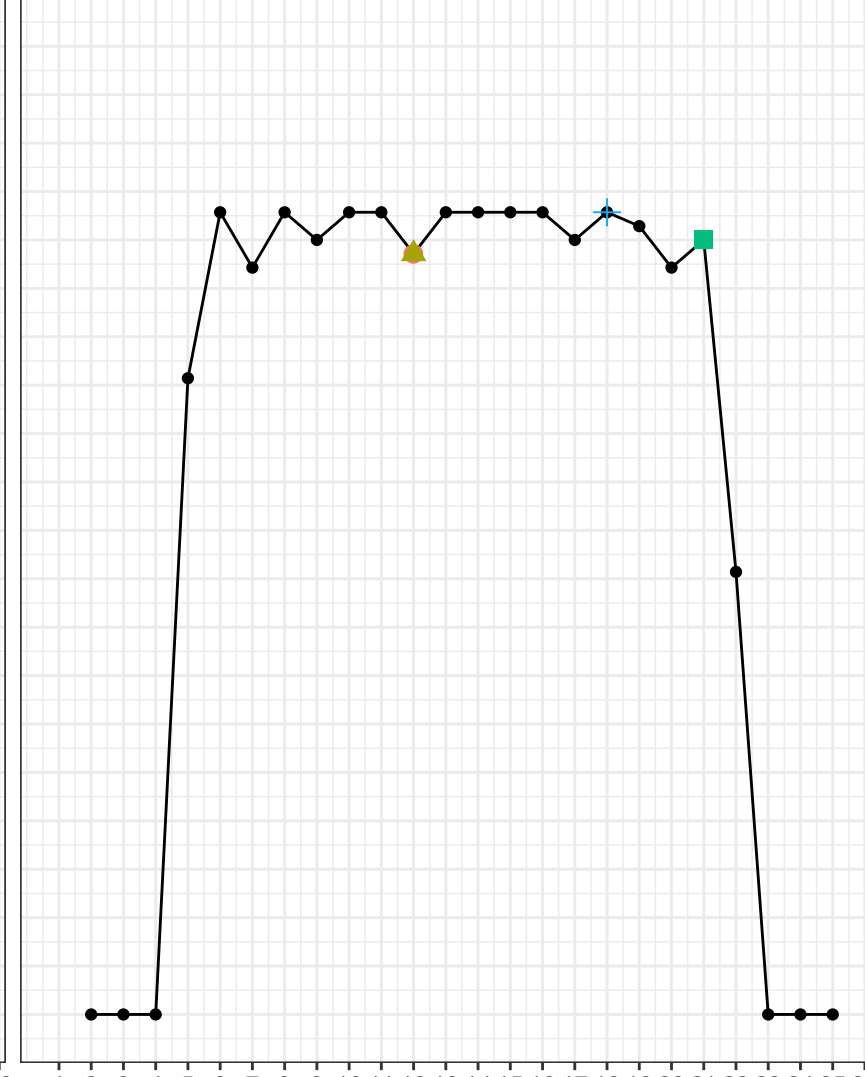

Study Event  
● CFHH session  
▲ Intervention  
■ Review  
+ Preparation  
⊠ Interview  
NA

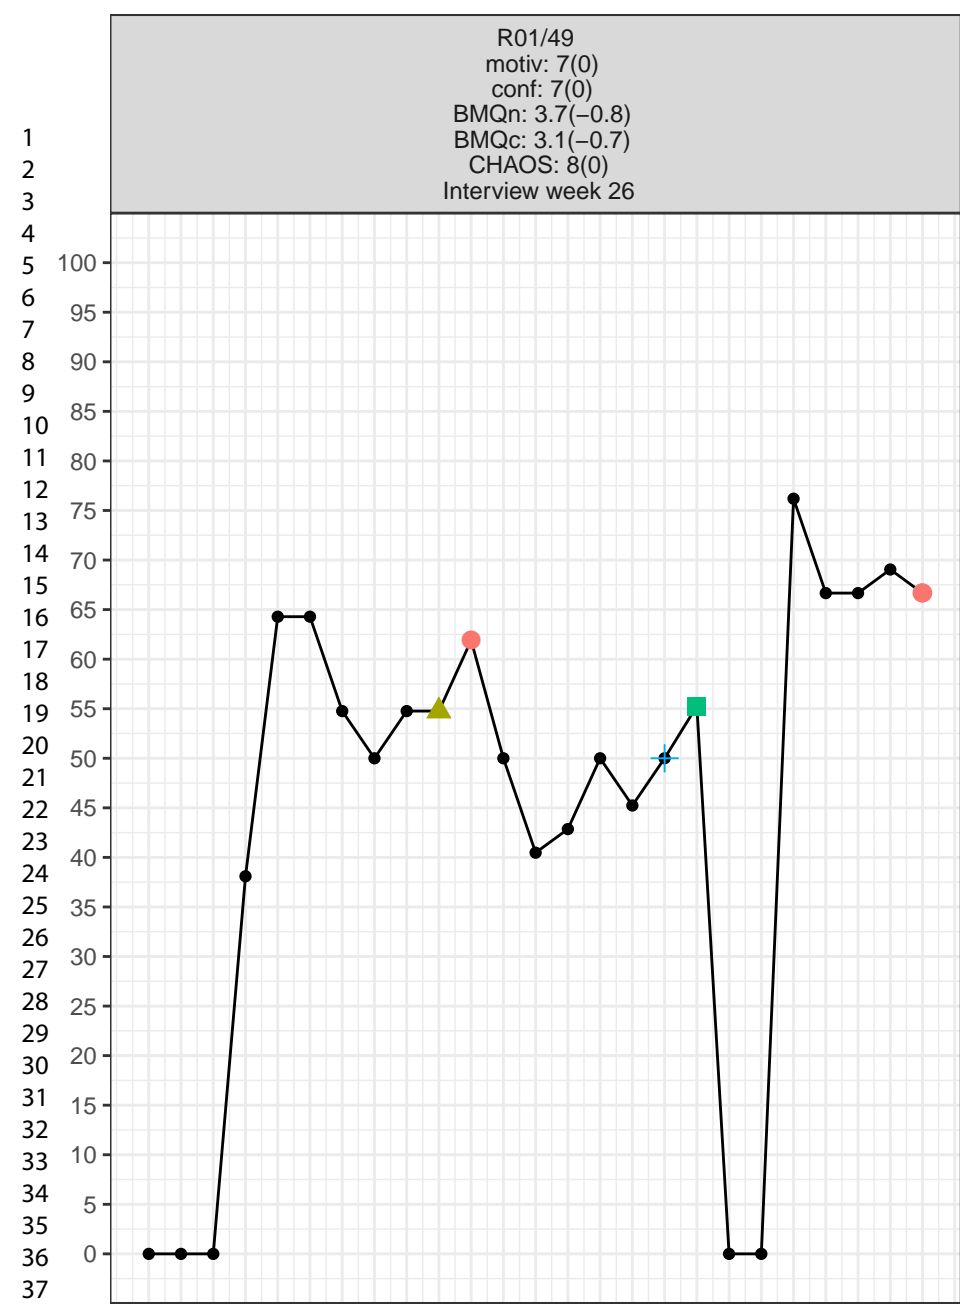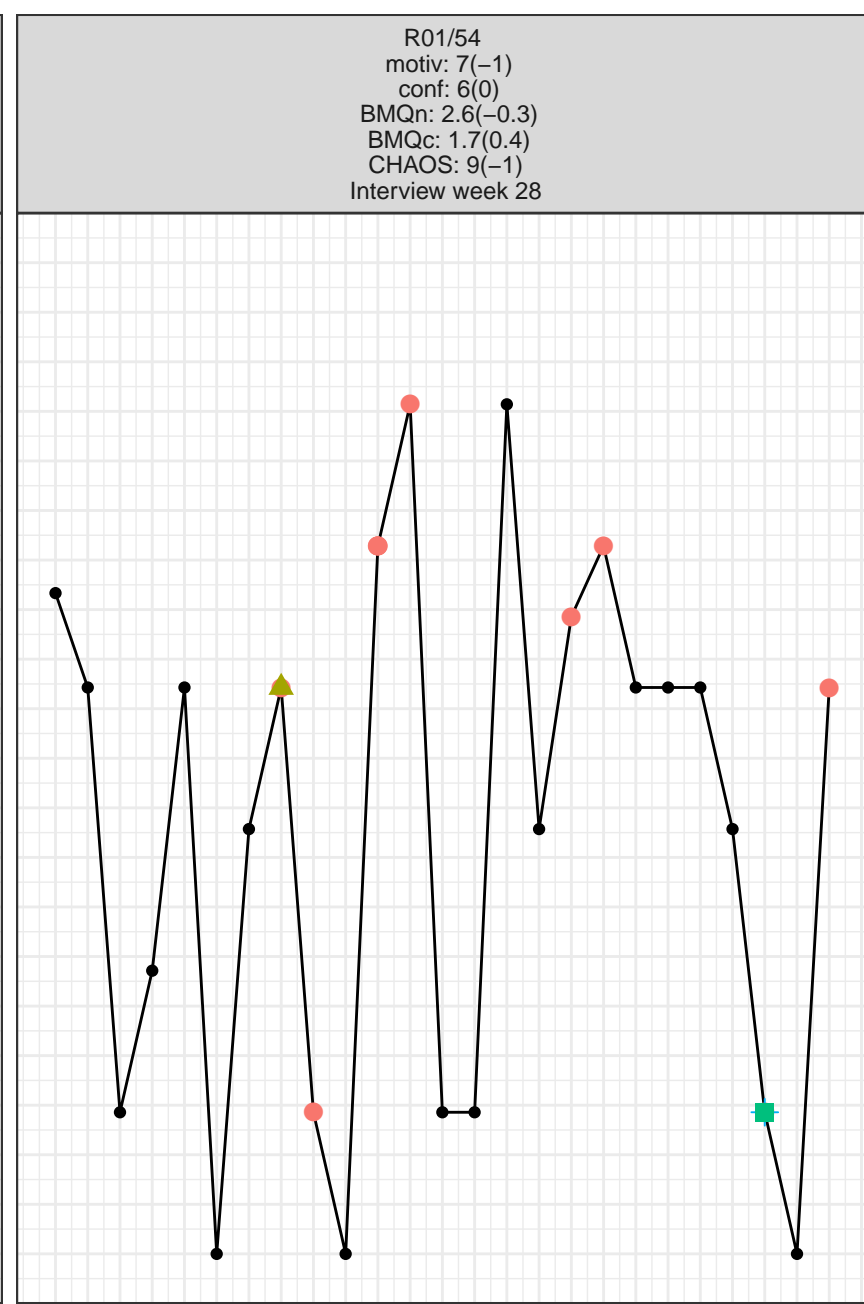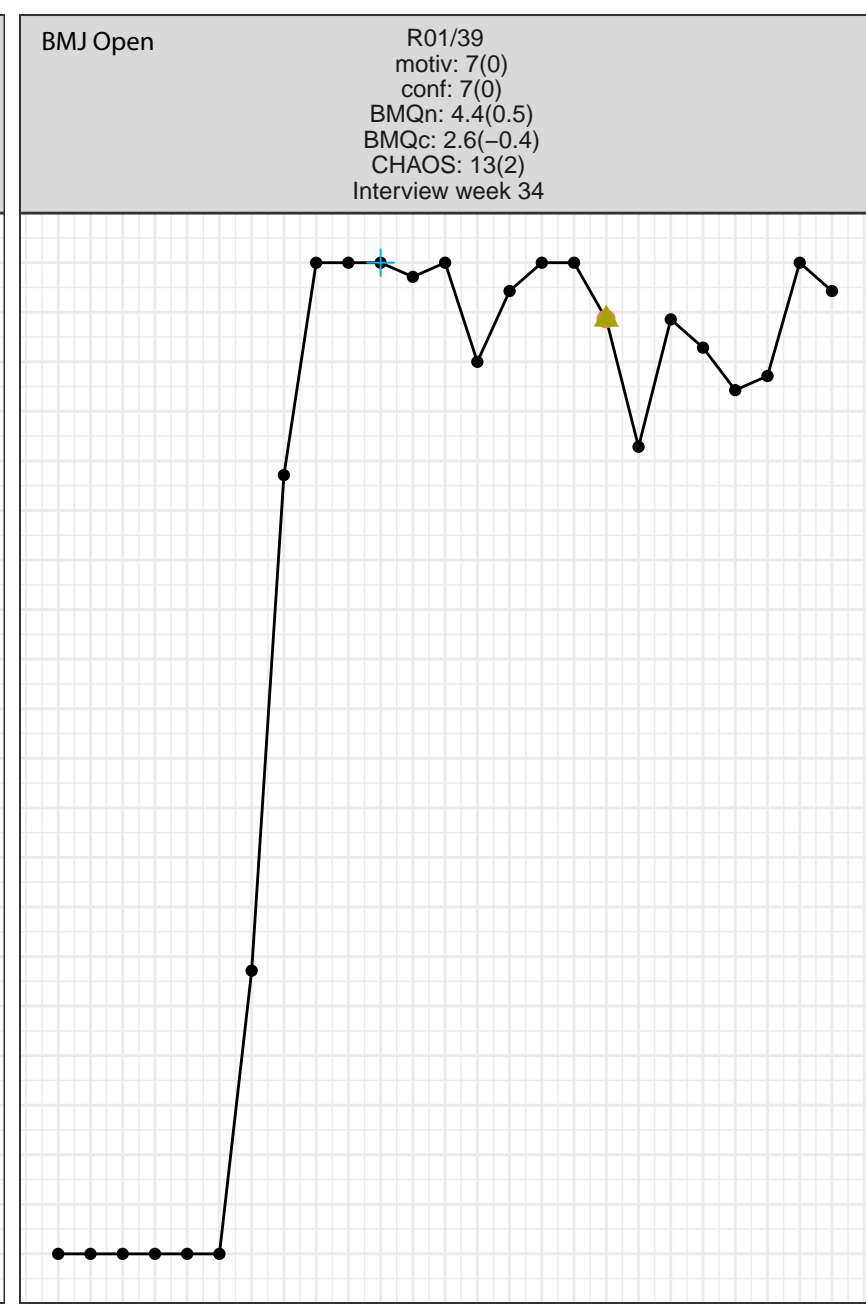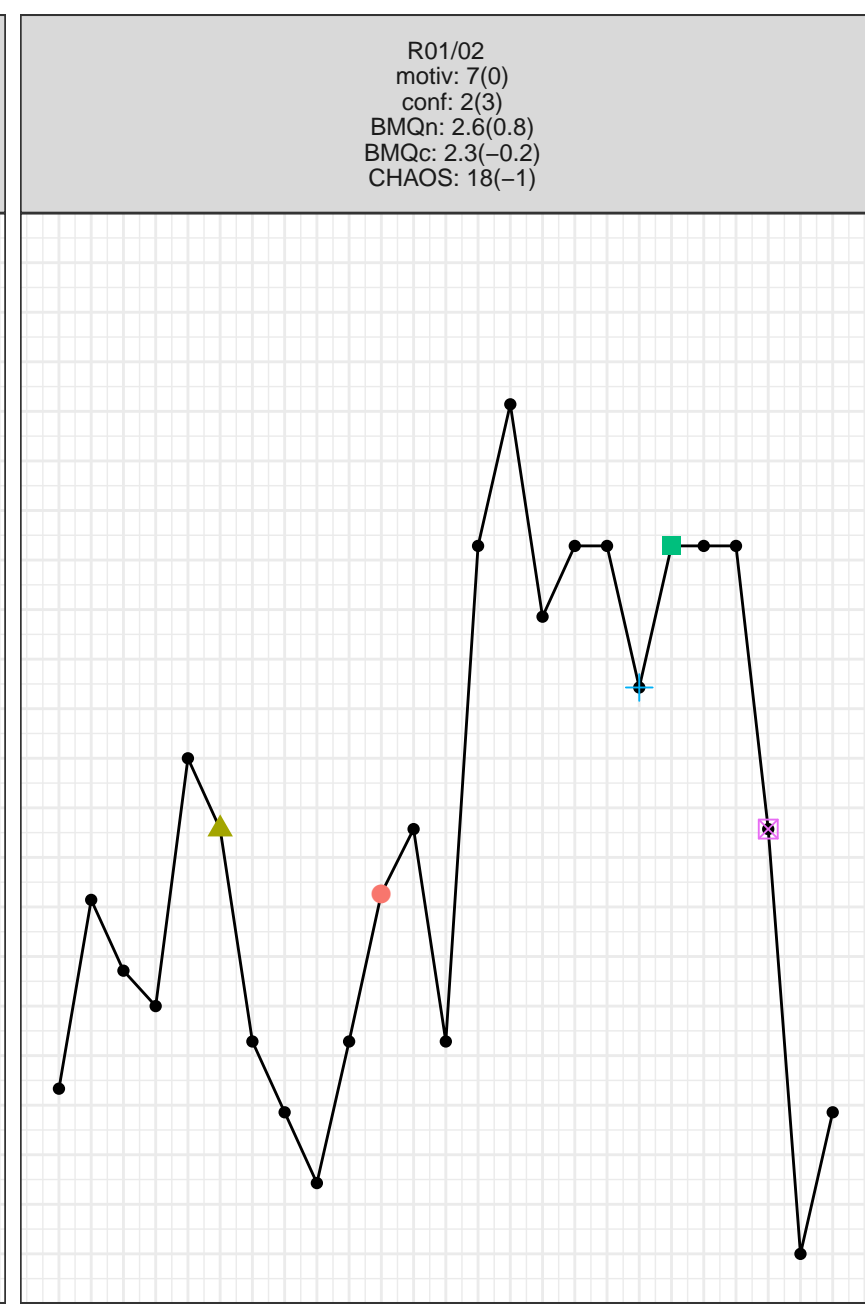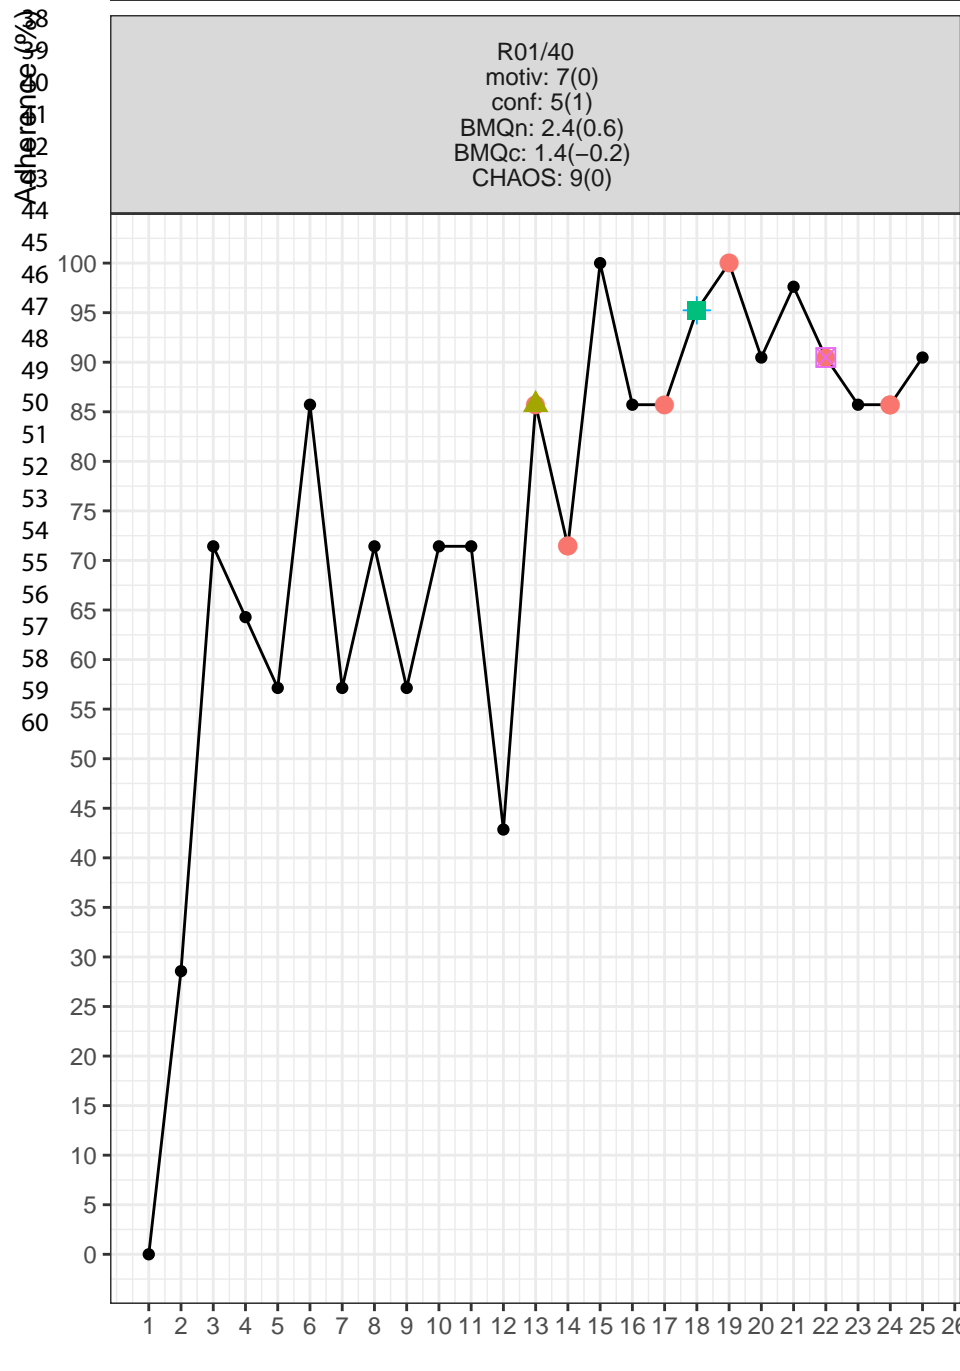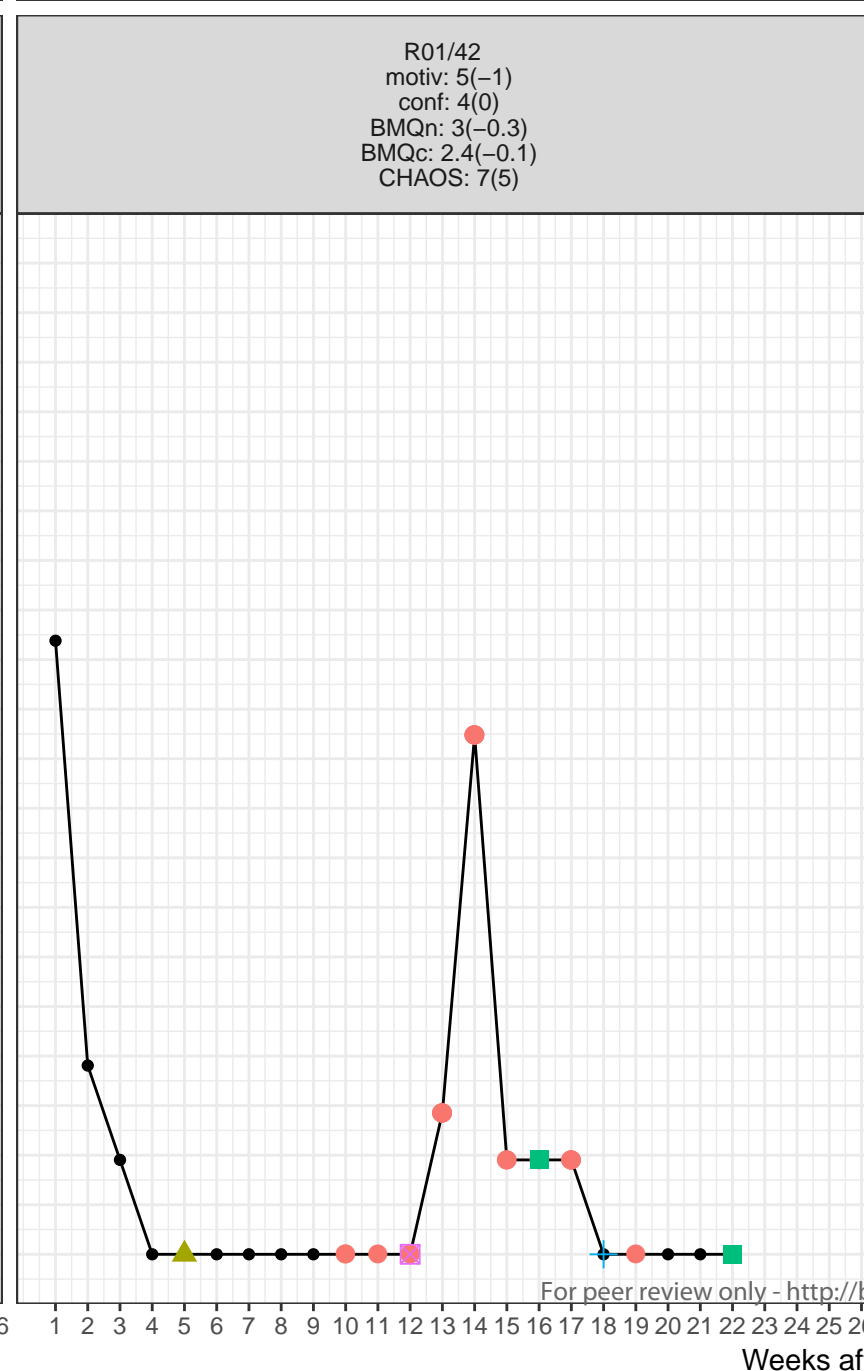

- Study Event**
- CFHH session
  - ▲ Intervention
  - Review
  - + Preparation
  - ⊠ Interview
  - NA

*ACtiF*

  
**National Institute for  
 Health Research**

Sheffield Teaching Hospitals   
 NHS Foundation Trust

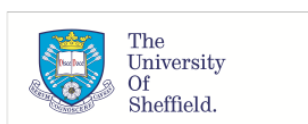

Clinical  
 Trials  
 Research  
 Unit.

**Sheffield  
 Hallam  
 University**

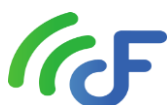

# Development and evaluation of an intervention to support Adherence to treatment in adults with Cystic Fibrosis

**A feasibility study comprised of an  
 external pilot randomised controlled trial  
 and process evaluation**

## RESEARCH PROTOCOL

V3.1 16Nov16

**Sheffield CTRU** J13-002

**IRAS** 199775

**ISRCTN** ISRCTN13076797

**Authorised by:** Martin Wildman

Alicia O'Cathain

## Funding

This project was funded by the Programme Grants for Applied Research programme (RP-PG-1212-20015) and will be published in full in the NIHR Journals Library. This research presents independent research commissioned by the NIHR. The views and opinions expressed by authors in this publication are those of the authors and do not necessarily reflect those of the NHS, the NIHR, MRC, CCF, NETSCC, the Health Technology Assessment programme or the Department of Health.

## Roles and responsibilities

### Names, affiliations, and roles of protocol contributors

The following all contributed to drafting elements throughout the protocol: Martin Wildman, Consultant Respiratory Medic; Marlene Hutchings, Physiotherapist (Sheffield Teaching Hospitals NHS Foundation Trust); Madelynne Arden, Professor of Health Psychology (Sheffield Hallam University); Alicia O’Cathain, Professor of Health Services Research; Sarah Drabble, Research Associate, Stephen Walters (Professor of Medical Statistics and Clinical Trials); Paul Tappenden, Reader in Health Economics; Daniel Beever, Research Associate and Patient Representative; Pauline Wheelan mHealth Applications Manager (University of Manchester); Judy Bradley, Professor of Physiotherapy and Health Services Research; Hannah Cantrill (Research Associate); Chin Maguire (Study Manager); and, Daniel Hind, Assistant Director, Sheffield Clinical Trials Research Unit (University of Sheffield). MW and MA are guarantors of the intervention description; SW is the guarantor of the statistical design and analysis plan; DH is the guarantor of other elements of the pilot trial; AO’C is guarantor for the qualitative research components.

### Sponsor

Sheffield Teaching Hospitals NHS Foundation Trust  
D Floor  
Clinical Research Office  
Royal Hallamshire Hospital  
Glossop Road  
Sheffield  
S10 2JF  
Tel: (0114) 2256424  
Fax: (0114)

### Role of study sponsor and funders

Neither the funder nor the sponsor have had any role in study design, data collection and analysis, decision to publish, or preparation of manuscripts.

## Key Contacts

### Study Manager

Chin Maguire  
 Clinical Trials Research Unit  
 The University of Sheffield  
 School of Health and Related Research  
 30 Regent Street  
 Sheffield  
 Sheffield  
 S1 4DA  
 Tel: (0114) 222 0717  
 Fax: (0114) 222 0870  
 e-mail: [c.maguire@sheffield.ac.uk](mailto:c.maguire@sheffield.ac.uk)

### Chief Investigator

Dr Martin Wildman  
 Adult CF Centre  
 Northern General Hospital  
 Herries Road  
 Sheffield  
 S5 7AU  
 Tel: (0114) 2715212  
 Fax: (0114) 222 0870  
 e-mail: [Martin.Wildman@sth.nhs.uk](mailto:Martin.Wildman@sth.nhs.uk)

## Composition, roles, and responsibilities

### Project Management Group

| Name                       | Role                              | Institution                                          |
|----------------------------|-----------------------------------|------------------------------------------------------|
| Dr Martin Wildman          | Chief Investigator                | Sheffield Teaching Hospitals<br>NHS Foundation Trust |
| Professor Alicia O'Cathain | Chief Investigator                | University of Sheffield                              |
| Dr Daniel Hind             | CTRU Assistant Director           | University of Sheffield                              |
| Chin Maguire               | Study Manager                     | University of Sheffield                              |
| Hannah Cantrill            | Research Assistant                | University of Sheffield                              |
| Helen Wakefield            | Trial Support Office              | University of Sheffield                              |
| Dan Beever                 | PPI Lead                          | University of Sheffield                              |
| Dr Sarah Drabble           | Qualitative Researcher            | University of Sheffield                              |
| Professor Maddy Arden      | Professor of Health<br>Psychology | Sheffield Hallam University                          |
| Marlene Hutchings          | Research Physiotherapist          | Sheffield Teaching Hospitals<br>NHS Foundation Trust |
| Professor Judy Bradley     | Professor in Physiotherapy        | Queens University Belfast                            |

## Independent Project Steering Committee

| Name                       | Role                           | Institution                                           |
|----------------------------|--------------------------------|-------------------------------------------------------|
| Professor Kathy Rowan      | Independent Chair              | London School of Hygiene and Tropical Medicine        |
| Professor Sarah Garner     | Independent member             | The National Institute for Health and Care Excellence |
| Professor David Torgerson  | Independent Member             | University of York                                    |
| Dr Lisa Hampson            | Independent Statistician       | Lancaster University                                  |
| Dominic Kavanagh           | PPI Representative             |                                                       |
| Dr Martin Wildman          | Chief Investigator             | Sheffield Teaching Hospitals<br>NHS Foundation Trust  |
| Professor Alicia O'Cathain | Chief Investigator             | University of Sheffield                               |
| Dr Daniel Hind             | CTRU Assistant Director        | University of Sheffield                               |
| Chin Maguire               | Study Manager                  | University of Sheffield                               |
| Professor Maddy Arden      | Professor of Health Psychology | Sheffield Hallam University                           |

## Contents

|                                                                           |    |
|---------------------------------------------------------------------------|----|
| Funding .....                                                             | 2  |
| Names, affiliations, and roles of protocol contributors .....             | 2  |
| Sponsor .....                                                             | 2  |
| Role of study sponsor and funders.....                                    | 2  |
| Composition, roles, and responsibilities .....                            | 3  |
| Project Management Group .....                                            | 3  |
| Independent Project Steering Committee .....                              | 4  |
| Contents .....                                                            | 5  |
| Figures .....                                                             | 7  |
| Tables.....                                                               | 7  |
| 1. Lay summary .....                                                      | 8  |
| 2. Introduction.....                                                      | 9  |
| 2.1 Background.....                                                       | 9  |
| 2.2 Rationale .....                                                       | 9  |
| 3. Aim and objectives .....                                               | 11 |
| 3.1 Aims.....                                                             | 11 |
| 3.2 Objectives .....                                                      | 11 |
| 4. Design.....                                                            | 12 |
| 5. Participants and study settings.....                                   | 13 |
| 5.1 Settings and locations where the data will be collected.....          | 13 |
| 5.2 Eligibility .....                                                     | 13 |
| 5.2.1 Inclusion criteria for participants.....                            | 13 |
| 5.2.2 Exclusion criteria for participants.....                            | 13 |
| 5.2.3 Eligibility criteria for study centres .....                        | 13 |
| 5.2.4 Eligibility criteria for interventionists.....                      | 13 |
| 6. Interventions .....                                                    | 14 |
| 6.1 Summary.....                                                          | 14 |
| 6.2 Microchipped devices .....                                            | 15 |
| 6.2.1 The eTrack nebuliser system (Pari GmbH) .....                       | 15 |
| 6.2.2 The Bi-neb AAD System from (Philips Healthcare).....                | 15 |
| 6.3 Information technology infrastructure .....                           | 15 |
| 6.3.1 The Qualcomm hub .....                                              | 15 |
| 6.3.2 CFHealthHub .....                                                   | 15 |
| 6.3.3 The Bi-Neb data transfer system .....                               | 16 |
| 6.4 The Behaviour Change Intervention (BCI) .....                         | 17 |
| 6.4.1 Rationale and theory .....                                          | 17 |
| 6.4.2 Intervention providers.....                                         | 22 |
| 6.4.3 Materials .....                                                     | 22 |
| 6.4.4 Procedures.....                                                     | 22 |
| 6.5 Usual care .....                                                      | 27 |
| 6.6 Criteria for discontinuing or modifying allocated interventions ..... | 27 |
| 6.7 Strategies to improve adherence to intervention protocols.....        | 28 |
| 6.7.1 For health professionals .....                                      | 28 |
| 6.7.2 For patients .....                                                  | 28 |
| 6.8 Relevant permitted / prohibited concomitant care .....                | 28 |
| 7. Outcomes .....                                                         | 29 |
| 7.1 Feasibility outcomes (‘stop-go’ or ‘success’ criteria for RCT).....   | 29 |
| 7.2 Process data relating to the implementation of the trial.....         | 29 |

1  
2  
3  
4  
5  
6  
7  
8  
9  
10  
11  
12  
13  
14  
15  
16  
17  
18  
19  
20  
21  
22  
23  
24  
25  
26  
27  
28  
29  
30  
31  
32  
33  
34  
35  
36  
37  
38  
39  
40  
41  
42  
43  
44  
45  
46  
47  
48  
49  
50  
51  
52  
53  
54  
55  
56  
57  
58  
59  
60

- 7.3 Process data relating to the implementation of the intervention.....30
- 7.4 Clinical outcomes and covariates .....31
  - 7.4.1 Primary clinical outcome .....31
  - 7.4.2 Secondary clinical outcomes .....32
  - 7.4.3 Adherence to prescribed medication.....33
- 8. Sampling .....37
  - 8.1 Quantitative components .....37
    - 8.1.1 Sites.....37
    - 8.1.2 Sample size .....37
    - 8.1.3 Approach, non-participation and recruitment .....37
  - 8.2 Qualitative components .....38
- 9. Assignment of interventions .....38
  - 9.1 Sequence generation .....38
  - 9.2 Allocation concealment .....38
  - 9.3 Implementation .....38
  - 9.4 Blinding .....38
- 10. Data collection, management and analysis .....39
  - 10.1 Quantitative data .....39
    - 10.1.1 Data collection methods.....39
    - 10.1.2 Data Management .....40
    - 10.1.3 Data quality assurance .....40
  - 10.2 Qualitative data .....41
    - 10.2.1 Audio recordings of consultations .....41
    - 10.2.2 Semi-structured interviews: participants .....41
    - 10.2.3 Semi-structured interviews: professionals .....41
    - 10.2.4 Undertaking the interviews .....41
- 11. Data analysis .....42
  - 11.1 Quantitative analysis.....42
  - 11.2 Qualitative analysis.....43
  - 11.3 Combining data and findings from the different components .....44
- 12. Monitoring .....44
  - 12.1 Oversight.....44
  - 12.2 Description of any interim analyses and stopping guidelines.....45
  - 12.3 Harms (safety assessments) .....45
    - 12.3.1 Serious Adverse Events .....45
    - 12.3.2 Adverse events we require reporting: .....46
    - 12.3.3 Expected SAEs and adverse events .....46
    - 12.3.4 Reporting .....47
  - 12.4 Auditing .....47
  - 12.5 Finance and indemnity.....47
- 13. Ethics and dissemination .....48
  - 13.1 Approvals.....48
  - 13.2 Protocol amendments.....48
  - 13.3 Consent .....48
  - 13.4 Confidentiality .....49
  - 13.5 Declaration of Interests .....49
  - 13.6 Access to data .....49
  - 13.7 Ancilliary and post-trial care .....49
  - 13.8 Dissemination policy .....49
- References.....51
- Appendix 1. W.H.O. Trial Registration Data Set .....56



## Figures

|                                                                                 |    |
|---------------------------------------------------------------------------------|----|
| Figure 1. Interaction between complex intervention components .....             | 14 |
| Figure 2. Interactions between capability, opportunity and motivation .....     | 17 |
| Figure 3. Habit formation incorporating COM-B and necessities and concerns..... | 18 |
| Figure 4. Interplay between COM-B components during habit formation.....        | 18 |
| Figure 5. Behaviour change intervention flow chart .....                        | 26 |
| Figure 6. Participant timeline for the external pilot RCT .....                 | 36 |
| Figure 7. Assumptions of the MRC Guidance on Process Evaluation .....           | 43 |

## Tables

|                                                                 |    |
|-----------------------------------------------------------------|----|
| Table 1. Learning objectives of the CFHealthHub modules .....   | 16 |
| Table 2: Intervention modules .....                             | 20 |
| Table 3. Individual-level data derived from PWCF and sites..... | 34 |
| Table 4. CFHealthHub data (research arm only) .....             | 35 |

## 1. Lay summary

Cystic Fibrosis (CF) is an inherited disease affecting 10000 people in the UK with an average age at death of 28 years in 2012. The lungs of people with CF (PWCF) are prone to infections. Daily physiotherapy and inhaled medications are needed to stay healthy. Around £30 million is spent annually on inhaled therapy but average adherence has been shown to be only 36%. Data suggest that adherence is better in younger children (71% in under 12s, falling to 50% in teenagers) but of the 10000 UK PWCF almost 6000 are now adults. PWCF who collect <50% of their medication cost the healthcare system significantly more than PWCF who collect more than 80% and most of the additional cost results from unscheduled emergency care and hospital admission. This unscheduled emergency care is distressing for PWCF and their families.

We have designed an intervention to help adult PWCF see how much treatment they use. We use dose-counting nebulisers to collect data and send it to a website where it can be displayed. We have worked with PWCF to make the information easy to understand. The website has modules which teach PWCF how to build successful treatment habits. We have developed a toolkit to help PWCF and a health professional (interventionist) work together to form habits of adherence to treatment.

The NHS should not fund this intervention without its effectiveness and value for money being evaluated in a Randomised Controlled Trial (RCT). However, there is currently insufficient information to effectively plan or justify funding a RCT on the scale required. This feasibility study is an essential preliminary to the full scale RCT. The purpose of this feasibility study is to see whether the proposed procedures for the full scale RCT are feasible and acceptable to PWCF. It will also tell us whether the intervention can be delivered by health professionals and is acceptable to PWCF, outside the NHS trust where it was developed.

We will recruit PWCF for four months at two CF units. We hope we will recruit 64 PWCF overall, but will deem the full scale RCT feasible if we recruit 48. A computer will decide whether people who consent to be in the study will receive usual care alone or also receive the intervention. Both groups have a short period of two to four weeks when data is collected through their nebulisers and fed back to the website. It is only after that period that those allocated to the intervention are allowed to use the website and receive enhanced care from the interventionist. After that point, all participants are followed up for 5 (+/-) months. Participants will complete a series of questionnaires at the outset and at 5 (+/-) months.

With appropriate consent, the interventionist or member of the multidisciplinary team (MDT) will audio record consultations between themselves and PWCF who are receiving the intervention or usual care. Qualitative researchers will conduct: 20-24 interviews with PWCF receiving the intervention; 20-24 interviews with PWCF receiving usual care; eight interviews with the four health professionals who are delivering the intervention; and eight semi-structured interviews with members of the wider MDT. These interviews are intended to help the team understand and mitigate potential sources of failure in the intervention and the proposed full-scale trial.

## 2. Introduction

### 2.1 Background

Cystic Fibrosis (CF) is a long term condition (LTC) in which poor adherence to high cost drugs shortens lives and increases NHS costs. CF is a LTC affecting 10,000 people in the UK with PWCF typically dying from lung damage at a median age of 28 years [1]. Randomised controlled trials show that preventative medications reduce exacerbations and/or preserve lung function, [2–8] however adherence is poor. A recent review of objective measures of adherence using medicine possession ratios (MPR: prescriptions collected over prescriptions issued) and instrumented medication monitors showed adherence ranging from 67% for oral antibiotics, 31-53% for inhaled antibiotics, 53-79% for mucolytics agents and 41-72% for hypertonic saline [9]. Accumulating evidence suggests poor adherence is associated with poor outcomes. PWCF collecting four or more courses of alternate month nebulised tobramycin per year were 60% less likely to be admitted to hospital than PWCF collecting one or less [10]. Lower composite MPR predicted exacerbations requiring intravenous antibiotics (IVAB) [9] and over a 12 month period PWCF with an MPR of 80% had significantly lower total healthcare costs than PWCF with an MPR <50% with a cost difference \$14,211 per patient and most excess costs related to hospital care [11]. Rescue therapy with IVAB can cause renal failure [12]. The total 2012 UK spend for CF was estimated to be £100 million of which £30 million was spent on inhaled antibiotics and mucolytics [13]. Although patient self-reported adherence to inhaled therapy was 80%, objective measurement showed median adherence was only 36% and the clinicians were unable to predict which PWCF were able to successfully adhere [14] making adherence support difficult. In 2012, the UK CF population received 171,907 days of IVAB with the 93,455 of these that occurred in hospital costing an estimated £27 million [15]. It is recommended that adherence interventions should be targeted where adherence really matters [16] and targeting support towards the high cost inhaled preventative drugs in CF (median adherence 36%) has the potential to impact on the 171,907 days of IVAB a proportion of which will represent rescue therapy necessitated by failed prevention.

### 2.2 Rationale

The National Institute for Health Research have commissioned a Programme Grant for Applied Research to systematically develop and evaluate an adherence intervention for PWCF. The Programme Grant has three work packages

Work package 1: Build IT infrastructure to capture adherence data from nebulisers. Co-produce a web-portal, 'CFHealthHub', with PWCF and clinicians, in order to display routinely collected adherence data for the use of both groups.

Work package 2: Develop a toolkit based on psychological theory that can support PWCF to adhere to treatment. This will include feedback of measured adherence data and personalised interventions to increase adherence delivered through CFHealthHub. Manualise a Behaviour Change Intervention (BCI) for use by health professionals and PWCF.

All four work packages have received a favourable opinion from an NHS REC:

- Work package 2.1A: A study of the views of people with cystic fibrosis about their condition and treatments (Hampshire A REC: 14/SC/1455; IRAS: 171049);

- 1  
2  
3  
4  
5  
6  
7  
8  
9  
10  
11  
12  
13  
14  
15  
16
- Work package 2.1C: A study to produce videos for the CFHealthHub website (Camden & Kings Cross REC: 15/LO/0944; IRAS: 182367);
  - Work package 2.2B: A study to develop a Behaviour Change Intervention (BCI) to help patients with CF manage treatment adherence ((South Yorkshire REC: 15/YH/0332; IRAS: 184477); and,
  - Work package 2.2B(1): A study to understand how to use the eTrack and Bi-neb nebuliser to help people with CF to manage their inhalation treatments (West of Scotland REC 5: 15/WS/0089; IRAS: 177900).

17  
18  
19  
20  
21  
22  
23

Work package 3: Evaluate the toolkit developed in work package 2. The planned definitive evaluation will take place in a large-scale, multi-centre Randomised Controlled Trial (RCT). The definitive evaluation will compare usual care plus staff training in the importance of knowledge, skills and confidence building for adherence versus the same plus the structured behaviour change in intervention (CFHealthHub plus manual).

24  
25  
26

There is too little information available to effectively plan or justify funding a full scale RCT. We wish to conduct feasibility study comprising of:

- 27  
28  
29  
30  
31  
32  
33  
34  
35  
36  
37  
38  
39  
40  
41  
42  
43  
44  
45  
46  
47  
48  
49  
50  
51  
52  
53  
54  
55  
56  
57  
58  
59  
60
- an ‘external pilot RCT’ to establish the feasibility of recruitment to a larger, definitive study; and,
  - a ‘process evaluation’ which will help us understand the strengths and weaknesses of both the intervention and research protocols, and ways of addressing any weaknesses.

### 3. Aim and objectives

#### 3.1 Aims

The principal aims of this feasibility study are to assess the feasibility and acceptability of:

- a complex intervention, when delivered outside the team which conceived and developed it; and,
- procedures for a full-scale RCT.

#### 3.2 Objectives

1. An external pilot randomised controlled trial to determine feasibility of a randomised controlled trial based on objective stop-go criteria (Section 7.1) related to:

- (a) participant recruitment;
- (b) participant retention; and,
- (c) quality of primary outcome data at 5(+/- 1) month.

2. A process evaluation, relating quantitative and qualitative data on procedures to outcomes, in order to understand and mitigate potential sources of failure in:

- (a) the intervention; and,
- (b) the full trial.

## 4. Design

Mixed-methods study comprising of:

- Quantitative component: parallel group, open labelled, external pilot RCT;
- and,
- Qualitative component: analysis of audio-recorded consultations and interviews.

Quantitative and qualitative data will contribute to the process evaluation.

## 5. Participants and study settings

### 5.1 Settings and locations where the data will be collected

Nebuliser adherence data and information derived from CFHealthHub will be automatically uploaded by participants nebulisers in their own home. Data collection involving patient notes and patient reported outcome measures will take place in two specialist CF units which have not been involved in the development of the intervention. Exacerbation data will be collected by the ACtiF trial interventionist and clinicians at sites from participant notes.

### 5.2 Eligibility

#### 5.2.1 Inclusion criteria for participants

1. Diagnosed with CF and with data within the CF registry
2. Aged 16 years and above
3. Taking inhaled mucolytics or antibiotics via a chipped nebuliser (e.g. eTrack or Bi-Neb) or able and willing to take via eTrack or Bi-Neb.

#### 5.2.2 Exclusion criteria for participants

1. Post-lung transplant
2. People on the active lung transplant list
3. Patients receiving palliative care, Lacking in capacity to give informed consent
4. Using dry powder devices to take antibiotics or mucolytics

#### 5.2.3 Eligibility criteria for study centres

1. Adult CF Centre;
2. Recognised by commissioners
3. Receiving year-of-care funding

#### 5.2.4 Eligibility criteria for interventionists

1. Health care professional e.g. registered nurse, physiotherapist or other appropriately skilled individual such as a psychology graduate able to work at NHS Agenda for Change Band - 4 or above

## 6. Interventions

### 6.1 Summary

In the external pilot RCT, we will test procedures for a full trial. This involves allocation of PWCF to either a complex intervention or usual care. A ‘complex intervention’ is defined as one with several interacting components [17]. The complex intervention under evaluation has three broad categories of components (Figure 1):

(a) *a microchipped device* (nebuliser) for delivering inhaled medications, which are routinely prescribed for the control of cystic fibrosis (Section 6.2);

(b) *information technology infrastructure* to capture and store adherence data from the nebulisers and display it to PWCF and the CF team (Section 6.3); and,

(c) *the behaviour change intervention*, comprising a software platform (‘CFHealthHub’ mobile apps and website) offering adherence feedback and tailored modules of content and tools used by the health professional in interactions with PWCF (Section 6.4) and accessed independently by PWCF via CFHealthHub

Services received as usual care described in Section 6.5.

**Figure 1. Interaction between complex intervention components**

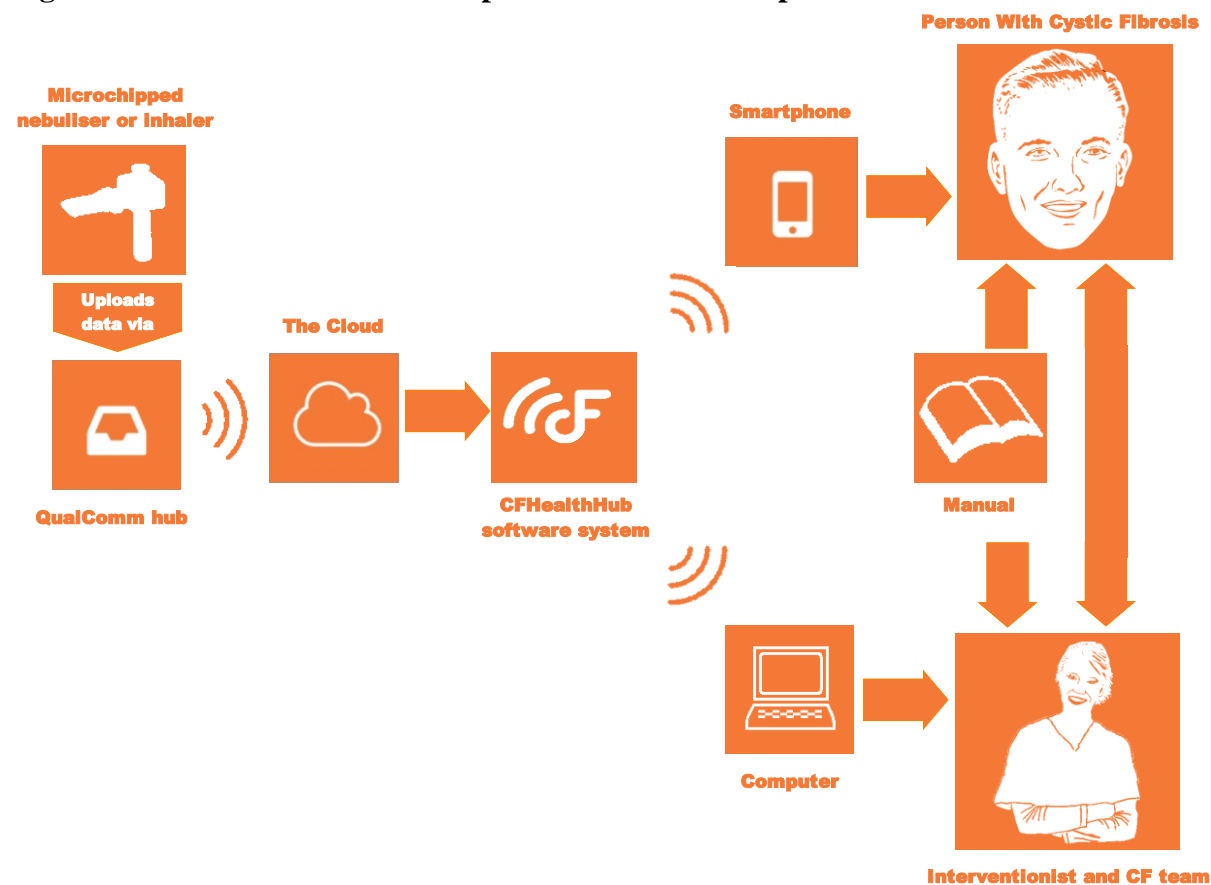



## 6.2 Microchipped devices

Depending on treatment strategies at different centres the participant may use an eTrack nebuliser system (Section 6.2.1), an Bi-neb AAD System from (Section 6.2.2).

### 6.2.1 The eTrack nebuliser system (Pari GmbH)

The eTrack controller is a modified version of the eBase controller and can be used to operate both the eFlow rapid nebulizer or Altera nebulizer. Compared to the eBase controller the eTrack is equipped with a Bluetooth chip and has a monitoring function to allow the capture of inhalation adherence data. The eFlow rapid nebuliser with eTrack controller is a CE marked medical device to be used for inhalation therapy. The device allows medications (approved for inhalation) to be transported deep into the lungs.

### 6.2.2 The Bi-neb AAD System from (Philips Healthcare)

The Bi-neb AAD system is a CE marked medical device which is intended for use to deliver aerosolised liquid medications for participants with cystic fibrosis. The drug delivery device is small and battery powered designed to deliver a precise dose of drug into patient's lungs. The Bi-neb AAD system is designed to deliver liquid medications that are specifically approved for use with the Bi-neb AAD System.

## 6.3 Information technology infrastructure

The information technology infrastructure for the complex intervention comprises:

- i. The Qualcomm hub (Section 6.3.1)
- ii. CFHealthHub (Section 6.3.2).
- iii. The Bi-Neb data transfer system (6.3.3)

### 6.3.1 The Qualcomm hub

The Qualcomm hub (Qualcomm; Cambridge, UK) is a wireless device which acquires data from the chipped device and transmits it to a cloud-based data centre. It is a Class I MDD and CE registered in Europe. It is designed, developed and manufactured in accordance with a quality system compliant with ISO13485 standards, meaning it aligns with the quality requirements of international regulatory agencies in the health care industry.

### 6.3.2 CFHealthHub

CFHealthHub is a web-portal which displays adherence data and provides resources and tools to people with cystic fibrosis and health professionals in order to support improved nebuliser adherence. It is available on-line via computers, tablets or mobile phones.

A qualitative study (WP 2.1A) to identify the barriers and facilitators of nebuliser use in PWCF informed the development of an intervention designed to increase nebuliser adherence. Analysis of the interview data was conducted using the COM-B framework, and these findings were used to inform the development of a complex intervention centred around the feedback of objective adherence data. The intervention was further developed and refined in consultation with PWCF and clinicians. An iterative study in which prototype versions of the intervention were delivered to and reviewed by PWCF was conducted. In that iterative study we interviewed PWCF and interventionists about the usability and tailoring of the

intervention, and made improvements to the process and materials based on this feedback. The system has been developed to ensure it meets the requirements of the Data Protection Act 1998. It is intended that data on maintenance and relapse will be generated during the full scale trial.

CFHealthHub has a number of modules addressing barriers to adherence based on the COM-B system described in greater detail in Section 6.4.1. The objectives of the modules as mapped to the COM-B are outlined in Table 1 below.

**Table 1. Learning objectives of the CFHealthHub modules**

| COM-B model component    | Objectives                                                                                                                                                                                                         |
|--------------------------|--------------------------------------------------------------------------------------------------------------------------------------------------------------------------------------------------------------------|
| Physical capability      | - Have the skills to be able to use the nebuliser correctly                                                                                                                                                        |
| Psychological capability | - Understand the importance of nebuliser use in CF treatment<br>- Be able to remember to use nebuliser<br>- Be able to self-monitor nebuliser use<br>- Be aware of a need to improve nebuliser use                 |
| Physical opportunity     | - Have a realistic medication plan<br>- Have a working/functioning nebuliser<br>- Have a suitable place to use nebuliser<br>- Have the time to use nebuliser                                                       |
| Social opportunity       | - Be/feel supported by others to use nebuliser                                                                                                                                                                     |
| Reflective motivation    | - Perceive benefits of nebuliser use<br>- Perceive few/no concerns about nebuliser use<br>- Understand the health consequences of use/non-use<br>- Feel confident about nebuliser use<br>- Intend to use nebuliser |
| Automatic motivation     | - Have an established routine for nebuliser use<br>- Have a habit to use nebuliser                                                                                                                                 |

### 6.3.3 The Bi-Neb data transfer system

The Bi-Neb Bluetooth data transfer system is intended to automatically extract breathing device use (adherence data) from the device (Bi-Neb) via a Smartphone hub and a secure data server onto CFHealthHub. Providing the Bi-Neb is within the Bluetooth range within the patient's house, the system can retrieve this data once a day.

## 6.4 The Behaviour Change Intervention (BCI)

### 6.4.1 Rationale and theory

The rationale of the BCI is to help CF patients to self-manage their condition and to form habits that will improve adherence to their medication, thereby extending life and improving quality of life. The MRC framework for developing and evaluating complex interventions recommends that intervention development should be informed by a suitable theoretical framework and evidence base [17]. The theoretical model adopted is the COM-B model [18] which describes a ‘behaviour system’ of the essential and interacting conditions of Capability, Opportunity, and Motivation [18]. The model posits that non-adherence is either non-intentional (a problem of capability or opportunity) or intentional (a problem of motivation). The model has been adapted to nebuliser adherence on the basis of evidence about the factors influencing nebuliser adherence in PWCF [19–32], input from expert clinicians currently delivering services to PWCF, as well as from the PPI panel and exploratory research conducted in Sheffield. It is important that interventions are tailored to individual needs and use a multi-modal approach [33]. Each of the conditions of Capability, Opportunity and Motivation has been considered in turn in the development of our intervention. The primary component of the intervention is adherence feedback delivered via the CFHealthHub. Evidence suggests that while personalised feedback can have an effect size of up to 20% in increasing adherence [34, 35], feedback is most effective when combined with additional behaviour change techniques [34].

**Figure 2. Interactions between capability, opportunity and motivation**

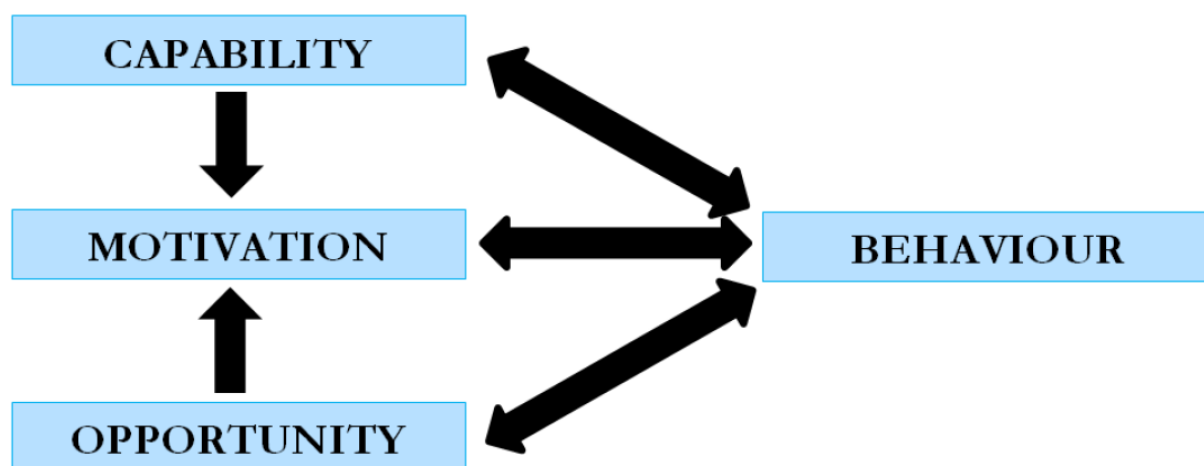

Figure 3. Habit formation incorporating COM-B and necessities and concerns

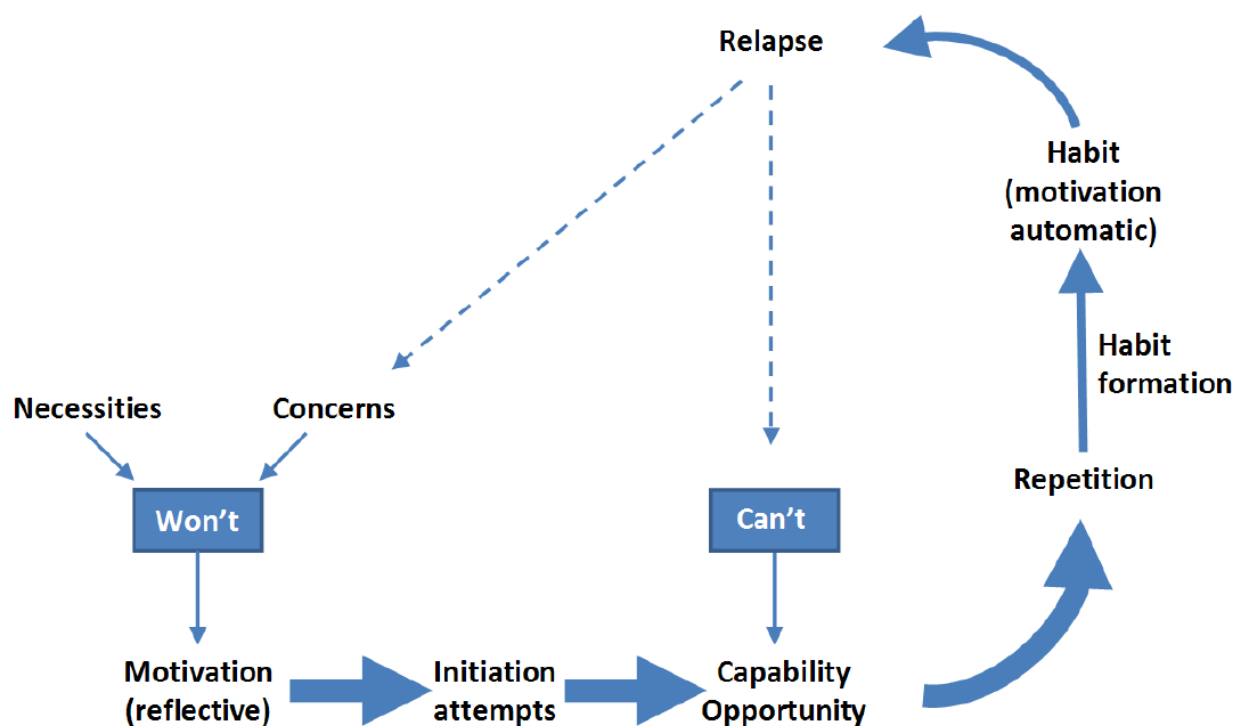

Figure 4. Interplay between COM-B components during habit formation

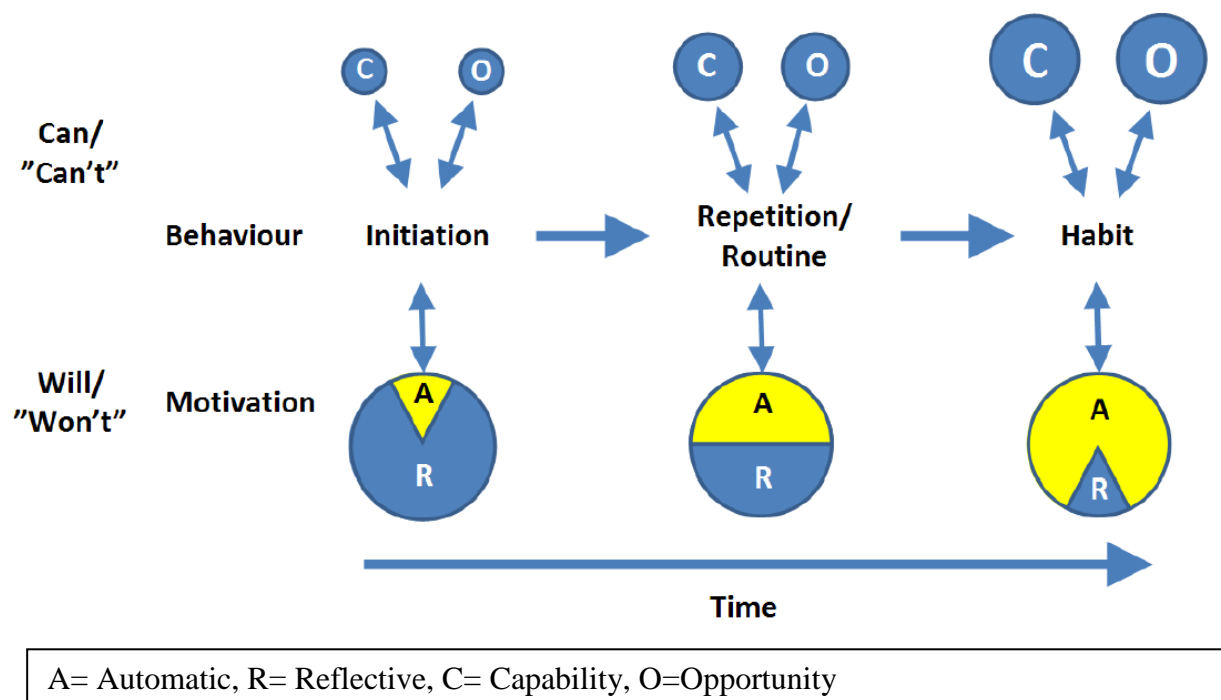

1  
2  
3 The identification and choice of appropriate behaviour change techniques has been driven by  
4 the Behaviour Change Wheel framework for the development of interventions [Michie, S. F.,  
5 Atkins, L., & West, R. (2015). The behaviour change wheel: a guide to designing  
6 interventions.] which outlines a process of intervention design using the COM-B model  
7 "through the systematic evaluation of theory and evidence" (p. 13). In brief, the process  
8 involved the following steps:  
9

- 10  
11 1. In depth identification and analysis of the factors influencing nebuliser adherence in  
12 PWCF through an examination of the existing literature, and a qualitative study in  
13 which participants viewed charts of their objective nebuliser adherence data within an  
14 interview about factors affecting their motivation, capability and opportunity to adhere  
15 to their nebuliser treatment (study 2.1). The Theoretical Domains Framework (TDF;  
16 [36]) which analyses Capability, Opportunity and Motivation in greater detail was  
17 used as a framework to guide the analysis.  
18
- 19 2. Identification and evaluation of potential intervention functions (e.g. education,  
20 persuasion, enablement, environmental restructuring, modelling) to address the  
21 identified factors influencing nebuliser adherence in consultation with the research  
22 team, clinicians and PPI.  
23
- 24 3. Development of intervention modules to include specific Behaviour Change  
25 Techniques to deliver intervention functions, selection of mode of delivery, and  
26 mechanism for tailoring of BCI delivery to meet individual needs with regard to  
27 Capability, Opportunity and Motivation. The module contents have been discussed  
28 and refined as a result of discussions with clinicians and PPI.  
29
- 30 4. Identification of potential mediators of behaviour change, and identification of tools to  
31 measure each mediator.  
32  
33

34 The intervention arrived at through this process is described in Table 2.  
35  
36  
37  
38  
39  
40  
41  
42  
43  
44  
45  
46  
47  
48  
49  
50  
51  
52  
53  
54  
55  
56  
57  
58  
59  
60

**Table 2: Intervention modules**

| Module                                            | COM-B                                                                                          | Intervention functions                                 | Behaviour Change Techniques                                                                                                                                                                                                                                  | Mode of Delivery                                                                                                                                                                                                                                                  |
|---------------------------------------------------|------------------------------------------------------------------------------------------------|--------------------------------------------------------|--------------------------------------------------------------------------------------------------------------------------------------------------------------------------------------------------------------------------------------------------------------|-------------------------------------------------------------------------------------------------------------------------------------------------------------------------------------------------------------------------------------------------------------------|
| <i><u>Universal parts of the intervention</u></i> |                                                                                                |                                                        |                                                                                                                                                                                                                                                              |                                                                                                                                                                                                                                                                   |
| <b>Self-monitoring</b>                            | Psychological capability<br>Reflective Motivation                                              | Education<br>Environmental restructuring<br>Enablement | <ul style="list-style-type: none"> <li>• Self-monitoring of behaviour</li> <li>• Adding objects to the environment (CFHealthHub)</li> </ul>                                                                                                                  | <ul style="list-style-type: none"> <li>• Charts of objective adherence data presented within CFHealthHub</li> </ul>                                                                                                                                               |
| <b>Goal setting &amp; review</b>                  | Psychological capability<br>Automatic motivation                                               | Enablement<br>Incentivisation                          | <ul style="list-style-type: none"> <li>• Goal setting (behaviour)</li> <li>• Feedback on behaviour</li> <li>• Discrepancy between current behaviour and goal</li> <li>• Review behavioural goals</li> <li>• Graded tasks</li> <li>• Social reward</li> </ul> | <ul style="list-style-type: none"> <li>• Discussion and agreement of goal with interventionist</li> <li>• Review of goal</li> <li>• Feedback on progress (through CFHealthHub and interventionist)</li> <li>• Visual reward if goal met on CFHealthHub</li> </ul> |
| <b>Treatment plan</b>                             | Psychological capability<br>Physical Opportunity<br>Social Opportunity<br>Automatic motivation | Training<br>Environmental restructuring<br>Enablement  | <ul style="list-style-type: none"> <li>• Action planning</li> <li>• Habit formation</li> <li>• Prompts/cues (tailored)</li> </ul>                                                                                                                            | <ul style="list-style-type: none"> <li>• Action planning tool within CFHealthHub</li> <li>• Option to set reminders</li> </ul>                                                                                                                                    |
| <b>Confidence building</b>                        | Reflective Motivation                                                                          | Persuasion                                             | <ul style="list-style-type: none"> <li>• Focus on past success</li> </ul>                                                                                                                                                                                    | <ul style="list-style-type: none"> <li>• Interventionist encouraging focus on periods of higher adherence on charts</li> </ul>                                                                                                                                    |

| Module                                                                                                                                                           | COM-B                                                                                         | Intervention functions                                | Behaviour Change Techniques                                                                                                                                                                                                                                                                                               | Mode of Delivery                                                                                                                                                                                                                                                                                                                                                                                                                                                       |
|------------------------------------------------------------------------------------------------------------------------------------------------------------------|-----------------------------------------------------------------------------------------------|-------------------------------------------------------|---------------------------------------------------------------------------------------------------------------------------------------------------------------------------------------------------------------------------------------------------------------------------------------------------------------------------|------------------------------------------------------------------------------------------------------------------------------------------------------------------------------------------------------------------------------------------------------------------------------------------------------------------------------------------------------------------------------------------------------------------------------------------------------------------------|
| <i>Tailored parts of the intervention (based on baseline COM beliefs and barriers questionnaire (COM-BMQ)<sup>1</sup> and consultation with interventionist)</i> |                                                                                               |                                                       |                                                                                                                                                                                                                                                                                                                           |                                                                                                                                                                                                                                                                                                                                                                                                                                                                        |
| <b>My treatment</b>                                                                                                                                              | Reflective<br>Motivation<br>Psychological capability                                          | Education<br>Persuasion<br>Modelling                  | <ul style="list-style-type: none"> <li>• Information about health consequences</li> <li>• Credible source</li> <li>• Salience of consequences</li> <li>• Demonstration of the behaviour</li> <li>• Vicarious consequences</li> <li>• Self-talk</li> </ul>                                                                 | <ul style="list-style-type: none"> <li>• Q&amp;A linked to information within CFHealthHub (tailored by baseline beliefs and prescription data)</li> <li>• Presentation through text, patient stories, 'talking heads' and animation</li> <li>• Credible sources including clinicians, PWCF and interventionist</li> <li>• Interventionist eliciting self-talk through focus on why motivation is not lower than rating given on pre-screening questionnaire</li> </ul> |
| <b>Confidence building</b>                                                                                                                                       | Reflective<br>Motivation                                                                      | Modelling<br>Persuasion                               | <ul style="list-style-type: none"> <li>• Demonstration of behaviour</li> </ul>                                                                                                                                                                                                                                            | <ul style="list-style-type: none"> <li>• 'Talking heads' videos of coping stories within CFHealthHub</li> </ul>                                                                                                                                                                                                                                                                                                                                                        |
| <b>Problem-solving (including skills training)</b>                                                                                                               | Physical capability<br>Psychological capability<br>Physical opportunity<br>Social opportunity | Training<br>Environmental restructuring<br>Enablement | <ul style="list-style-type: none"> <li>• Instruction on how to perform the behaviour</li> <li>• Demonstration of the behaviour</li> <li>• Behavioural practice/rehearsal</li> <li>• Problem solving</li> <li>• Restructure the physical environment</li> <li>• self-talk</li> <li>• social support (practical)</li> </ul> | <ul style="list-style-type: none"> <li>• Tailored problem solving guided by interventionist</li> <li>• Solution bank within CFHealthHub.</li> <li>• Construction of if-then coping plans</li> <li>• Videos demonstrating correct use of nebulisers within CFHealthHub</li> </ul>                                                                                                                                                                                       |

---

1  
Incorporating the Beliefs about Medicines Questionnaire (BMQ-specific nebuliser treatment) Horne, 2010

## 6.4.2 Intervention providers

Interventionists may already be working at, or be new to participating organisations or be the ACTiF interventionist employed to deliver the trial locally at the site. Externally appointed staff will be recruited through a formal job interview. Suitable individuals will include registered nurses or other member of the multidisciplinary team or a ; graduate in a suitable subject such as psychology or, other relevant profession who holds relevant skills / experience. Candidates for the post will ideally have a minimum of two years postgraduate experience which might include delivering a research project to time and target. They will be employed on the Project to work to NHS Agenda for Change Band 4 or above. They must have access to a car for work purposes e.g. participant home visits.

Interventionists will be supported in the delivery of the intervention by members of the Multidisciplinary team (MDT) at the site in which they are based. MDTs will receive training about the approach of the intervention, and the way in which they can support its delivery (see page 28).

Training for interventionists in how to deliver the intervention according to the specifications of the behaviour change manual will be provided by Marlene Hutchings with oversight provided by Madelynne Arden and/or Judy Bradley. A comprehensive training manual and training programme will be developed to facilitate this. A certificate of competence will be provided prior to the interventionist being able to use CFHealthHub with participants.

An additional trained regional interventionist will offer support to trial sites. This on occasion will involve input to patients (face to face or telephone contact), and assisting with problem solving via liaising with the nebuliser company. They will be named on the local site delegation log.

## 6.4.3 Materials

The BCI contains two broad categories of components:

- i. CFHealthHub behaviour change modules including adherence feedback used by PWCF and health professionals
- ii. The behaviour change manual and toolkit used by the interventionist in interactions with PWCF in order to understand the specific barriers to adherence for that individual, and to tailor and personalise delivery of the behaviour change modules accordingly.

## 6.4.4 Procedures

The BCI will be delivered over a 4 to 6 month period through a combination of face-to-face sessions and contact via telephone with an interventionist, and through participant interaction with different modules of content available on CFHealthHub. The interventionist will discuss participant data with members of the MDT to ensure that care is informed by objective adherence data. If any concerns become apparent as the interventionists collect data and work with participants, these concerns will be passed onto the clinical team. The clinical team will



1  
2  
3 follow their standard procedures in relation to any concerns raised. The intervention content  
4 and delivery flow are outlined in Figure 5 and described below:

#### 5 6 *6.4.4.1 Consent Visit (all participants)*

7 At the consent visit participants will be given a chipped nebuliser (eTrack) and Qualcom hub  
8 or the participants will receive a visit from a clinical trainer who will convert the participant's  
9 I-neb to a Bi-neb by adding a Bluetooth chip and providing a Smartphone hub. The clinical  
10 trainer may set up the Bi-neb in the patient's home or at hospital either during the main  
11 consent visit or at a separate visit after consent has been obtained. Both the eTrack and Bi-neb  
12 will connect to CFHealthHub which will enable adherence data be collected. The  
13 interventionist will input the participant's prescription details into CFHealthHub. Together  
14 these will allow the system to generate adherence charts for that participant. At this visit  
15 participants will complete a range of baseline measures (see Table 3) including the COM  
16 beliefs and barriers questionnaire (COM-BMQ) which will be entered into CFHealthHub.  
17 The responses to this questionnaire will be used to populate the 'My toolkit' section of  
18 CFHealthHub with specific tailored elements from the 'My treatment' modules prior to the  
19 Initial Intervention Visit. The participant's pseudomonas status will be clarified at baseline  
20 and confirmed by the PI with the opportunity to compare the participant's prescription with  
21 the pseudomonas status.  
22  
23  
24

#### 25 *6.4.4.2 Initial Intervention Visit (intervention arm only)*

26 Participants will be introduced to CFHealthHub. They will be asked to complete an online  
27 consent form on behalf of their NHS trust in which they will specify what additional data they  
28 would be willing for CFHealthHub to record and display (e.g. name, and uploaded  
29 photographs) and what functional options they would like access to (e.g. push notifications).  
30 Permissions may be changed at any time. The participant will have the option to upload their  
31 own "patient story" into CFHealthHub after completion of the online consent form.  
32 The interventionist will discuss their motivation to adhere to their nebuliser treatment, will  
33 address beliefs associated with poor adherence and will refer back to answers on the COM-  
34 BMQ to elicit the participants beliefs associated with adherence. Participants will be shown  
35 'My toolkit' which will have been prepopulated with tailored motivational content (see  
36 consent visit).  
37  
38  
39

40 The interventionist and participant will look at and discuss the adherence charts on  
41 CFHealthHub with a focus on period of higher adherence. The interventionist will note any  
42 barriers raised by participants during this discussion.

43 The interventionist will support the participant to identify where and when additional  
44 nebuliser treatments could be fitted into their schedule and support them to make an action  
45 plan using the online tool available on CFHealthHub. This action plan will be saved to the  
46 'My toolkit' zone. The interventionist will then agree a % adherence goal for the next four to  
47 six weeks based on the number of additional treatments that have been planned. This will be  
48 recorded on CFHealthHub and will be represented by a target line on the adherence charts.

49 If motivation is so low that participants are reluctant to set an action plan/goal then the  
50 interventionist will spend further time discussing motivation and will skip to confidence  
51 building (see below).  
52  
53  
54

55 The interventionist will encourage participants to focus on likely problems or issues that  
56 might disrupt the achievement of the adherence goal and will use the Problem-solving module  
57 on CFHealthHub to address each of these anticipated problems. The Problem-solving module  
58 includes solutions based on educational content, practical support (e.g. model letters to  
59  
60

1  
2  
3 employers) and interactive tools. Relevant solutions will be saved to the 'My Toolkit' zone of  
4 CFHealthHub.

5 The interventionist will discuss the participant's confidence to meet their goal and will  
6 identify 2-3 'talking heads' videos showing other people with CF addressing and overcoming  
7 similar barriers to nebuliser adherence.  
8

9 The visit will conclude with a review of the goal and the tailored and personalised contents  
10 saved to the 'My toolkit' zone of CFHealthHub. The interventionist will encourage a learning  
11 mindset, emphasising that even if adherence doesn't increase starting to think about adherence  
12 will produce learning that will make subsequent attempts to change easier.  
13

#### 14 6.4.4.3 Participant Independent access to CFHealthHub (intervention arm)

15 Participants will have independent access to CFHealthHub at all times following the Baseline  
16 visit. They can, at any time, access their adherence charts, 'My toolkit' contents, and can  
17 browse the other areas of content as they wish. Frequency of access to each area of  
18 CFHealthHub will be monitored and recorded.  
19

20 Adherence charts will provide colour -coded feedback about participant achievement towards  
21 their adherence goal so that they are provided with immediate, easy to recognise information  
22 about their achievements. Subject to consent, participants will be sent encouraging messages  
23 via push notifications, or alternatively when they access CFHealthHub, to match the progress  
24 made e.g. congratulations on achieving their goal, congratulations on having made progress  
25 towards their goal, encouragement to remember their action plan.  
26  
27

#### 28 6.4.4.4 Review visit (Visit 3 - intervention arm)

29 At the review visit, the interventionist and participant will look at and discuss the adherence  
30 charts on CFHealthHub and goal achievement with a focus on progress made and periods of  
31 higher adherence.  
32  
33

34 If the adherence goal was met then the participant will be encouraged to set a new higher  
35 adherence goal or to a goal to maintain their current level of adherence which will be recorded  
36 on CFHealthHub. Following this the participant and interventionist will review the contents of  
37 'My toolkit' and revise action plans, problems/solutions as required. If issues of motivation are  
38 still a concern the interventionist may recommend additional/alternate elements of content  
39 from 'My treatment' or 'Talking heads' to go into 'My toolkit'.  
40

41 If the adherence goal was not met then the interventionist and participants will discuss the  
42 barriers to goal achievement (motivation, capability, opportunity). The interventionist will  
43 address beliefs associated with poor adherence and will add/revise the elements of content  
44 from 'My treatment' or 'Confidence building' to go into 'My toolkit'.  
45

46 If no goal was previously set then the interventionist will review motivation and confidence  
47 and then will consider if the participant is ready to action plan and set a goal. If not they will  
48 spend more time reviewing motivation and confidence.  
49

50 The participant will be encouraged to set a realistic % adherence goal for the next four to six  
51 weeks and this will be recorded on CFHealthHub. The interventionist will support the  
52 participant to revise their action plan as needed and save this to the 'My toolkit' zone. Based  
53 on the earlier discussion about the barriers that prevented goal achievement the Problem-  
54 solving module on CFHealthHub will be used to address each of the problems encountered,  
55 and any that are anticipated. Relevant solutions will be saved to the 'My Toolkit' zone of  
56 CFHealthHub.  
57

58 The visit will conclude with a review of the goal and the tailored and personalised contents  
59 saved to the 'My toolkit' zone of CFHealthHub. The interventionist will re-emphasise a  
60

1  
2  
3 learning mindset, emphasising that the participant cannot fail, but can learn from the process  
4 so that they can work together on the adherence challenge.  
5

6  
7 Participating centres will provide participants with contact details, typically telephone  
8 numbers, but other methods may be volunteered by centres. Contact details will be provided  
9 so that participants can contact the centre if they have queries or problems regarding  
10 CFHealthHub between visits. The interventionist will be able to feedback any information  
11 from the intervention delivery **after** the baseline intervention visit to members of the wider  
12 CF team. This may include adherence data from sessions with the participant's clinician and  
13 MDT particularly if the participant raises any concerns or issues e.g. side effects of a drug to  
14 allow their usual clinician to discuss this with them at their next clinic visit.  
15

#### 16 *6.4.4.5 Subsequent Review (intervention arm)*

17 Following these two sessions the amount of interaction which each PWCF has with the  
18 interventionist will be tailored to their needs and requirements although it is anticipated that  
19 these will normally marry with routine clinic visits: They may have additional face-to-face  
20 sessions or contact via telephone or e-mail. No more than one monthly face-to-face session  
21 will be conducted because of the research protocol; if the participant requests additional  
22 support, the centre may accommodate this at their discretion. Review meetings will take 30  
23 minutes and be conducted over the 5month (+/- 1 month) of the follow-up period. The  
24 structure of review sessions will follow the same pattern as for 6.4.4.4.  
25  
26  
27  
28  
29  
30

#### 31 *6.4.4.6 Final research visit (5 months +/- 1 month from consent)*

32  
33 All participants will complete a final research visit 4-6 months from the date of consent. At  
34 this visit the interventionist will collect the primary and secondary outcome data (see table 3)  
35 including demography data, health care resource use and the participant completed  
36 questionnaires. At this final research visit the interventionist will re-check that all adherence  
37 data has been transferred to CFHealthHub. The eTrack can store approximately 6 months of  
38 treatment data, ensuring all the data is transferred at this visit should help to prevent missing  
39 data.  
40  
41

42 Following the final 4-6 month post-consent research visit, we will continue to collect:  
43 adherence data from CFHealthHub; exacerbations; FEV1 and ask participants the subjective  
44 adherence question until, 30th April 2017. At this point the study closes and the involvement  
45 of all participants ceases. After the trial ends (30/4/17), the aspiration is to allow participants  
46 in the control to have access to the intervention for which negotiations are ongoing. Currently  
47 funding is in place for the trial interventionists at study sites to deliver the intervention only  
48 over a 12-month period i.e. up to 30/4/17. It is anticipated that CFHealthHub used outside the  
49 trial would be delivered within the existing resources of the MDT so using CFHealthHub  
50 outside the trial should not need the trust to employ any additional staff members. As this is a  
51 pilot feasibility study where we are testing the intervention in participants, there is an  
52 expectation that further iteration of CFHealthHub may occur.  
53  
54  
55  
56  
57  
58  
59  
60

Figure 5. Behaviour change intervention flow chart



## 6.5 Usual care

Patients in both arms will receive usual care. Usual care is heterogeneous within and between centres, based on the needs of patients and the skills and interests of CF Unit staff. To better understand the configuration of usual care at participating centres a survey tool will be administered by the CTRU to the lead clinician at the centre. This will identify the spectrum of clinical and behaviour change interventions that are in use in the management and self-management of CF.

A minor component of the intervention is to train all members of the MDT in awareness of patient activation so that they are open to addressing issues raised for PWCF in the intervention arm. In addition, a staff member in the MDT will help to deliver the intervention. There is the possibility that the awareness of patient activation will have some effect on PWCF in both the intervention and control arms, and of leakage of the learning from the behaviour change component of the intervention to controls. We will investigate this possibility during the process evaluation.

Members of the MDT at each centre will receive one half-day, on-site, face-to-face training about the importance of objective nebuliser adherence data in the management of CF, and awareness of the importance of building patients' knowledge, skills and confidence to enable them to self-manage their treatment. This will include training in the interpretation of graphs and charts of objective adherence data produced by CFHealthHub, and the rationale for reducing target adherence in poor adherers in order to increase confidence. This will be delivered by designated members of the ACtiF research team.

Participants in the control arm will use a microchipped nebulizer but will not be able to access adherence data or other content and tools through CFHealthHub, neither will they receive the structured CFHealthHub intervention as described in the intervention manual. Control arm participants using Bi-neb nebulizers might have access to their data as part of routine care but this will not be in the user friendly format provided by the intervention.

One function of the qualitative research interviews with staff and control participants (see Section 8 below) is to understand the extent to which the patient activation awareness training has affected staff behaviour and whether control arm participants have received some aspects of the behaviour change intervention.

## 6.6 Criteria for discontinuing or modifying allocated interventions

There are no criteria for discontinuing treatment. Participants will be made aware that their participation is voluntary and they may discontinue study interventions, should they wish, at any time.

If a participant wishes to withdraw from treatment they will be able to speak to a member of the site study team i.e. ACtiF interventionist. This will be documented on a participant withdrawal form, within the Case Report Form. Any data already collected during the course of the trial up to the point of withdrawal will be used in the final analysis. We will ask the participants for their permission to continue to collect the primary outcome data i.e. CF exacerbations. The participant or clinician can make the decision to discontinue the allocated study intervention for any reason.

Participants will have the following options if they wish to withdraw:

1. Withdraw from the intervention i.e. intervention delivery visits only but will remain in the study. Patients can continue to use CFHealthHub. All study data would continue to be collected at subsequent follow up time points as per protocol.
2. Withdrawal from the study. Unless the patient objects, any data collected up to this point would be retained and used in the study analysis. The local interventionist would ask the participant if they agree to the collection of primary outcome data as defined in the protocol and or adherence data If

1 they agree to collection of adherence data, CTRU and or interventionist will continue to follow up  
2 participants for adherence data.  
3

- 4
- 5 3. Withdrawal from the trial entirely. Unless the patient objects, any data collected up to this point  
6 would be retained and used in the study analysis. If the patient does not wish to be contacted with  
7 regard to primary outcome data or adherence data, no further contact with regard to the study will be  
8 made. If the participant does specifically request for all their data to be removed information  
9 regarding the participant will be retained at site, as part of the patient notes, along with their  
10 withdrawal form and request to delete the data.  
11

12

13 A participant would be classed as complete if they have continued in the study until the last protocol defined  
14 visit, however there may be missing visits and / or data.  
15

### 16 ***Loss to Follow-Up***

17

18 A participant would be classed as lost to follow up if the participant has 1) not completed the study or 2)  
19 been withdrawn despite attempts for further contact, as per protocol, having been made. Unless the  
20 participant withdraws from the study entirely we will continue to collect the primary outcome data when  
21 possible (i.e. from medical notes).  
22

23

24 This withdrawal section has been developed in accordance with the CTRU Participant Discontinuation and  
25 Withdrawal of Consent Standard Operating Procedure (SSU003).  
26

## 27 **6.7 Strategies to improve adherence to intervention protocols**

### 28 **6.7.1 For health professionals**

29

30 The intervention protocols will be described in detail in an intervention manual. Interventionists will be  
31 trained to deliver the intervention according to the manual protocols. Interventionist training (as a form of  
32 behaviour change) will focus on Capability, Opportunity and Motivation. It will utilise evidence about the  
33 importance and likely effectiveness of the intervention and will challenge common misconceptions about  
34 adherence. Skills training and an introduction to the tools available on CFHealthHub will increase staff  
35 capability, and we will work with clinics and clinicians to ensure that the practical requirements for  
36 intervention delivery are in place: space, time etc (opportunity).  
37

38 CFHealthHub will record interventionist access to the site. It will also automatize some of the tailoring of  
39 the intervention according to the COM-BMQ which will be completed online. The contents of 'My Toolkit'  
40 will be recorded for each participant so that we will have records of what content they have been  
41 recommended. Interventionists will also be required to complete session records each time that they deliver  
42 the intervention to record the decisions made and the reasons for these,  
43  
44  
45  
46

### 47 **6.7.2 For patients**

48

49 Where participants provide consent we will send optional push notifications to encourage engagement with  
50 CFHealthHub. For example, we will send congratulatory messages when adherence improves, encouraging  
51 messages to remind participants to engage with the content. Face-to-face visits will, where possible be  
52 arranged to coincide with clinic visits as per usual care, therefore minimising the additional burden on  
53 participants.  
54  
55

## 56 **6.8 Relevant permitted / prohibited concomitant care**

57

58 No concomitant care will be denied based on the research protocol.  
59  
60

## 7. Outcomes

### 7.1 Feasibility outcomes ('stop-go' or 'success' criteria for RCT)

In line with proposed CONSORT extension for pilot studies [37], in this section, we state the criteria for success of the external pilot trial. The criteria are based on the primary feasibility objectives, which provide the basis for interpreting the results of the external pilot and for determining the feasibility of proceeding to the full-scale study scheduled for months 31 to 60 of the project. Depending on the funder's perspectives, the outcome of the external pilot might be:

- (i) "Stop - main study not feasible";
- (ii) "Continue, but modify protocol - feasible with modifications";
- (iii) "Continue without modifications, but monitor closely - feasible with close monitoring"; or,
- (iv) "Continue without modifications - feasible as is." [37]

We anticipate that modifications to the research protocol will be necessary as the feasibility study progresses. Some of the qualitative research will be undertaken early in the pilot trial and lessons learned about the trial procedures will be identified and acted on during the pilot trial. There are three objective stop-go criteria:

#### **1. Feasibility of recruitment to RCT**

Defined as recruitment of no fewer than 48 participants randomised at two centres over four months, 75% of the rate required in the main trial;

#### **2. Feasibility of retaining participants in the RCT**

Defined as attrition from the research protocol of no more than 15% of randomised participants at 5 (+/-1) months.

If these are met the full trial will go ahead. If these are not met overall, but are met in the last half of the pilot trial after trial procedures have been improved based on lessons learned from the early stage of the pilot trial, then the full trial will go ahead.

### 7.2 Process data relating to the implementation of the trial

#### **1. Number and characteristics of eligible patients approached for the study**

Collected by centres in screening logs and transferred to Prospect database

#### **2. Reasons for refused consent**

Collected by centres in screening logs and transferred to Prospect database.

#### **3. Reach**

How many participants are consented into the study, sub-grouped by socio-economic status (from CF Registry), as a proportion of:

- Those approached, expressed quantitatively, based on 'pre-screening' logs completed by ACTiF interventionist;
- Those known to be eligible, expressed quantitatively based on CF Registry.

#### **4. Participant attrition rate**

Collected by centres in screening logs and transferred to Prospect database.

### 5. *Reasons for attrition*

Collected by centres in screening logs and transferred to Prospect database.

### 6. *Maintenance:*

The processes by which participants are kept involved in the collection of key secondary outcome data research data:

- The extent to which adherence data is successfully uploaded from the chipped nebulisers , described quantitatively using CFHealthHub (Intervention arm only).

### 7. *Number of missing values/incomplete cases*

Assessed by data management team, based on data in Prospect database.

### 8. *Participant,/interventionist and members of MDT views on research protocols*

Assessed through qualitative interviews and to include:

- Barriers to recruitment, problems encountered in reaching participants [38];
- Perceived problems with trial procedures such as recruitment, informed consent etc.
- Acceptability
- Perceived utility and burden of outcome assessments.

### 9. *A survey on the content of usual care at participating centres*

A CTRU staff member will complete this survey with the principal investigator, a senior medic or delegate working at the participating centre.

## 7.3 Process data relating to the implementation of the intervention

### 1. *Context*

Definitions of ‘context’ tend to cluster around setting, roles, interactions and relationships [39]. It is important that context is understood as diachronic and emergent rather than synchronic and static [40, 41]. Frameworks for process evaluation have defined ‘context’ as:

- “aspects of the larger social, political, and economic environment that may influence intervention implementation” [42];
- “factors external to the intervention which may influence its implementation, or whether its mechanisms of impact act as intended” [43].

The context, and its interaction with implementation, mechanisms of impact, outcomes, the description of the intervention and its causal assumptions [43] will be described using qualitative data from research interviews, field notes, study management logs, minutes and e-mails. The focus will be how the context of individual CF Units affects implementation of the intervention and its potential outcomes.

### 2. *Implementation*

Definitions of ‘implementation’ tend to cluster around the processes or stages of adoption, the methods, means or social organisation of bringing innovative practices into use [39]. One way of describing the process of getting research into practice is to use a process model [44]. To structure our narrative of how the complex intervention was implemented we will use a process model called the Quality of Implementation Framework [45].

### 3. *Recruitment:*

Based on e-mails and minutes we will describe in narrative terms, the procedures used to approach and attract to the project NHS Trusts and interventionists [42].



#### 4. *Training:*

The comprehensiveness of the training component of the intervention for the health professionals delivering the intervention will be assessed by a combination of audio recordings of consultations and by interview.

#### 5. *Fidelity*

“The extent to which the intervention was delivered as planned. It represents the quality and integrity of the intervention as conceived by the developers. Fidelity is a function of the intervention providers.”[42]

- Interaction with participant along lines recommended by manual, determined by audio recordings of consultations between the interventionist and PwCF in the intervention arm.
- Recommendation of appropriate CFHealthHub tasks by interventionist, determined by audio recordings and by data from CFHealthHub;

The fidelity assessment will be developed and based on a tool used by Borelli et al [46].

#### 6. *Use [38] / dose received [42] of intervention*

Use of CFHealthHub by participant, as proposed by interventionist, determined by data capture by CFHealthHub, including the online activities started and completed, minutes spent on recommended pages and which parts the participant has picked out and put in a “my favourites” page. The number of times, frequency over time and duration with which users log on to CFHealthHub, as well as the activities they perform while logged in, described quantitatively using data from CFHealthHub.

A record of the discussion between the interventionist and the MDT will be kept. This will include who was there, brief notes of what was discussed and any agreement of treatment goals made.

#### 7. *Acceptability*

The acceptability of the intervention to hospital staff and PWCF assessed through semi-structured interviews.

#### 8. *Perceived benefits and harms*

Assessed through semi-structured interviews with health professionals and PWCF.

#### 9. *Leakage of intervention to controls*

Assessed through audio recordings of consultations between the MDT, interventionist, and PwCF in the control arm, and semi-structured interviews with PwCF in the control arm.

### 7.4 Clinical outcomes and covariates

The time schedule of enrolment, interventions (including any run-ins and washouts), assessments, and visits for participants can be found in Table 3 and Table 4 below.

#### 7.4.1 Primary clinical outcome

The primary clinical outcome is the number of pulmonary exacerbations in 5 (+/-1) month post-baseline follow-up period, defined according to the Fuchs criteria [47]. An exacerbation of respiratory symptoms will be said to have occurred when a patient was treated with parenteral antibiotics for **any one of the following 12 signs or symptoms** [48]:

1. change in sputum;
2. new or increased hemoptysis;
3. increased cough;
4. increased dyspnea;
5. malaise, fatigue, or lethargy;

6. temperature above 38 °C;
7. anorexia or weight loss;
8. sinus pain or tenderness;
9. change in sinus discharge.
10. change in physical examination of the chest, derived from notes by site staff.
11. decrease in pulmonary function by 10 percent or more from a previously recorded value, derived from notes by site staff; or,
12. radiographic changes indicative of pulmonary infection, derived from notes by site staff.

The trial interventionist or prescribing clinician/nurse will collect data on the “exacerbations” form at the point of a participant starting a course of IV antibiotics.

#### 7.4.2 Secondary clinical outcomes

1. **Body Mass Index (BMI).**
2. **Forced expiratory volume in 1 second (FEV<sub>1</sub>):** standardised spirometry as a measure of condition severity [49].
3. **EuroQol EQ-5D-5L:** generic health status measure for health economic analysis [50].
4. **The Patient Activation Measure (PAM-13) (Health Style Assessment):** assessment of patient knowledge, skill, and confidence for self-management [51]. \*PAM-13 was labelled as “Health Style Assessment” following a request from the licence owners to ensure the purpose of the questionnaire is clear for participants.
5. **Assessment of routine :** measure of life chaos [52].
6. **Self-Report Behavioural Automaticity Index (SRBAI):** automaticity-specific subscale of the Self Report Habit index to capture habit-based behaviour patterns [53].
7. **Cystic Fibrosis Questionnaire-Revised (CFQ-R):** disease specific health-related quality of life instrument [54].
8. **The Patient Health Questionnaire depression scale (PHQ-8):** severity measure for depressive disorders [55].
9. **MAD (Medication Adherence Data-3 items) :** medication adherence measure
10. **The General Anxiety Disorder 7-item anxiety scale (GAD-7):** severity measure for anxiety [56].
11. **The Capability Opportunity Motivation Behaviour Beliefs Questionnaire (COM-BMQ):** This questionnaire incorporates:
  - a. **The Beliefs about Medicines Questionnaire - specific (Nebuliser adherence) (BMQ 21-item):** a validated self-report tool[57], customised by the author to identify perceived necessities and concerns for nebuliser treatment.
  - b. The following project-specific items: one additional belief item, one intention item, one confidence item, and a list of barriers. These will serve as a tailoring tool for the intervention and also as a secondary outcome measure.
12. **Subjective adherence single question:** self-report estimate of adherence as a percentage. Self-reported problems: identification of capability and opportunity barriers to nebuliser adherence

- 1  
2  
3 13. **Concomitant medications:** bespoke instrument, designed for this research project.  
4  
5 14. **Resource use form:** interventionist collects data from a combination of hospital notes and the NHS  
6 patient electronic system to determine 1) inpatient IV days 2) Routine clinic visits 3) Unscheduled  
7 outpatient contacts 3) unscheduled inpatient stays.  
8  
9 15. **Exploratory analysis of habit formation:** analyses with the objective nebuliser data will be  
10 performed to explore the process of habit formation with the delivery of the adherence intervention  
11  
12 16. **Prescription:** a monthly prescription check to both check for data transfer to CFHealthHub and  
13 review for an indication that the prescription has changed or indication of microorganism e.g.  
14 pseudomonas (please see table 2 and 3 and refer to section 10.1.1).  
15  
16  
17 17. **Adherence to prescribed medication (see 7.4.3)**  
18  
19 18. **Any treatment with IV antibiotics**  
20  
21  
22

### 23 7.4.3 Adherence to prescribed medication

24  
25 Adherence to prescribed medication will be defined in several ways including:

- 26  
27  
28 1. Unadjusted adherence  
29 2. Simple normative adherence (without numerator adjustment)  
30 3. Sophisticated normative adherence (without numerator adjustment)  
31 4. Simple normative adherence (with numerator adjustment)  
32 5. Sophisticated normative adherence (with numerator adjustment)  
33  
34

35 Further detail about the outcomes will be reported in the trial statistical analysis plan.  
36  
37  
38  
39  
40  
41  
42  
43  
44  
45  
46  
47  
48  
49  
50  
51  
52  
53  
54  
55  
56  
57  
58  
59  
60

**Table 3. Individual-level data derived from PWCF and sites**

|                                                                                                                                                                                                                                                                                                                                                                                                               | Where?   | Completed by? | Consent visit | Baseline (intervention) visit | At clinic visits | Exacerbations episode | 5 months (+/- 1 month) from consent visit | Up to 30 <sup>th</sup> April 2017 |
|---------------------------------------------------------------------------------------------------------------------------------------------------------------------------------------------------------------------------------------------------------------------------------------------------------------------------------------------------------------------------------------------------------------|----------|---------------|---------------|-------------------------------|------------------|-----------------------|-------------------------------------------|-----------------------------------|
| <b>Enrolment</b>                                                                                                                                                                                                                                                                                                                                                                                              |          |               |               |                               |                  |                       |                                           |                                   |
| Pre-screening form (before 1 <sup>st</sup> visit)                                                                                                                                                                                                                                                                                                                                                             | Prospect | Site          | -             | -                             | -                | -                     | -                                         | -                                 |
| Confirmation of eligibility form                                                                                                                                                                                                                                                                                                                                                                              | Prospect | Site          | ●             | -                             | -                | -                     | -                                         | -                                 |
| Informed consent                                                                                                                                                                                                                                                                                                                                                                                              | Prospect | Site          | ●             | -                             | -                | -                     | -                                         | -                                 |
| Intravenous days in last registry year                                                                                                                                                                                                                                                                                                                                                                        | Prospect | Site          | ●             | -                             | -                | -                     | -                                         | -                                 |
| Pseudomonas status +                                                                                                                                                                                                                                                                                                                                                                                          | Prospect | Site          | ●             | -                             | -                | -                     | -                                         | -                                 |
| <b>Primary outcome</b>                                                                                                                                                                                                                                                                                                                                                                                        |          |               |               |                               |                  |                       |                                           |                                   |
| Exacerbations form including:<br>Parenteral antibiotics<br>Change in sputum*<br>New or increased hemoptysis*<br>Increased cough*<br>Increased dyspnea*<br>Malaise, fatigue, or lethargy*<br>Temperature above 38 °C*<br>Anorexia or weight loss*<br>Sinus pain or tenderness*<br>Change: sinus discharge*<br>Change: phys. exam. chest*<br>Decrease: pulmonary function *<br>Indicative radiographic changes* | Prospect | Site          | ●             | -                             | -                | ●                     | ●                                         | ●                                 |
| <b>Secondary outcomes</b>                                                                                                                                                                                                                                                                                                                                                                                     |          |               |               |                               |                  |                       |                                           |                                   |
| BMI (height and weight)                                                                                                                                                                                                                                                                                                                                                                                       | Prospect | Site          | ●             | -                             | -                | -                     | ●                                         | -                                 |
| FEV <sub>1</sub>                                                                                                                                                                                                                                                                                                                                                                                              | Prospect | Site          | ●             | -                             | ●                | -                     | ●                                         | ●                                 |
| EQ-5D-5L**                                                                                                                                                                                                                                                                                                                                                                                                    | Prospect | PWCF          | ●             | -                             | -                | ●                     | ●                                         | -                                 |
| PAM-13(Health Style Assessment)                                                                                                                                                                                                                                                                                                                                                                               | Prospect | PWCF          | ●             | -                             | -                | -                     | ●                                         | -                                 |
| Assessment of Routine                                                                                                                                                                                                                                                                                                                                                                                         | Prospect | PWCF          | ●             | -                             | -                | -                     | ●                                         | -                                 |
| SRBAI                                                                                                                                                                                                                                                                                                                                                                                                         | Prospect | PWCF          | ●             | -                             | -                | -                     | ●                                         | -                                 |
| CFQ-R                                                                                                                                                                                                                                                                                                                                                                                                         | Prospect | PWCF          | ●             | -                             | -                | -                     | ●                                         | -                                 |
| PHQ-8                                                                                                                                                                                                                                                                                                                                                                                                         | Prospect | PWCF          | ●             | -                             | -                | -                     | ●                                         | -                                 |
| GAD-7                                                                                                                                                                                                                                                                                                                                                                                                         | Prospect | PWCF          | ●             | -                             | -                | -                     | ●                                         | -                                 |
| MAD-3 (Medication Adherence Data-3 items)                                                                                                                                                                                                                                                                                                                                                                     | Prospect | PWCF          | ●             | -                             | -                | -                     | ●                                         | -                                 |
| COM-BMQ                                                                                                                                                                                                                                                                                                                                                                                                       | Prospect | PWCF          | ●             | -                             | -                | -                     | ●                                         | -                                 |
| Objective adherence                                                                                                                                                                                                                                                                                                                                                                                           | CFHH     | CFHH          | ●             | -                             | ●                | -                     | ●                                         | -                                 |
| Subjective adherence single question                                                                                                                                                                                                                                                                                                                                                                          | Prospect | PWCF          | ●             | -                             | ●                | -                     | ●                                         | ●                                 |
| Concomitant medications                                                                                                                                                                                                                                                                                                                                                                                       | Prospect | Site          | ●             | -                             | -                | -                     | ●                                         | -                                 |
| Other SAEs                                                                                                                                                                                                                                                                                                                                                                                                    | Prospect | Site          | -             | -                             | ●                | -                     | ●                                         | -                                 |
| Resource use                                                                                                                                                                                                                                                                                                                                                                                                  | Prospect | Site          | -             | -                             | -                | -                     | ●                                         | -                                 |

+ Pseudomonas (or other microorganism) status will be checked together with the monthly prescription

\* Only required where PWCF indicates they have received parenteral antibiotics

\*\* EQ5D-5L collected at the start and end of every exacerbation episode

**Table 4. CFHealthHub data (research arm only)**

|                                                                                                 | Completed by?          | Baseline (intervention) visit | At intervention visit s with interventionist | Between sessions | At clinic visits | 5 months (+/- 1 month) from consent visit | Up till 30th April 2017 |
|-------------------------------------------------------------------------------------------------|------------------------|-------------------------------|----------------------------------------------|------------------|------------------|-------------------------------------------|-------------------------|
| <b>Clinician metrics</b>                                                                        |                        |                               |                                              |                  |                  |                                           |                         |
| Adherence data*                                                                                 | PWCF                   | ●                             | ●                                            | ●                | ●                | ●                                         | ●                       |
| Recommendation of modules by interventionist                                                    | Interventionist        | ●                             | ●                                            | -                | ●                | -                                         | X                       |
| Feed back to participant their adherence data screens (data click)                              | Interventionist        | ●                             | ●                                            | -                | ●                | -                                         | X                       |
| Check prescription with participant                                                             | Interventionist        | ●                             | ●                                            | -                | ●                | -                                         | X                       |
| Order of clicks                                                                                 | CFHH                   | ●                             | ●                                            | -                | ●                | -                                         | X                       |
| Interventionist responds to patient changing prescription                                       | Interventionist        | -                             | ●                                            | ●                | ●                | ●                                         | X                       |
| Monthly check on prescription +                                                                 | Interventionist / CTRU | ●                             | ●                                            | ●                | ●                | ●                                         | X                       |
| Time in and out preparation                                                                     | Interventionist /CFHH  | ●                             | ●                                            | -                | -                | ●                                         | X                       |
| Time in and out with patient                                                                    | Interventionist /CFHH  | ●                             | ●                                            | -                | -                | ●                                         | X                       |
| Time in and out review                                                                          | Interventionist /CFHH  | ●                             | ●                                            | -                | -                | ●                                         | X                       |
| <b>Patient metrics</b>                                                                          |                        |                               |                                              |                  |                  |                                           |                         |
| Adherence (number of nebulized doses taken per day.) <sup>1</sup>                               | PWCF                   | ●                             | ●                                            | ●                | ●                | ●                                         | X                       |
| Duration of inhalation                                                                          | Nebuliser              | ●                             | ●                                            | -                | -                | -                                         | X                       |
| Accessing CFHealthHub – look at adherence data                                                  | PWCF                   | ●                             | ●                                            | -                | -                | -                                         | X                       |
| Accessing CFHealthHub – look at ‘My Toolkit’                                                    | PWCF                   | ●                             | ●                                            | -                | -                | -                                         | X                       |
| Accessing CFHealthHub problem solving / education / talking heads pages outside of ‘My Toolkit’ | PWCF                   | ●                             | ●                                            | -                | -                | -                                         | X                       |
| Accessing CF HealthHub – first to last click in a session                                       | PWCF                   | ●                             | ●                                            | -                | -                | -                                         | X                       |

\*Adherence data collected for both research and control arms

+ Monthly prescription checked by CTRU centrally to alert local interventionists to any potential changes in control arm and potentially also intervention arm

X data continued to be collected in CFHealthHub and interventionist responds for those participants who have “opted in” to receive intervention till 30/4/17

<sup>1</sup>To be broken down in statistical analysis plan.

**Figure 6. Participant timeline for the external pilot RCT**

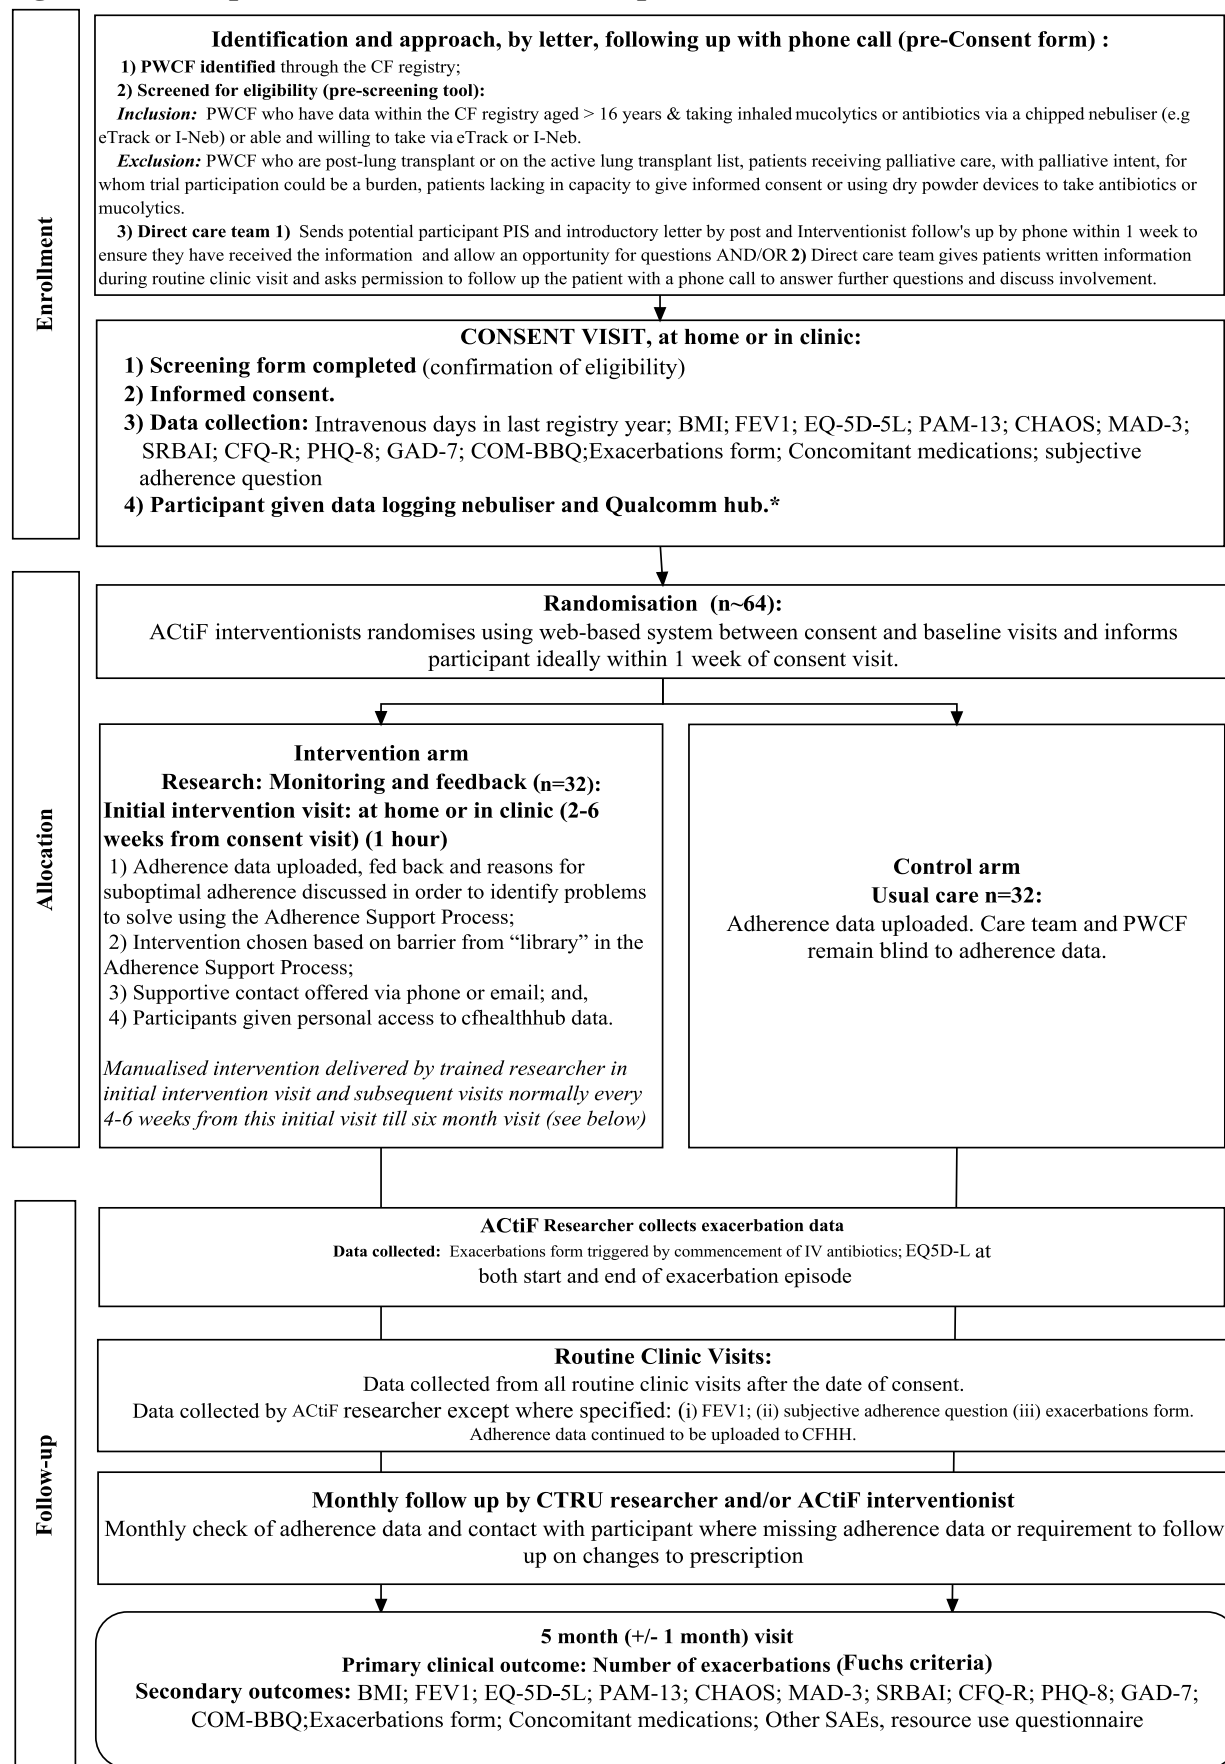

\*When I-nebs are converted to Bi-nebs a representative from the company (Philips) will do this between the consent visit and first intervention visit.

1 The study recognises that flexibility in accommodating participant schedules may cause time windows to  
2 change but this will allow us to adapt the intervention for the main RCT.  
3

## 4 **8. Sampling**

### 5 **8.1 Quantitative components**

#### 6 **8.1.1 Sites**

7 Two large specialist CF centres have been screened for their ability to recruit participants based on the  
8 number of participants they have on their CF registry and their motivation to participate in the pilot trial.  
9

#### 10 **8.1.2 Sample size**

11 The sample size for a feasibility study should be adequate to estimate the uncertain critical parameters  
12 (standard deviations for continuous outcomes; consent rates, event rates, attrition rates for binary outcomes)  
13 needed to inform the design of the full RCT with sufficient precision [37, 58–60]. For the main RCT, the  
14 target sample size is 688 participants (344 per arm). We are proposing that 15 CF units recruit on average 46  
15 patients in six months, a recruitment rate of approximately eight patients per centre per month.  
16

17 To assess whether this recruitment rate is feasible the external pilot RCT will open in two CF units for 12  
18 months, with four months recruitment, one months ‘run-in’ period (the period between the consent and  
19 baseline visit), and 5 (+/-1) months follow up. To match the proposed recruitment rate of the main RCT, the  
20 target sample over the four months for which the pilot RCT is open, will be 32 per centre (64 in total from  
21 the two pilot centres). We propose to recruit to time, that is for a fixed period of four months rather than to a  
22 fixed sample size. We would want to see a minimum of 75% of the recruitment target to be confident of the  
23 trial viability i.e. at least 48 patients in total consented and randomized in four months’ of recruitment from  
24 two centres.  
25

#### 26 **8.1.3 Approach, non-participation and recruitment**

27 **Approach:** Health professionals involved in approaching and screening PWCF and collecting data will be  
28 trained in the study protocol and procedures. Additionally those taking consent will have up-to-date training  
29 in Good Clinical Practice (GCP). All study personnel will be named on the study delegation log. Health  
30 professionals working with the CF team will identify a sample of PWCF registered at the centre via the CF  
31 registry database locally. All inclusion and exclusion criteria will be assessable via patient records and they  
32 will exclude any patients who do not fit the eligibility criteria.  
33

34 A member of the participant’s direct clinical team will send the potential participant a PIS and introductory  
35 letter by post or give the written information during a routine clinic visit. A sticker with a website address  
36 and Quick Response code will be placed in the envelope both of which will link to a video of the researcher  
37 explaining the study. If information is provided in a routine clinic visit, the clinical care team will seek  
38 permission for the ACTiF Interventionist to follow up with a phone call in order to answer any further  
39 questions and discuss involvement. Written informed consent may be conducted at this visit where the  
40 participant is happy to take part as this is a low risk trial.  
41

42 **Telephone call:** Up to a week after posting out the information, the ACTiF Interventionist will telephone the  
43 PWCF to discuss the study over the phone and answer any questions. If the potential participant is happy to  
44 take part, the ACTiF Interventionist will arrange an appointment to gather written informed consent.  
45

46 **Non-participation:** Spontaneously offered reasons for non-participation in the trial will be recorded.  
47  
48  
49  
50  
51  
52  
53  
54  
55  
56  
57  
58  
59  
60

## 8.2 Qualitative components

*At each of the two pilot sites* we will undertake:

- Audio-recordings of all 16 initial assessments for PWCF in the intervention arm and 10-12 consultations between the senior interventionist from the MDT (or other MDT member) and PWCF in the control arm. Numbers will depend on numbers of PWCF giving written consent for this.
- 10-12 semi-structured face-to-face (or telephone or skype) interviews with PWCF receiving the intervention and 10-12 semi-structured face-to-face interviews with PWCF in the control arm (total n~40-48 PWCF; n~40-48 interviews);
- two semi-structured face-to-face (or telephone or skype) interviews with each of the two interventionists in each centre (total n=4 interventionists; n=8 interviews); and,
- two semi-structured (face to face, telephone or skype) interviews with two members of the MDT (total n=4 staff; n=8 interviews).

Written informed consent will be obtained from both the interventionist and the PWCF participating in the audio recording when they consent to be in the study. Separate consent will be sought from PWCF and interventionists or members of the wider CF team for semi-structured interviews.

## 9. Assignment of interventions

### 9.1 Sequence generation

Participants will be allocated in equal proportions to one of the two groups using a computer generated pseudo-random list, stratified by centre and the number of days participants have been on IV antibiotics in the previous 12 month period as collected at consent visit, with random permuted blocks of varying sizes. The two categories for stratification within the number of IV days will be (i) less than or equal to 14 days and (ii) greater than 14 days.

### 9.2 Allocation concealment

The allocation sequence will be hosted by the Sheffield CTRU in accordance with their standard operating procedures and will be held on a secure server. Access to the allocation sequence will be restricted to those with authorisation. The sequence will be concealed until recruitment, data collection, and analyses are complete.

### 9.3 Implementation

The allocation sequence will be created by a Sheffield CTRU statistician who is not otherwise associated with the trial. At the consent visit, a health professional who is named on the delegation log, will go over the patient information sheet again with the study candidate and answer any questions. If the PWCF is still willing to enter the trial, they obtain full written consent and complete the eligibility form. If the participant is eligible, then baseline assessments will be taken. The recruiting health professional will log into the remote, secure Internet-based randomisation system and enter basic demographic information, after which the allocation will be revealed.

### 9.4 Blinding

After revelation of the allocation, only the statisticians will be blinded to allocation as per CTRU SOPs (ST001 and ST005)



## 10. Data collection, management and analysis

### 10.1 Quantitative data

#### 10.1.1 Data collection methods

**Data handling and record keeping.** The Sheffield CTRU will oversee data collection, management and analysis and ensure the trial is undertaken according to Good Clinical Practice Guidelines and CTRU standard operating procedures. Data will be collected and retained in accordance with the Data Protection Act 1998. Patients will be reassured that all data which are collected during the course of the research will be kept strictly confidential.

The study team will train those collecting data in the study procedures before the trial begins. Data will either be collected directly from the participants, carers, interventionist, CFHealthHub or from source documents (e.g. patient notes) and input onto the CRF or Sheffield CTRU's electronic web-based data capture system (Prospect). The Data Monitoring and Management Plan for the study will provide further guidance on the types and levels of data and how these will be monitored and verified. Some essential documents may be posted to the central team to facilitate this e.g. participant consent forms in which case this will be detailed in the appropriate participant PIS and consent forms.

The CTRU will perform checks with the participant via monthly phone calls to ensure data is being captured and alert the local interventionist if there is an indication of a prescription change and a need to check pseudomonas (or other microorganism) status. This is required for the correct denominator to assess "normative adherence". Data will be extracted from the CF registry to understand exacerbations in the preceding 12 months since prior exacerbations can have a bearing on the optimum target regimen.

#### **Plans to promote participant retention and complete follow-up.**

Participant retention will be ensured by the following procedure:

1. At each point of contact, the interventionist will check with the participant that the Qualcomm hub or Smartphone hub is plugged in and turned on. A member of CTRU who is performing data and prescription checks may alert the interventionist. They will remind the participant of the proximity required for data transfer (10 metres)
2. In the event of no data being displayed in CFHealthHub for a period of at least a week (and the participant is not known to be on holiday) the interventionist will make contact with the participant (Email/Text/Telephone call) to check that the following
  - That the Qualcomm or Smartphone hub is plugged in
  - That the Qualcomm hub is working (showing solid green and yellow lights on the display)
  - That they have been within range of the Qualcomm hub sufficient to facilitate data transfer (10 metres)
  - That the Smartphone hub is switched on (showing the locked 'password' screen when any button is pressed)
  - That the Bi-neb and Smartphone hub have been kept in the same room, or at least have been in close proximity at some point during the day.

Any participants using the Bi-neb who are still experiencing issues after following the steps above, may receive a face to face or telephone support (at home or hospital) from the clinical trainer to resolve any outstanding issues.

#### **Troubleshooting:**

1 Data capture will be monitored both by interventionist at the site and centrally by the CTRU. In the event of  
2 data not being uploaded patients will be contacted to trouble shoot problems. Patients will be offered support  
3 to suit their circumstances including home visits (conducted by the members of the site research team) where  
4 necessary.  
5  
6  
7

### 8 **10.1.2 Data Management**

9 Anonymised trial data will be entered onto a validated database system designed to an agreed specification  
10 between the Chief Investigator and Sheffield CTRU. The research staff at sites (mainly the ACTiF  
11 interventionist) will be responsible for data entry locally. The Sheffield CTRU Trial Manager, research  
12 assistant and the Data Management Team will work with sites to ensure the quality of data provided. The  
13 study manager, research assistant, data manager, PI's, any research nurses and site interventionist will have  
14 access to the anonymised data on the database through the use of usernames and encrypted passwords. The  
15 system has a full electronic audit trail and will be regularly backed up. The secure data management system  
16 will incorporate quality control procedures to validate the study data. Error reports will be generated where  
17 data clarification is needed. Output for analysis will be generated in a format and at intervals to be agreed  
18 between Sheffield CTRU and the Chief Investigator.  
19  
20  
21

22 Trial documents will be retained in a secure location during and after the trial has finished. The study will  
23 use the CTRU's in-house data management system (Prospect) for the capture and storage of participant data.  
24 Prospect stores all data in a PostgreSQL database on virtual servers hosted by Corporate Information and  
25 Computing Services (CiCS) at the University of Sheffield. Prospect uses industry standard techniques to  
26 provide security, including password authentication and encryption using SSL/TLS. Access to Prospect is  
27 controlled by usernames and encrypted passwords, and a comprehensive privilege management feature can  
28 be used to ensure that users have access to only the minimum amount of data required to complete their  
29 tasks. This can be used to restrict access to personal identifiable data.  
30  
31  
32

33 Participants who give consent to the qualitative part of this study will also give consent to their name and  
34 address to be given to the University of Sheffield qualitative research staff in order to be contactable.  
35

### 36 **10.1.3 Data quality assurance**

37 Prospect provides a full electronic audit trail, as well as validation and verification features which will be  
38 used to monitor study data quality, in line with CTRU SOPs and the Data Management Plan (DMP). Error  
39 reports will be generated where data clarification is required. Rates of missing data and data points which are  
40 out of the expected or allowed range will be presented to the team at monthly management group meetings.  
41  
42  
43  
44  
45  
46  
47  
48  
49  
50  
51  
52  
53  
54  
55  
56  
57  
58  
59  
60

## 10.2 Qualitative data

### 10.2.1 Audio recordings of consultations

All initial assessments will be audio recorded with permission (n=16 in each site). Findings from early assessments will be fed back to the interventionist so that changes can be made to the intervention delivery before subsequent assessments. Consultations between the senior interventionist and PWCF in the control arm will be audio recorded with permission (n=10-12 in each site). Encrypted digital recorders will be used and recordings sent securely to the research team for analysis.

### 10.2.2 Semi-structured interviews: participants

In each site we will interview 3-4 PWCF receiving the intervention who are recruited at the beginning of the pilot. We will interview them around one month into the intervention to seek views of the most intensive part of the intervention. This will identify any problems early and be fed back to the intervention development team, staff delivering the intervention, and trial staff. We will interview 5-6 PWCF around four to six months into the intervention. These PWCF will have experienced more independent use of the CFHealthHub and we can explore how to keep PWCF engaged with the intervention in the longer term. We will interview 2-3 PWCF who drop out of the intervention to explore why this occurred. We will interview 10-12 PWCF in the control arm around four to six months into the trial to explore whether they have experienced aspects of patient activation and leakage of the intervention.

### 10.2.3 Semi-structured interviews: professionals

The first interviews with the interventionist and senior interventionist in each site will take place after they have undertaken assessments with the first few PWCF to identify teething problems with the intervention or the trial and the comprehensiveness of the training sessions they received. The findings will be fed back to the team to consider whether changes are needed to the intervention or trial protocol. The second interviews will take place when the first few PWCF have completed the intervention to allow the interventionist to reflect back over the whole process. The interventionists may have different lengths of experience of working with CF, nebulisers or behaviour change and we will consider the influence of differences in backgrounds on their ability to implement the intervention.

We will also undertake interviews with two members of the MDT at each centre when the first few PWCF have received 2-3 months of the intervention and then again towards the end of the feasibility study when all PWCF have been recruited and received around 3 months of the intervention.

### 10.2.4 Undertaking the interviews

For the interviews we have developed topic guides based on our research questions and these are attached to the application. Topic guides develop throughout any qualitative interview study and our topic guides may change as the study progresses. We will audio record all interviews after receiving written permission to do so. We will use an encrypted digital recorder. Reflexive notes will be made during and after the interviews. We expect

1  
2  
3 interviews to last around one hour. We do not expect data saturation in pilot studies; the aim  
4 is to identify any learning that can be addressed in preparation for the full trial.  
5  
6

## 7 **11. Data analysis**

### 8 **11.1 Quantitative analysis**

9  
10 The analysis will be performed after data lock by a CTRU statistician under the supervision  
11 of the senior study statistician. As the trial is a pragmatic parallel group RCT data will be  
12 reported and presented according to the CONSORT 2010 statement [61] with reference to  
13 proposed extension for pilot / feasibility studies [37]. As a pilot/feasibility study the main  
14 analysis will be mainly descriptive and focus on confidence interval estimation and not  
15 formal hypothesis testing [58]. We will report rates of consent, recruitment and follow-up  
16 by centre and by randomized group.  
17  
18  
19

20  
21 Clinical outcome measures will be summarised overall and by randomized group. Baseline  
22 demographic (age, gender), physical measurements (e.g. weight, height, BMI), and patient  
23 reported outcome measures (EQ-5D, PAM-13, Assessment of Routine, MAD-3, SRBAI,  
24 CFQ-R, GAD-7, COM-BMQ, PHQ-8), and clinical measurements (e.g. FEV1, IV days in  
25 last registry year ) will be described and summarised overall and for both treatment groups.  
26  
27

28 The primary outcome is the number of pulmonary exacerbations treated with IV antibiotics  
29 over the 6 month post-randomisation follow-up period. We will also include, as part of the  
30 feasibility analysis, estimation of the effect size for the 6-month pulmonary exacerbations  
31 outcome with 95% confidence interval estimates to check that the likely effect is within a  
32 clinically relevant range (as confirmation that it is worth progressing with the full trial). For  
33 this we will use a Poisson generalised linear model (GLM). Secondary continuous outcomes  
34 such as six-month post randomisation FEV1, BMI EQ-5D, PAM-13, Assessment of  
35 Routine, MAD-3, SRBAI, CFQ-R, GAD-7, COM-BMQ, PHQ-8) will be analysed with a  
36 multiple linear regression model with the baseline value of the outcome and randomised  
37 group as covariates. The treatment group coefficient and its associated 95% confidence  
38 interval will be reported from the various multiple linear regression models. The mean level  
39 of adherence (to prescribed medication) between the intervention and control groups over  
40 the 6 month post-randomisation follow-up period will also be reported and compared  
41 between the groups and a 95% confidence interval (CI) for the mean difference in this  
42 parameter between the randomised groups will also be calculated.  
43  
44  
45  
46

47 Further analyses with the objective nebuliser data will be performed to explore the process  
48 of habit formation with the delivery of the adherence intervention. The analyses will  
49 include:  
50

- 51 (a) generating objective habit scores by taking into account time of nebuliser use
- 52 (b) using statistical process control to identify when periods of stability is achieved
- 53 (c) other time-series methods, including cross-correlation between habit scores and  
54 adherence.  
55

56 Adverse events will be based on serious adverse events (SAE) case report forms. A serious  
57 adverse event is defined as any adverse event or adverse reaction that results in death, is life-  
58 threatening, requires hospitalisation or prolongation of existing hospitalisation, results in  
59 persistent or significant disability or incapacity, or is a congenital anomaly or birth defect.  
60

1  
2  
3 The following summaries will be presented as overall rates and stratified by AE  
4 classification:  
5

- 6 • the number and percentages of patients reported as having Serious Adverse Events  
7 (SAE) in each treatment arm; and,  
8
- 9 • the number and percentages recorded as having all forms of Adverse Events (AE) in  
10 each arm.  
11  
12

13 This information along with the acceptability of the study design and protocol to  
14 patients/GPs; the safety of the intervention; patient recruitment and attrition/retention rates  
15 will enable us to determine whether or not the definitive RCT is feasible within a  
16 satisfactory timescale and cost envelope using UK centres alone.  
17  
18  
19

## 20 **11.2 Qualitative analysis**

21 Transcripts will be coded using the latest version of NVivo (QSR International). The  
22 analysis will use the National Centre for Social Research 'Framework' approach [62]. AO'C  
23 and SD will undertake the following stages of the analysis of patient transcripts:  
24 familiarisation; identifying a thematic framework; indexing; charting; and, mapping and  
25 interpretation. The theoretical framework for understanding intervention adherence is the  
26 Necessities-Concerns framework [63] within the COM-B system [18]. This will be used  
27 within the thematic framework. We will use the process evaluation functions of context,  
28 mechanisms and implementation to frame the analysis [43]. Within mechanisms we will use  
29 the COM-B system as stated above and consider the use of the Theoretical Domains  
30 Framework [36]. We will compare and contrast findings from each site because the different  
31 backgrounds of the interventionists, and the different contexts in which care is provided in  
32 each CF unit, may affect implementation and acceptability of the intervention.  
33  
34  
35  
36  
37

### 38 **Figure 7. Assumptions of the MRC Guidance on Process Evaluation**

39  
40 [39, 64]  
41  
42  
43  
44  
45  
46  
47  
48  
49  
50  
51  
52  
53  
54  
55  
56  
57  
58  
59  
60

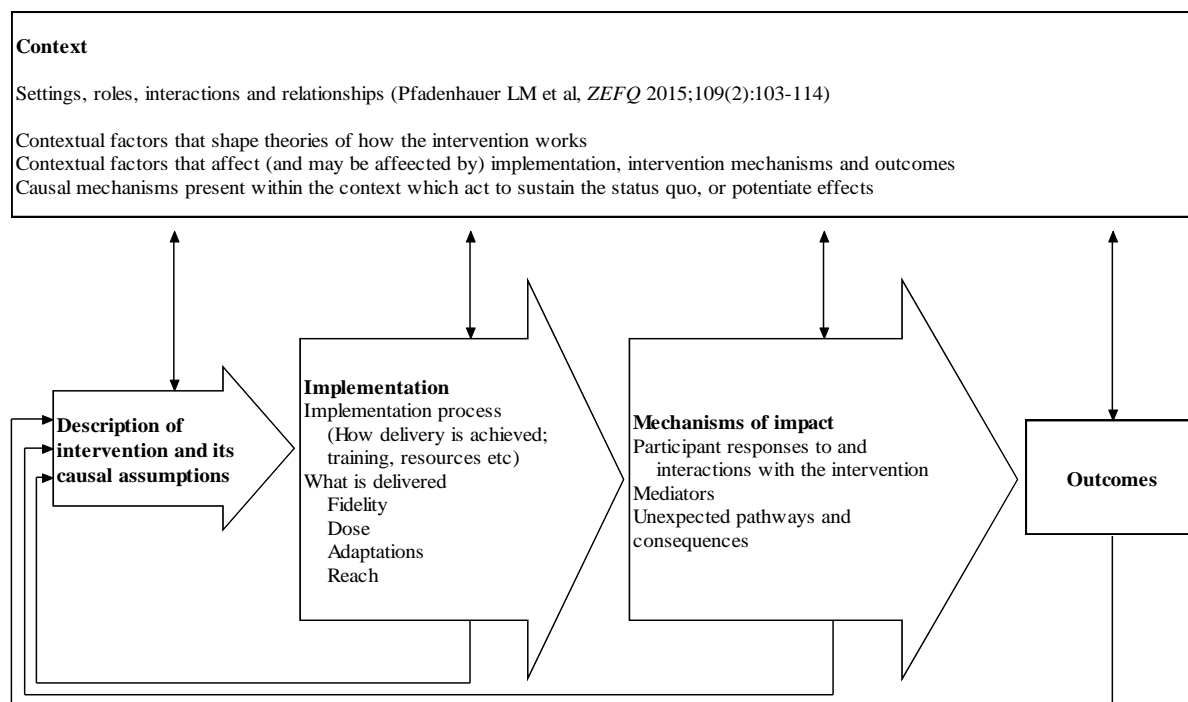

This qualitative research will:

- Inform the refinement of the intervention (e.g. CFHealthHub, training of interventionists, initial assessments, manualised instructions) and its implementation (e.g. introduction within a CF Unit) for use in the full trial.
- Inform refinement to trial procedures for the full trial.
- Inform the selection of the final secondary measures used in the full trial to ensure they address the perceived benefits of the intervention.
- Help to understand the extent of any leakage of the intervention to controls.

### 11.3 Combining data and findings from the different components

We will use Farmer's triangulation protocol to display the findings from each component of the study together and discuss as a team the extent to which findings converge, complement each other or contradict each other [65, 66]. For example, we will display all findings about recruitment together to consider the feasibility of recruitment for the full trial and the actions required to ensure feasibility. We will also display in a matrix the qualitative and quantitative data for individual PWCF who have received the intervention and been interviewed [66]. We will use this to consider the extent to which our secondary outcome measures identify issues raised by PWCF in the interviews.

## 12. Monitoring

### 12.1 Oversight

The CTRU SOP GOV003 Data Monitoring and Ethics Committee states "A DMEC does not need convening in studies that carry low risk to patients". This project involves

1  
2  
3 delivering a behaviour change intervention through the website CFHealthHub and would  
4 therefore be classified as low risk.  
5

6 The overall responsibility for the study will be with Sheffield Teaching Hospitals NHS  
7 Trust who will act as sponsors for the study. The local Principal Investigator (PI) will be  
8 responsible for the study at each participating site and it will be registered and approved  
9 with each local R&D department. The study will be conducted in accordance with the  
10 protocol, GCP and Sheffield CTRU Standard Operating Procedures. The two committees  
11 which will govern the conduct of the study are:  
12  
13

- 14 1. Programme Steering Committee (PSC)
  - 15 2. Project Management Group (PMG)
- 16  
17

18 The PSC will be responsible for the overall conduct of the trial and consists of an  
19 independent chair and four other independent members including a statistician and PPI  
20 representative. The committee will meet every 6 months to monitor the study.  
21  
22

23 The PMG will comprise of the trial manager and the core research team . The PMG will  
24 meet on a monthly basis to monitor the day-to-day running of the trial. The Trial Manager  
25 will be jointly supervised by the CI and the Assistant Director of CTRU via the form of  
26 regular meetings (face to face and telephone calls). The Trial Manager will be responsible  
27 for liaising with the whole project team. Trial monitoring procedures will be assessed  
28 based on the level of risk of the study. The Site Monitoring Plan will outline the types and  
29 frequency of site monitoring activities for the study and this will be agreed with the  
30 Sponsor prior to the start of the study.  
31  
32

## 33 **12.2 Description of any interim analyses and stopping guidelines**

34 There are no planned interim analyses or stopping guidelines for this study.  
35  
36  
37  
38

## 39 **12.3 Harms (safety assessments)**

### 40 **12.3.1 Serious Adverse Events**

41 Trial sites are to report Serious Adverse Events (SAEs) in conjunction with the CTRU  
42 standard operating procedure PM004 (Adverse events and serious adverse events). The  
43 definition of an SAE is as follows:  
44  
45

- 46 • results in death;
  - 47 • is life-threatening\* (subject at immediate risk of death);
  - 48 • requires in-patient hospitalisation or prolongation of existing hospitalisation;\*\*
  - 49 • results in persistent or significant disability or incapacity;
  - 50 • consists of a congenital anomaly or birth defect; or,
  - 51 • is another important medical event that may jeopardise the subject.\*\*\*
- 52  
53

54 \* 'life-threatening' refers to an event in which the patient was at risk of death at the time of  
55 the event; it does not refer to an event which hypothetically might have caused death if it  
56 were more severe.  
57

58 \*\*Hospitalisation is defined as an inpatient admission, regardless of length of stay, even if  
59 the hospitalisation is a precautionary measure for continued observation. Hospitalisations  
60

1  
2  
3 for a pre-existing condition, including elective procedures that have not worsened, do not  
4 constitute an SAE.

5 \*\*\*Other important medical events that may not result in death, be life-threatening, or  
6 require hospitalisation may be considered a serious adverse event/experience when, based  
7 upon appropriate medical judgment, they may jeopardise the subject and may require  
8 medical or surgical intervention to prevent one of the outcomes listed in this definition.  
9

10  
11 It is not anticipated that there will be many SAEs related to the behaviour change  
12 intervention. We will report any SAEs which are deemed related to the trial intervention  
13 and unexpected to the Sponsor within the specified timeframes below (12.3.4).  
14  
15

### 16 **12.3.2 Adverse events we require reporting:**

17 We do require that sites report any new diagnosis of depression which requires treatment  
18 with medication or psychological therapy e.g. Cognitive Behavioural Therapy (CBT).  
19  
20  
21

### 22 **12.3.3 Expected SAEs and adverse events**

23 Certain adverse events are common to CF and associated medications. Expected SAEs  
24 must be reported in the annual safety report. Hospitalisation as a result of an exacerbation  
25 will be recorded in the study database and not be reported as an SAE.  
26  
27

28 Expected AEs in relation to medications or common in patients with CF

- 29 1. Acute FEV1 drop >15% after 1<sup>st</sup> dose of medication
- 30 2. Increased productive cough
- 31 3. Nasal congestion or stuffy nose
- 32 4. Chest congestion
- 33 5. Wheezing
- 34 6. Chest pain or chest discomfort
- 35 7. Voice alteration/change
- 36 8. Dyspnea (breathlessness)
- 37 9. Haemoptysis (coughing blood)
- 38 10. Rhinitis
- 39 11.
- 40 12. Headache
- 41 13. Crackles in lung
- 42 14. Throat irritation/ sore throat
- 43 15. URTI
- 44 16. Sinusitis
- 45 17. Deafness
- 46
- 47 18. Indigestion / reflux
- 48 19. Tonsillitis
- 49 20. Joint pain
- 50 21. Decreased appetite
- 51 22. Fatigue
- 52 23. Headache
- 53
- 54
- 55
- 56
- 57
- 58
- 59
- 60



24. Distal intestinal obstructive syndrome
25. Fever
26. Otitis media or ear infection
27. Conjunctivitis
28. Pneumothorax
29. Decreased exercise tolerance
30. Pyrexia
31. Abdominal pain
32. Influenza
33. Pseudomonas infection
34. Vomiting
35. Diabetes
36. Pneumonia

### 12.3.4 Reporting

Adverse events and SAEs can be reported for participants at any stage of their trial participation. A member of the site study team (interventionist, clinician or other) will enquire about any adverse events at routine clinic appointments. These will be recorded on the adverse event section of the paper CRF and database. The event will be assessed by the local Principal Investigator and the form will be kept in the site file. Serious adverse events will be reported in the periodic safety reports to the research ethics committee and Trial Steering committee.

All adverse events (serious or other based on the definitions above) will be recorded on the case report form and details will be **entered on the study database within 1 week of completing the paper form**. Any SAEs which are deemed related to the trial intervention, the site will complete the paper CRF and **fax details this form to the CTRU within 24 hours of becoming aware of the event** in order for the CTRU to report this event to the Sponsor and the main REC within the required timeframes (15 days).

In participants using the Bi-Neb, any Adverse or SAEs relating to the use of Promixin via this device will be reported to the Patient Support team (PSP) at Phillips as per their standard practice.

### 12.4 Auditing

The sponsor will permit monitoring and audits by the relevant authorities, including the Research Ethics Committee. The investigator will also allow monitoring and audits by these bodies and the sponsor, and they will provide direct access to source data and documents.

### 12.5 Finance and indemnity

The trial has been financed by the NIHR and details have been drawn up in a separate agreement. This is an NHS sponsored study. If there is negligent harm during the clinical

1  
2  
3 trial when the NHS body owes a duty of care to the person harmed, NHS Indemnity will  
4 cover NHS staff, medical academic staff with honorary contracts and those conducting the  
5 trial. NHS Indemnity does not offer no-fault compensation and is unable to agree in  
6 advance to pay compensation for non-negligent harm. Ex-gratia payments may be  
7 considered in the case of a claim.  
8  
9

## 10 11 **13. Ethics and dissemination** 12

### 13 **13.1 Approvals**

14  
15 The trial will be conducted subject to Research Ethics Committee favourable opinion  
16 including any provisions for site specific assessment. The application will be submitted  
17 through the IRAS central allocation system. The approval letter from the ethics committee  
18 and copy of approved patient information leaflets, consent forms and any ethically  
19 approved questionnaires will be present in the site files before initiation of the study and  
20 patient recruitment. Local research governance approvals will be sought from all  
21 participating research sites. This clinical trial will be conducted in accordance with Good  
22 Clinical Practice Guidelines and CTRU standard operating procedures. MHRA approval is  
23 not required for this study.  
24  
25

### 26 27 **13.2 Protocol amendments** 28

29 The investigator will be updated following an amendment to the protocol or study  
30 documents. The new documents, REC approval, R&D approval, HRA assessment letter  
31 and any other appropriate documentation surrounding the amendment will be sent to the  
32 site via a “site file update”. The sites will receive the documents with a site file update  
33 sheet, detailing where to file the amended documents and which documents to supersede.  
34 If there are any significant changes to the study procedures or eligibility criteria sites will  
35 be notified by a combination of email, telephone, newsletters or additional project training  
36 when required.  
37  
38

39 In relation to informing REC, if any study documents require amending, the changes will  
40 be discussed with the sponsor and either a substantial (via IRAS and HRA) or minor  
41 amendment (notification via email) will be submitted to REC and HRA. Following REC  
42 acknowledgment and approval (when applicable) other appropriate approvals will be  
43 obtained i.e. HRA and R&D approval.  
44  
45

46 If a protocol amendment requires participants to be re-consented they will be informed of  
47 the amendment by an updated participant information sheet and will be asked to re-consent  
48 to the study. Trial registries, journals and regulators will be updated regarding protocol  
49 amendments when appropriate.  
50  
51

### 52 53 **13.3 Consent**

54 *Consent for the main trial:*

55 The ACTiF trial interventionist or local PI at the site will be responsible for taking informed  
56 consent from potentially eligible trial participants face to face at home or in clinic. Any  
57 researcher or clinical member of the team taking informed consent will be trained in study  
58 procedures and GCP. Participants will have the option to specify whether they are  
59  
60

1  
2  
3 interested in being approached for the qualitative interviews and audio recordings.  
4 However, they do not have to consent to these to be involved in the main study.  
5

#### 6 *Consent for the interviews:*

7  
8 Consent for interviews (participant, interventionist or MDT member) will separately be  
9 taken by the qualitative researcher. Participants can participate in the main trial but choose  
10 to not take part in the qualitative research.  
11

### 12 **13.4 Confidentiality**

13  
14 Participant confidentiality will be respected at all times. Participant names and contact  
15 details will be collected and entered on the prospect database. Access to these personal  
16 details will be restricted to users with appropriate privileges only. All users who do not  
17 require access to identifiable data will only identify data by participant ID number, and no  
18 patient identifiable data will be transferred from the database to the statistician.  
19

20  
21 Trial documents (paper and electronic) will be retained in a secure location during and  
22 after the trial has finished. All source documents will be retained for a period of 5 years  
23 following the end of the trial. Where trial related information is documented in the  
24 medical records – those records will be retained for 5 years after the last patient last visit.  
25 Each site is responsible for ensuring records are archived and the information supplied to  
26 the Chief Investigator.  
27

28  
29 Any participant data held within CFHealthHub will be stored on a secure server at the  
30 University of Manchester. CFHealthHub complies with the Data Protection Act and  
31 follows best practice guidelines on security and information governance. Encrypted  
32 channels are used to transfer any data to and from the web and mobile application  
33 platforms. All user interaction with the CFHealthHub server and each action performed by  
34 a user will be logged. An audit log contains the username of the user performing the action,  
35 the date & time of the action, short description of the action performed. All users are  
36 authenticated via a secure password a with access to the system restricted on a role basis.  
37  
38

### 39 **13.5 Declaration of Interests**

40  
41 Martin Wildman has received funding from Zambon who market the Ineb to carry out  
42 research to understand the performance of the Ineb and in the past we received funding  
43 from Zambon to carry out work to understand barriers to adherence.  
44  
45

### 46 **13.6 Access to data**

47  
48 The central ACTiF study team alone will have access to the final dataset details of which  
49 will be outlined in the study DMP.  
50

### 51 **13.7 Ancillary and post-trial care**

52  
53 Centres will be able to continue to use CFHealthHub if they wish to do so after the end of  
54 the pilot and feasibility study. If so, participants in the control arm will be able to cross  
55 over to use the intervention at this stage.  
56  
57

### 58 **13.8 Dissemination policy**

59  
60 As this is a feasibility study its main interest will be to potential researchers and funding  
bodies. Data will be reported according to the revised CONSORT statement (Schultz,

1  
2  
3 2010). The findings of this research will be available to NIHR, patient groups and other  
4 interested bodies. It will also be offered for presentation at medical meetings and will be  
5 offered for publication in peer reviewed medical journals.  
6  
7  
8  
9  
10  
11  
12  
13  
14  
15  
16  
17  
18  
19  
20  
21  
22  
23  
24  
25  
26  
27  
28  
29  
30  
31  
32  
33  
34  
35  
36  
37  
38  
39  
40  
41  
42  
43  
44  
45  
46  
47  
48  
49  
50  
51  
52  
53  
54  
55  
56  
57  
58  
59  
60

## References

1. Alexander BM, Petren EK, Grimes M, Fink A, Myers V, Sewall A: **Mission of the cystic fibrosis foundation Annual Data Report 2013 Cystic Fibrosis Foundation Patient Registry**. 2014.
2. Southern KW, Barker PM, Solis-Moya A, Patel L: **Macrolide antibiotics for cystic fibrosis**. In *Cochrane Database of Systematic Reviews*. Edited by Southern KW. Chichester, UK: John Wiley & Sons, Ltd; 2011.
3. Ramsey BW, Davies J, McElvaney NG, Tullis E, Bell SC, Dřevínek P, Griese M, McKone EF, Wainwright CE, Konstan MW, Moss R, Ratjen F, Sermet-Gaudelus I, Rowe SM, Dong Q, Rodriguez S, Yen K, Ordoñez C, Elborn JS: **A CFTR Potentiator in Patients with Cystic Fibrosis and the G551D Mutation**. *N Engl J Med* 2011, **365**:1663–1672.
4. McCoy KS, Quittner AL, Oermann CM, Gibson RL, Retsch-Bogart GZ, Montgomery AB: **Inhaled aztreonam lysine for chronic airway Pseudomonas aeruginosa in cystic fibrosis**. *Am J Respir Crit Care Med* 2008, **178**:921–8.
5. Ryan G, Mukhopadhyay S, Singh M: **Nebulised anti-pseudomonal antibiotics for cystic fibrosis**. In *Cochrane Database of Systematic Reviews*. Edited by Ryan G. Chichester, UK: John Wiley & Sons, Ltd; 2003.
6. Jones AP, Wallis C: **Dornase alfa for cystic fibrosis**. In *Cochrane Database of Systematic Reviews*. Edited by Jones AP. Chichester, UK: John Wiley & Sons, Ltd; 2010.
7. Wark P, McDonald VM: **Nebulised hypertonic saline for cystic fibrosis**. In *Cochrane Database of Systematic Reviews*. Edited by Wark P. Chichester, UK: John Wiley & Sons, Ltd; 2009.
8. Ryan G, Singh M, Dwan K: **Inhaled antibiotics for long-term therapy in cystic fibrosis**. In *Cochrane Database of Systematic Reviews*. Edited by Ryan G. Chichester, UK: John Wiley & Sons, Ltd; 2011.
9. Eakin MN, Bilderback A, Boyle MP, Mogayzel PJ, Riekert KA: **Longitudinal association between medication adherence and lung health in people with cystic fibrosis**. *J Cyst Fibros* 2011, **10**:258.
10. Briesacher BA, Quittner AL, Saiman L, Sacco P, Fouayzi H, Quittell LM, Accurso F, Modi A, Lim C, Yu N, Geller D, Wagner M, Quittner A, DiMatteo M, Quittner A, Barker D, Marciel K, Grimley M, Emerson J, Rosenfeld M, McNamara S, Ramsey B, Gibson R, Nixon G, Armstrong D, Carzino R, Carlin J, Olinsky A, Robertson C, Grimwood K, et al.: **Adherence with tobramycin inhaled solution and health care utilization**. *BMC Pulm Med* 2011, **11**:5.
11. AL Q, KA R, Zhang J: **Relationship between adherence to pulmonary medications and health care costs: longitudinal analyses from 2005-2011**. *Pediatr Pulmonol* 2012, **47**:198.
12. Smyth A, Lewis S, Bertenshaw C, Choonara I, McGaw J, Watson A: **Case-control study of acute renal failure in patients with cystic fibrosis in the UK**. *Thorax* 2008, **63**:532–5.

- 1  
2  
3 13. McManus P: *Lead Pharmacist - Specialised Services (South Yorkshire and Bassetlaw)*  
4 *NHS England*. .  
5
- 6 14. Daniels T, Goodacre L, Sutton C, Pollard K, Conway S, Peckham D: **Accurate**  
7 **assessment of adherence: self-report and clinician report vs electronic monitoring of**  
8 **nebulizers**. *Chest* 2011, **140**:425–32.  
9
- 10 15. McNeil S: *Personal Communication from Stephanie McNeil, Chief Statistician of UK CF*  
11 *Registry*. .  
12
- 13 16. Horne RW, Barber N, Elliot R, Morgan M: *Concordance, Adherence and Compliance in*  
14 *Medicine Taking: A Conceptual Map and Research Priorities. National Co-ordinating*  
15 *Centre for NHS Service Delivery and Organisational R&D (NCCSDO)*. 2005.  
16  
17
- 18 17. Craig P, Dieppe P, Macintyre S, Michie S, Nazareth I, Petticrew M: **Developing and**  
19 **evaluating complex interventions: the new Medical Research Council guidance**. *BMJ*  
20 2008:a1655–a1655.  
21
- 22 18. Michie S, van Stralen MM, West R: **The behaviour change wheel: a new method for**  
23 **characterising and designing behaviour change interventions**. *Implement Sci* 2011, **6**:42.  
24
- 25 19. Parham R, Thomas S, Mills R, Al. E: **CF patient’s beliefs about nebuliser treatment:**  
26 **implications for adherence to treatment**. *J Cyst Fibros* 2012, **11**(Suppl 1):S9.  
27
- 28 20. Bucks RS, Hawkins K, Skinner TC, Horn S, Seddon P, Horne R: **Adherence to**  
29 **treatment in adolescents with cystic fibrosis: the role of illness perceptions and**  
30 **treatment beliefs**. *J Pediatr Psychol* 2009, **34**:893–902.  
31
- 32 21. George M, Rand-Giovannetti D, Eakin MN, Borrelli B, Zettler M, Riekert KA:  
33 **Perceptions of barriers and facilitators: self-management decisions by older adolescents**  
34 **and adults with CF**. *J Cyst Fibros* 2010, **9**:425–32.  
35  
36
- 37 22. Dziuban EJ, Saab-Abazeed L, Chaudhry SR, Streetman DS, Nasr SZ: **Identifying**  
38 **barriers to treatment adherence and related attitudinal patterns in adolescents with**  
39 **cystic fibrosis**. *Pediatr Pulmonol* 2010, **45**:450–8.  
40
- 41 23. Bregnballe V, Schiøtz PO, Boisen KA, Pressler T, Thastum M: **Barriers to adherence in**  
42 **adolescents and young adults with cystic fibrosis: a questionnaire study in young**  
43 **patients and their parents**. *Patient Prefer Adherence* 2011, **5**:507–15.  
44
- 45 24. Modi AC, Quittner AL: **Barriers to treatment adherence for children with cystic**  
46 **fibrosis and asthma: What gets in the way?** *J Pediatr Psychol* 2006, **31**:846–858.  
47
- 48 25. Abbott J, Dodd M, Bilton D, Webb AK: **Treatment compliance in adults with cystic**  
49 **fibrosis**. *Thorax* 1994, **49**:115–20.  
50
- 51 26. Abbott J, Dodd M, Webb AK: **Health perceptions and treatment adherence in adults**  
52 **with cystic fibrosis**. *Thorax* 1996, **51**:1233–8.  
53
- 54 27. Abbott J, Dodd M, Gee L, Webb K: **Ways of coping with cystic fibrosis: implications**  
55 **for treatment adherence**. *Disabil Rehabil* 2001, **23**:315–24.  
56  
57
- 58 28. Conway SP, Pond MN, Hamnett T, Watson A: **Compliance with treatment in adult**  
59 **patients with cystic fibrosis**. *Thorax* 1996, **51**:29–33.  
60

- 1  
2  
3 29. Jones S, Curley R, Wildman M: **345 Systematic review of qualitative studies**  
4 **investigating barriers to adherence in patients with cystic fibrosis using framework**  
5 **analysis structured by a conceptual framework of behaviour change.** *J Cyst Fibros* 2013,  
6 **12**(Suppl 1):S136.  
7  
8  
9 30. Kettler LJ, Sawyer SM, Winefield HR, Greville HW: **Determinants of adherence in**  
10 **adults with cystic fibrosis.** *Thorax* 2002, **57**:459–64.  
11  
12 31. Lask B: **Non-Adherence to Treatment in Cystic Fibrosis.** *J R Soc Med* 1994, **87**(21  
13 Suppl):25–27.  
14  
15 32. Latchford G, Duff A, Quinn J, Conway S, Conner M: **Adherence to nebulised**  
16 **antibiotics in cystic fibrosis.** *Patient Educ Couns* 2009, **75**:141–4.  
17  
18 33. Horne R, Weinman J, Barber N, Elliott R: *Concordance , Adherence and Compliance in*  
19 *Medicine Taking: Report for the National Co-Ordinating Centre for NHS Service Delivery*  
20 *and Organisation R & D (NCCSDO).* London: NCCSDO; 2005.  
21  
22 34. Ivers N, Jamtvedt G, Flottorp S, Young JM, Odgaard-Jensen J, French SD, O'Brien MA,  
23 Johansen M, Grimshaw J, Oxman AD: **Audit and feedback: effects on professional**  
24 **practice and healthcare outcomes.** *Cochrane database Syst Rev* 2012, **6**:CD000259.  
25  
26 35. Geraedts H, Zijlstra A, Bulstra SK, Stevens M, Zijlstra W: **Effects of remote feedback in**  
27 **home-based physical activity interventions for older adults: a systematic review.** *Patient*  
28 *Educ Couns* 2013, **91**:14–24.  
29  
30 36. Cane J, O'Connor D, Michie S: **Validation of the theoretical domains framework for**  
31 **use in behaviour change and implementation research.** *Implement Sci* 2012, **7**:37.  
32  
33 37. Thabane L, Ma J, Chu R, Cheng J, Ismaila A, Rios LP, Robson R, Thabane M,  
34 Giangregorio L, Goldsmith CH: **A tutorial on pilot studies: the what, why and how.** *BMC*  
35 *Med Res Methodol* 2010, **10**:1.  
36  
37 38. Baranowski T, Stables G: **Process Evaluations of the 5-a-Day Projects.** *Heal Educ*  
38 *Behav* 2000, **27**:157–166.  
39  
40 39. Padenhauer LM, Mozygemba K, Gerhardus A, Hofmann B, Booth A, Lysdahl KB,  
41 Tummers M, Burns J, Rehfuss EA: **Context and implementation: A concept analysis**  
42 **towards conceptual maturity.** *Z Evid Fortbild Qual Gesundheitsw* 2015, **109**:103–114.  
43  
44 40. Weber K, Glynn M a.: **Making Sense with Institutions: Context, Thought and Action**  
45 **in Karl Weick's Theory.** *Organ Stud* 2006, **27**:1639–1660.  
46  
47 41. Hyatt D: **Time for a change: a critical discursial analysis of synchronic context with**  
48 **diachronic relevance.** *Discourse Soc* 2005, **16**:515–534.  
49  
50 42. Linnan L, Steckler A: **Process evaluation for public health interventions and research:**  
51 **an overview.** In *Process evaluation for public health interventions and research.* 1st edition.  
52 Edited by Linnan L, Steckler A. San Francisco: Jossey-Bass; 2002:1–23.  
53  
54 43. Moore GF, Audrey S, Barker M, Bond L, Bonell C, Hardeman W, Moore L, O'Cathain A,  
55 Tinati T, Wight D, Baird J: **Process evaluation of complex interventions: Medical**  
56 **Research Council guidance.** *BMJ* 2015, **350**:h1258.  
57  
58  
59  
60

- 1  
2  
3 44. Nilsen P: **Making sense of implementation theories, models and frameworks.**  
4 *Implement Sci* 2015, **10**:1–13.  
5
- 6 45. Meyers DC, Durlak J a., Wandersman A: **The Quality Implementation Framework: A**  
7 **Synthesis of Critical Steps in the Implementation Process.** *Am J Community Psychol* 2012,  
8 **50**:462–480.  
9
- 10 46. Borrelli B: **The Assessment, Monitoring, and Enhancement of Treatment Fidelity In**  
11 **Public Health Clinical Trials.** *J Public Health Dent* 2011, **71**:S52–S63.  
12
- 13 47. Fuchs HJ, Borowitz DS, Christiansen DH, Morris EM, Nash ML, Ramsey BW,  
14 Rosenstein BJ, Smith AL, Wohl ME: **Effect of aerosolized recombinant human DNase on**  
15 **exacerbations of respiratory symptoms and on pulmonary function in patients with**  
16 **cystic fibrosis. The Pulmozyme Study Group.** *N Engl J Med* 1994, **331**:637–42.  
17  
18
- 19 48. Ratjen F, Durham T, Navratil T, Schaberg A, Accurso FJ, Wainwright C, Barnes M, Moss  
20 **RB: Long term effects of denufosal tetrasodium in patients with cystic fibrosis.** *J Cyst*  
21 *Fibros* 2012, **11**:539–49.  
22
- 23 49. Miller MR, Hankinson J, Brusasco V, Burgos F, Casaburi R, Coates A, Crapo R, Enright  
24 P, van der Grinten CPM, Gustafsson P, Jensen R, Johnson DC, MacIntyre N, McKay R,  
25 Navajas D, Pedersen OF, Pellegrino R, Viegi G, Wanger J: **Standardisation of spirometry.**  
26 *Eur Respir J* 2005, **26**:319–38.  
27  
28
- 29 50. Herdman M, Gudex C, Lloyd A, Janssen M, Kind P, Parkin D, Bonnel G, Badia X:  
30 **Development and preliminary testing of the new five-level version of EQ-5D (EQ-5D-**  
31 **5L).** *Qual Life Res* 2011, **20**:1727–36.  
32
- 33 51. Hibbard JH, Mahoney ER, Stockard J, Tusler M: **Development and testing of a short**  
34 **form of the patient activation measure.** *Health Serv Res* 2005, **40**(6 Pt 1):1918–30.  
35
- 36 52. Wong MD, Sarkisian C a., Davis C, Kinsler J, Cunningham WE: **The Association**  
37 **Between Life Chaos, Health Care Use, and Health Status Among HIV-Infected Persons.**  
38 *J Gen Intern Med* 2007, **22**:1286–1291.  
39
- 40 53. Verplanken B, Orbell S: **Reflections on Past Behavior: A Self-Report Index of Habit**  
41 **Strength1.** *J Appl Soc Psychol* 2003, **33**:1313–1330.  
42
- 43 54. Quittner a L, Sweeny S, Watrous M, Munzenberger P, Bearss K, Gibson Nitza a, Fisher  
44 L a, Henry B: **Translation and linguistic validation of a disease-specific quality of life**  
45 **measure for cystic fibrosis.** *J Pediatr Psychol* 2000, **25**:403–14.  
46  
47
- 48 55. Kroenke K, Strine TW, Spitzer RL, Williams JBW, Berry JT, Mokdad AH: **The PHQ-8**  
49 **as a measure of current depression in the general population.** *J Affect Disord* 2009,  
50 **114**:163–173.  
51
- 52 56. Spitzer RL, Kroenke K, Williams JBW, Löwe B: **A brief measure for assessing**  
53 **generalized anxiety disorder: the GAD-7.** *Arch Intern Med* 2006, **166**:1092–7.  
54
- 55 57. Horne R, Weinman J, Hankins M: **The beliefs about medicines questionnaire: The**  
56 **development and evaluation of a new method for assessing the cognitive representation**  
57 **of medication.** *Psychol Health* 1999, **14**:1–24.  
58
- 59 58. Lancaster GA, Dodd S, Williamson PR: **Design and analysis of pilot studies:**  
60



1  
2  
3 **recommendations for good practice.** *J Eval Clin Pract* 2004, **10**:307–12.  
4

5 59. Arain M, Campbell MJ, Cooper CL, Lancaster GA: **What is a pilot or feasibility study?**  
6 **A review of current practice and editorial policy.** *BMC Med Res Methodol* 2010, **10**:67.  
7

8 60. Eldridge S, Bond C, Campbell M, Lancaster G, Thabane L, Hopwell S: **Definition and**  
9 **reporting of pilot and feasibility studies.** *Trials* 2013, **14**(Suppl 1):O18.  
10

11 61. Schulz KF, Altman DG, Moher D: **CONSORT 2010 statement: Updated guidelines for**  
12 **reporting parallel group randomized trials.** *Annu Intern Med* 2010, **152**:726–732.  
13

14 62. Ritchie J, Spencer L: **Qualitative data analysis for applied policy research.** In  
15 *Analysing qualitative data.* Edited by Bryman A, Burgess RG. Routledge; 1994:173–194.  
16

17 63. Horne R: **Treatment perceptions and self-regulation.** In *The Self-regulation of Health*  
18 *and Illness Behaviour.* Edited by Cameron L, Leventhal H. London: Routledge; 2003:138–53.  
19

20 64. Moore GF, Audrey S, Barker M, Bond L, Bonell C, Hardeman W, Moore L, O’Cathain A,  
21 Tinati T, Wight D, Baird J: **Process evaluation of complex interventions: Medical**  
22 **Research Council guidance.** *BMJ* 2015, **350**(mar19 6):h1258–h1258.  
23

24 65. Farmer T, Robinson K, Elliott SJ, Eyles J: **Developing and implementing a**  
25 **triangulation protocol for qualitative health research.** *Qual Health Res* 2006, **16**:377–94.  
26

27 66. O’Cathain A, Murphy E, Nicholl J, Cathain AO: **Three techniques for integrating data**  
28 **in mixed methods studies.** *BMJ* 2010, **341**(sep17 1):c4587–c4587.  
29  
30  
31  
32  
33  
34  
35  
36  
37  
38  
39  
40  
41  
42  
43  
44  
45  
46  
47  
48  
49  
50  
51  
52  
53  
54  
55  
56  
57  
58  
59  
60

## Appendix 1. W.H.O. Trial Registration Data Set

| DATA CATEGORY                                 | INFORMATION                                                                                                                                                                                                                                           |
|-----------------------------------------------|-------------------------------------------------------------------------------------------------------------------------------------------------------------------------------------------------------------------------------------------------------|
| Primary registry and trial identifying number | To be added                                                                                                                                                                                                                                           |
| Date of registration in primary registry      | To be added                                                                                                                                                                                                                                           |
| Secondary identifying numbers                 | NIHR: RP-PG-1212-20015<br>Sponsor (STH): STH19213                                                                                                                                                                                                     |
| Source(s) of monetary or material support     | National Institute for Health Research (NIHR) Programme Grants for Applied Research programme.                                                                                                                                                        |
| Primary sponsor                               | Sheffield Teaching Hospitals NHS Foundation Trust.                                                                                                                                                                                                    |
| Secondary sponsor(s)                          | none                                                                                                                                                                                                                                                  |
| Contact for public queries                    | Chin Maguire<br>Trial Manager<br>Clinical Trials Research Unit<br>University of Sheffield<br>Regent Court<br>30 Regent Street<br>Sheffield<br>S1 4DA<br>Tel: (+44) (0)114 222 0717<br>Fax: (+44) (0)114 222 0870<br>email : c.maguire@sheffield.ac.uk |
| Contact for scientific queries                | Dr Martin Wildman<br>Adult CF Centre<br>Northern General Hospital<br>Herries Road<br>Sheffield<br>S5 7AU<br>Tel: (0114) 2715212<br>Fax: (0114) 222 0870<br>email : <a href="mailto:Martin.Wildman@sth.nhs.uk">Martin.Wildman@sth.nhs.uk</a>           |
| Public title                                  | <u>Adherence to treatment in adults with Cystic Fibrosis (ACtiF)</u>                                                                                                                                                                                  |
| Scientific title                              | Development and evaluation of an intervention to support Adherence to treatment in adults with Cystic Fibrosis : a feasibility study comprised of an external pilot randomised controlled trial and process evaluation                                |
| Countries of recruitment                      | United Kingdom                                                                                                                                                                                                                                        |
| Health condition(s) or problem(s) studied     | Cystic Fibrosis                                                                                                                                                                                                                                       |
| Intervention(s)                               | Usual care plus a microchipped nebuliser with or without a complex intervention. The complex intervention consists of:                                                                                                                                |

|                                      |                                                                                                                                                                                                                                                                                                                                                                                                                                                                                                                                                                                                                                                                                                              |
|--------------------------------------|--------------------------------------------------------------------------------------------------------------------------------------------------------------------------------------------------------------------------------------------------------------------------------------------------------------------------------------------------------------------------------------------------------------------------------------------------------------------------------------------------------------------------------------------------------------------------------------------------------------------------------------------------------------------------------------------------------------|
|                                      | <ul style="list-style-type: none"> <li>- A software platform, CFHealthHub mobile apps and website, which allows access to medication adherence data and education modules intended to remove barriers to adherence</li> <li>- A manual containing a 'behaviour change toolkit' to guide interactions between health</li> </ul>                                                                                                                                                                                                                                                                                                                                                                               |
| Key inclusion and exclusion criteria | <p>Inclusion criteria for participants</p> <ol style="list-style-type: none"> <li>1. Diagnosed with CF and with data within the CF registry</li> <li>2. Aged 16 years and above</li> <li>3. Taking inhaled mucolytics or antibiotics via a chipped nebuliser (e.g. eTrack or Bi-Neb) or able and willing to take via eTrack or Bi-Neb.</li> </ol> <p>Exclusion criteria for participants</p> <ol style="list-style-type: none"> <li>1. Post-lung transplant</li> <li>2. People on the active lung transplant list</li> <li>3. Patients receiving palliative care,</li> <li>4. Lacking in capacity to give informed consent</li> <li>5. Using dry powder devices to take antibiotics or mucolytics</li> </ol> |
| Study type                           | Feasibility study comprised of an external pilot randomised controlled trial and process evaluation                                                                                                                                                                                                                                                                                                                                                                                                                                                                                                                                                                                                          |
| Date of first enrolment              | Anticipated: 02/05/2016                                                                                                                                                                                                                                                                                                                                                                                                                                                                                                                                                                                                                                                                                      |
| Target sample size                   | We propose to recruit to time, that is for a fixed period of four months rather than to a fixed sample size. To match the proposed recruitment rate of the main RCT, the target sample over the four months for which the pilot RCT is open, will be n=64.                                                                                                                                                                                                                                                                                                                                                                                                                                                   |
| Recruitment status                   | Not yet open.                                                                                                                                                                                                                                                                                                                                                                                                                                                                                                                                                                                                                                                                                                |
| Primary outcome(s)                   | Exacerbations of cystic fibrosis as defined by the Fuchs criteria ( <i>N Engl J Med</i> 1994, 331:637–42.)                                                                                                                                                                                                                                                                                                                                                                                                                                                                                                                                                                                                   |
| Key secondary outcomes               | None.                                                                                                                                                                                                                                                                                                                                                                                                                                                                                                                                                                                                                                                                                                        |

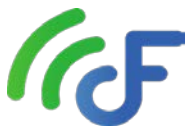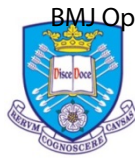

**ACtiF Pilot Study**

**Control Patient Topic guide**

*Thank you for agreeing to take part in the interview today*

*Check timing ok*

*Check consent form filled in / received*

*Are you happy for the interview to be recorded?*

*We're interested in your experiences of the service that you receive for helping you to use your nebuliser.*

1. Why did you decide to take part in the research?
2. How did you find being asked to take part in the trial? [Prompts: paperwork volume, information provided, questionnaires]

**Now I'd like to ask you about the care you received before the trial started to help you use your nebuliser.**

3. What types of things did the unit/hospital recommend that you do to help you use your nebuliser? [Prompts: appointments / what do you talk about? / nebulisers / skills to use your nebuliser properly / knowledge and beliefs?]
4. What types of things did the unit/hospital recommend that you do to help you use your nebuliser as much as possible? [Prompts: setting goals, solving problems, making plans, giving you information, building skills, beliefs about nebuliser medication, giving you confidence]
5. How did the care you received to help you use your nebuliser fit with any other care you received for CF more generally?

- 1  
2  
3 6. How could the care you received for helping you to use your nebuliser as prescribed be  
4 improved?  
5  
6  
7  
8  
9 7. Overall how happy are you with the care you received for your nebuliser? [Prompts: what  
10 could be done better?]  
11  
12  
13

14 **Now I want to ask you about specific kinds of things that might have changed since the trial**  
15 **started:**  
16

- 17  
18  
19  
20 8. Since you joined the trial has the care that you receive in the unit / hospital changed at all?  
21 [Prompts: Has anybody done anything different? What have they done?]  
22  
23  
24  
25 9. Since you joined the trial has anyone asked you to change how you use your nebuliser? If so,  
26 what have they suggested you do? [Prompt: capability skills / knowledge including beliefs /  
27 where has the change come from?]  
28  
29  
30  
31  
32 10. Since you joined the trial has anyone suggested ways to help you use your nebuliser as much  
33 as possible? If so what? [Prompt: opportunity finding time to use nebuliser / making plans /  
34 setting goals / where has the change come from?]  
35  
36  
37  
38  
39 11. Since you joined the trial has anyone helped you have more confidence to use your  
40 nebuliser as prescribed? [Prompt: where has the change come from? what have they done?]  
41  
42  
43  
44  
45

46 **Is there anything else that we haven't talked about that you'd like to comment on?**  
47  
48  
49  
50  
51

52  
53 **THANK YOU**  
54  
55  
56

57 *The ACTiF Project is funded by the National Institute for Health Research's Programme Grants for*  
58 *Applied Research.*  
59  
60

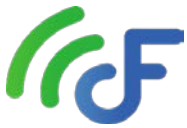

**ACTiF Pilot Study**

**Intervention Patient Topic guide**

*Thank you for agreeing to take part in the interview today*

*Check timing ok*

*Check consent form filled in / received*

*Are you happy for the interview to be recorded?*

*We're interested in your experiences of the service that you have received from CFHealthHub including both the meetings to discuss your nebuliser medication and the website/app you have used.*

1. Why did you decide to take part in the research?
2. How did you find being asked to take part in the trial? [Prompts: recruitment, paperwork volume, information provided, questionnaires]

**Now I'd like to ask you about your meetings with the person who has been working with you on CFHealthHub.**

3. What types of things did they recommend that you do? [prompts: setting goals, solving problems, making plans (myplan), giving you information]
4. Do you think you have had any benefit from these meetings?  
**If yes**, what benefit and what about the service helped you to get this?  
**If no**, what has stopped you gaining benefit?
5. What was good about how the meetings were delivered? [Prompt: what needs to be improved?]

1  
2  
3 **Now I'd like to talk to you about the CFHealthHub website / app.**  
4

- 5 6. What was good about the website? [Prompts: my plan, how am I doing, tool kit, graphs, my  
6 treatment]  
7  
8  
9
- 10 7. What needs to be improved? [Prompts: my plan, how am I doing, tool kit, graphs, my  
11 treatment]  
12  
13  
14  
15
- 16 8. Do you think you've had any benefit from using the website?  
17  
18 **If yes**, what benefit and what about the website helped you to get this?  
19  
20 **If no**, what has stopped you gaining benefit?  
21  
22  
23  
24
- 25 9. Have the website and/or meetings helped you to improve how often you use your  
26 nebuliser?  
27  
28 **If yes**, how has it helped you to do this?  
29  
30 **If not**, why not?  
31  
32  
33  
34
- 35 10. How do the CFHealthHub website and the meetings work together?  
36  
37  
38  
39
- 40 11. Has using CFHealthHub helped you to be able to use your nebuliser any better? Why / Why  
41 not? [Prompt: capability skills / knowledge including beliefs]  
42  
43  
44
- 45 12. Has using CFHealthHub helped you to find the time to use your nebuliser more? Why / why  
46 not? [Prompt: opportunity / making plans]  
47  
48  
49
- 50 13. Has using CFHealthHub made you want to use your nebuliser more? Why / why not?  
51 [Prompt: motivation and confidence]  
52  
53  
54
- 55 14. How does the CFHealthHub service (website and meetings) fit with the care you were  
56 already receiving at the unit/hospital?  
57  
58  
59  
60

1  
2  
3 15. Do you think you would continue using CFHealthHub? [Prompt: during the study / after the  
4 study]  
5  
6

7  
8  
9 16. Is CFHealthHub a good thing to use in general for people with CF? Why? / Why not?  
10

11  
12  
13 17. How have you found being part of the study?  
14  
15

16  
17 Is there anything else that we haven't talked about that you'd like to comment on?  
18  
19

20  
21 **THANK YOU**  
22  
23  
24  
25  
26  
27  
28  
29  
30  
31  
32  
33  
34  
35  
36  
37  
38  
39  
40  
41  
42  
43  
44  
45  
46  
47  
48  
49  
50  
51  
52  
53  
54  
55

56 *The ACTiF Project is funded by the National Institute for Health Research's Programme Grants for*  
57 *Applied Research.*  
58  
59  
60



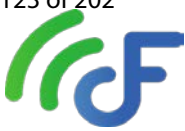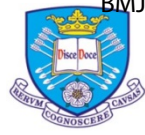

**ACTIF Pilot Study**

**Interventionist Topic guide**

Thank you for agreeing to take part in the interview today.

Check timing ok

Check consent form filled in / received

Are you happy for the interview to be recorded?

Introduction to the interview: Interested in how you've found using CFHealthhub (CFHH) with your participants and any learning from it

**The trial**

1. What works or could be improved about:
  - a) recruiting patients to the trial?
  - b) collecting data?
  - c) any other aspect?

**The intervention:**

**Now I'd like to go through each of the steps for providing the intervention to get your views on each of these**

2. What works or could be improved about:
  - a) how you have assessed participants' adherence levels prior to using CFHH?
  - b) how you set up appointments with your participants?
  - c) session 1? [Prompts: gathering data, introducing the nebuliser, entering prescription data into CFHH, completion of screening tools, patient feedback, anything else]

1  
2  
3 d) session 2? [Prompts: reviewing adherence data, introducing CFHH, explaining  
4 modules, setting goals, action planning, identifying suitable tailored content, technical  
5 issues, anything else]  
6  
7

8  
9 e) session 3? [Prompts: reviewing goals, reviewing adherence plans, motivation,  
10 problem solving, anything else]  
11  
12

- 13  
14 3. What works or could be improved about the training manuals and training sessions?  
15  
16  
17 4. What works or could be improved about the support available from the research  
18 team? [Prompts: timing, availability, problem solving].  
19 [Specific prompt for MDT senior interventionist: do you think the training has  
20 equipped you to deliver this intervention in your centre yourself after the trial ends? If  
21 no, what further training would be needed?]  
22  
23  
24  
25 5. How has the CFHH intervention been received by the rest of the team? [Prompt: how  
26 has your communication been with the rest of the team about CFHH?]  
27  
28  
29  
30 6. What sort of follow-up did participants request? How will you handle this?  
31  
32  
33  
34 7. How has the CFHH intervention helped your participants to know how to use their  
35 nebuliser? [Prompt: capability / skills, knowledge and beliefs]  
36  
37  
38 8. How has the CFHH intervention helped your participants find ways to use their  
39 nebuliser more? [Prompt: opportunity]  
40  
41  
42  
43 9. How has the CFHH intervention helped to motivate your participants to use their  
44 nebuliser? [Prompt: motivation / confidence]  
45  
46  
47  
48  
49

50 **General questions:**  
51

- 52  
53 10. How engaged did participants seem with CFHH? [Prompt: What feedback if any have  
54 you had from participants about CFHH?]  
55  
56  
57  
58 11. How useful do you think CFHH is for your participants?  
59  
60

1  
2  
3 12. How easy / difficult has it been to get your participants to use CFHH?  
4  
5

6 13. Have you seen any changes to the ways in which your participants use their  
7 nebulisers since starting CFHH?  
8  
9

10  
11 14. What have you learnt from using CFHH with your participants?  
12  
13

14 15. What if any are the benefits to you and / or to your participants of using CFHH?  
15  
16

17 16. How do you think CFHH fits with the other care offered by the centre?  
18  
19

20 17. How have you found being part of the trial?  
21  
22

23  
24  
25 Is there anything else you'd like to say about CFHH?  
26  
27  
28  
29

30 **THANK YOU**  
31  
32  
33  
34  
35  
36  
37  
38  
39  
40  
41  
42  
43  
44  
45  
46  
47  
48  
49  
50  
51  
52  
53  
54  
55  
56

57 *The ACTiF Project is funded by the National Institute for Health Research's Programme Grants for*  
58 *Applied Research.*  
59  
60

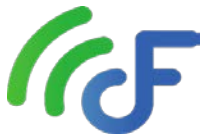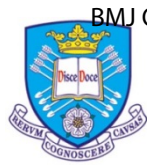

**ACTiF Pilot Study**

**MDT Topic guide**

*Thank you for agreeing to take part in the interview today.*

*Check timing ok*

*Check consent form filled in / received*

*Are you happy for the interview to be recorded?*

*We're interested in your views of the CFHealthHub service and how it fits into the care provided in your centre.*

1. Can you describe the key things you did in your centre to help patients adhere to their nebulisers prior to the ACTiF study?
2. How does nebuliser adherence fit with the other things you do for CF patients?
3. What involvement have you had in the CFHealthHub intervention? [Prompts: website, interventionist, training of staff]
4. You had training to help you be more aware of patient activation. What did you think of the training? [Prompts: Do you think it has changed your practice in any way? If yes what changes, if no why not? Key aspects – patient knowledge including beliefs / skills / confidence]
5. Do you think CFHealthHub is a useful intervention? Why? / Why not? [Prompts: what do you think about the: website, feedback about adherence data, interventionist, training?]
6. How do you think the CFHealthHub intervention is operating in practice? [Prompt: what are the strengths / improvements needed?]
7. How does the CFHealthHub intervention fit with the care offered by your centre?
8. How does the CFHealthHub intervention help your patients to know how to use their nebuliser? [Prompts: Skills / knowledge / beliefs. How / Why doesn't it help?]
9. How does the CFHealthHub intervention help your patients to find ways to use their nebuliser more? [Prompts: How / Why doesn't it help?]

1  
2  
3 10. How does the CFHealthHub intervention help to motivate your patients to use their nebuliser?  
4 [Prompts: How / Why doesn't it help?]  
5  
6

7  
8 11. Do you think CFHealthHub is helping your intervention patients to improve their adherence? If  
9 yes, what key things have helped this? If no, what if anything could be done to help this?  
10

11  
12 12. Has the CFHealthHub intervention changed anything about the way in which you and/or your  
13 team approach adherence in your centre?  
14

15 i) for patients receiving the intervention?  
16

17 ii) for patients not receiving the intervention?  
18

19 [Prompts: MDT discussions / differences between control and intervention patients]  
20  
21

22 13. Which patient groups are most likely to benefit from CFHealthHub? Why?  
23  
24

25 14. Which patient groups are least likely to benefit from CFHealthHub? Why?  
26  
27

28 15. Would you consider continuing to use CFHealthHub in the future? Why? Why not?  
29  
30

31 16. How has it been for you / your centre taking part in the trial? [Prompt: recruitment to the study]  
32  
33

34 17. How able do you feel to go on delivering care related to improving adherence after the study  
35 ends? [Prompt: has the study changed the way you will go about this?]  
36  
37

38 18. Are there any aspects of the research that we haven't talked about that you'd like to comment  
39 on?  
40  
41

42  
43  
44 Is there anything else you'd like to say?  
45  
46  
47

48 **THANK YOU**  
49  
50  
51  
52  
53  
54  
55

56 *The ACTiF Project is funded by the National Institute for Health Research's Programme Grants for*  
57 *Applied Research.*  
58  
59  
60

## Additional File 03 - Quantitative results from process evaluation

**Table a. Key dates in process evaluation by participant**

| Study ID | Interview Date | Baseline date | 5 month follow up date | Date of first intervention meeting | Time in the trial at interview (days) | Time since first intervention session at interview (days) | Time in trial at follow up (days) |
|----------|----------------|---------------|------------------------|------------------------------------|---------------------------------------|-----------------------------------------------------------|-----------------------------------|
| R02/02   | 13/09/2016     | 06/07/2016    | 10/11/2016             | 05/08/2016                         | 69                                    | 39                                                        | 127                               |
| R02/03   | 09/09/2016     | 08/07/2016    | NA                     | 05/08/2016                         | 63                                    | 35                                                        | NA                                |
| R02/42   | 12/10/2016     | 15/07/2016    | 21/12/2016             | NA                                 | 89                                    | NA                                                        | 159                               |
| R02/07   | 15/11/2016     | 12/07/2016    | 12/12/2016             | 09/09/2016                         | 126                                   | 67                                                        | 153                               |
| R02/12   | 02/11/2016     | 14/07/2016    | 03/01/2017             | 05/10/2016                         | 111                                   | 28                                                        | 173                               |
| R02/52   | 03/02/2017     | 04/07/2016    | 22/11/2016             | 05/10/2016                         | 214                                   | 121                                                       | 141                               |
| R01/44   | 01/12/2016     | 07/07/2016    | 16/11/2016             | 08/11/2016                         | 147                                   | 23                                                        | 132                               |

|        |            |            |            |            |     |     |     |
|--------|------------|------------|------------|------------|-----|-----|-----|
| R01/48 | 17/01/2017 | 04/07/2016 | 15/11/2016 | 13/10/2016 | 197 | 96  | 134 |
| R01/49 | 30/01/2017 | 22/07/2016 | 07/12/2016 | 10/10/2016 | 192 | 112 | 138 |
| R01/54 | 21/03/2017 | 25/07/2016 | 13/12/2016 | 02/11/2016 | 239 | 139 | 141 |
| R01/39 | 27/02/2017 | 02/08/2016 | 21/12/2016 | 03/11/2016 | 209 | 116 | 141 |
| R01/02 | 06/12/2016 | 31/08/2016 | 25/01/2017 | 15/08/2016 | 97  | 113 | 147 |
| R01/40 | 05/12/2016 | 05/09/2016 | 17/02/2017 | 05/10/2016 | 91  | 61  | 165 |
| R01/42 | 03/10/2016 | 12/09/2016 | 15/02/2017 | 15/08/2016 | 21  | 49  | 156 |

For peer review only

**Table b. Interventionist-generated motivation data (intervention arm)** R02/42, R02/49, R02/15 and R01/48 were all missing

| Participant ID | Date           | Consent Visit Motivation Rating | Was Participant motivation too low Answer Yes/No |
|----------------|----------------|---------------------------------|--------------------------------------------------|
| R02/39         | 05.08.16       | 7                               | No                                               |
| R02/40         | 23.08.16       | 4                               | No                                               |
| R02/02         | 05.08.16       | 7                               | No                                               |
| R02/03         | 03.08.16       | 1                               | No                                               |
| R02/43         | 12.08.16       | 7                               | No                                               |
| R02/05         | 22.08.16       | 5                               | No                                               |
| R02/45         | 18.08.16       | 7                               | No                                               |
| R02/07         | 09.08.16       | 7                               | No                                               |
| R02/48         | 05.10.16       | 7                               | No                                               |
| R02/10         | 14.09.16       | 7                               | No                                               |
| R02/11         | 28.09.16       | 7                               | No                                               |
| R02/50         | 26.09.16       | 7                               | No                                               |
| R02/12         | 05.10.16       | 7                               | No                                               |
| R02/52         | 03.10.16       | 7                               | No                                               |
| R01/39         | 03.11.16       | 7                               | Page missing from report                         |
| R01/02         | 16.09.16       | 7                               | No                                               |
| R01/03         | 03.10.16       | 5                               | No                                               |
| R01/40         | 05.10.16       | 7                               | Page missing from report                         |
| R01/42         | 15.08.16       | 5                               | Page missing from report                         |
| R01/44         | 08.11.16       | 7                               | Page missing from report                         |
| R01/47         | 10.10.16       | 5                               | Yes                                              |
| R01/06         | 10.10.16       | 7                               | Page missing from report                         |
| R01/49         | 17.10.16       | 7                               | No                                               |
| R01/08         | 01.11.16       | 7                               | Page missing from report                         |
| R01/50         | Missing report |                                 |                                                  |
| R01/53         | 29.11.16       | 7                               | Not ticked                                       |
| R01/54         | Missing report |                                 |                                                  |
| R01/10         | 10.11.16       | 2                               | Not ticked                                       |
| R01/57         | 31.10.16       | 0                               | Yes                                              |



**Table c. Engagement**

|                                  | Adherence data collected (did not withdraw from data collection before 6m) n(%) | Total CFHH sessions Median (IQR) | Baseline adherence Median (IQR) |
|----------------------------------|---------------------------------------------------------------------------------|----------------------------------|---------------------------------|
| <b>Overall (n=33)</b>            | 29(88%)                                                                         | 3(1,8)                           | 20(2.1,47.8)                    |
| <b>Qualitative case studies</b>  |                                                                                 |                                  |                                 |
| <b>High adherence at end</b>     |                                                                                 |                                  |                                 |
| R01/39                           | Yes                                                                             | 1                                | 0                               |
| R02/07                           | Yes                                                                             | 2                                | 96.7                            |
| R01/40                           | Yes                                                                             | 9                                | 43.1                            |
| R02/52                           | Yes                                                                             | 13                               | 96.6                            |
| <b>Moderate adherence at end</b> |                                                                                 |                                  |                                 |
| R01/49                           | Yes                                                                             | 4                                | 13.2                            |
| <b>Low adherence at end</b>      |                                                                                 |                                  |                                 |
| R01/54                           | Yes                                                                             | 11                               | 44.8                            |
| R01/02                           | Yes                                                                             | 1                                | 30.2                            |
| R01/48                           | Yes                                                                             | 3                                | 1.8                             |
| R02/12                           | Yes                                                                             | 44                               | 10.2                            |
| R02/03                           | No                                                                              | 3                                | 5.4                             |
| R01/44                           | Yes                                                                             | 1                                | 19.5                            |
| <b>Withdrawn</b>                 |                                                                                 |                                  |                                 |
| R01/42                           | Yes                                                                             | 41                               | 21.1                            |
| R02/02                           | No                                                                              | 3                                | 92.5                            |
| R02/42                           | No                                                                              | 0                                | 4.2                             |

Note: R02/42, R02/02 withdrew from adherence data collection and from the intervention and R02/03 was lost to follow-up. R01/42 did not withdraw from data collection until the end of the study; they did not contribute sufficient data for the 150-180 day period.

**Table d. Activities: all participants**

|                                                | Self-monitoring adherence | Tailored education about treatment | Tailored patient stories (videos) | Personalised action plan/Personalised goal-setting | Tailored problem-solving  | Goal review; Rewards  |                                      |
|------------------------------------------------|---------------------------|------------------------------------|-----------------------------------|----------------------------------------------------|---------------------------|-----------------------|--------------------------------------|
|                                                | Clicks<br>How am I doing? | Clicks<br>Toolkit                  | Clicks<br>Videos                  | Clicks<br>Action Plan                              | Clicks<br>Problem Solving | Clicks<br>Coping Plan | Review sessions with Interventionist |
| <b>Mean (SD)†/Median* (IQR) overall (n=33)</b> | 11(5, 30)*                | 3(0, 7)*                           | 2(1, 3)*                          | 2(1, 7)*                                           | 3(0, 8)*                  | 1(0, 3)*              | 1(0.5)†                              |
| <b>Qualitative case studies</b>                |                           |                                    |                                   |                                                    |                           |                       |                                      |
| <b>High adherence at end</b>                   |                           |                                    |                                   |                                                    |                           |                       |                                      |
| R01/39                                         | 8                         | 3                                  | 1                                 | 1                                                  | 0                         | 1                     | 1                                    |
| R02/07                                         | 5                         | 1                                  | 1                                 | 1                                                  | 2                         | 0                     | 1                                    |
| R01/40                                         | 52                        | 0                                  | 1                                 | 1                                                  | 3                         | 0                     | 1                                    |
| R02/52                                         | 70                        | 5                                  | 3                                 | 1                                                  | 17                        | 1                     | 1                                    |
| <b>Medium adherence at end</b>                 |                           |                                    |                                   |                                                    |                           |                       |                                      |
| R01/49                                         | 30                        | 2                                  | 1                                 | 0                                                  | 1                         | 0                     | 1                                    |
| <b>Low adherence at end</b>                    |                           |                                    |                                   |                                                    |                           |                       |                                      |
| R01/54                                         | 24                        | 4                                  | 5                                 | 3                                                  | 4                         | 2                     | 1                                    |
| R01/02                                         | 3                         | 0                                  | 1                                 | 2                                                  | 0                         | 1                     | 2                                    |
| R01/48                                         | 38                        | 6                                  | 2                                 | 7                                                  | 7                         | 1                     | 1                                    |
| R02/12                                         | 98                        | 12                                 | 10                                | 13                                                 | 14                        | 8                     | 1                                    |
| R02/03                                         | 15                        | 12                                 | 1                                 | 25                                                 | 1                         | 14                    | 1                                    |
| R01/44                                         | 11                        | 0                                  | 2                                 | 4                                                  | 8                         | 3                     | 1                                    |
| <b>Withdrawn</b>                               |                           |                                    |                                   |                                                    |                           |                       |                                      |
| R01/42                                         | 69                        | 18                                 | 9                                 | 16                                                 | 20                        | 3                     | 2                                    |
| R02/02                                         | 3                         | 7                                  | 1                                 | 8                                                  | 8                         | 7                     | 1                                    |
| R02/42                                         | 0                         | 0                                  | 0                                 | 0                                                  | 0                         | 0                     | 0                                    |

1  
2  
3  
4  
5  
6  
7  
8  
9  
10  
11  
12  
13  
14  
15  
16  
17  
18  
19  
20  
21  
22  
23  
24  
25  
26  
27  
28  
29  
30  
31  
32  
33  
34  
35  
36  
37  
38  
39  
40  
41  
42  
43  
44  
45  
46

**Table e. Activities: highly motivated participants**

(Those who answered ‘No’ to question, ‘Was the participant motivation too low) n=17. Some of these were missing or not answered n=14, only 2 answered ‘Yes’.

|                                                                | Self-monitoring adherence | Tailored education about treatment | Tailored patient stories (videos) | Personalised action plan/Personalised goal-setting | Tailored problem-solving | Goal review; Rewards |                                      |
|----------------------------------------------------------------|---------------------------|------------------------------------|-----------------------------------|----------------------------------------------------|--------------------------|----------------------|--------------------------------------|
|                                                                | Clicks am I doing?        | Clicks How Toolkit                 | Clicks Videos                     | Clicks Action Plan                                 | Clicks Problem Solving   | Clicks Coping Plan   | Review sessions with Interventionist |
| <b>High motivation Mean (SD)†/Median* (IQR) overall (n=17)</b> | 16 (5 33)*                | 5 (2 ,12)*                         | 3 (1 , 4)*                        | 4 (2 , 12)*                                        | 4(2 , 11)*               | 1(1 , 7)*            | 1.12(0.33)†                          |
| <b>Qualitative case studies (high motivation)</b>              |                           |                                    |                                   |                                                    |                          |                      |                                      |
| <b>R02/07</b>                                                  | 5                         | 1                                  | 1                                 | 1                                                  | 2                        | 0                    | 1                                    |
| <b>R02/52</b>                                                  | 70                        | 5                                  | 3                                 | 1                                                  | 17                       | 1                    | 1                                    |
| <b>R01/49</b>                                                  | 30                        | 2                                  | 1                                 | 0                                                  | 1                        | 0                    | 1                                    |
| <b>R01/02</b>                                                  | 3                         | 0                                  | 1                                 | 2                                                  | 0                        | 1                    | 2                                    |
| <b>R02/12</b>                                                  | 98                        | 12                                 | 10                                | 13                                                 | 14                       | 8                    | 1                                    |
| <b>R02/03</b>                                                  | 15                        | 12                                 | 1                                 | 25                                                 | 1                        | 14                   | 1                                    |
| <b>R02/02</b>                                                  | 3                         | 7                                  | 1                                 | 8                                                  | 8                        | 7                    | 1                                    |

Table f. Process Outcomes

|                                 | Accurate awareness of adherence                                       | Increased Motivation                                                                         | Increased necessity and decreased concern / beliefs Motivation |                                    | Increased self-efficacy /                                                                               | Motivation                             | Increased habit /            | Reduced CHAOS                | Reduced barriers                           |
|---------------------------------|-----------------------------------------------------------------------|----------------------------------------------------------------------------------------------|----------------------------------------------------------------|------------------------------------|---------------------------------------------------------------------------------------------------------|----------------------------------------|------------------------------|------------------------------|--------------------------------------------|
|                                 | Subjective adherence (0-100): Medication Adherence Data Questionnaire | Change in BMQ question 'I want to do all my prescribed medications in the next 2 weeks (0-7) | Change in BMQ Necessities score (2-5)                          | Change in BMQ Concerns score (1-3) | Change in BMQ question 'I am confident I can do all my prescribed medications in the next 2 weeks (0-7) | Change in PAM activation score (0-100) | Change in SRBAI score (0-28) | Change in CHAOS score (0-24) | Change in no. of BMQ barriers ticked (0-6) |
| <b>n Overall</b>                | 30                                                                    | 31                                                                                           | 31                                                             | 31                                 | 31                                                                                                      | 31                                     | 31                           | 31                           | 31                                         |
| <b>Mean (SD) overall</b>        | 2.07(27.87)                                                           | -0.1(1.27)                                                                                   | 0.26(0.58)                                                     | -0.19(0.31)                        | 0.06(1.79)                                                                                              | 2.38(14.01)                            | 0.32(3.92)                   | 0.1(2.75)                    | -1.84(3.44)                                |
| <b>Qualitative case studies</b> |                                                                       |                                                                                              |                                                                |                                    |                                                                                                         |                                        |                              |                              |                                            |
|                                 | baseline(change)<br>%                                                 | baseline (change)                                                                            |                                                                |                                    | baseline (change)                                                                                       |                                        |                              |                              |                                            |
| <b>High adherence at end</b>    |                                                                       |                                                                                              |                                                                |                                    |                                                                                                         |                                        |                              |                              |                                            |
| R01/39                          | 85(14)                                                                | 7(0)                                                                                         | 0.5                                                            | -0.4                               | 7(0)                                                                                                    | -5.9                                   | -2                           | 2                            | -4                                         |
| R02/07                          | 100(-2)                                                               | 7(0)                                                                                         | 0.2                                                            | -0.2                               | 7(0)                                                                                                    | 0                                      | 1                            | -5                           | -3                                         |
| R01/40                          | 92(8)                                                                 | 7(0)                                                                                         | 0.6                                                            | -0.2                               | 5(1)                                                                                                    | 7.2                                    | -9                           | 0                            | 1                                          |
| R02/52                          | 95(-25)                                                               | 7(0)                                                                                         | 0.3                                                            | -0.2                               | 7(0)                                                                                                    | 4.9                                    | 3                            | -1                           | 1                                          |

1  
2  
3  
4  
5  
6  
7  
8  
9  
10  
11  
12  
13  
14  
15  
16  
17  
18  
19  
20  
21  
22  
23  
24  
25  
26  
27  
28  
29  
30  
31  
32  
33  
34  
35  
36  
37  
38  
39  
40  
41  
42  
43  
44  
45  
46

|                             |         |       |      |      |       |       |    |    |    |
|-----------------------------|---------|-------|------|------|-------|-------|----|----|----|
|                             |         |       |      |      |       |       |    |    |    |
| R01/49                      | 100(0)  | 7(0)  | -0.8 | -0.7 | 7(0)  | 9.9   | -1 | 0  | -4 |
| <b>Low adherence at end</b> |         |       |      |      |       |       |    |    |    |
| R01/54                      | 60(-10) | 7(-1) | -0.3 | 0.4  | 6(0)  | -7.9  | 1  | -1 | 6  |
| R01/02                      | 55(16)  | 7(0)  | 0.8  | -0.2 | 2(3)  | 0     | -1 | -1 | -2 |
| R01/48                      | 0(100)  | 7(0)  | 0.9  | -0.8 | 6(0)  | 0     | 0  | 0  | -2 |
| R02/12                      | NA      | 7(0)  | -0.1 | -0.7 | 4(0)  | 14.6  | -3 | -2 | -5 |
| R02/03                      | 50(NA)  | 1(NA) | NA   | NA   | 2(NA) | NA    | NA | NA | NA |
| R01/44                      | 0(0)    | 7(0)  | 1.4  | 0.2  | 5(-4) | -16.6 | 0  | -1 | -5 |
| <b>Withdrawn</b>            |         |       |      |      |       |       |    |    |    |
| R01/42                      | 0(0)    | 5(-1) | -0.3 | -0.1 | 4(0)  | -5    | -1 | 5  | -6 |
| R02/02                      | 80(10)  | 7(0)  | 0.1  | -0.5 | 7(0)  | 9.2   | 2  | -1 | 1  |
| R02/42                      | 100(0)  | 7(0)  | 0.9  | 0    | 7(0)  | -12.1 | 1  | 7  | -1 |

Table g. Intermediate Outcomes

|                                                               | End of trial adherence<br>(day 150-180)♦ | Change in Objective<br>adherence♦ (%) | Change in<br>FEV1            | Number of<br>exacerbations in 6<br>months |
|---------------------------------------------------------------|------------------------------------------|---------------------------------------|------------------------------|-------------------------------------------|
| <b>Mean (SD)<sup>+</sup>/ Median (IQR)*</b><br>overall (n=33) | <u>34.7 ( 0.4 , 78. )*</u>               | <u>1.25( -5.8 , 36.3 )*</u>           | <u>0.1(0.51)<sup>+</sup></u> | <u>1( 0 , 2 )*</u>                        |
| <b>Qualitative case studies</b>                               |                                          |                                       |                              |                                           |
| <b>High adherence at end</b>                                  |                                          |                                       |                              |                                           |
| R01/39                                                        | 95.2                                     | 95.16                                 | -0.02                        | 1                                         |
| R02/07                                                        | 93.5                                     | -3.12                                 | NA                           | 0                                         |
| R01/40                                                        | 88.2                                     | 45.07                                 | 0.22                         | 0                                         |
| R02/52                                                        | 83.9                                     | -12.68                                | -0.13                        | 0                                         |
| <b>Medium adherence at end</b>                                |                                          |                                       |                              |                                           |
| R01/49                                                        | 68.3                                     | 55.06                                 | -0.12                        | 3                                         |
| <b>Low adherence at end</b>                                   |                                          |                                       |                              |                                           |
| R01/54                                                        | 29                                       | -15.8                                 | -0.03                        | 2                                         |
| R01/02                                                        | 29                                       | -1.14                                 | 0                            | 0                                         |
| R01/48                                                        | 5.2                                      | 3.34                                  | 1.07                         | 0                                         |
| R02/12                                                        | 0                                        | -10.23                                | -0.21                        | 0                                         |
| R02/03                                                        | 0                                        | -5.42                                 | NA                           | NA                                        |
| R01/44                                                        | 0                                        | -19.54                                | 0.9                          | 1                                         |
| <b>Withdrawn</b>                                              |                                          |                                       |                              |                                           |
| R01/42                                                        | NA                                       | NA                                    | 0                            | 0                                         |
| R02/02                                                        | NA                                       | NA                                    | -0.04                        | 3                                         |
| R02/42                                                        | NA                                       | NA                                    | 0.35                         | 1                                         |

♦ Normative numerator adjusted adherence

Additional File 04: Joint display table (data sources in **bold**)

| # | Logic model column / construct                                | Quantitative                                                                            | Qualitative                                                                                                                                                             | Convergence code |
|---|---------------------------------------------------------------|-----------------------------------------------------------------------------------------|-------------------------------------------------------------------------------------------------------------------------------------------------------------------------|------------------|
|   | <b>INPUTS</b>                                                 |                                                                                         |                                                                                                                                                                         |                  |
| 1 | MDT introduction to CFHealthHub                               | -                                                                                       | <b>Chief investigator reported:</b> introducing MDT to concept behind and application of CFHH.                                                                          | -                |
| 2 | CF Clinicians aware of the importance of monitoring adherence | -                                                                                       | <b>Chief investigator reported:</b> briefing collaborating MDTs. Reported change agents at centres internalised idea; some residual scepticism among senior physicians. | -                |
| 3 | Prescription data                                             | Study team found adherence levels of over 100% ( <b>Implementation log, 01 Dec 16</b> ) | Late identification of prescription changes found to be responsible. ( <b>Minutes, Trial Management Group Meeting 10 Jan 17</b> )                                       | Expansion        |
| 4 | Chipped nebuliser                                             | -                                                                                       | Devices ordered centrally by CTRU were delivered to sites on 20th May 2016 and processed for distribution on 23rd June 2016. ( <b>Project manager emails</b> )          | -                |
| 5 | Qualcom-Hub (docking & upload)                                | -                                                                                       | Devices ordered centrally by CTRU were delivered to sites on 20th May 2016 and processed for distribution on 23rd June 2016 ( <b>Project manager emails</b> )           | -                |
| 6 | CFHealthHub website/app                                       | -                                                                                       | Available, but under development through trial ( <b>Additional File 01</b> )                                                                                            | -                |
| 7 | COM-BMQ questionnaire                                         | COM-BMQ questionnaire data was collected at baseline for all consenting participants    | -                                                                                                                                                                       | -                |

|    |                                    |                                                                                                                                                                                                                                                                                                                |                                                                                                                                                                                                                                                                                                                                                                                                                                                                                                                     |           |
|----|------------------------------------|----------------------------------------------------------------------------------------------------------------------------------------------------------------------------------------------------------------------------------------------------------------------------------------------------------------|---------------------------------------------------------------------------------------------------------------------------------------------------------------------------------------------------------------------------------------------------------------------------------------------------------------------------------------------------------------------------------------------------------------------------------------------------------------------------------------------------------------------|-----------|
|    | responses                          | (Additional File 04 - Table 8)                                                                                                                                                                                                                                                                                 |                                                                                                                                                                                                                                                                                                                                                                                                                                                                                                                     |           |
| 8  | Intervention manual                | -                                                                                                                                                                                                                                                                                                              | High levels of interventionist satisfaction with manual. R01 Interventionist 1 remarked that, “all the stuff in the manuals was really good.”                                                                                                                                                                                                                                                                                                                                                                       | -         |
| 9  | Interventionist training programme | <b>Structured questionnaire on interventionist confidence after training programme:</b><br>Interventionists (n=5) all averaged >8 for confidence across 11 questions. Isolated scores of <8 occurred three times: viewing charts/tables, completing report forms and understanding online training/assessment. | <b>In interviews</b> , interventionists reported high levels of satisfaction; one requested for more integration of research and intervention procedures. R01 Interventionist 1 remarked “You had the manual but I was missing bits”. She wanted more case studies and mock patients in the training to compensate for this. An interventionist (R01 MDT member 1), who was a social worker by background, found the training very good, indicating that it the training had acceptability beyond physiotherapists. | Expansion |
| 10 | Interventionist support            | -                                                                                                                                                                                                                                                                                                              | <b>Research team member (MH) reported</b> giving mentorship and that one site/trust received more support from the PI than the other. The main interventionist at the other site received support from the part-time interventionist who was a member of the multi-disciplinary team.                                                                                                                                                                                                                               | -         |
| 11 | Competency/Fidelity assessment     | <b>Structured instrument for the assessment of interventionist competence:</b> Digital recordings were made and assessed for fidelity by MA, MH and JB. Fidelity assessment instrument modified after discussion, in advance of use on full-scale RCT.                                                         | -                                                                                                                                                                                                                                                                                                                                                                                                                                                                                                                   | -         |



|                   |                                                       |                                                                                                                                                                                                                                                                                                                                                                                                                                                   |                                                                                                                                                                                                                                                                                                                                                                     |              |
|-------------------|-------------------------------------------------------|---------------------------------------------------------------------------------------------------------------------------------------------------------------------------------------------------------------------------------------------------------------------------------------------------------------------------------------------------------------------------------------------------------------------------------------------------|---------------------------------------------------------------------------------------------------------------------------------------------------------------------------------------------------------------------------------------------------------------------------------------------------------------------------------------------------------------------|--------------|
| 12                | Motivated and effective interventionists              | -                                                                                                                                                                                                                                                                                                                                                                                                                                                 | <b>In interviews</b> , interventionists reported that they were enthusiastic about the intervention                                                                                                                                                                                                                                                                 | -            |
| <b>ENGAGEMENT</b> |                                                       |                                                                                                                                                                                                                                                                                                                                                                                                                                                   |                                                                                                                                                                                                                                                                                                                                                                     |              |
| 13                | Clinicians accessing adherence data*                  | Clinicians did not access CFHH. ( <b>CFHH Click analytics</b> )                                                                                                                                                                                                                                                                                                                                                                                   | <b>In interviews</b> , interventionists talked about run charts occasionally being viewed when brought to MDT meetings by interventionists.                                                                                                                                                                                                                         | Confirmation |
| 14                | Adherence data tracking                               | <b>CFHH click analytics</b> showed interventionists accessing data before meetings                                                                                                                                                                                                                                                                                                                                                                | This was confirmed <b>in interviews</b> .                                                                                                                                                                                                                                                                                                                           | Confirmation |
| 15                | Participant accessing CFHealthHub                     | <b>Click analytics:</b> The median number of sessions over 5 (+/- 1) months was 3 (interquartile range 1 to 8, range 1-44, <b>Additional File 05 - Table c</b> ), with a mean duration of 36.1 (SD=23.9) minutes. The mean total duration of interaction time across the study was 49.3 (SD 44.8) minutes. The mean length of an interaction was 12.4 (SD=9.6) minutes. The median number of days in the trial with interactions was 2 (IQR=1,7). | Lack of usability was explained <b>in interviews</b> by initially difficult login procedures and the lack of a mobile app for most of the pilot trial, leading participants to access an unsatisfactory desktop version on their mobile.                                                                                                                            | Expansion    |
| 16                | Push notifications/reminders each week*               | -                                                                                                                                                                                                                                                                                                                                                                                                                                                 | <b>Programmer reported that</b> automated push notifications not available during pilot trial. <b>In interviews</b> , one participant and one interventionist, reported the spontaneous development of informal push notifications in which the interventionist was ringing up and praising the participant for accomplishments, thereby building the relationship. | -            |
| 17                | CFHealthHub Intervention sessions delivered according | <b>Collected via project-specific structured fidelity assessment instrument (#11)</b> . After discussion                                                                                                                                                                                                                                                                                                                                          | <b>Fidelity observations indicated:</b> limited discussion of motivations; communication style                                                                                                                                                                                                                                                                      | Expansion    |

|    |                                                       |                                                                                                                                                                                                                                                                                                                                                                                                                                                            |                                                                                                                                                                                                                                                                                      |           |
|----|-------------------------------------------------------|------------------------------------------------------------------------------------------------------------------------------------------------------------------------------------------------------------------------------------------------------------------------------------------------------------------------------------------------------------------------------------------------------------------------------------------------------------|--------------------------------------------------------------------------------------------------------------------------------------------------------------------------------------------------------------------------------------------------------------------------------------|-----------|
|    | to Manual (Fidelity)                                  | between MA, MH and JB summary scores were agreed for delivery of content 100% and quality of delivery: 60-92%. Co-author Judy Bradley is intending to publish this work elsewhere.                                                                                                                                                                                                                                                                         | sometimes paternalistic rather than autonomy-enabling; insufficient attention to most active ingredients.                                                                                                                                                                            |           |
| 18 | Initial session, and then review at each clinic visit | <b>Collected via click analytics.</b> Patient run charts reveal a disparity in when and whether these happened ( <b>Additional File 07</b> ).                                                                                                                                                                                                                                                                                                              | -                                                                                                                                                                                                                                                                                    | -         |
|    | <b>ACTIVITIES</b>                                     |                                                                                                                                                                                                                                                                                                                                                                                                                                                            |                                                                                                                                                                                                                                                                                      |           |
| 19 | Clinicians monitor adherence                          | -                                                                                                                                                                                                                                                                                                                                                                                                                                                          | Clinician access to adherence data was sporadic (see #13) and <b>staff interviews confirmed</b> that it was not monitored. <b>In an interview</b> , participant R01/02 described the research intervention as “parallel rather than integrated” with mainstream clinical management. | -         |
|    | <i>Intervention components for all participants</i>   |                                                                                                                                                                                                                                                                                                                                                                                                                                                            |                                                                                                                                                                                                                                                                                      |           |
| 20 | Self-monitoring adherence                             | <b>Click analytics:</b> 'How am I doing?' pages were the most frequently visited in terms of the total number of clicks during the trial. 30 (90.9%) participants clicked a median of 11 (range 5-30) times in 5 months, but sometimes in a single session ( <b>Additional File 05 – Table d</b> ). Access did not always result in good alignment between subjective and objective adherence ( <b>Additional File 05 – Tables f and g respectively</b> ). | <b>In interviews</b> , moderate and frequent users said they mostly valued this page for self-monitoring.                                                                                                                                                                            | Expansion |
| 21 | Tailored education about treatment                    | <b>Click analytics:</b> Toolkit clicked a median 3 (range 0-7) times ( <b>Additional File 05 – Table d</b> ).                                                                                                                                                                                                                                                                                                                                              | <b>In participant interviews</b> , the DNASE video was popular. Other pages were accessed                                                                                                                                                                                            | Expansion |

|    |                                                                   |                                                                                                                                                                                      |                                                                                                                                                                                                                                                     |           |
|----|-------------------------------------------------------------------|--------------------------------------------------------------------------------------------------------------------------------------------------------------------------------------|-----------------------------------------------------------------------------------------------------------------------------------------------------------------------------------------------------------------------------------------------------|-----------|
|    |                                                                   |                                                                                                                                                                                      | infrequently or when issues arose, when the information was viewed as “more down to earth” (R02/07) than technical manuals.                                                                                                                         |           |
| 22 | Tailored patient stories (videos)                                 | <b>Click analytics:</b> ‘Talking heads’ videos accessed a median 2 (range 1-3) times ( <b>Additional File 05 – Table d</b> ).                                                        | <b>In participant interviews</b> , these videos divided opinion. Some participants liked to know that they were not alone; others did not want to see videos of others with CF.                                                                     | Expansion |
|    | <i>Intervention components for those with adequate motivation</i> |                                                                                                                                                                                      |                                                                                                                                                                                                                                                     |           |
| 23 | Personalised goal-setting                                         | <b>Click analytics:</b> Participants set target adherence levels in CFHH ( <b>Additional File 05 – Table 3</b> ).                                                                    | <b>In interviews</b> , participants reported goal-setting, but it was not clear how much it came from patients and how much from interventionists.                                                                                                  | Expansion |
| 24 | Goal review                                                       | <b>Click analytics:</b> Mean (SD) review sessions 1 (0.5) ( <b>Additional File 05 – Table e</b> ).                                                                                   | -                                                                                                                                                                                                                                                   | -         |
| 25 | Personalised action plan                                          | <b>Click analytics:</b> Action plan pages clicked on median 2 (inter-quartile range 1-7) times ( <b>Additional File 05 – Table e</b> ).                                              | Disliked by some participants who, the interventionist from centre R01 <b>reported during an interview</b> , found writing down action plans like “being at school”                                                                                 | Expansion |
| 26 | Tailored problem-solving                                          | <b>Click analytics:</b> Problem solving and coping plan pages clicked on median 3 (inter-quartile range 0-8) and 1 (0-3) times respectively ( <b>Additional File 05 – Table e</b> ). | <b>In interviews</b> , one participant realised that when she goes to her friend’s house, rather than missing a treatment she could do it in the car or anywhere. One interventionist from centre R02 thought it important that the information was | Expansion |

|    |                                                     |                                                                                                                                                                                                                                                                                                                                                                                      |                                                                                                                                                                                                                                                                                                      |           |
|----|-----------------------------------------------------|--------------------------------------------------------------------------------------------------------------------------------------------------------------------------------------------------------------------------------------------------------------------------------------------------------------------------------------------------------------------------------------|------------------------------------------------------------------------------------------------------------------------------------------------------------------------------------------------------------------------------------------------------------------------------------------------------|-----------|
|    |                                                     |                                                                                                                                                                                                                                                                                                                                                                                      | “there if you need it” for patients.                                                                                                                                                                                                                                                                 |           |
|    | <b>IMMEDIATE OUTCOMES</b>                           |                                                                                                                                                                                                                                                                                                                                                                                      |                                                                                                                                                                                                                                                                                                      |           |
| 27 | Medical care informed by adherence                  | -                                                                                                                                                                                                                                                                                                                                                                                    | <b>Interviews</b> with PIs found that the trial and intervention ran alongside usual care rather than being informed by it (see also #13, #19).                                                                                                                                                      | -         |
|    | <i>For all participants</i>                         |                                                                                                                                                                                                                                                                                                                                                                                      |                                                                                                                                                                                                                                                                                                      |           |
| 28 | Acute awareness of adherence / increased Motivation | Answers to the <b>subjective adherence question (Additional File 05 – Table f)</b> were well aligned with <b>run charts (Additional File 07)</b> in those with high adherence. Alignment was more variable in those with moderate and poor adherence.                                                                                                                                | <b>In interviews</b> , some with high adherence used the CFHH “How am I doing page” (run charts) as a check (R02/07, R01/40); other high adherers did not (R01/49). Some felt that it increased their adherence, acknowledging that monitoring meant that they had, “...better make an effort here”. | Expansion |
| 29 | Increased necessity and decreased concern           | No change in the group averages for the <b>COM-BMQ</b> (incorporating Beliefs about Medicines Questionnaire - specific (Nebuliser adherence) 21-item validated self-report tool[1]) or Patient Activation Measure ( <b>PAM-13</b> ) (Health Style Assessment) assessment of patient knowledge, skill, and confidence for self-management[2]. ( <b>Additional File 05 – Table f</b> ) | -                                                                                                                                                                                                                                                                                                    | -         |
| 30 | Increased self-efficacy / Motivation                | No change in the group averages for a single question about confidence to adhere or the PAM-13. ( <b>Additional File 05 – Table f</b> )                                                                                                                                                                                                                                              | -                                                                                                                                                                                                                                                                                                    | -         |
|    | <i>For those with adequate</i>                      |                                                                                                                                                                                                                                                                                                                                                                                      |                                                                                                                                                                                                                                                                                                      |           |

1  
2  
3  
4  
5  
6  
7  
8  
9  
10  
11  
12  
13  
14  
15  
16  
17  
18  
19  
20  
21  
22  
23  
24  
25  
26  
27  
28  
29  
30  
31  
32  
33  
34  
35  
36  
37  
38  
39  
40  
41  
42  
43  
44  
45  
46

|    |                                        |                                                                                                                                                                                                                                                                                                                    |                                                                                                                                                                                                                                                                                                                                               |           |
|----|----------------------------------------|--------------------------------------------------------------------------------------------------------------------------------------------------------------------------------------------------------------------------------------------------------------------------------------------------------------------|-----------------------------------------------------------------------------------------------------------------------------------------------------------------------------------------------------------------------------------------------------------------------------------------------------------------------------------------------|-----------|
|    | <i>motivation</i>                      |                                                                                                                                                                                                                                                                                                                    |                                                                                                                                                                                                                                                                                                                                               |           |
| 31 | Increased self-efficacy/<br>Motivation | No change in the group averages for a single question about confidence to adhere or the <b>PAM-13. (Additional File 05 – Table f)</b>                                                                                                                                                                              | -                                                                                                                                                                                                                                                                                                                                             | -         |
| 32 | Increased habit / Reduced<br>CHAOS     | No change in the group averages for <b>Self-Report Behavioural Automaticity Index (SRBAI)</b> automaticity-specific subscale of the Self Report Habit index to capture habit-based behaviour patterns[3] or in the assessment of routine measure of <b>life chaos</b> [4]. ( <b>Additional File 05 – Table f</b> ) | -                                                                                                                                                                                                                                                                                                                                             | -         |
| 33 | Reduced barriers                       | No change in the group averages for The Beliefs about Medicines Questionnaire - specific (Nebuliser adherence) ( <b>BMQ 21-item</b> ) ( <b>Additional File 05 – Table f</b> )                                                                                                                                      | The tailored problem-solving modules (#26) were not widely used but, <b>in interviews</b> , party plans and nebuliser guides were cited as having removed barriers by those who did use this content. For instance, one participant was able to find the technical name for a part of a nebuliser for which he needed to order a replacement. | Expansion |
|    | <b>INTERMEDIATE OUTCOMES</b>           |                                                                                                                                                                                                                                                                                                                    |                                                                                                                                                                                                                                                                                                                                               |           |
| 34 | Treatment optimisation                 | -                                                                                                                                                                                                                                                                                                                  | <b>Interview data</b> revealed patients to be behaving in unexpected ways, for instance taking holidays from their treatment or not taking medication as prescribed.                                                                                                                                                                          | -         |
| 35 | Increased adherence                    | <b>Nebuliser data via CFHH:</b> Mean adherence across all participants was 10 (95% CI: -5.2 to 25.2) percent higher in the intervention than in the                                                                                                                                                                | -                                                                                                                                                                                                                                                                                                                                             | -         |

|  |  |                                                                                                                                                                                                                                                                                                                                                                                                                                                                                                                       |  |  |
|--|--|-----------------------------------------------------------------------------------------------------------------------------------------------------------------------------------------------------------------------------------------------------------------------------------------------------------------------------------------------------------------------------------------------------------------------------------------------------------------------------------------------------------------------|--|--|
|  |  | control arm. Within the case study participants (all intervention), an increase of 7.5% (95% CI: -8.2-23.1) in simple normative adherence with numerator adjustment can be observed in the intervention arm. Following month 1, adherence is consistently higher in the intervention arm with the greatest difference observed in month 5 (mean difference: 10.8, 95% CI: -11.44, 22.9). These differences would indicate a potentially clinically important difference between the intervention and usual care arms. |  |  |
|--|--|-----------------------------------------------------------------------------------------------------------------------------------------------------------------------------------------------------------------------------------------------------------------------------------------------------------------------------------------------------------------------------------------------------------------------------------------------------------------------------------------------------------------------|--|--|

- [1] R. Horne, J. Weinman, M. Hankins, The beliefs about medicines questionnaire: The development and evaluation of a new method for assessing the cognitive representation of medication, *Psychol. Health.* 14 (1999) 1–24. doi:10.1080/08870449908407311.
- [2] J.H. Hibbard, E.R. Mahoney, J. Stockard, M. Tusler, Development and testing of a short form of the patient activation measure., *Health Serv. Res.* 40 (2005) 1918–30. doi:10.1111/j.1475-6773.2005.00438.x.
- [3] B. Verplanken, S. Orbell, Reflections on Past Behavior: A Self-Report Index of Habit Strength<sup>1</sup>, *J. Appl. Soc. Psychol.* 33 (2003) 1313–1330. doi:10.1111/j.1559-1816.2003.tb01951.x.
- [4] M.D. Wong, C. a. Sarkisian, C. Davis, J. Kinsler, W.E. Cunningham, The Association Between Life Chaos, Health Care Use, and Health Status Among HIV-Infected Persons, *J. Gen. Intern. Med.* 22 (2007) 1286–1291. doi:10.1007/s11606-007-0265-6.

### Additional File 05 - Case-ordered descriptive matrix for fourteen case studies

*Qualitative findings in italics.* Otherwise, motivation, confidence, necessities, concerns, life chaos and subjective adherence (baselines and process outcomes) from self-report instruments (see Methods and Additional File 04). Engagement, activities and data captured by CFHealthHub.

| Case / baselines / context                                                                                                                                                                               | Engagement                                                                                                                                                                                   | Activities                                                                                                                                                                                              | Process outcomes                                                                                                            | Intermediate outcomes                                                              |
|----------------------------------------------------------------------------------------------------------------------------------------------------------------------------------------------------------|----------------------------------------------------------------------------------------------------------------------------------------------------------------------------------------------|---------------------------------------------------------------------------------------------------------------------------------------------------------------------------------------------------------|-----------------------------------------------------------------------------------------------------------------------------|------------------------------------------------------------------------------------|
| <b>High adherence (average &gt;80%) in last month of trial</b>                                                                                                                                           |                                                                                                                                                                                              |                                                                                                                                                                                                         |                                                                                                                             |                                                                                    |
| <b>R01/39.</b> High motivation, confidence and necessities, medium concerns, quite high chaos. <i>They got a lot of information about CF from other websites.</i>                                        | Used CFHH once. <i>Very engaged with interventionist and trial.</i>                                                                                                                          | <i>Didn't make plans – felt it was her responsibility to adapt her life; found others monitoring helpful. Didn't like videos or social aspects of website because of the reminder of her mortality.</i> | <i>Knowledge that clinicians could access treatment adherence information provided extra motivation to adhere.</i>          | End of trial adherence 95% (95% improvement).                                      |
| <b>R02/07.</b> High motivation, and confidence, medium-high necessity, medium concerns and chaos. Existing high adherer, <i>sees treatment as a “plan for longevity” rather than a “chore”.</i>          | Used CFHH twice. <i>Didn't find it useful or like the videos (doesn't want to see negative side of CF).</i>                                                                                  | Made action plan, accessed some modules once. <i>Found goal-setting with interventionist helpful.</i>                                                                                                   | Little change as already, motivated. Reduced CHAOS and barriers.                                                            | End of trial adherence 93% (3% decline).                                           |
| <b>R01/40.</b> High motivation, medium confidence and necessities, low concerns, medium-to-low chaos. <i>Was recruited soon after exacerbation.</i>                                                      | Had nine CFHH sessions. <i>“I've been logging on to track my progress... every two weeks to a month”. Finds others monitoring him helpful.</i>                                               | Frequent self-monitoring. <i>Compensates for slippages by planning to do the rest of his doses.</i>                                                                                                     | Motivation already high, but habit lacking. <i>Intervention has made him think about adherence more than he did before.</i> | End of trial adherence 88% (45% improvement). Variance over trial, but trajectory. |
| <b>R02/52.</b> High motivation, confidence and necessity, low concerns, low-medium chaos. Existing good adherer; <i>wanted something like a fitness tracker with feedback - messages on performance.</i> | 13 CFHH sessions. <i>Liked the more portable nebuliser, could take it away on work. CFHH session that precedes interventionist visit explained by interventionist testing login details.</i> | Frequent self-monitoring, regular use of tailored education and problem solving (fixing nebuliser problems) and some use of videos. <i>Wanted it expanding to physical activity.</i>                    | Motivation already high. Increased habit.                                                                                   | End of trial adherence 83% (12% decline).                                          |

| Case / baselines / context                                                                                                                                                                                                                               | Engagement                                                                                                                                                                                                                                                   | Activities                                                                                                                | Process outcomes                                    | Intermediate outcomes                                                                                                                                                   |
|----------------------------------------------------------------------------------------------------------------------------------------------------------------------------------------------------------------------------------------------------------|--------------------------------------------------------------------------------------------------------------------------------------------------------------------------------------------------------------------------------------------------------------|---------------------------------------------------------------------------------------------------------------------------|-----------------------------------------------------|-------------------------------------------------------------------------------------------------------------------------------------------------------------------------|
| <b>Moderate adherence (average 50-80%) in last month of trial</b>                                                                                                                                                                                        |                                                                                                                                                                                                                                                              |                                                                                                                           |                                                     |                                                                                                                                                                         |
| <b>R01/49.</b> High motivation, confidence, medium-high necessity and concerns low chaos. <i>Participated to 'prove' themselves to their physiotherapist; poor awareness of own adherence not improved over course of trial.</i>                         | 4 CFHH sessions                                                                                                                                                                                                                                              | Used problem-solving modules and self-monitoring, but no action plan.                                                     | Increased motivation, reduced barriers.             | End of trial adherence 68% (55% improvement). An important improvement from low adherence, but subjective adherence still poorly 'calibrated' with objective adherence. |
| <b>Poor adherence (&gt;50%) in last month of trial</b>                                                                                                                                                                                                   |                                                                                                                                                                                                                                                              |                                                                                                                           |                                                     |                                                                                                                                                                         |
| <b>R01/54.</b> Professed high motivation and confidence, medium necessity, low concerns, medium to low chaos. <i>Wants the doctor "to notice" that they are adherent to their treatment, demotivated by the fact they don't.</i>                         | 44 CFHH sessions. <i>Appreciative of extrinsic motivation from face-to-face contact with interventionist.</i>                                                                                                                                                | Frequent self-monitoring; initially high use of action plans and problem solving. <i>Dislikes 'talking heads' videos.</i> | More barriers by the end of the trial.              | End of trial adherence 29% (16% decline), but run chart shows huge variance week by week.                                                                               |
| <b>R01/02.</b> High motivation, low confidence, medium necessity and concerns, high chaos. <i>Dissatisfaction at service reconfiguration: moved across from Poole to Southampton during trial. Upset that wider team isn't noticing their adherence.</i> | Used CFHH once <i>but had technical problems.</i> <i>Appreciative of interventionist: "Having a personal contact and someone to guide you through it is really useful"</i> <i>Wider team not talking about adherence: "parallel rather than integrated".</i> | Two review sessions with interventionist.                                                                                 | Reduced CHAOS and barriers; increased self-efficacy | Lack of pre-post change not contradicted by the run chart which shows improvement.                                                                                      |



| Case / baselines / context                                                                                                                                                                                                                                                                                             | Engagement                                                                                                        | Activities                                                                                                                                                   | Process outcomes                                              | Intermediate outcomes                                                                                                                                                                                   |
|------------------------------------------------------------------------------------------------------------------------------------------------------------------------------------------------------------------------------------------------------------------------------------------------------------------------|-------------------------------------------------------------------------------------------------------------------|--------------------------------------------------------------------------------------------------------------------------------------------------------------|---------------------------------------------------------------|---------------------------------------------------------------------------------------------------------------------------------------------------------------------------------------------------------|
| <p><b>R01/48.</b> professed high motivation and confidence, medium-high necessities and concerns; medium chaos. <i>This 69-year old doesn't like nebulising; "can't teach an old dog new tricks". No belief in benefit of nebulised medication. Poor awareness of own adherence. Altruistic trial participant.</i></p> | <p>Used CFHH three times. <i>Access problems (passwords, etc) - gave up.</i></p>                                  | <p>Some engagement with toolkit, action plans and problem-solving, <i>didn't like the videos.</i> Engagement drops off as soon as the last meeting over.</p> | <p>No change in process outcomes.</p>                         | <p>End of trial adherence 5% (3% improvement). <i>Said was making an effort for the trial.</i> In line with this, objective adherence was high (~80%) for weeks 6-21</p>                                |
| <p><b>R02/12.</b> High motivation, medium to low confidence, medium to high necessity and concerns, medium chaos.</p>                                                                                                                                                                                                  | <p>Started off engaged, lots of CFHH use and two intervention sessions in first 100 days, nothing thereafter.</p> | <p>Made plans, liked website, checked graphs. <i>Liked face-to-face interaction with interventionist.</i></p>                                                | <p>Decreased chaos and barriers but also decreased habit.</p> | <p>Initial improvement in adherence (up to 100% between weeks seven and nine after first intervention not sustained over time. Review stimulates brief improvement at week 15, again not sustained.</p> |

| Case / baselines / context                                                                                                                                                                                                                                                                                                                         | Engagement                                                                                                                                                                                     | Activities                                                                                                                                                                                                              | Process outcomes                       | Intermediate outcomes                                       |
|----------------------------------------------------------------------------------------------------------------------------------------------------------------------------------------------------------------------------------------------------------------------------------------------------------------------------------------------------|------------------------------------------------------------------------------------------------------------------------------------------------------------------------------------------------|-------------------------------------------------------------------------------------------------------------------------------------------------------------------------------------------------------------------------|----------------------------------------|-------------------------------------------------------------|
| <p><b>R02/03.</b> Low motivation and confidence, medium necessities, concerns and chaos. <i>Treatment is something that he has to do but doesn't want to do it, or think about CF. Forgets about treatment because of busy lifestyle. Prioritises other things above health. Knows that this doesn't end well, but no readiness to change.</i></p> | <p>Minimal short-term engagement with CFHH. <i>Interventionist notes that participant has always been difficult to get hold of.</i></p>                                                        | <p>Made action and coping plans, checked graphs.</p>                                                                                                                                                                    | <p>No process data at follow-up.</p>   | <p>Withdrew from treatment early.</p>                       |
| <p><b>R01/44.</b> High motivation, medium confidence, necessities, low concerns, high chaos (<i>"I can't seem to get into a routine"</i>). Recruited during exacerbation: baseline artificially high. Intervention 1 visit didn't happen until Week 17. <i>Participant describes self as "uncompliant" except around inpatient stays.</i></p>      | <p>One CFHH session (at intervention visit 1). Interventionist appears not to have done correct preparation. Only participant rated by an interventionist as having inadequate motivation.</p> | <p><i>Participant confirms that he made action plan, coping plan and checked graphs with interventionist but chaotic lifestyle and low motivation prevented further use. Admits only has a routine in hospital.</i></p> | <p>No change in process variables.</p> | <p>Initial spikes of adherence not sustained over time.</p> |

| <b>Withdrawn</b>                                                                                                                                                                                                                                                            |                                                                                                                                                  |                                                                                                                           |                                     |                                                                                                                                                                                    |
|-----------------------------------------------------------------------------------------------------------------------------------------------------------------------------------------------------------------------------------------------------------------------------|--------------------------------------------------------------------------------------------------------------------------------------------------|---------------------------------------------------------------------------------------------------------------------------|-------------------------------------|------------------------------------------------------------------------------------------------------------------------------------------------------------------------------------|
| <b>Case / baselines / context</b>                                                                                                                                                                                                                                           | <b>Engagement</b>                                                                                                                                | <b>Activities</b>                                                                                                         | <b>Process outcomes</b>             | <b>Intermediate outcomes</b>                                                                                                                                                       |
| <b>R01/42.</b> Medium motivation, low confidence, medium-high necessity, medium concerns, low chaos. <i>Originally an i-neb user. Does not think nebulising three times a day is achievable. Moved house during study. No broadband – so didn't do nebulisations.</i>       | <i>Loved the website and shared it. 41 CFHH sessions. Intervention visit 1 reported to be chaotic.</i>                                           | Made action plan.                                                                                                         | Little change in process variables. | Interview might have triggered brief increase in nebuliser use, when <i>participant realised nebulisations were being logged even when he wasn't plugging it in.</i>               |
| <b>R02/02.</b> High motivation and confidence, medium-high necessity low concerns and chaos. <i>Interview shows them to be motivated by interventionist visit and qualitative interview (Hawthorne effect). Subjective adherence poorly aligned to objective adherence.</i> | Limited engagement. Three CFHH Sessions all on the same day.                                                                                     | Made an action plan <i>but reported that she didn't set goals because she thought she her adherence was already good.</i> | Little change in process variables. | Adherence run chart starts off high, but drops off quickly. Interview might have triggered brief increase in nebuliser use. Withdrew from collection of nebuliser data collection. |
| <b>R02/42.</b> High motivation and confidence, medium to high necessity, low concerns, medium chaos                                                                                                                                                                         | Withdrew - <i>didn't like the eTrac nebuliser - delivering the drug too quickly made them cough. Interventionist encouraged discontinuation.</i> | <i>Didn't look at the website.</i>                                                                                        | No change in process outcomes       | Assumed no change in adherence, but objective lacking.                                                                                                                             |

## ACTiF Pilot Statistical Report

L Mandefield

### Methods

### Outcomes

#### Feasibility outcomes

The primary objective of this study was to determine the feasibility of proceeding to a definitive trial. An external pilot randomised controlled trial to determine feasibility of a randomised controlled trial based on objective stop-go criteria related to:

- (a) participant recruitment;
- (b) participant retention; and,
- (c) quality of primary outcome data at 5 (+/- 1) months post randomisation.

These were assessed by

- i. The number of screened, eligible and recruited participants per month, per centre and overall;
- ii. The number and percentage of participants who complete their 5(+/-1) month post randomisation follow up;
- iii. The number of Fuchs criteria by exacerbation.

#### Clinical outcomes

The primary clinical outcome measure was the number of pulmonary exacerbations in the 5 (+/-1) month post-baseline follow-up period, defined according to a modified version of the Fuchs criteria. The original Fuchs criteria was 4 out of 16 symptoms leading to IV antibiotic treatment. An exacerbation of respiratory symptoms will be said to have occurred when a participant was treated with parenteral antibiotics for any one of the following 12 signs or symptoms:

1. change in sputum;
2. new or increased hemoptysis;
3. increased cough;
4. increased dyspnea;
5. malaise, fatigue, or lethargy;
6. temperature above 38 °C;
7. anorexia or weight loss;

- 1
- 2
- 3 8. sinus pain or tenderness;
- 4
- 5 9. change in sinus discharge.
- 6
- 7 10. change in physical examination of the chest, derived from notes by site staff.
- 8
- 9 11. decrease in pulmonary function by 10 percent or more from a previously recorded value, derived
- 10 from notes by site staff; or,
- 11
- 12 12. radiographic changes indicative of pulmonary infection, derived from notes by site staff.

13 The trial interventionist or prescribing clinician/nurse will collect data on the "exacerbations" form at the  
14 point of a participant starting a course of IV antibiotics.

15 The following secondary outcomes were also collected at baseline and 5 (+/-1) month follow up:

- 16
- 17
- 18 1. Body Mass Index (BMI).
- 19 2. Forced expiratory volume in 1 second (FEV1): standardised spirometry as a measure of condition
- 20 severity.
- 21 3. EuroQol EQ-5D-5L: generic health status measure for health economic analysis.
- 22 4. The Patient Activation Measure (PAM-13): assessment of patient knowledge, skill, and confidence
- 23 for self-management.
- 24 5. Confusion, Hubbub, and Order Scale (CHAOS 6-item): measure of life chaos.
- 25 6. Medication Adherence Data-3 items (MAD-3)
- 26 7. Self-Report Behavioural Automaticity Index (SRBAI)
- 27 8. Cystic Fibrosis Questionnaire-Revised (CFQ-R): disease specific health-related quality of life
- 28 instrument.
- 29 9. The Patient Health Questionnaire depression scale (PHQ-8): severity measure for depressive
- 30 disorders.
- 31 10. The General Anxiety Disorder 7-item anxiety scale (GAD-7): severity measure for anxiety.
- 32 11. The Capability Opportunity Motivation Behaviour Beliefs Questionnaire (COM- BMQ): This
- 33 questionnaire incorporates:
- 34 a. The Beliefs about Medicines Questionnaire - specific (Nebuliser adherence) (BMQ 21-item): a
- 35 validated self-report tool, customised by the author to identify perceived necessities and concerns
- 36 for nebuliser treatment.
- 37 b. The following project-specific items: one additional belief item, one intention item, one confidence
- 38 item, and a list of barriers. These will serve as a tailoring tool for the intervention and also as a
- 39 secondary outcome measure. 12. Subjective adherence single question: self-report estimate of
- 40 adherence as a percentage. Self-reported problems: identification of capability and opportunity
- 41 barriers to nebuliser adherence
- 42 13. Concomitant medications: bespoke instrument, designed for this research project.
- 43 14. Resource use form: interventionist collects data from a combination of hospital notes and the NHS
- 44 patient electronic system to determine 1) inpatient IV days 2) Routine clinic visits 3) Unscheduled
- 45 outpatient contacts 3) unscheduled inpatient stays.
- 46 15. Prescription: a monthly prescription check to both check for data transfer to CFHealthHub and
- 47 review for an indication that the prescription has changed or indication of microorganism e.g.
- 48 16. Adherence to prescribed medication
- 49 17. Any treatment with IV antibiotics
- 50
- 51
- 52
- 53
- 54
- 55
- 56
- 57
- 58
- 59
- 60

## Sample Size

Sample size calculation was based on estimating parameters within a certain amount of precision rather than hypothesis testing. The sample size for a feasibility study should be adequate to estimate the uncertain critical parameters (standard deviations for continuous outcomes; consent rates, event rates, attrition rates for binary outcomes) needed to inform the design of the full RCT with sufficient precision.

To assess recruitment rate, the external pilot RCT ran in two CF units for 12 months, with four months recruitment, one months 'run-in' period (the period between the consent and baseline visit), and 5 (+/-1) months follow up. To match the proposed recruitment rate of the main RCT, the target sample over the four months for which the pilot RCT was open, was 32 per centre (64 in total from the two pilot centres). We aimed to see a minimum of 75% of the recruitment target to be confident of the trial viability i.e. at least 48 patients in total consented and randomized in four months' of recruitment from two centres.

## Randomisation

Randomisation was conducted using a computer generated pseudo-random list with random permuted blocks of varying sizes, created and hosted by the Sheffield CTRU in accordance with their Standard Operating Procedures (SOPs) and was held on a secure server. ACTiF participants will be randomised in a 1:1 ratio, intervention to control arms, stratified by:

- Site;
- Number of IV days in previous 12 months as collected at consent visit (two categories will be (i) less than or equal to 14 days and (ii) greater than 14 days).

Study researchers accessed the allocation for each participant by logging in to the remote, secure internet-based randomisation system. Once a participant had consented to the study, the researcher logged into the randomisation system and entered basic demographic information. After this information had been entered the allocation for that participant was then revealed to the researcher.

Block randomisation with randomly varying block size of 2, 4 and 6 was used so that the sequence of allocation could not be predicted. The block sizes were determined by the trial statistician and block size was not revealed to any other member of the study team.

## Blinding

The trial statisticians remained blind until data freeze, at which point unblinded data was presented to them so checks could be carried out.

## Statistical Methods

All statistical analyses were performed in R version 3.3.1.

## Analysis Populations

The ITT population includes all participants for whom consent was obtained and who were randomised to treatment, regardless of whether they received the intervention or not. This is the

1  
2  
3 primary analysis set and endpoints were summarised for the ITT population unless otherwise  
4 stated.  
5

### 6 **Participant Flow**

7  
8 A CONSORT flow diagram was used to display data completeness and patient flow from first  
9 contact to final follow up.  
10

11 The number of participants recruited at each centre each month was presented. The number of  
12 participants who withdrew consent from the trial, withdrew from the intervention, withdrew from  
13 collection of the primary outcome, withdrew consent from adherence data collection and who  
14 were lost to follow up were presented overall, by treatment arm and site. The reasons for  
15 attrition, where given, were presented.  
16

### 17 **Patient reported outcome measures (PROMS)**

18  
19 The following PROMS were completed at baseline and 5 (+/-1) month follow up visit. For  
20 detailed methods of how these questionnaires were scored, please see the appendix.  
21

### 22 **Data completeness**

23  
24 A CONSORT flow diagram was used to display data completeness and patient throughput from  
25 first contact to final follow up.  
26

### 27 **Baseline characteristics**

28  
29 Participants' demographics (age, sex, ethnicity, IMD decile), physical measurements (weight,  
30 height, BMI), clinical measurements (FEV1, IV days in last registry year, Pseudomonas status,  
31 Adherence in first 2 weeks, Subjective adherence, Medication, Treatment burden) patient  
32 reported outcomes (EQ-5D-5L, PAM-13, CHAOS, MAD-3, SRBAI, CFQ-R, GAD-7,  
33 COMBMQ, PHQ-8). Imbalance between treatment arms was not tested statistically but were  
34 reported descriptively.  
35  
36

### 37 **Primary effectiveness analysis of clinical outcomes**

38  
39 The primary endpoint of the study is the number of exacerbations in a 5 (+/- 1) month period.  
40 Exacerbations were defined as being treated with IV antibiotics and meeting at least 1 Fuchs  
41 criteria.  
42

43 The number of exacerbations by participant were presented. The number and percentage of  
44 exacerbations with each Fuchs criteria were presented. The length of IV course was summarised  
45 by intervention arm for all exacerbations and for participants experiencing exacerbations.  
46

47 The primary effectiveness analysis used a negative binomial model and included all  
48 exacerbations in a 6 month follow up period. Participants who were not followed for this length  
49 were excluded. An adjusted model included IV days in the previous 12 months as a covariate.  
50 Although not prespecified, a further sensitivity analysis was carried out. This model included the  
51 number of days followed up as an offset. This allowed all consenting participants to be included.  
52 An adjusted offset model included IV days in the previous 12 months as a covariate.  
53  
54  
55  
56  
57  
58  
59  
60



## Secondary effectiveness analysis of clinical outcomes

### Patient reported outcome measures

Secondary outcomes were measured at baseline and 5 (+/-1) months post randomisation. The mean difference between treatment arms was calculated for each of the secondary outcomes, along with 95% confidence intervals using a multiple linear regression model. Adjustment for baseline and site was carried out and both unadjusted and adjusted results were presented.

### Adherence to medication

The time of inhalations of medication was recorded via chipped nebulisers. This data along with prescription data was used to calculate a number of different adherence measures. Adherence in people with CF is of key importance. For this reason, it was decided that 7 separate measures of adherence to prescribed medication were to be presented:

1. Total doses;
2. Unadjusted adherence;
3. Simple normative adherence (without numerator adjustment);
4. Sophisticated normative adherence (without numerator adjustment);
5. Simple normative adherence (with numerator adjustment);
6. Sophisticated normative adherence (with numerator adjustment);
7. Subjective single adherence.

Measures 1-6 are calculated daily based on the chipped nebuliser data and the dose prescribed that day. Means can be calculated for set periods, e.g. weekly.

The specific calculations of these adherence measured are described below.

#### Total doses taken

As a basic, unadjusted measure of adherence, the total number of doses taken for the time period will be calculated.

#### Unadjusted adherence

Adherence is typically calculated as the dose taken divided by the dose described per day.

#### Simple normative adherence (without numerator adjustment)

Quality of adherence reporting is dependent on the PWCF being prescribed the appropriate medications. Adjusting the denominator of the adherence calculation controls for treatment rationalisation to try reduce treatment burden, which is an approach often seen in people in CF. The simple normative adherence is calculated as follows:

1. If the participant does not have pseudomonas
  - Minimum denominator is set at 1 treatment/day.



2. If the participant has chronic pseudomonas
  - Minimum denominator is set at 3 treatments/day
3. The participant has chronic pseudomonas and intermittent inhaled antibiotic regimens
  - Minimum denominator is 3 treatments/day during 28 day 'on' period
  - Minimum denominator is 1 treatment/day during 28 day 'off' period
4. The participant has intermittent pseudomonas
  - Minimum denominator is 3 treatments/day for 1 or 3 months depending on the eradication regime
  - Minimum denominator is 1 treatment/day for the rest of the time

In calculating normative adherence an expected minimum prescription based on a patient's health state is needed. Most patients take a dose of a mucolytic, and patients meeting the criteria will take two doses of antibiotics. In adherence calculations, participants had their denominator amended to reflect their prescription. A complication arises in denominator adjustments when the antibiotic prescribed is one that is expected to be used in an alternating fashion (e.g. 28 days use, 28 days off). The antibiotic medications Aztreonam Lysine and Tobramycin are normally prescribed in this way; for patients with prescriptions for these medications with periods of more than 28 days without a prescription for an antibiotic, the denominator was adjusted to add in 2 doses / day. After 28 days of substituted antibiotic use, a 28 'day off' cycle was programmed. This cycle was continued until such time as another antibiotic prescription was present.

### **Sophisticated normative adherence (without numerator adjustment)**

The sophisticated normative adherence is calculated as follows:

1. If someone has 'mild genotype', is pancreatic sufficient and has FEV1 > 90%, without Pseudomonas and used <= 14 days intravenous antibiotics in the past 1 year.
  - There is no minimum target. Denominator is determined by the agreed prescription between clinicians and participants.
2. If someone is homozygous for class I-III CFTR mutation OR pancreatic insufficient OR FEV1 <= 90%, but without Pseudomonas and used <= 14 days intravenous antibiotics in the past 1 year. Minimum denominator is set at 1 treatment/day.
3. If the person has chronic pseudomonas AND/OR
  - the person used > 14 days intravenous antibiotics in the previous year Minimum denominator is set at 3 treatments/day
4. If the person has chronic pseudomonas AND/OR used > 14 days intravenous antibiotics in the previous year but is on intermittent inhaled antibiotic regimens
  - Minimum denominator is 3 treatments/day during 28 day 'on' period
  - Minimum denominator is 1 treatment/day during 28 day 'off' period
5. If someone has intermittent pseudomonas but used <= 14 days intravenous antibiotics in the past 1 year

- Minimum denominator is 3 treatments/day for 1 or 3 months depending on the eradication regime
- Minimum denominator is 1 treatment/day (or 0, i.e. no minimum target) depending on their genotype, pancreatic status and FEV1 for the rest of the time.

### **Numerator adjustment in simple and sophisticated normative case**

Numerator adjustment occurs only if a daily adherence measure is greater than 100%, thus the maximum daily adherence is set at 100%.

### **Subjective single adherence**

All participants will be asked to estimate their adherence as a percentage at baseline, clinic visits, 5(+/-1) months and any further visits up to 30th April 2017. These subjective measures were presented separately. The question referred to the previous 2 weeks.

### **Adherence summaries**

The mean and SD was calculated for each month of the trial by treatment arm. Weekly numerator adjusted normative adherence was calculated and a mean by treatment arm was calculated and presented as a line graph for the first 25 weeks from randomisation.

### **Intervention adherence**

The intervention comprised of:

- (a) a chipped nebuliser to collect adherence data
- (b) access for participants and interventionist to the adherence data summaries
- (c) an online platform (CFHealthHub) offering summaries of adherence and tailored modules to be used by the health professional when interacting with the participant and independently by the participant.

A number of metrics were collected from CFHealthHub including the timing and date of clicks and the page/module that was clicked on. Interactions with CFHH were defined as a series of clicks with no greater than 15 minute gaps between clicks. Length of each session was calculated and days with interactions were calculated by participant.

The mean, standard deviation (SD), median and interquartile range (IQR) for the CFHH metrics were calculated and presented by participant. The same summary statistics were also presented for length of all sessions. The timing of CFHH interactions in days from randomisation was plotted by participant. The number of clicks per page category (Home, How am I doing?, Treatment etc) was plotted in a bar chart and also presented in a table by participant and by session.

Date and time of sessions with the interventionist were also recorded. The number of sessions with an interventionist and the length of sessions by participant were summarised in a table.

### **Clinic visits**

The number of clinic visits completed by each participant excluding consent and 5 month follow up was recorded. Summary statistics were presented by treatment arm to assess whether ascertainment bias occurred in the intervention arm.

### **Safety analysis**

The number of Adverse Events (AEs) and Serious Adverse Events (SAEs) was recorded and presented by treatment arm. These events were further categorised by the type of adverse event and whether they were related to the intervention.

### **Protocol non compliances**

The number and type of protocol non compliances were presented descriptively.

### **Summary of missing data**

The number of missing values or scores for each of the primary and secondary outcomes was presented by baseline and 5 (+/-1) months post randomisation and by treatment arm. Furthermore, the number and percentage of missing items was presented for each of these questionnaires.

## Results

### Participant Flow

Participants were recruited for 4 months across 2 sites. The CONSORT flow diagram (Fig.1) shows the flow of participants through the trial. 32 participants were randomised at each site. 33 participants were randomised to the intervention arm and 31 participants were randomised to usual care. A total of 59 participants completed the 5 (+/- 1) month follow up visit (Intervention = 31, Usual care = 28).

A total of 8 participants discontinued the trial before the follow up visit (Intervention = 4, Usual care = 4). Of these discontinuations, 5 no longer had their adherence data collected and the same 5 participants did not have their primary outcome collected. Of those who did not continue with primary outcome collection, 2 participants died, 1 withdrew consent and 2 were lost to follow up.

Following the 5 (+/-1) month visit, adherence data and primary outcome data was collected. 2 participants withdrew from adherence data collection during this time (Intervention =1, Usual care =1). 59 participants completed primary outcome data collection up to study completion on 30th April 2017 (Intervention = 31, Usual care =28).

1  
2  
3  
4  
5  
6  
7  
8  
9  
10  
11  
12  
13  
14  
15  
16  
17  
18  
19  
20  
21  
22  
23  
24  
25  
26  
27  
28  
29  
30  
31  
32  
33  
34  
35  
36  
37  
38  
39  
40  
41  
42  
43  
44  
45  
46  
47  
48  
49  
50  
51  
52  
53  
54  
55  
56  
57  
58  
59  
60

**Recruitment by centre and month**

For peer review only

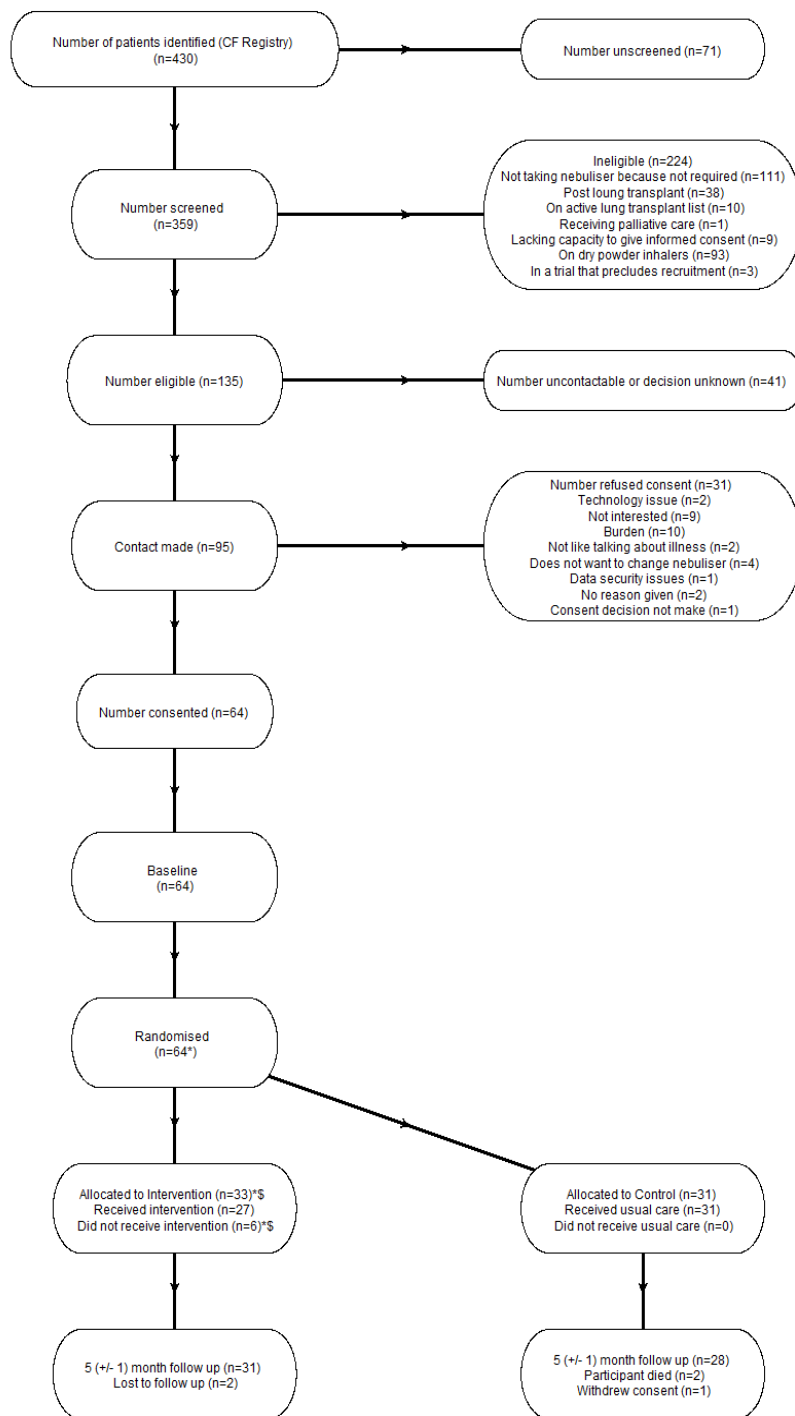

Figure 1: CONSORT flow diagram for ACtiF pilot study.

Table 1: Participants consented by centre and by month

|        | June 16 | July 16 | Aug 16 | Sept 15 | Total |
|--------|---------|---------|--------|---------|-------|
| Site A | 4       | 16      | 7      | 5       | 32    |
| Site B | 2       | 17      | 5      | 8       | 32    |

**Attrition by Centre and Treatment arm**

Table 2: Attrition presented by treatment arm and site.

|                          |              | n  | Withdrew<br>Consent (%) | Died<br>(%) | Lost to Follow<br>up (%) | Overall<br>(%) |
|--------------------------|--------------|----|-------------------------|-------------|--------------------------|----------------|
| <b>Overall</b>           |              | 64 | 1(17%)                  | 2(33%)      | 2(40%)                   | 5(7.8%)        |
| <b>Treatment<br/>arm</b> | Intervention | 33 | 0(0%)                   | 0(0%)       | 2(40%)                   | 2(6.1%)        |
|                          | Usual Care   | 31 | 1(20%)                  | 2(40%)      | 0(0%)                    | 3(9.7%)        |
| <b>Site</b>              | Site A       | 32 | 0(0%)                   | 1(20%)      | 1(20%)                   | 2(6.2%)        |
|                          | Site B       | 32 | 1(20%)                  | 1(20%)      | 1(20%)                   | 3(9.4%)        |

### Baseline characteristics

Table 4 shows the baseline characteristics of participants randomised by treatment arm. 33 participants were randomised to the intervention and 31 were randomised to usual care. The average age of participants was 29.7 (SD=11.5). Participants in the intervention arm were slightly older (median=28, IQR=(21,37)) than those in the usual care arm (median=26, IQR=(20,34)). Table 5 shows the CF measures presented by treatment arm. Tables 6-7 show the baseline questionnaire scores presented by treatment arm.

### Baseline demographics

Table 3: Baseline demographics by treatment arm

|                             | Intervention | Control      | Overall            |
|-----------------------------|--------------|--------------|--------------------|
| <b>Age</b>                  |              |              |                    |
| n                           | 33           | 31           | 64                 |
| Mean(SD)                    | 31.6(13.3)   | 27.8(8.9)    | 29.7(11.5)         |
| Median(IQR)                 | 28(21,37)    | 26(20,34)    | 27(21,36)          |
| Min,Max                     | (16,69)      | (16,50)      | (16,69)            |
| <b>Sex</b>                  |              |              |                    |
| Male                        | 18(54.5%)    | 18(58.1%)    | 36(56.2%)          |
| Female                      | 15(45.5%)    | 13(41.9%)    | 28(43.8%)          |
| <b>Socioeconomic Status</b> |              |              |                    |
| Most deprived               | 6(18.2%)     | 1(3.2%)      | 7(10.9%)           |
| High deprivation            | 4(12.1%)     | 7(22.6%)     | 11(17.2%)          |
| Average                     | 8(24.2%)     | 8(25.8%)     | 16(25%)            |
| Low deprivation             | 6(18.2%)     | 9(29%)       | 15(23.4%)          |
| Least deprived              | 9(27.3%)     | 6(19.4%)     | 15(23.4%)          |
| <b>Weight (KG)</b>          |              |              |                    |
| n                           | 33           | 31           | 64                 |
| Mean(SD)                    | 65.5(18)     | 63.7(15.6)   | 64.6(16.8)         |
| Median(IQR)                 | 63(53,76)    | 62.9(49,74)  | 63(52.9,74.3)      |
| Min,Max                     | (35,128)     | (35.6,103.7) | (35,128)           |
| <b>Height (cm)</b>          |              |              |                    |
| n                           | 33           | 31           | 64                 |
| Mean(SD)                    | 168.6(10.5)  | 167.7(9.6)   | 168.2(10)          |
| Median(IQR)                 | 170(162,177) | 168(159,175) | 168.5(160.5,175.5) |
| Min,Max                     | (147,193)    | (149,186)    | (147,193)          |
| <b>BMI</b>                  |              |              |                    |
| n                           | 33           | 31           | 64                 |
| Mean(SD)                    | 22.8(5)      | 22.4(4.3)    | 22.6(4.6)          |



|             |                 |                 |                   |
|-------------|-----------------|-----------------|-------------------|
| Median(IQR) | 22.2(19.7,25.3) | 22.1(19.1,25.4) | 22.1(19.55,25.35) |
| Min,Max     | (15.8,42.8)     | (16,33.9)       | (15.8,42.8)       |

Table 4: Baseline CF measures by treatment arm

|                                                                | Intervention    | Control         | Overall         |
|----------------------------------------------------------------|-----------------|-----------------|-----------------|
| No. of IV days in previous 12 months                           |                 |                 |                 |
| n                                                              | 33              | 31              | 64              |
| Mean(SD)                                                       | 26.3(25.7)      | 26(22.1)        | 26.2(23.8)      |
| Median(IQR)                                                    | 17(7,44)        | 28(0,44)        | 17(7,44)        |
| Min,Max                                                        | (0,117)         | (0,70)          | (0,117)         |
| No. of participants requiring IV days<br>in previous 12 months |                 |                 |                 |
| At least 1 IV day                                              | 26(78.8%)       | 23(74.2%)       | 49(76.6%)       |
| Days since last IV start date                                  |                 |                 |                 |
| n                                                              | 31              | 28              | 59              |
| Mean(SD)                                                       | 168.7(245.2)    | 202.3(325.2)    | 184.6(283.9)    |
| Median(IQR)                                                    | 75(45,194)      | 100(24.5,219.5) | 91(39,213)      |
| Min,Max                                                        | (6,1085)        | (7,1575)        | (6,1575)        |
| FEV1                                                           |                 |                 |                 |
| n                                                              | 33              | 31              | 64              |
| Mean(SD)                                                       | 2(0.8)          | 2.3(1)          | 2.1(0.9)        |
| Median(IQR)                                                    | 1.9(1.4,2.4)    | 2.1(1.6,2.8)    | 1.9(1.5,2.7)    |
| Min,Max                                                        | (0.8,4)         | (0.6,5)         | (0.6,5)         |
| FEV1 % Predicted                                               |                 |                 |                 |
| n                                                              | 33              | 31              | 64              |
| Mean(SD)                                                       | 53.4(19.4)      | 61.4(22.7)      | 57.3(21.3)      |
| Median(IQR)                                                    | 49.2(39.4,61.9) | 53.4(43,80)     | 49.6(41.9,76.7) |
| Min,Max                                                        | (26,103)        | (23.2,100.7)    | (23.2,103)      |
| Clinician pseudomonas status                                   |                 |                 |                 |
| Negative                                                       | 15(45.5%)       | 8(26.7%)        | 23(36.5%)       |
| Intermittent                                                   | 3(9.1%)         | 3(10%)          | 6(9.5%)         |
| Chronic                                                        | 15(45.5%)       | 19(63.3%)       | 34(54%)         |
| Leeds Criteria pseudomonas status                              |                 |                 |                 |
| Negative                                                       | 15(45.5%)       | 10(33.3%)       | 25(39.7%)       |
| Intermittent                                                   | 4(12.1%)        | 4(13.3%)        | 8(12.7%)        |
| Chronic                                                        | 14(42.4%)       | 16(53.3%)       | 30(47.6%)       |

## Subjective adherence

|                                            |              |              |              |
|--------------------------------------------|--------------|--------------|--------------|
| n                                          | 23           | 20           | 43           |
| Mean(SD)                                   | 65.6(40.1)   | 67.8(35.4)   | 66.6(37.6)   |
| Median(IQR)                                | 90(20,99)    | 80(45,99.5)  | 90(35,99)    |
| Min,Max                                    | (0,100)      | (0,100)      | (0,100)      |
| Simple normative adherence (first 2 weeks) |              |              |              |
| n                                          | 33           | 31           | 64           |
| Mean(SD)                                   | 0.5(0)       | 0.5(0)       | 0.5(0)       |
| Median(IQR)                                | 0.5(0.5,0.5) | 0.5(0.5,0.5) | 0.5(0.5,0.5) |
| Min,Max                                    | (0.5,0.5)    | (0.5,0.5)    | (0.5,0.5)    |
| Treatment Burden                           |              |              |              |
| Low                                        | 10(30.3%)    | 11(35.5%)    | 21(32.8%)    |
| Medium                                     | 16(48.5%)    | 12(38.7%)    | 28(43.8%)    |
| High                                       | 2(6.1%)      | 5(16.1%)     | 7(10.9%)     |

**Baseline outcome measures***Table 5: Baseline outcome measures by treatment arm*

|                | Intervention       | Control            | Overall            |
|----------------|--------------------|--------------------|--------------------|
| <b>EQ5D-5L</b> |                    |                    |                    |
| n              | 33                 | 31                 | 64                 |
| Mean(SD)       | 0.866(0.121)       | 0.822(0.151)       | 0.845(0.137)       |
| Median(IQR)    | 0.901(0.767,0.951) | 0.825(0.737,0.942) | 0.872(0.752,0.946) |
| Min,Max        | (0.53,1)           | (0.486,1)          | (0.486,1)          |
| <b>PAM-13</b>  |                    |                    |                    |
| n              | 33                 | 31                 | 64                 |
| Mean(SD)       | 60.4(11.2)         | 60(13.2)           | 60.2(12.1)         |
| Median(IQR)    | 60.6(53.2,67.8)    | 58.1(48.9,67.8)    | 60.6(51,67.8)      |
| Min,Max        | (36.8,84.8)        | (38.1,90.7)        | (36.8,90.7)        |
| <b>CHAOS</b>   |                    |                    |                    |
| n              | 33                 | 31                 | 64                 |
| Mean(SD)       | 9.8(3.4)           | 10.1(4)            | 10(3.7)            |
| Median(IQR)    | 10(8,11)           | 10(7,12)           | 10(8,11)           |
| Min,Max        | (4,18)             | (4,20)             | (4,20)             |
| <b>MAD-3</b>   |                    |                    |                    |
| n              | 32                 | 30                 | 62                 |
| Mean(SD)       | 9.8(3.3)           | 9(3.4)             | 9.4(3.4)           |

|    |             |           |           |            |
|----|-------------|-----------|-----------|------------|
| 1  |             |           |           |            |
| 2  |             |           |           |            |
| 3  | Median(IQR) | 9(8,12.5) | 9.5(6,11) | 9(8,12)    |
| 4  | Min,Max     | (3,15)    | (3,15)    | (3,15)     |
| 5  |             |           |           |            |
| 6  | SRBAI       |           |           |            |
| 7  |             |           |           |            |
| 8  | n           | 33        | 30        | 63         |
| 9  | Mean(SD)    | 11.5(4.9) | 10.2(5.6) | 10.9(5.2)  |
| 10 | Median(IQR) | 12(8,16)  | 9(4,14)   | 10(7,15)   |
| 11 | Min,Max     | (4,20)    | (4,20)    | (4,20)     |
| 12 |             |           |           |            |
| 13 | GAD-7       |           |           |            |
| 14 |             |           |           |            |
| 15 | n           | 33        | 31        | 64         |
| 16 | Mean(SD)    | 4.1(4.5)  | 3.8(3.6)  | 3.9(4)     |
| 17 | Median(IQR) | 3(0,5)    | 3(1,7)    | 3(0.5,5.5) |
| 18 | Min,Max     | (0,15)    | (0,11)    | (0,15)     |
| 19 |             |           |           |            |
| 20 | PHQ-8       |           |           |            |
| 21 |             |           |           |            |
| 22 | n           | 33        | 31        | 64         |
| 23 | Mean(SD)    | 7(4.9)    | 6.5(5.2)  | 6.8(5)     |
| 24 | Median(IQR) | 6(3,12)   | 6(3,8)    | 6(3,10.5)  |
| 25 | Min,Max     | (0,16)    | (0,18)    | (0,18)     |
| 26 |             |           |           |            |
| 27 |             |           |           |            |

Table 6: Baseline CFQR domains by treatment arm

|    | Intervention          | Control    | Overall    |
|----|-----------------------|------------|------------|
| 30 |                       |            |            |
| 31 | Physical Functioning  |            |            |
| 32 |                       |            |            |
| 33 | n                     | 33         | 31         |
| 34 | Mean(SD)              | 48.5(34.8) | 49.2(30.8) |
| 35 | Median(IQR)           | 38(25,88)  | 42(17,83)  |
| 36 | Min,Max               | (0,100)    | (0,100)    |
| 37 |                       |            |            |
| 38 | Emotional Functioning |            |            |
| 39 |                       |            |            |
| 40 | n                     | 33         | 31         |
| 41 | Mean(SD)              | 70.2(21.1) | 62.3(26.1) |
| 42 | Median(IQR)           | 67(53,93)  | 67(40,80)  |
| 43 | Min,Max               | (27,100)   | (7,100)    |
| 44 |                       |            |            |
| 45 | Eating                |            |            |
| 46 |                       |            |            |
| 47 | n                     | 33         | 31         |
| 48 | Mean(SD)              | 79.9(24.8) | 74.6(27.7) |
| 49 | Median(IQR)           | 89(67,100) | 78(56,100) |
| 50 | Min,Max               | (0,100)    | (0,100)    |
| 51 |                       |            |            |
| 52 | Social Functioning    |            |            |
| 53 |                       |            |            |
| 54 | n                     | 33         | 31         |
| 55 |                       |            |            |
| 56 |                       |            |            |
| 57 |                       |            |            |
| 58 |                       |            |            |
| 59 |                       |            |            |
| 60 |                       |            |            |

|    |                    |            |            |            |
|----|--------------------|------------|------------|------------|
| 1  |                    |            |            |            |
| 2  |                    |            |            |            |
| 3  | Mean(SD)           | 65(20.3)   | 59.6(26.2) | 62.4(23.3) |
| 4  | Median(IQR)        | 67(50,78)  | 61(44,83)  | 67(44,83)  |
| 5  | Min,Max            | (17,100)   | (11,100)   | (11,100)   |
| 6  |                    |            |            |            |
| 7  | Body Image         |            |            |            |
| 8  |                    |            |            |            |
| 9  | n                  | 33         | 31         | 64         |
| 10 | Mean(SD)           | 68.5(27.3) | 64.9(31.7) | 66.7(29.3) |
| 11 | Median(IQR)        | 78(56,89)  | 67(44,100) | 78(44,89)  |
| 12 | Min,Max            | (0,100)    | (0,100)    | (0,100)    |
| 13 |                    |            |            |            |
| 14 | Treatment Burden   |            |            |            |
| 15 |                    |            |            |            |
| 16 | n                  | 33         | 31         | 64         |
| 17 | Mean(SD)           | 50.5(16.5) | 51.6(25.9) | 51(21.4)   |
| 18 | Median(IQR)        | 44(44,67)  | 56(33,67)  | 50(44,67)  |
| 19 | Min,Max            | (11,78)    | (0,100)    | (0,100)    |
| 20 |                    |            |            |            |
| 21 | Respiratory        |            |            |            |
| 22 |                    |            |            |            |
| 23 | n                  | 33         | 31         | 64         |
| 24 | Mean(SD)           | 53.5(27.5) | 54(27.3)   | 53.7(27.2) |
| 25 | Median(IQR)        | 50(33,78)  | 56(33,78)  | 56(33,78)  |
| 26 | Min,Max            | (0,100)    | (6,100)    | (0,100)    |
| 27 |                    |            |            |            |
| 28 | Digestion          |            |            |            |
| 29 |                    |            |            |            |
| 30 | n                  | 33         | 31         | 64         |
| 31 | Mean(SD)           | 77.9(16.9) | 80.4(26.4) | 79.1(21.9) |
| 32 | Median(IQR)        | 78(67,89)  | 89(78,100) | 89(67,100) |
| 33 | Min,Max            | (44,100)   | (0,100)    | (0,100)    |
| 34 |                    |            |            |            |
| 35 | Role Functioning   |            |            |            |
| 36 |                    |            |            |            |
| 37 | n                  | 33         | 31         | 64         |
| 38 | Mean(SD)           | 65.2(24.3) | 64(25.9)   | 64.6(24.9) |
| 39 | Median(IQR)        | 67(50,83)  | 67(42,83)  | 67(50,83)  |
| 40 | Min,Max            | (0,100)    | (8,100)    | (0,100)    |
| 41 |                    |            |            |            |
| 42 | Vitality           |            |            |            |
| 43 |                    |            |            |            |
| 44 | n                  | 33         | 31         | 64         |
| 45 | Mean(SD)           | 37.8(22.8) | 40.6(22)   | 39.2(22.3) |
| 46 | Median(IQR)        | 33(17,50)  | 42(25,58)  | 42(25,58)  |
| 47 | Min,Max            | (8,92)     | (0,75)     | (0,92)     |
| 48 |                    |            |            |            |
| 49 | Health Perceptions |            |            |            |
| 50 |                    |            |            |            |
| 51 | n                  | 33         | 31         | 64         |
| 52 | Mean(SD)           | 47.8(27.7) | 51.6(24.9) | 49.6(26.3) |
| 53 | Median(IQR)        | 44(22,67)  | 56(33,67)  | 44(33,67)  |
| 54 |                    |            |            |            |
| 55 |                    |            |            |            |
| 56 |                    |            |            |            |
| 57 |                    |            |            |            |
| 58 |                    |            |            |            |
| 59 |                    |            |            |            |
| 60 |                    |            |            |            |

|             |             |            |              |
|-------------|-------------|------------|--------------|
| Min,Max     | (0,100)     | (0,100)    | (0,100)      |
| Weight      |             |            |              |
| n           | 33          | 31         | 64           |
| Mean(SD)    | 70.7(36.1)  | 63.4(39.8) | 67.2(37.9)   |
| Median(IQR) | 100(33,100) | 67(33,100) | 83.5(33,100) |
| Min,Max     | (0,100)     | (0,100)    | (0,100)      |

Table 7: Baseline COM-BMQ domains by treatment arm

|                            | Intervention | Control      | Overall      |
|----------------------------|--------------|--------------|--------------|
| <b>COM BMQ Necessities</b> |              |              |              |
| n                          | 33           | 31           | 64           |
| Mean(SD)                   | 3.2(0.7)     | 3.4(0.8)     | 3.3(0.8)     |
| Median(IQR)                | 3.1(2.7,3.7) | 3.3(2.9,4.1) | 3.1(2.7,4)   |
| Min,Max                    | (2,4.9)      | (2,4.7)      | (2,4.9)      |
| <b>COM BMQ Concerns</b>    |              |              |              |
| n                          | 33           | 31           | 64           |
| Mean(SD)                   | 2.1(0.6)     | 2.2(0.6)     | 2.1(0.6)     |
| Median(IQR)                | 2.1(1.5,2.6) | 2.1(1.7,2.6) | 2.1(1.6,2.6) |
| Min,Max                    | (1.2,3.4)    | (1.1,3.3)    | (1.1,3.4)    |

### Primary Analysis

- In total, there were 79 exacerbations in participants followed up for at least 6 months
- Of these, 60 exacerbations fitted our criteria to be included in the primary analysis
  - 18 were not treated with IV antibiotics
  - 1 did not meet any Fuchs criteria
- A total of 60 participants had at least 6 months of exacerbation data (Intervention=32, Control =28)
- 4 participants were excluded
  - 2 died (Control=2)
  - 1 withdrew consent (Control=1)
  - 1 lost to follow up before 6 months (Intervention=1)
- 35 exacerbations occurred in Intervention participants, 25 occurred in Control participants
- 33 participants experienced at least 1 exacerbation (Intervention= 19 (60%), Control= 14 (50%))

The most frequently reported Fuchs criteria (Table 9) were 'Increased cough' (n=52) and 'Change in sputum (n=48). The median number of Fuchs criteria reported per exacerbation included in the primary analysis was 4 (IQR=4,6).

The median IV course length of exacerbations included in the primary analysis was 14 days in both the intervention and usual care arm (Table 12).

1  
2  
3 As ACtiF was a pilot study, it was not powered to detect an intervention effect. However,  
4 differences between treatment arms and their 95% confidence intervals have been calculated  
5 (Table 13). The median number of exacerbations was 1 in the intervention arm and 0.5 in the  
6 usual care arm. Following adjustment for site and the number of IV days in the previous year,  
7 adjusted IRR was 1.12 (95% CI: 0.658-1.94). This demonstrates a small increase in  
8 exacerbations in the intervention arm, however the confidence intervals are relatively wide. The  
9 IRR from the offset model shows an IRR of 0.958 (95% CI: 0.615,1.5). Here, a small decrease in  
10 exacerbations can be observed. As with the previous model, the confidence interval is relatively  
11 wide.  
12  
13  
14  
15  
16  
17  
18  
19  
20  
21  
22  
23  
24  
25  
26  
27  
28  
29  
30  
31  
32  
33  
34  
35  
36  
37  
38  
39  
40  
41  
42  
43  
44  
45  
46  
47  
48  
49  
50  
51  
52  
53  
54  
55  
56  
57  
58  
59  
60

Exacerbations summary

Number of Exacerbations

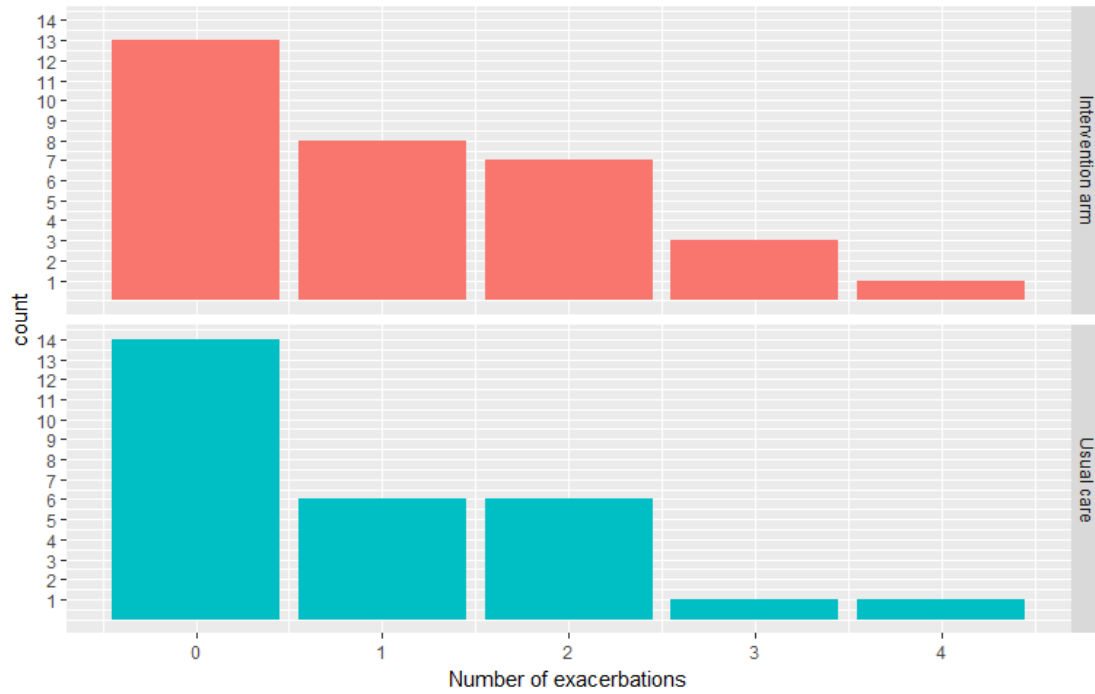

Figure 2: The number of exacerbations in participants by treatment arm in 6 months [n=60]

### Fuchs Criteria

Table 8: The number of each Fuchs criterion in the exacerbations used as the primary outcome

|                                                                                                                                | n (%) for exacerbations in 6 months after consent and meeting our criteria (primary outcome) | n (%) for exacerbations treated with IV antibiotics and met at least one Fuchs criteria | n (%) for any exacerbation during the study |
|--------------------------------------------------------------------------------------------------------------------------------|----------------------------------------------------------------------------------------------|-----------------------------------------------------------------------------------------|---------------------------------------------|
| <b>Change in sputum</b>                                                                                                        | 48 ( 80 %)                                                                                   | 63 ( 77.8 %)                                                                            | 69 ( 69 %)                                  |
| <b>New or increased hemoptysis</b>                                                                                             | 12 ( 20 %)                                                                                   | 15 ( 18.5 %)                                                                            | 16 ( 16 %)                                  |
| <b>Increased cough</b>                                                                                                         | 52 ( 86.7 %)                                                                                 | 70 ( 86.4 %)                                                                            | 77 ( 77 %)                                  |
| <b>Increased dyspnea</b>                                                                                                       | 43 ( 71.7 %)                                                                                 | 56 ( 69.1 %)                                                                            | 61 ( 61 %)                                  |
| <b>Malaise, fatigue, or lethargy</b>                                                                                           | 48 ( 80 %)                                                                                   | 66 ( 81.5 %)                                                                            | 69 ( 69 %)                                  |
| <b>Temperature above 38 °C</b>                                                                                                 | 13 ( 21.7 %)                                                                                 | 18 ( 22.2 %)                                                                            | 20 ( 20 %)                                  |
| <b>Anorexia or weight loss</b>                                                                                                 | 20 ( 33.3 %)                                                                                 | 30 ( 37 %)                                                                              | 31 ( 31 %)                                  |
| <b>Sinus pain or tenderness</b>                                                                                                | 13 ( 21.7 %)                                                                                 | 19 ( 23.5 %)                                                                            | 21 ( 21 %)                                  |
| <b>Change in sinus discharge</b>                                                                                               | 13 ( 21.7 %)                                                                                 | 21 ( 25.9 %)                                                                            | 22 ( 22 %)                                  |
| <b>Change in physical examination of the chest, derived from notes by site staff.</b>                                          | 9 ( 15 %)                                                                                    | 12 ( 14.8 %)                                                                            | 13 ( 13 %)                                  |
| <b>Decrease in pulmonary function by 10 percent or more from a previously recorded value, derived from notes by site staff</b> | 12 ( 20 %)                                                                                   | 17 ( 21 %)                                                                              | 19 ( 19 %)                                  |
| <b>Radiographic changes indicative of pulmonary infection, derived from notes by site staff)</b>                               | 2 ( 3.3 %)                                                                                   | 2 ( 2.5 %)                                                                              | 2 ( 2 %)                                    |



Table 9: Summary of Fuchs criteria for the exacerbations that were included in the primary outcome (IV days and at least 1 Fuchs criteria in 6 month follow up period)

| Description                                            |              |
|--------------------------------------------------------|--------------|
| Exacerbations included in primary analysis             |              |
| n (%) with IV and at least 1 Fuchs                     | 60 ( 60 %)   |
| Mean (SD) number of Fuchs criteria                     | 4.8 ( 2.1 )  |
| Median (IQR) number of Fuchs criteria                  | 4 ( 4 , 6 )  |
| Min, max number of Fuchs criteria                      | (1,10)       |
| n (%) of exacerbations with at least 2 Fuchs criteria  | 58 ( 96.7 %) |
| n (%) of exacerbations with at least 3 Fuchs criteria  | 48 ( 80 %)   |
| n (%) of exacerbations with at least 4 Fuchs criteria  | 46 ( 76.7 %) |
| n (%) of exacerbations with at least 5 Fuchs criteria  | 29 ( 48.3 %) |
| n (%) of exacerbations with at least 6 Fuchs criteria  | 20 ( 33.3 %) |
| n (%) of exacerbations with at least 7 Fuchs criteria  | 12 ( 20 %)   |
| n (%) of exacerbations with at least 8 Fuchs criteria  | 8 ( 13.3 %)  |
| n (%) of exacerbations with at least 9 Fuchs criteria  | 3 ( 5 %)     |
| n (%) of exacerbations with at least 10 Fuchs criteria | 1 ( 1.7 %)   |

Table 10: Summary of the exacerbations in the 6 month follow up period that were not included in the primary outcome (IV days and at least 1 Fuchs criteria) and the reasons for exclusion

| Exacerbations in 6 months not meeting criteria for primary outcome |            |
|--------------------------------------------------------------------|------------|
| Total exacerbations excluded                                       | 19 ( 24 %) |
| n (%) with IV days but no Fuchs criteria met                       | 1 ( 1 %)   |
| n (%) with no IV but at least 1 Fuchs                              | 7 ( 8 %)   |
| n (%) no IV days or Fuchs recorded (missing values)                | 11 ( 14 %) |

**Length of IV course**

*Table 11: Summary of IV length by exacerbation and participant*

|                                                        | Intervention | Usual Care |
|--------------------------------------------------------|--------------|------------|
| IV days per exacerbation in 6 months                   |              |            |
| n                                                      | 35           | 25         |
| Mean (SD)                                              | 13.6(4.2)    | 13.7(3.3)  |
| Median (IQR)                                           | 14(13,14)    | 14(13,15)  |
| Min, Max                                               | (2,30)       | (7,21)     |
| IV days per participant with exacerbations in 6 months |              |            |
| n                                                      | 19           | 14         |
| Mean (SD)                                              | 13.4(2.7)    | 13.6(3.2)  |
| Median (IQR)                                           | 14(11,14)    | 14(13,15)  |
| Min, Max                                               | (9,21.7)     | (8,20)     |
| IV days per exacerbation in whole study                |              |            |
| n                                                      | 45           | 36         |
| Mean (SD)                                              | 13.7(4.1)    | 13.9(3.1)  |
| Median (IQR)                                           | 14(13,14)    | 14(13,15)  |
| Min, Max                                               | (2,30)       | (7,21)     |

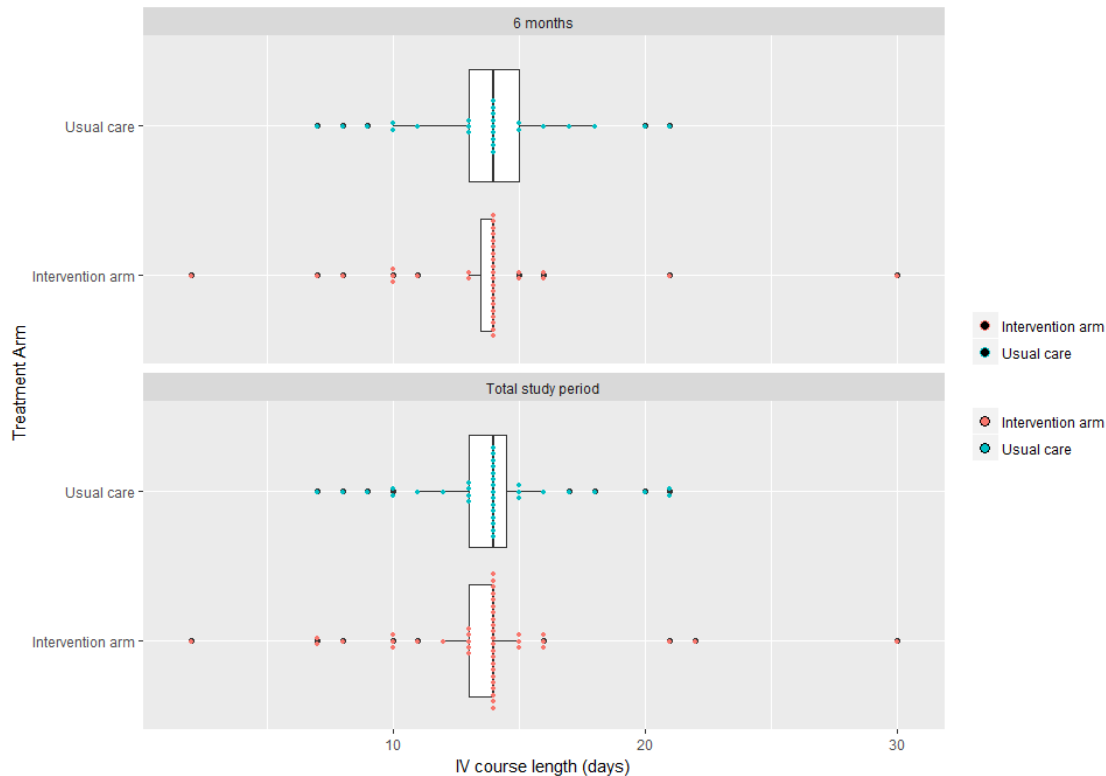

*Figure 3: The length on IV courses by treatment arm*

1  
2  
3  
4  
5  
6  
7  
8  
9  
10  
11  
12  
13  
14  
15  
16  
17  
18  
19  
20  
21  
22  
23  
24  
25  
26  
27  
28  
29  
30  
31  
32  
33  
34  
35  
36  
37  
38  
39  
40  
41  
42  
43  
44  
45  
46  
47

**Analysis models**

**6 month model**

*Table 12: Analysis of the primary clinical outcome, the number of exacerbations treated with IV antibiotics with at least 1 Fuchs criteria in a 6 month period adjusted for site and the number of IV days in the previous year.*

|            | Intervention n | Mean (SD)   | Median (IQR) | Control n | Mean (SD)   | Median (IQR)  | IRR  | 95% CI       |
|------------|----------------|-------------|--------------|-----------|-------------|---------------|------|--------------|
| Unadjusted | 32             | 1.1 ( 1.1 ) | 1 ( 0 , 2 )  | 28        | 0.9 ( 1.1 ) | 0.5 ( 0 , 2 ) | 1.22 | (0.686,2.21) |
| Adjusted   |                |             |              |           |             |               | 1.12 | (0.658,1.94) |

**Offset model**

*Table 13: A sensitivity analysis using all exacerbations treated with IV antibiotics with at least 1 Fuchs criteria that occurred during the study with the number of days of data collection included as an offset in the model. Adjusted for site and number of IV days in the previous year*

|                               | Intervention n | Total exacerbations (min,max) | Mean (SD) days followed up | Mean (SD) exacerbations per month | Control n | Total exacerbations (min,max) | Mean (SD) days followed up | Mean (SD) exacerbations per month | IRR   | 95% CI       |
|-------------------------------|----------------|-------------------------------|----------------------------|-----------------------------------|-----------|-------------------------------|----------------------------|-----------------------------------|-------|--------------|
| <b>Adjusted, Offset model</b> | 33             | 46(0,5)                       | 263.2(47.2 )               | 0.17(0.16)                        | 31        | 40(0,5)                       | 250.5(74.8 )               | 0.2(0.28)                         | 0.958 | (0.615,1.5 ) |

## Secondary analysis

Tables 15-16 show the results of the secondary analyses. As this is a pilot study, we have not powered to detect any effect. Key results are described below.

- Adjusted mean difference of 5% (95% CI: -2-12%) in FEV % predicted. This is an encouraging difference in the intervention arm.
- No notable differences in any of the other secondary outcomes but this is not of great concern as it is a pilot study.
- Fewer participants had BMI recorded than other outcomes (Intervention=18, Control=15).
- Small reduction in BMQ Concerns score in intervention arm (Mean difference=-0.21, 95% CI: -0.38,-0.048).

Figure 4 shows the distribution of the secondary outcome measures at baseline and follow up by treatment arm.

Table 14: Results of secondary effectiveness analysis

|                       | n<br>Intervention | Median (IQR)      | Mean<br>(SD) | n<br>Control | Median (IQR)      | Mean<br>(SD) | Mean<br>Diff | 95% CI             |
|-----------------------|-------------------|-------------------|--------------|--------------|-------------------|--------------|--------------|--------------------|
| FEV1<br>Unadjusted    | 30                | 1.8(1.17,2.83)    | 2(0.9)       | 27           | 1.9(1.46,2.83)    | 2.2(1)       | -0.21        | (-0.73,0.3)        |
| FEV1 Adjusted         |                   |                   |              |              |                   |              | 0.22         | (-0.062,0.51)      |
| FEV1 %<br>Unadjusted  | 30                | 51.8(33.46,71.26) | 54.2(21.1)   | 27           | 50.9(42.49,77.97) | 59(23.9)     | -4.8         | (-17,7.1)          |
| FEV1 %<br>Adjusted    |                   |                   |              |              |                   |              | 5            | (-2,12)            |
| BMI Unadjusted        | 18                | 20.5(19.5,26)     | 22.1(4.2)    | 15           | 23.4(20.7,26.2)   | 23.8(3.5)    | -1.7         | (-4.5,1.1)         |
| BMI Adjusted          |                   |                   |              |              |                   |              | -0.08        | (-1,0.89)          |
| EQ5D-5L<br>Unadjusted | 31                | 0.9(0.76,0.95)    | 0.9(0.2)     | 27           | 0.9(0.77,1)       | 0.9(0.2)     | -<br>0.00062 | (-<br>0.084,0.083) |
| EQ5D-5L<br>Adjusted   |                   |                   |              |              |                   |              | -0.016       | (-<br>0.087,0.055) |

|    |                |    |               |            |    |               |           |       |               |
|----|----------------|----|---------------|------------|----|---------------|-----------|-------|---------------|
| 1  |                |    |               |            |    |               |           |       |               |
| 2  |                |    |               |            |    |               |           |       |               |
| 3  | PAM-13         | 31 | 63.1(51,67.8) | 58.5(14.3) | 28 | 58.1(51,63.1) | 57.9(9.9) | 0.56  | (-5.9,7)      |
| 4  | Unadjusted     |    |               |            |    |               |           |       |               |
| 5  | PAM-13         |    |               |            |    |               |           | 0.046 | (-5.8,5.9)    |
| 6  | Adjusted       |    |               |            |    |               |           |       |               |
| 7  |                |    |               |            |    |               |           |       |               |
| 8  | CHAOS          | 31 | 9(7,13)       | 9.9(3.9)   | 28 | 9(7.5,11.5)   | 9.4(3.3)  | 0.55  | (-1.4,2.4)    |
| 9  | Unadjusted     |    |               |            |    |               |           |       |               |
| 10 | CHAOS          |    |               |            |    |               |           | 0.79  | (-0.47,2.1)   |
| 11 | Adjusted       |    |               |            |    |               |           |       |               |
| 12 |                |    |               |            |    |               |           |       |               |
| 13 | MAD-3          | 31 | 12(9,13)      | 10.8(3.9)  | 26 | 9.5(7,13)     | 9.4(3.6)  | 1.4   | (-0.58,3.4)   |
| 14 | Unadjusted     |    |               |            |    |               |           |       |               |
| 15 | MAD-3          |    |               |            |    |               |           | 0.82  | (-0.51,2.1)   |
| 16 | Adjusted       |    |               |            |    |               |           |       |               |
| 17 |                |    |               |            |    |               |           |       |               |
| 18 | SRBAI          | 31 | 13(8,16)      | 12.1(5.3)  | 28 | 10.5(6,15.5)  | 10.6(5)   | 1.4   | (-1.3,4.1)    |
| 19 | Unadjusted     |    |               |            |    |               |           |       |               |
| 20 | SRBAI Adjusted |    |               |            |    |               |           | 0.15  | (-1.8,2.1)    |
| 21 |                |    |               |            |    |               |           |       |               |
| 22 | GAD-7          | 31 | 3(1,6)        | 4.1(4.1)   | 28 | 2.5(0,7)      | 4.2(4.4)  | -0.05 | (-2.3,2.2)    |
| 23 | Unadjusted     |    |               |            |    |               |           |       |               |
| 24 | GAD-7          |    |               |            |    |               |           | -0.31 | (-1.9,1.3)    |
| 25 | Adjusted       |    |               |            |    |               |           |       |               |
| 26 |                |    |               |            |    |               |           |       |               |
| 27 | PHQ-8          | 31 | 7(4,12)       | 7.3(5.2)   | 28 | 4(1.5,7)      | 5.3(5.1)  | 2     | (-0.68,4.7)   |
| 28 | Unadjusted     |    |               |            |    |               |           |       |               |
| 29 | PHQ-8          |    |               |            |    |               |           | 0.97  | (-0.96,2.9)   |
| 30 | Adjusted       |    |               |            |    |               |           |       |               |
| 31 |                |    |               |            |    |               |           |       |               |
| 32 | COM-BMQ        | 31 | 2(1.5,2.3)    | 1.9(0.5)   | 27 | 2.1(1.9,2.4)  | 2.1(0.5)  | -0.22 | (-0.48,0.026) |
| 33 | Concerns       |    |               |            |    |               |           |       |               |
| 34 | Unadjusted     |    |               |            |    |               |           |       |               |
| 35 | COM-BMQ        |    |               |            |    |               |           | -0.21 | (-0.38,-      |
| 36 | Concerns       |    |               |            |    |               |           |       | 0.048)        |
| 37 | Adjusted       |    |               |            |    |               |           |       |               |
| 38 |                |    |               |            |    |               |           |       |               |
| 39 | COM BMQ        | 31 | 3.4(3,4)      | 3.5(0.6)   | 27 | 3.4(2.9,4)    | 3.5(0.7)  | 0.011 | (-0.35,0.37)  |
| 40 | Necessities    |    |               |            |    |               |           |       |               |
| 41 | Unadjusted     |    |               |            |    |               |           |       |               |
| 42 |                |    |               |            |    |               |           |       |               |
| 43 |                |    |               |            |    |               |           |       |               |
| 44 |                |    |               |            |    |               |           |       |               |
| 45 |                |    |               |            |    |               |           |       |               |
| 46 |                |    |               |            |    |               |           |       |               |
| 47 |                |    |               |            |    |               |           |       |               |

COM BMQ  
Necessities  
Adjusted

0.12 (-0.16,0.4)

Table 15: Results of secondary effectiveness analysis

|                                      | n<br>Intervention | Median<br>(IQR) | Mean<br>(SD) | n<br>Control | Median<br>(IQR) | Mean<br>(SD) | Mean<br>Diff | 95% CI     |
|--------------------------------------|-------------------|-----------------|--------------|--------------|-----------------|--------------|--------------|------------|
| CFQ-R Physical<br>Unadjusted         | 31                | 54(25,88)       | 54.4(31.6)   | 28           | 62.5(33,92)     | 60.9(31.2)   | -6.4         | (-23,10)   |
| CFQ-R Physical<br>Adjusted           |                   |                 |              |              |                 |              | -2.6         | (-13,7.4)  |
| CFQ-R Emotional State<br>Unadjusted  | 31                | 67(53,93)       | 68.3(23.4)   | 28           | 73(56.5,90)     | 72.3(22.7)   | -4           | (-16,8)    |
| CFQ-R Emotional State<br>Adjusted    |                   |                 |              |              |                 |              | -7.7         | (-16,0.55) |
| CFQ-R Eating<br>Unadjusted           | 31                | 89(67,100)      | 80.7(21.6)   | 28           | 83.5(67,100)    | 79.9(20.7)   | 0.85         | (-10,12)   |
| CFQ-R Eating<br>Adjusted             |                   |                 |              |              |                 |              | 1.1          | (-6.5,8.7) |
| CFQ-R Social<br>Unadjusted           | 31                | 67(56,78)       | 65.4(15.8)   | 28           | 64(50,83)       | 66.4(20.9)   | -1           | (-11,8.6)  |
| CFQ-R Social<br>Adjusted             |                   |                 |              |              |                 |              | -3.7         | (-10,2.8)  |
| CFQ-R Body Image<br>Unadjusted       | 31                | 78(67,89)       | 73.3(23.8)   | 28           | 78(56,100)      | 73.1(25.5)   | 0.19         | (-13,13)   |
| CFQ-R Body Image<br>Adjusted         |                   |                 |              |              |                 |              | 0.62         | (-7.2,8.5) |
| CFQ-R Treatment Burden<br>Unadjusted | 31                | 56(44,67)       | 56.5(16.6)   | 28           | 56(44,67)       | 57.3(19.9)   | -0.83        | (-10,8.7)  |
| CFQ-R Treatment Burden<br>Adjusted   |                   |                 |              |              |                 |              | 1.2          | (-6.4,8.8) |
| CFQ-R Respiratory<br>Unadjusted      | 31                | 67(44,78)       | 59.5(25.2)   | 27           | 67(50,83)       | 65.6(22.7)   | -6.1         | (-19,6.6)  |
| CFQ-R Respiratory<br>Adjusted        |                   |                 |              |              |                 |              | -4.4         | (-14,4.8)  |

1  
2  
3  
4  
5  
6  
7  
8  
9  
10  
11  
12  
13  
14  
15  
16  
17  
18  
19  
20  
21  
22  
23  
24  
25  
26  
27  
28  
29  
30  
31  
32  
33  
34  
35  
36  
37  
38  
39  
40  
41  
42  
43  
44  
45  
46  
47

|                            |    |            |            |    |               |            |      |            |
|----------------------------|----|------------|------------|----|---------------|------------|------|------------|
| CFQ-R Digestion Unadjusted | 31 | 89(67,100) | 81.1(18.4) | 27 | 89(78,100)    | 84.4(23.5) | -3.3 | (-14,7.7)  |
| CFQ-R Digestion Adjusted   |    |            |            |    |               |            | -2.3 | (-11,6.2)  |
| CFQ-R Role Unadjusted      | 31 | 75(33,83)  | 64.8(26.1) | 27 | 75(56,92)     | 70.3(21.5) | -5.6 | (-18,7.1)  |
| CFQ-R Role Adjusted        |    |            |            |    |               |            | -8.2 | (-17,0.4)  |
| CFQ-R Vital Unadjusted     | 31 | 42(25,42)  | 38.5(19.5) | 28 | 50(33,62.5)   | 48.7(23)   | -10  | (-21,0.81) |
| CFQ-R Vital Adjusted       |    |            |            |    |               |            | -7   | (-15,0.99) |
| CFQ-R Health Unadjusted    | 31 | 44(22,67)  | 45.5(25.4) | 28 | 61.5(33,72.5) | 56.8(27.6) | -11  | (-25,2.6)  |
| CFQ-R Health Adjusted      |    |            |            |    |               |            | -6.5 | (-16,2.8)  |
| CFQ-R Weight Unadjusted    | 31 | 89(67,100) | 81.1(18.4) | 27 | 89(78,100)    | 84.4(23.5) | -3.3 | (-14,7.7)  |
| CFQ-R Weight Adjusted      |    |            |            |    |               |            | -2.3 | (-11,6.2)  |

For peer review only

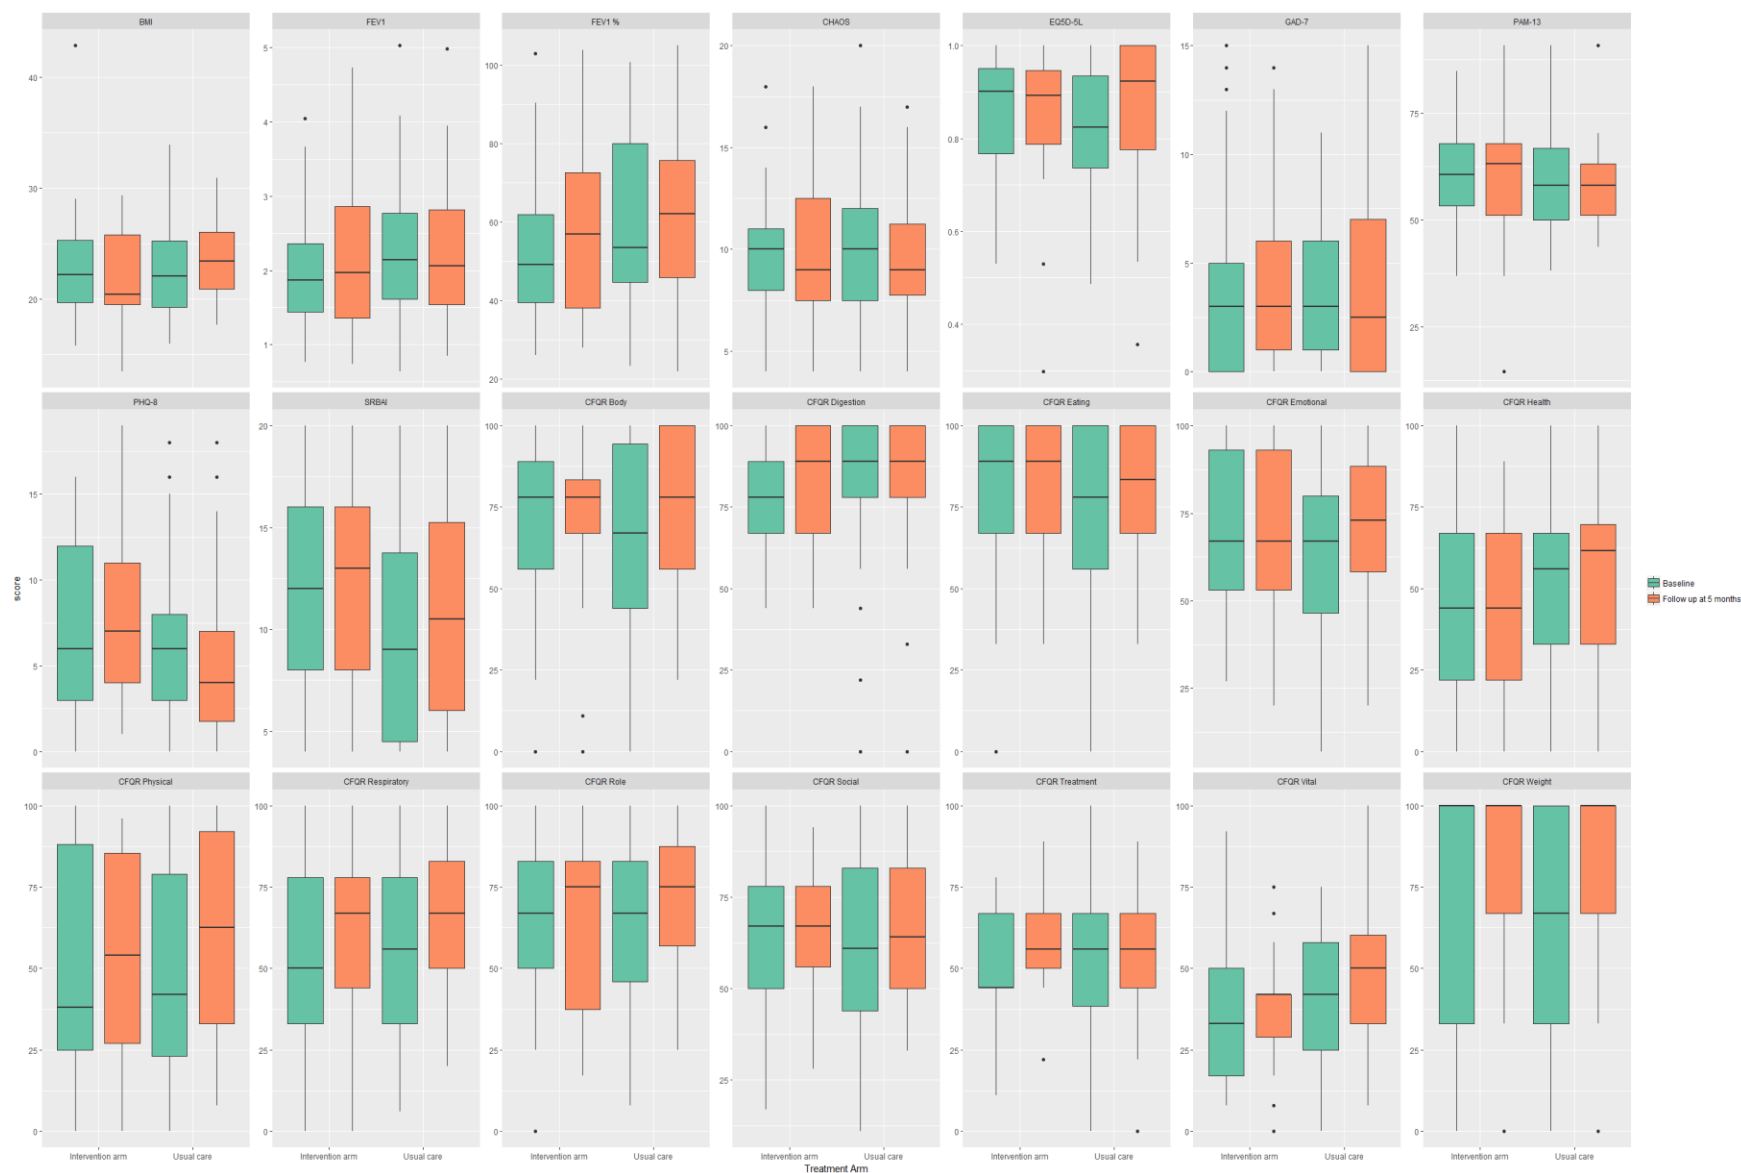

Figure 4: Box plots showing the distribution of secondary outcomes by treatment arm



1  
2  
3  
4  
5  
6  
7  
8  
9  
10  
11  
12  
13  
14  
15  
16  
17  
18  
19  
20  
21  
22  
23  
24  
25  
26  
27  
28  
29  
30  
31  
32  
33  
34  
35  
36  
37  
38  
39  
40  
41  
42  
43  
44  
45  
46  
47

For peer review only

## Adherence to CF medication

During the trial, 8 participants withdrew from adherence data collection (Intervention=4, Control=4). An exact date of withdrawal was not recorded but could be seen from inhalation data (last non zero number of daily inhalations). This has been improved for the main trial and date of adherence data collection withdrawal will be recorded.

Participants who withdrew from adherence data collection were removed from summaries of adherence for 6 months as they did not have 6 months' worth of data. Where possible, inhalation data collected before withdrawal was included in the mean adherence by arm in the monthly table and the plot by week. The number included in each of these estimates can be seen in Table 18.

Table 17 shows the mean adherence by treatment arm for the 6 months post randomisation. Adherence is greater in the intervention arm for each of the different adherence measures. A difference of 10% (95% CI: -5.2 to 25.2) in simple normative adherence with numerator adjustment can be observed in the intervention arm. Table 18 shows the difference in simple normative adherence with numerator adjustment by treatment arm for each individual month in the study. Adherence is greater in the Intervention arm in month 1 (mean difference=2.6, 95% CI: -13.5,18.6). Following month 1, adherence is consistently higher in the intervention arm with the greatest difference observed in month 5 (mean difference: 13%, 95% CI: -4.8, 30.8). These differences would indicate a potentially clinically important difference between the intervention and usual care arms.

The difference in adherence has been presented by weeks post randomisation in Figure 5. There is a difference in numerator adjusted normative adherence with greater adherence observed in the intervention arm. This difference becomes clear after week 4 which coincides with use of the intervention around week 2-3.

*Table 16: Summary of average adherences in 6 months following consent by intervention arm and the difference in means with 95% confidence intervals*

|                          | n<br>Intervention | Mean<br>Intervention | n<br>Control | Mean<br>Control | Mean Difference (95%<br>CI) |
|--------------------------|-------------------|----------------------|--------------|-----------------|-----------------------------|
| Baseline (first 2 weeks) | 29                | 25.9(31.4)           | 26           | 23.2(29)        | 2.6(-13.9,19.2)             |
| Total doses              | 29                | 222.4(233.1)         | 26           | 245.7(238.6)    | -23.3(-151.2,104.6)         |
| Unadjusted adherence     | 29                | 47.7(33.8)           | 26           | 37.7(27.1)      | 10(-6.5,26.4)               |
| Simple normative         | 29                | 45.5(32.8)           | 26           | 34.7(27)        | 10.8(-5.4,27)               |

|                                                   |    |            |    |            |                |
|---------------------------------------------------|----|------------|----|------------|----------------|
| Sophisticated normative                           | 29 | 41.6(33.4) | 26 | 34.2(27.1) | 7.5(-8.9,23.9) |
| Simple normative with numerator adjustment        | 29 | 43.6(30.4) | 26 | 33.6(25.9) | 10(-5.2,25.2)  |
| Sophisticated normative with numerator adjustment | 29 | 39.9(30.9) | 26 | 33.2(25.9) | 6.8(-8.6,22.2) |

Table 17: Summary of average adherences in each month from following consent from 1 to 6 months by intervention arm

|         | n Intervention | Mean Intervention | n Control | Mean Control | Mean Difference (95% CI) |
|---------|----------------|-------------------|-----------|--------------|--------------------------|
| Month 1 | 32             | 29.7(34.5)        | 28        | 27.2(27.5)   | 2.6(-13.5,18.6)          |
| Month 2 | 31             | 42.1(33.1)        | 28        | 33.7(31.5)   | 8.4(-8.5,25.2)           |
| Month 3 | 30             | 42.3(33.7)        | 28        | 33.3(34.8)   | 9(-9,27.1)               |
| Month 4 | 29             | 42.7(34.7)        | 27        | 34.5(30.5)   | 8.2(-9.3,25.7)           |
| Month 5 | 29             | 42.8(36.2)        | 27        | 29.8(30.1)   | 13(-4.8,30.8)            |
| Month 6 | 29             | 41.3(36.5)        | 27        | 32.9(28.5)   | 8.4(-9.1,25.9)           |

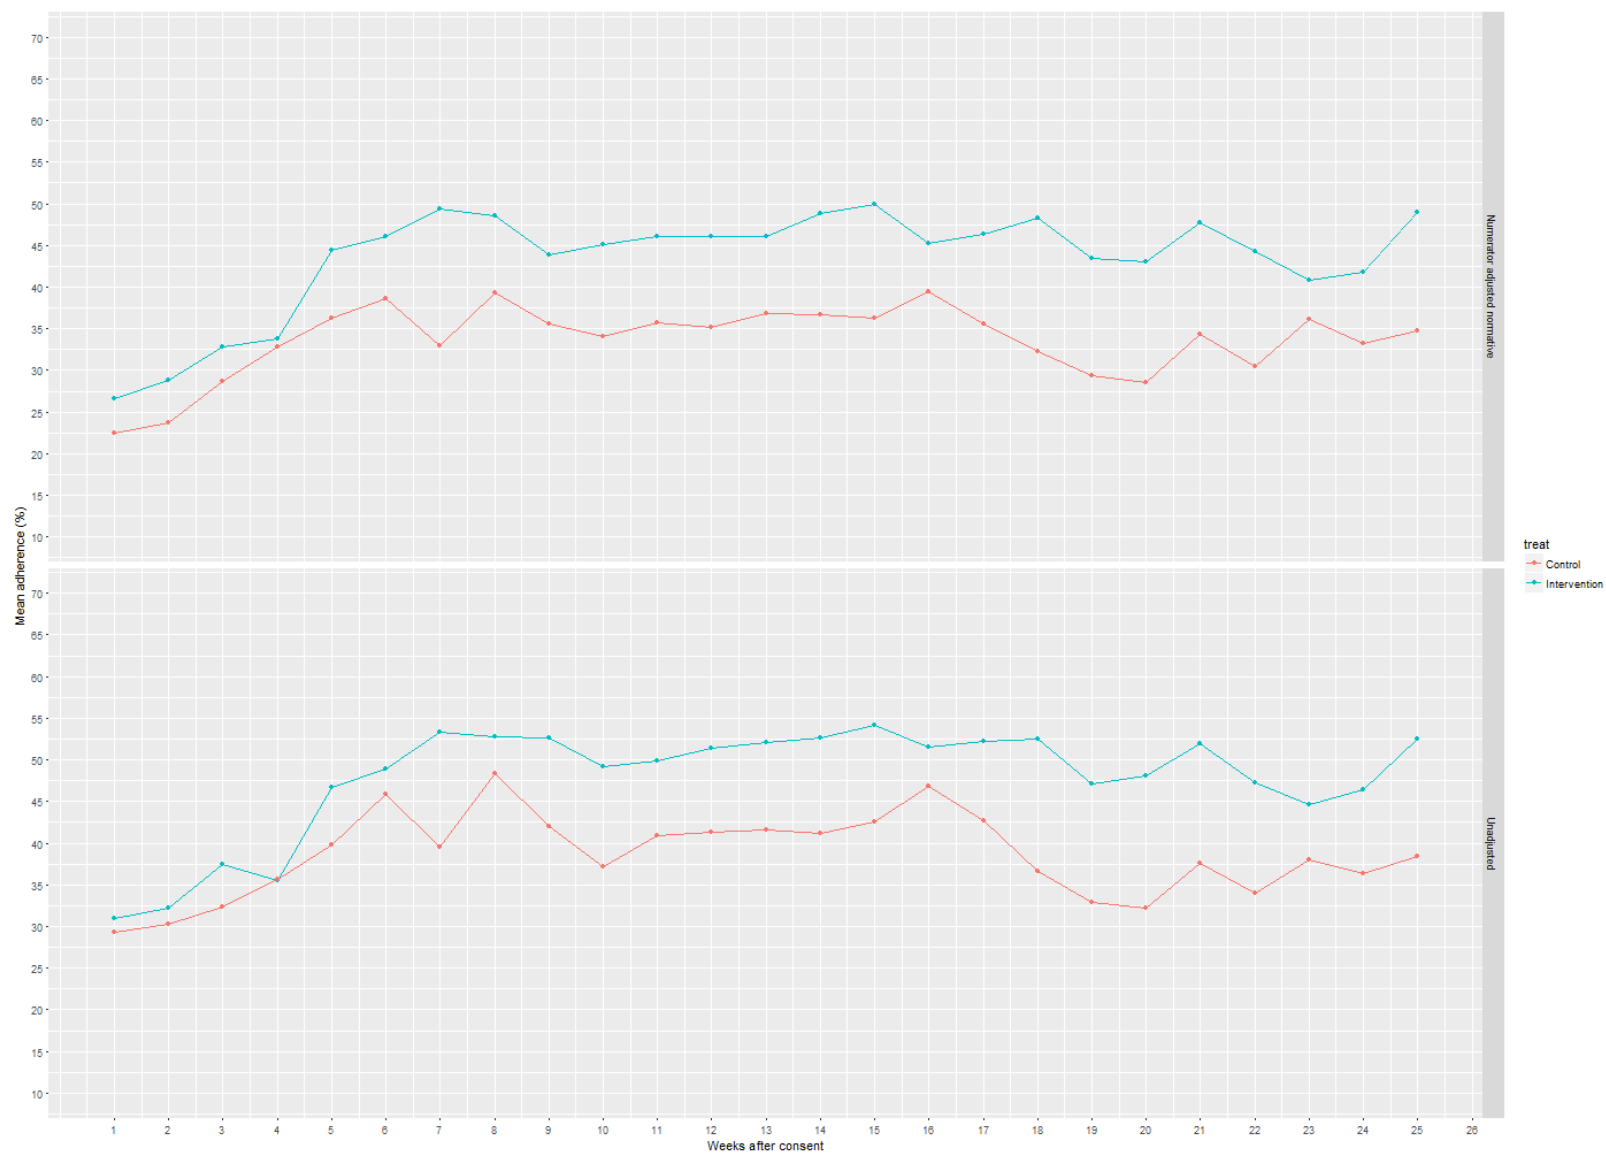

Figure 5: Mean weekly adherence by treatment arm

1  
2  
3  
4  
5  
6  
7  
8  
9  
10  
11  
12  
13  
14  
15  
16  
17  
18  
19  
20  
21  
22  
23  
24  
25  
26  
27  
28  
29  
30  
31  
32  
33  
34  
35  
36  
37  
38  
39  
40  
41  
42  
43  
44  
45  
46  
47

For peer review only

### Intervention adherence (Participants)

Table 19 shows the median number of CFHH interactions was 3 (IQR: 1-8). 3 participants had no interactions with CFHH and the maximum number of interactions was 44. The mean total duration of interaction time across the study was 49.3 (SD= 44.8) minutes. The mean length of an interaction by participant was 12.4 (SD=9.6) minutes and the mean length of all interactions was 6.6 (SD=11) minutes. The median number of days in the trial with interactions was 2 (IQR=1,7) by participant. Figure 6 shows the wide range of values across participants, particularly for the total duration of interactions.

Figure 7 shows when interactions occurred in days for each participant. Some participants were interacting fairly regularly, however most participants were inconsistent with their interactions. Figure 8 shows that the 'How am I doing?' pages were the most frequently visited in terms of the total number of clicks during the trial. 30 (90.9%) of participants visited the 'How am I doing?', 'Treatment' and 'Videos' page at least once (Table 20). 224 (91.4%) sessions included a visit to the 'How am I doing?' page.

Table 18: Summary of clicks in CFHH. An interaction is defined as a series of clicks with no greater than a 15 minute lag between clicks

|                                               |              |
|-----------------------------------------------|--------------|
| Interactions with CFHH by participant         |              |
| n                                             | 33           |
| Mean (SD)                                     | 7.4(11.6)    |
| Median (IQR)                                  | 3(1,8)       |
| Min, Max                                      | (0,44)       |
| Total duration of interactions by participant |              |
| n                                             | 33           |
| Mean (SD)                                     | 49.3(44.8)   |
| Median (IQR)                                  | 38(26,55)    |
| Min, Max                                      | (0,177)      |
| Mean duration of interactions by participant  |              |
| n                                             | 33           |
| Mean (SD)                                     | 12.4(9.6)    |
| Median (IQR)                                  | 10.7(4.3,19) |
| Min, Max                                      | (0,37)       |
| Days with interactions by participant         |              |
| n                                             | 33           |
| Mean (SD)                                     | 5.7(8.2)     |
| Median (IQR)                                  | 2(1,7)       |
| Min, Max                                      | (0,32)       |
| Duration of interactions                      |              |
| n                                             | 245          |
| Mean (SD)                                     | 6.6(11)      |
| Median (IQR)                                  | 1(0,8)       |
| Min, Max                                      | (0,57)       |

1  
2  
3  
4  
5  
6  
7  
8  
9  
10  
11  
12  
13  
14  
15  
16  
17  
18  
19  
20  
21  
22  
23  
24  
25  
26  
27  
28  
29  
30  
31  
32  
33  
34  
35  
36  
37  
38  
39  
40  
41  
42  
43  
44  
45  
46  
47

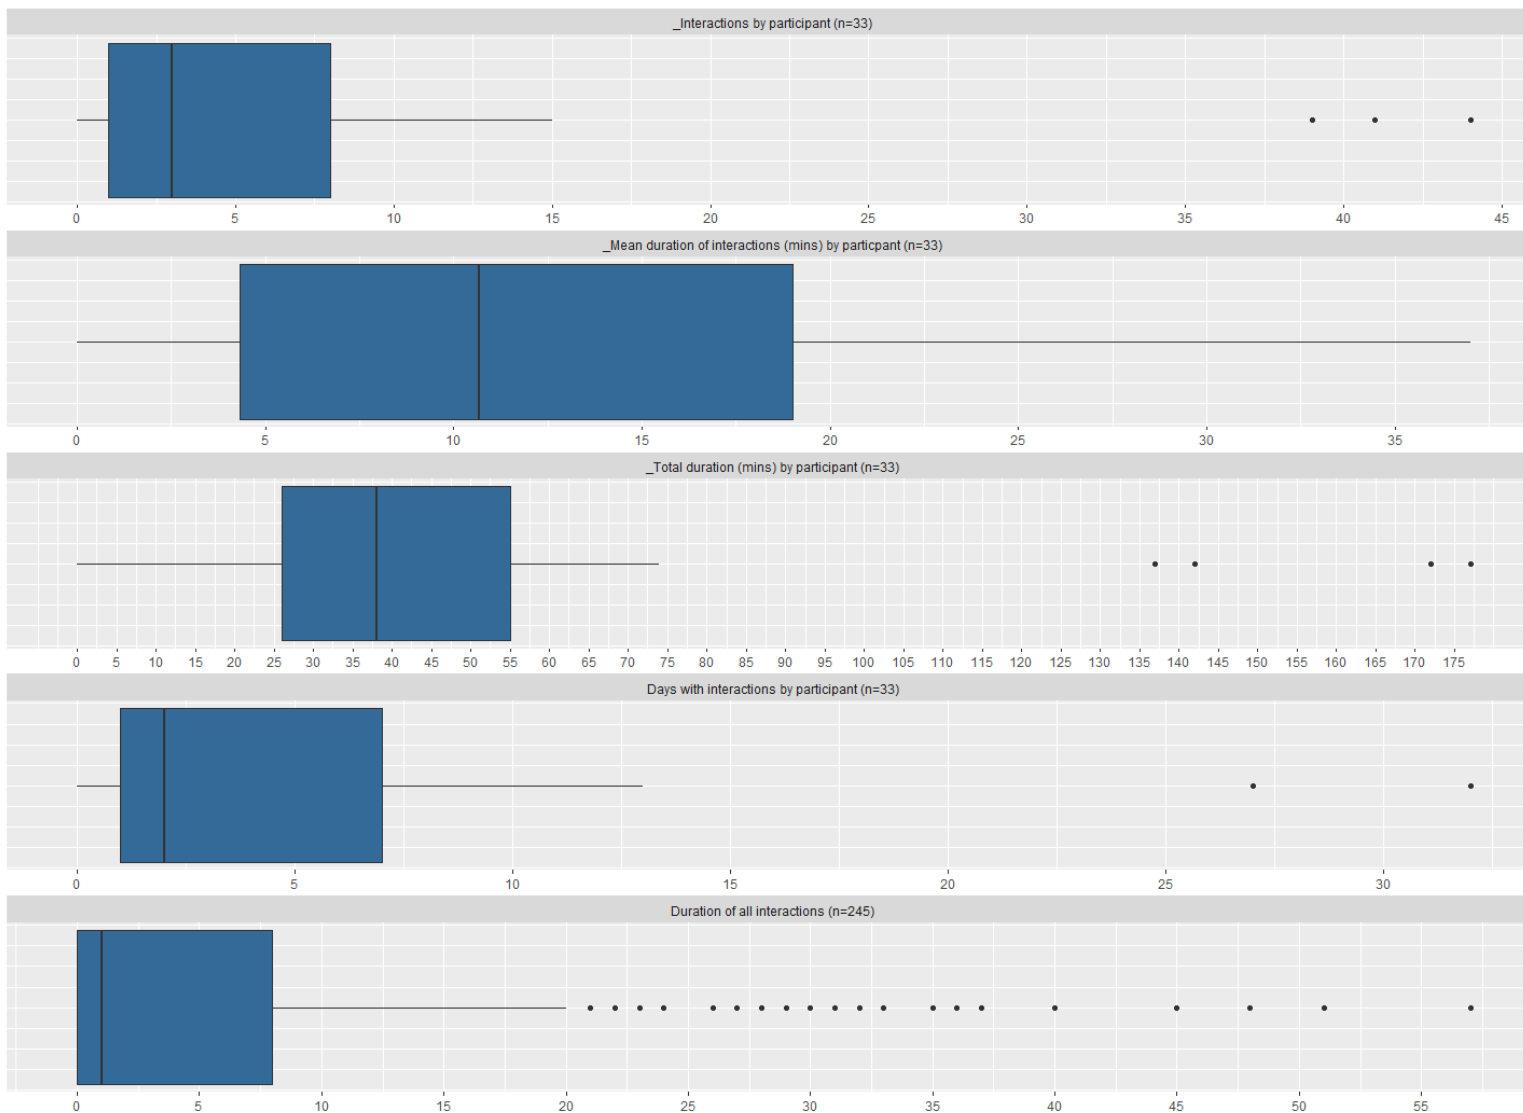



Figure 6: Boxplots showing summaries of click analytics in CFHH

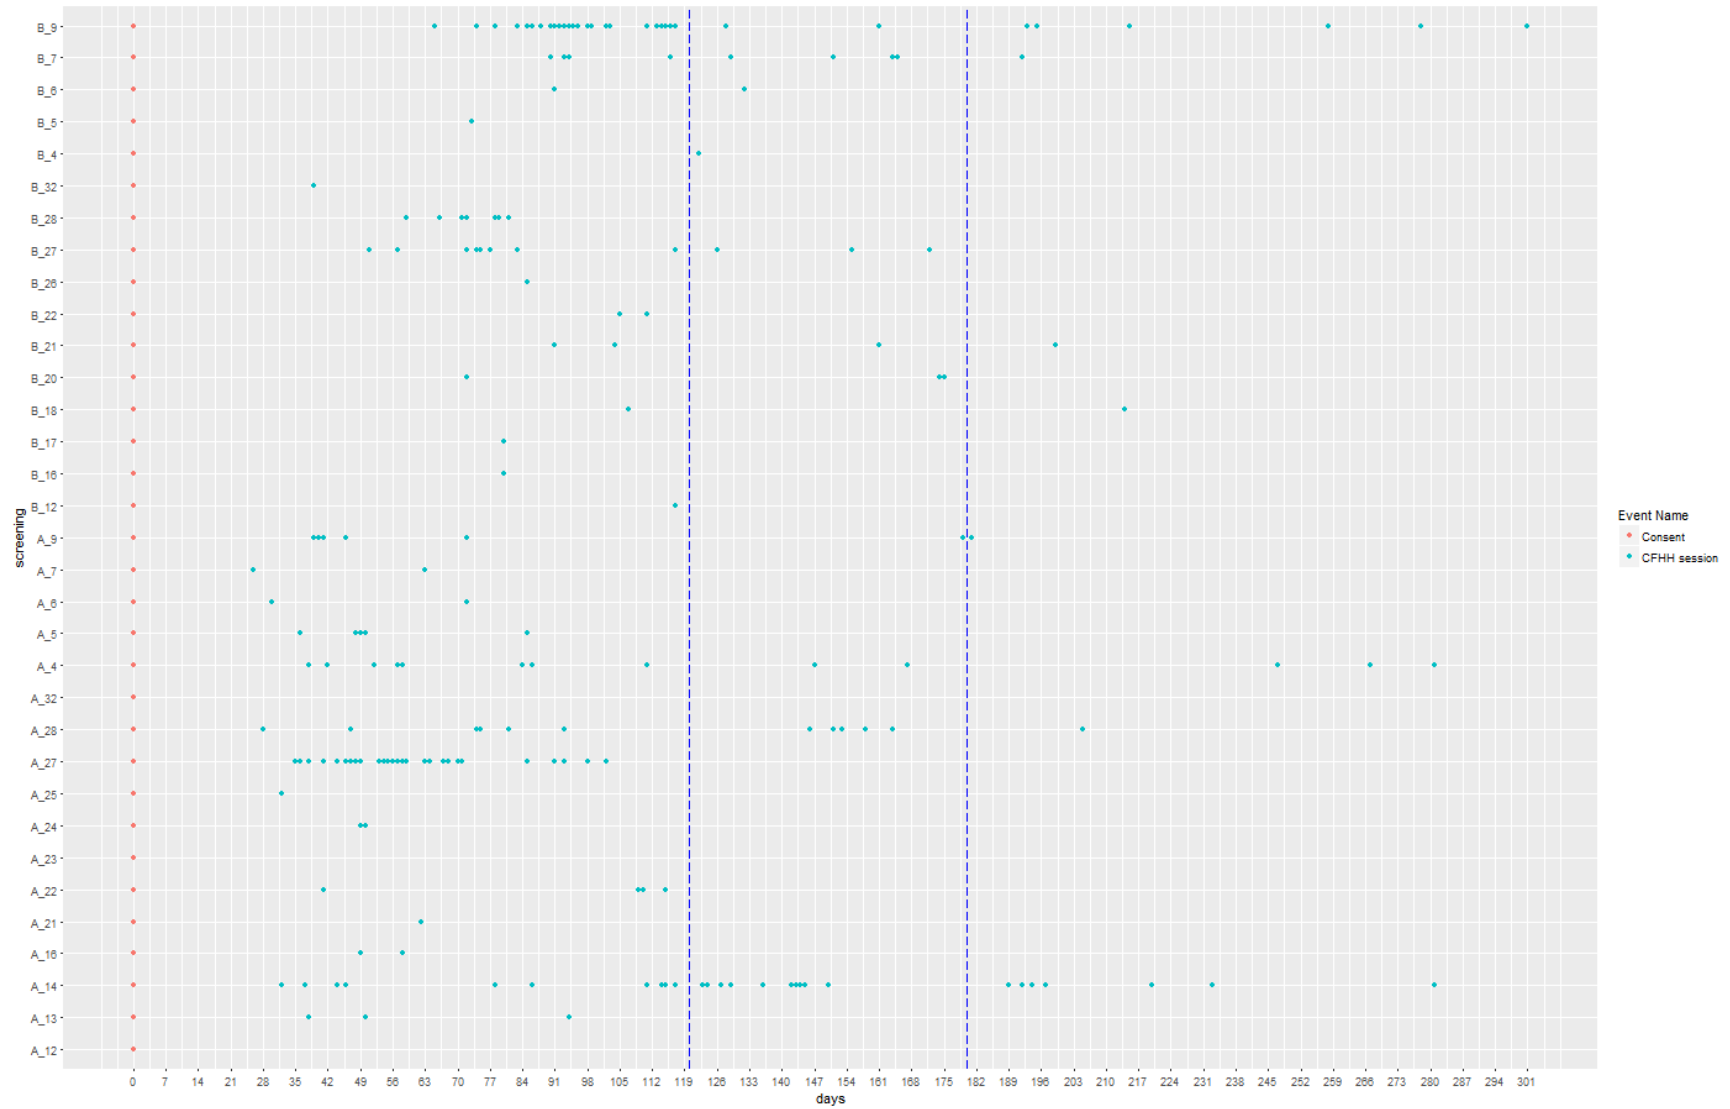

Figure 7: Timing in days of interactions with CFHH

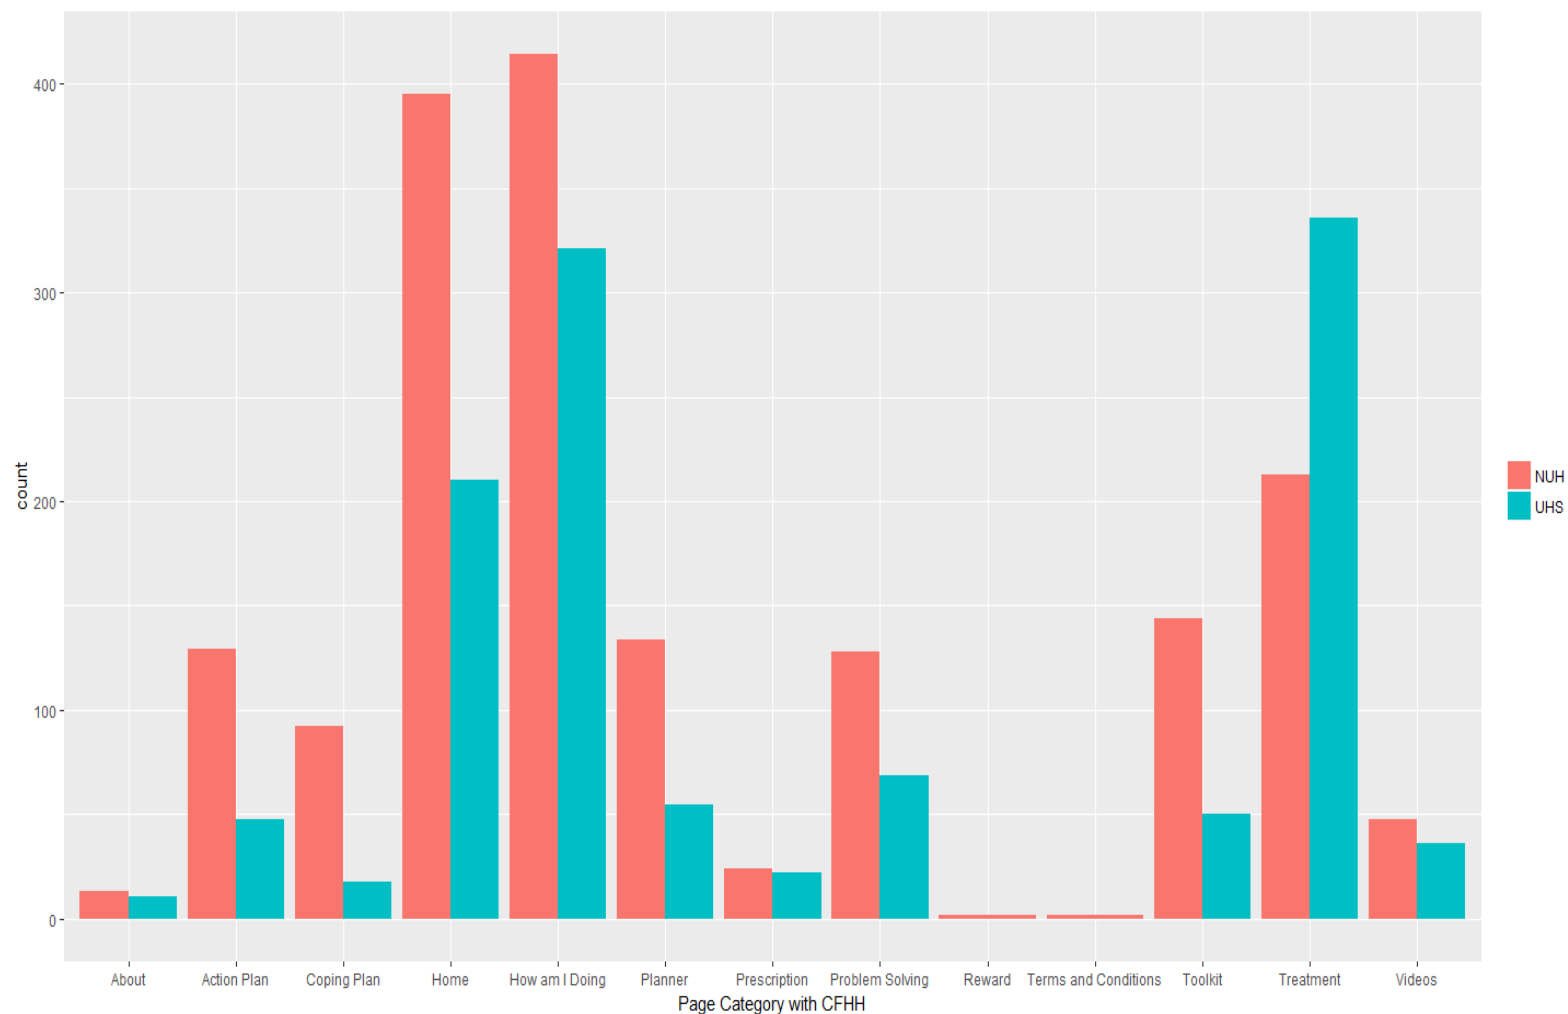

Figure 8: Frequency of clicks by CFHH categories

Table 19: Summary of clicks by page categories in CFHH

|                             | Total (%) clicks | Participants (%) with at least one click | Sessions (%) with at least one click |
|-----------------------------|------------------|------------------------------------------|--------------------------------------|
| <b>About</b>                | 24(0.8%)         | 13(39.4%)                                | 20(8.2%)                             |
| <b>Action Plan</b>          | 177(6.1%)        | 28(84.8%)                                | 53(21.6%)                            |
| <b>Coping Plan</b>          | 110(3.8%)        | 24(72.7%)                                | 38(15.5%)                            |
| <b>Home</b>                 | 605(20.8%)       | 30(90.9%)                                | 244(99.6%)                           |
| <b>How am I Doing</b>       | 735(25.2%)       | 30(90.9%)                                | 224(91.4%)                           |
| <b>Planner</b>              | 189(6.5%)        | 21(63.6%)                                | 39(15.9%)                            |
| <b>Prescription</b>         | 46(1.6%)         | 22(66.7%)                                | 42(17.1%)                            |
| <b>Problem Solving</b>      | 197(6.8%)        | 24(72.7%)                                | 44(18%)                              |
| <b>Reward</b>               | 2(0.1%)          | 2(6.1%)                                  | 2(0.8%)                              |
| <b>Terms and Conditions</b> | 2(0.1%)          | 2(6.1%)                                  | 2(0.8%)                              |
| <b>Toolkit</b>              | 194(6.7%)        | 24(72.7%)                                | 66(26.9%)                            |
| <b>Treatment</b>            | 549(18.8%)       | 30(90.9%)                                | 87(35.5%)                            |
| <b>Videos</b>               | 84(2.9%)         | 30(90.9%)                                | 62(25.3%)                            |

### Intervention fidelity (Clinicians)

Table 21 shows the median number of intervention sessions per participant was 3 (IQR= 2,4) with a mean duration of 36.1 (SD=23.9) minutes.

*Table 20: Summary of intervention sessions received by intervention participants during the study*

|                                                 |               |
|-------------------------------------------------|---------------|
| Sessions per participant                        |               |
| n                                               | 33            |
| Mean (SD)                                       | 3(1.6)        |
| Median (IQR)                                    | 3(2,4)        |
| Min, Max                                        | (0,6)         |
| Total time by participant                       |               |
| n                                               | 33            |
| Mean (SD)                                       | 114.2(46.9)   |
| Median (IQR)                                    | 100.5(90,125) |
| Min, Max                                        | (40,249)      |
| Time per session by participant                 |               |
| n                                               | 33            |
| Mean (SD)                                       | 37.3(14.2)    |
| Median (IQR)                                    | 31.3(28.3,48) |
| Min, Max                                        | (18,65)       |
| Time per session                                |               |
| n                                               | 99            |
| Mean (SD)                                       | 36.1(23.9)    |
| Median (IQR)                                    | 30(15,55)     |
| Min, Max                                        | (4,119)       |
| Intervention session per participant            |               |
| n                                               | 33            |
| Mean (SD)                                       | 0.9(0.3)      |
| Median (IQR)                                    | 1(1,1)        |
| Min, Max                                        | (0,1)         |
| Total Intervention session time per participant |               |
| n                                               | 29            |
| Mean (SD)                                       | 58.1(14.2)    |
| Median (IQR)                                    | 60(48,60)     |
| Min, Max                                        | (35,90)       |

|    |                                                |            |
|----|------------------------------------------------|------------|
| 1  |                                                |            |
| 2  |                                                |            |
| 3  | Review session per participant                 |            |
| 4  |                                                |            |
| 5  | n                                              | 33         |
| 6  | Mean (SD)                                      | 1(0.5)     |
| 7  | Median (IQR)                                   | 1(1,1)     |
| 8  | Min, Max                                       | (0,2)      |
| 9  |                                                |            |
| 10 | Total Review session time per participant      |            |
| 11 |                                                |            |
| 12 | n                                              | 29         |
| 13 | Mean (SD)                                      | 43.2(30.6) |
| 14 | Median (IQR)                                   | 40(20,55)  |
| 15 | Min, Max                                       | (10,154)   |
| 16 |                                                |            |
| 17 | Preparation session per participant            |            |
| 18 |                                                |            |
| 19 | n                                              | 33         |
| 20 | Mean (SD)                                      | 0.7(0.9)   |
| 21 | Median (IQR)                                   | 0(0,1)     |
| 22 | Min, Max                                       | (0,3)      |
| 23 |                                                |            |
| 24 | Total Preparation session time per participant |            |
| 25 |                                                |            |
| 26 | n                                              | 14         |
| 27 | Mean (SD)                                      | 18.4(9.7)  |
| 28 | Median (IQR)                                   | 15(15,30)  |
| 29 | Min, Max                                       | (4,35)     |
| 30 |                                                |            |
| 31 | Ad hoc sessions per participant                |            |
| 32 |                                                |            |
| 33 | n                                              | 33         |
| 34 | Mean (SD)                                      | 0.4(0.6)   |
| 35 | Median (IQR)                                   | 0(0,1)     |
| 36 | Min, Max                                       | (0,2)      |
| 37 |                                                |            |
| 38 | Total ad hoc session time per participant      |            |
| 39 |                                                |            |
| 40 | n                                              | 12         |
| 41 | Mean (SD)                                      | 19.2(6.7)  |
| 42 | Median (IQR)                                   | 15(15,25)  |
| 43 | Min, Max                                       | (15,30)    |
| 44 |                                                |            |
| 45 |                                                |            |
| 46 |                                                |            |
| 47 |                                                |            |
| 48 |                                                |            |
| 49 |                                                |            |
| 50 |                                                |            |
| 51 |                                                |            |
| 52 |                                                |            |
| 53 |                                                |            |
| 54 |                                                |            |
| 55 |                                                |            |
| 56 |                                                |            |
| 57 |                                                |            |
| 58 |                                                |            |
| 59 |                                                |            |
| 60 |                                                |            |

### Clinic visits

Participants completed a median of 2 clinic visits. This was consistent across treatment arms. The number of clinic visits by participant is similar across treatment arms (Figure 9).

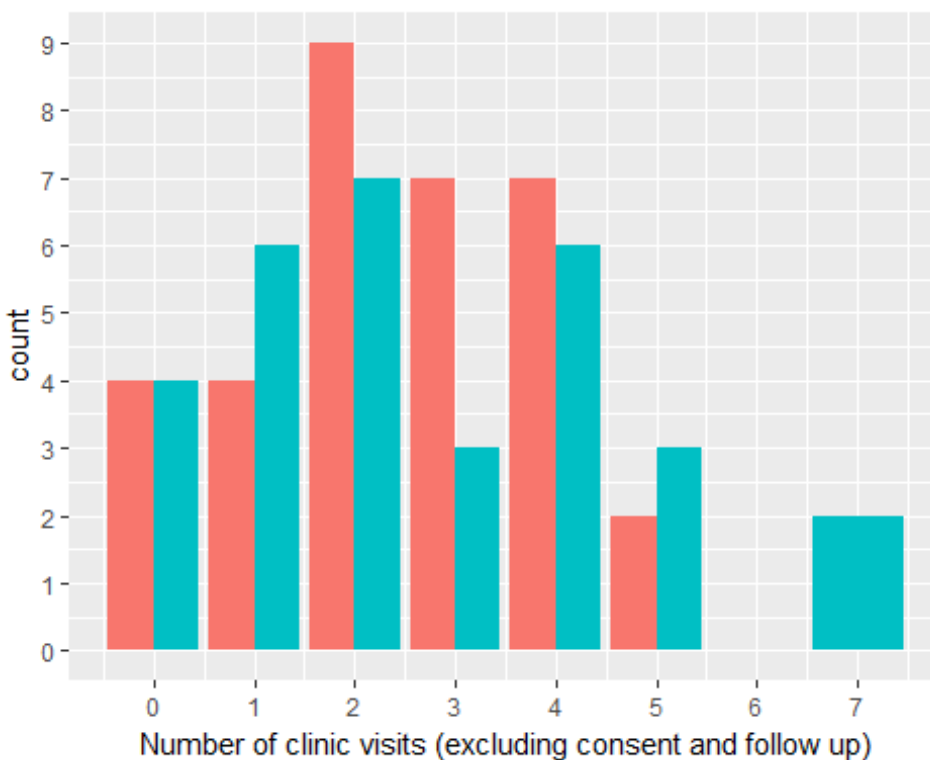

Figure 9: Barplot showing the number of participants for each number of clinic visits by treatment arm

## Safety analysis

A total of 8 adverse events (AEs) occurred during the trial and 7 participants (10.9%) had a least one AE (Table 22). 5 of these were deemed to be Serious Adverse Events (SAEs). None of the SAEs were related to the intervention.

Table 21: Summary of adverse events recorded during the study

|                                 | Intervention n (%) | Control n (%) | Overall n (%) |
|---------------------------------|--------------------|---------------|---------------|
| All Adverse Events              | 5                  | 3             | 8             |
| Participants with at least 1 AE | 4(12.1%)           | 3(9.7%)       | 7(10.9%)      |
| Type of Adverse Event           |                    |               |               |
| Chest pain or chest discomfort  | 1(25%)             | 0(0%)         | 1(14.3%)      |
| Voice change or Alteration      | 0(0%)              | 0(0%)         | 1(14.3%)      |
| Other                           | 4(100%)            | 2(66.7%)      | 6(85.7%)      |

Table 22: Summary of serious adverse events recorded during the study

|                                                 | Intervention n (%) | Control n (%) | Overall n (%) |
|-------------------------------------------------|--------------------|---------------|---------------|
| All Serious Adverse events                      | 3(9.1%)            | 2(6.5%)       | 5(7.8%)       |
| Level of Seriousness                            |                    |               |               |
| Death                                           | 0(0%)              | 2(100%)       | 2(40%)        |
| Hospitalisation                                 | 2(66.7%)           | 0(0%)         | 2(40%)        |
| Persistent or significant disability/incapacity | 1(33.3%)           | 0(0%)         | 1(20%)        |
| Frequency                                       |                    |               |               |
| Isolated                                        | 2(66.7%)           | 2(100%)       | 4(80%)        |
| Continuous                                      | 1(33.3%)           | 0(0%)         | 1(20%)        |
| Intensity                                       |                    |               |               |
| Moderate                                        | 3(100%)            | 0(0%)         | 3(60%)        |
| Severe                                          | 0(0%)              | 2(100%)       | 2(40%)        |
| Outcome                                         |                    |               |               |
| Recovered                                       | 1(33.3%)           | 0(0%)         | 1(20%)        |
| Improved                                        | 2(66.7%)           | 0(0%)         | 2(40%)        |
| Death                                           | 0(0%)              | 2(100%)       | 2(40%)        |
| Expected SAE                                    |                    |               |               |
| No                                              | 3(100%)            | 2(100%)       | 5(100%)       |
| Related to Intervention                         |                    |               |               |
| No                                              | 3(100%)            | 2(100%)       | 5(100%)       |

1  
2  
3  
4  
5  
6  
7  
8  
9  
10  
11  
12  
13  
14  
15  
16  
17  
18  
19  
20  
21  
22  
23  
24  
25  
26  
27  
28  
29  
30  
31  
32  
33  
34  
35  
36  
37  
38  
39  
40  
41  
42  
43  
44  
45  
46  
47  
48  
49  
50  
51  
52  
53  
54  
55  
56  
57  
58  
59  
60

For peer review only



Table 23: Description of serious adverse events recorded during the study (table has been redacted to maintain anonymity)

| Participant ID | Description of event                                                                                                                                                                                                                                             | Serious |
|----------------|------------------------------------------------------------------------------------------------------------------------------------------------------------------------------------------------------------------------------------------------------------------|---------|
| xxx_15         | Patient admitted on xx.xx.16 with acute exacerbation, developed type 2 respiratory failure. Despite maximal treatment of IV antibiotics, oxygen and NIV the patient continued to deteriorate and decision made to palliate. The patient died shortly afterwards. | Yes     |
| xxx_14         | Patient was having a kidney biopsy and had a bleed as a result, so had been kept in hospital on xxxxx ward at xxx city campus.                                                                                                                                   | Yes     |
| xxx_23         | Patient admitted xx/xx/2016 with worsening disease and type 2 respiratory failure. Treated with non-invasive ventilation and intravenous antibiotics. deteriorated despite treatment and passed away xx/xx/2016                                                  | Yes     |
| xxx_17         | Rash reoccurred after re-trying oral antibiotic medication. Advised to stop again                                                                                                                                                                                | No      |
| xxx_17         | Patient on holiday. Telephoned to report rash on both legs after starting new oral antibiotics. Advised to discontinue                                                                                                                                           | No      |
| xxx_20         | Patient was admitted with influenza and CF. Exacerbation treated with iv antibiotics, discharged with home IV's. readmitted on the xx xxx with AKI (Acute Kidney Injury)<br>Assumed secondary to dehydration. Dornase stopped                                    | Yes     |

### Protocol non-compliances

In total, there were 9 protocol non compliances during the trial. 6 (67%) of these were follow up visits conducted outside of the calculated window (5 +/-1 month). 3 (33%) of these were participants ticking statements on the consent form rather than initialling. All of these protocol non compliances were assessed as minor non-compliances.

### Summary of missing data

Exacerbation data was collected for 6 months in 60/64 participants (94%). Adherence was collected for at least 6 months for 58/64 participants (90%).

The number of missing scores for questionnaires completed at baseline and 5 month follow up was very low (Table 25). Completion rate was 100% for the majority of baseline questionnaires and at least 89% for 5 month questionnaires. Missing scores were due to drop out (described in section 2.1). Such high completion rates are reassuring for the main trial.

Table 24: Summary of missing scores and items within questionnaires

|                | Time            | Total | %     | Intervention<br>Median (min,max) | Control Median<br>(min,max) | Overall Median<br>(min,max) |
|----------------|-----------------|-------|-------|----------------------------------|-----------------------------|-----------------------------|
| <b>EQ5D-5L</b> | Baseline        | 64    | 100%  | 5 ( 5 , 5 )                      | 5 ( 5 , 5 )                 | 5 ( 5 , 5 )                 |
| <b>5 items</b> | 5 (+/-1) months | 58    | 90.6% | 5 ( 0 , 5 )                      | 5 ( 0 , 5 )                 | 5 ( 0 , 5 )                 |
| <b>PAM-13</b>  | Baseline        | 64    | 100%  | 13 ( 13 , 13 )                   | 13 ( 13 , 13 )              | 13 ( 13 , 13 )              |
| <b>13 item</b> | 5 (+/-1) months | 59    | 92.2% | 13 ( 0 , 13 )                    | 13 ( 0 , 13 )               | 13 ( 0 , 13 )               |
| <b>CHAOS</b>   | Baseline        | 64    | 100%  | 4 ( 4 , 4 )                      | 4 ( 4 , 4 )                 | 4 ( 4 , 4 )                 |
| <b>4 items</b> | 5 (+/-1) months | 59    | 92.2% | 4 ( 0 , 4 )                      | 4 ( 0 , 4 )                 | 4 ( 0 , 4 )                 |
| <b>MAD-3</b>   | Baseline        | 62    | 96.9% | 3 ( 1 , 3 )                      | 3 ( 0 , 3 )                 | 3 ( 0 , 3 )                 |
| <b>3 items</b> | 5 (+/-1) months | 57    | 89.1% | 3 ( 0 , 3 )                      | 3 ( 0 , 3 )                 | 3 ( 0 , 3 )                 |
| <b>SRBAI</b>   | Baseline        | 63    | 98.4% | 4 ( 0 , 4 )                      | 4 ( 4 , 4 )                 | 4 ( 0 , 4 )                 |
| <b>4 items</b> | 5 (+/-1) months | 59    | 92.2% | 4 ( 0 , 4 )                      | 4 ( 0 , 4 )                 | 4 ( 0 , 4 )                 |
| <b>GAD-7</b>   | Baseline        | 64    | 100%  | 7 ( 7 , 7 )                      | 7 ( 7 , 7 )                 | 7 ( 7 , 7 )                 |
| <b>7 items</b> | 5 (+/-1) months | 59    | 92.2% | 7 ( 0 , 7 )                      | 7 ( 0 , 7 )                 | 7 ( 0 , 7 )                 |
| <b>PHQ-8</b>   | Baseline        | 64    | 100%  | 8 ( 8 , 8 )                      | 8 ( 8 , 8 )                 | 8 ( 8 , 8 )                 |
| <b>8 items</b> | 5 (+/-1) months | 59    | 92.2% | 8 ( 0 , 8 )                      | 8 ( 0 , 8 )                 | 8 ( 0 , 8 )                 |

**Recommendations for Main Trial/ Points for discussion**

- For the primary analysis in the main trial, we would recommend the use of the offset adjusted model as this will allow the use of more data and allows the inclusion of potentially important participants over a greater amount of time. For example, our original model excluded participants who died, however doing so means we have lost key information.
- This is a pilot study, not powered to detect an effect
- The nature of the data means that small changes appear to influence the result greatly

For peer review only

## Appendix

Description of the patient reported outcomes

| Name                 | Score range | Description                                                                                                                       | Interpretation of score                                                                   |
|----------------------|-------------|-----------------------------------------------------------------------------------------------------------------------------------|-------------------------------------------------------------------------------------------|
| <b>EQ-5D-5L</b>      | -0.224-1    | Measure of health status                                                                                                          | A score of zero means death, 1 is full health, negative score is a state worse than death |
| <b>PAM-13</b>        | 0-100       | Measures patient activation e.g. ability and willingness to manage their health. 13 items with scoring spreadsheet                | 0= low patient activation<br>100= high patient activation                                 |
| <b>CHAOS-6</b>       | 0-24        | Measures confusion, hubbub and order. 6 item questionnaire                                                                        | 0= low level of chaos<br>24= high level of chaos                                          |
| <b>SRBAI</b>         | 0-28        | Measure of habit and automaticity 4 item, 7 point likert scale                                                                    | 0= low level of automaticity<br>28= high level of automaticity                            |
| <b>CFQ-R</b>         | 0-100       | 8 domains each score 0-100. The domains are:<br>Physical, Emotion, Social, Eating, Body, Treatment Burden, Respiratory, Digestion | 0= low<br>100= high                                                                       |
| <b>PHQ-8</b>         | 0-24        | Measure of depression. 8 item questionnaire, 0-3 for each item                                                                    | 0= No or minimal depression<br>24= Severe depression                                      |
| <b>GAD-7</b>         | 0-21        | Measure of anxiety. 7 item questionnaire                                                                                          | 0= No anxiety<br>21= Severe anxiety                                                       |
| <b>COM-BBQ</b>       |             |                                                                                                                                   |                                                                                           |
| Specific Necessities | 2-5         | Measure of perceived personal need for medication                                                                                 | Direction of effect would be an increase in score                                         |
| Specific Concerns    | 1-3         | Measure of perceived concerns about the negative effects of the medicine they are taking                                          | Direction of effect would be a decrease in score                                          |
| <b>MAD-3</b>         | 3-15        | Specifically made 3 item questionnaire to measure perceived medication adherence                                                  | 3= low<br>15= high                                                                        |

Additional File 07. Changes to intervention procedures

| Change Number                   | Problem type         | Problem Identified                                                                                                                                                                                   | Solutions implemented in full-scale trial (hashed numbers - # - refer to logic model constructs)                                                                                                                                                       | Timing of change implementation |
|---------------------------------|----------------------|------------------------------------------------------------------------------------------------------------------------------------------------------------------------------------------------------|--------------------------------------------------------------------------------------------------------------------------------------------------------------------------------------------------------------------------------------------------------|---------------------------------|
| <b>CFHealthHub IT component</b> |                      |                                                                                                                                                                                                      |                                                                                                                                                                                                                                                        |                                 |
| 1                               | Real World and Trial | Interventionists having difficulty identifying videos (#22) appropriate for a patient’s needs or interests.                                                                                          | Descriptions were provided with each video. The PPI group agreed with this change and assisted with writing descriptions for each video.                                                                                                               | During the feasibility study    |
| 2                               | Real World and Trial | Adherence charts (#14, #20) were showing >100% adherence. This appeared to be more common in patients with alternating regimes, or taking medications <i>pro re nata</i> (PRN, meaning ‘as needed’). | Prescription flow amended with the addition of PRN or alternating regime alerts, which will assist the data management team in highlighting any data discrepancies.                                                                                    | Post-feasibility study          |
| 3                               | Real World and Trial | Clinician functionality (amending prescriptions/ treatment targets (#3, #23) inaccessible through participant view (used in intervention sessions).                                                  | Participant view functionality implemented to facilitate intervention sessions. Clinicians are now able to run intervention sessions using CFHH through participant view but easily switch to clinician view to change prescriptions and to set goals. | Post-feasibility study          |

|                                |                      |                                                                                                                                                                                                                                                                                                           |                                                                                                                                                                                                                                                                                                                                |                        |
|--------------------------------|----------------------|-----------------------------------------------------------------------------------------------------------------------------------------------------------------------------------------------------------------------------------------------------------------------------------------------------------|--------------------------------------------------------------------------------------------------------------------------------------------------------------------------------------------------------------------------------------------------------------------------------------------------------------------------------|------------------------|
| 4                              | Real World and Trial | The lead psychologist identified the need to determine which participants were receiving push notifications as this relates to dose and rewards for adherence.                                                                                                                                            | The option to export data about number of push notifications sent to participants from the app (#16).                                                                                                                                                                                                                          | Post-feasibility study |
| 5                              | Real World and Trial | Originally the normative adherence was used to come up with the percentage adherence. It was identified this did not always match what participants were actually prescribed and this made the graphs difficult to interpret. The capping of the weekly graph at 100% also made interpretation difficult. | To improve interpretability of adherence data (#14), percentages are now calculated against the actual treatments prescribed and graphs are not capped at 100% to aid any interpretation of graphs and trouble shooting.                                                                                                       | Post-feasibility study |
| <b>Other IT infrastructure</b> |                      |                                                                                                                                                                                                                                                                                                           |                                                                                                                                                                                                                                                                                                                                |                        |
| 6                              | Real World and Trial | Flatlines at the beginning of some participant adherence run charts were identified to relate to the date registered at the time the nebuliser (#4) is paired with the Qualcomm Hub (#5). Flatlines at the end of the feasibility study were also observed (#14, #35).                                    | To achieve quality assurance of adherence data (#4, #5, #14, #35), hardware is now paired at the factory. The full-scale trial has been monitoring for, and has not found, such instances. Flatlines at the end of run charts established as genuine through triangulation with self-report quantitative and qualitative data. | Post-feasibility study |

| Interventionist training and manual |                      |                                                                                                                                                                                                                     |                                                                                                                                                                                                                                                                                                         |                        |
|-------------------------------------|----------------------|---------------------------------------------------------------------------------------------------------------------------------------------------------------------------------------------------------------------|---------------------------------------------------------------------------------------------------------------------------------------------------------------------------------------------------------------------------------------------------------------------------------------------------------|------------------------|
| 7                                   | Real World and Trial | Training packages were initially developed for physiotherapists. This led to interventionist recruitment problems.                                                                                                  | The job specification and training was redeveloped to suit non-physiotherapists (#9, #12), to enable any member of the MDT to be trained up to deliver the intervention. A suitably qualified individual such as a postgraduate psychologist could be supported by the MDT to deliver the intervention. | Post-feasibility study |
| 8                                   | Real World and Trial | The interventionist job specification did not reflect the flexibility needed to carry out the interventionist role- e.g. flexibility in working patterns, skills in motivational interviewing and extensive travel. | The research team, with input from the interventionists, revised the job specification for the interventionist role based on experience of delivering the intervention in the pilot in order to better manage expectations of the role (#12).                                                           | Post-feasibility study |
| 9                                   | Real World and Trial | Pilot study interventionists felt that training was good but could be helped by introducing case studies with real world data, in CFHealthHub.                                                                      | Realistic case studies with data to support interventionist training / role plays for using website were developed to provide training more applicable to real CF patients (#9). This model is generally used in a healthcare training setting.                                                         | Post-feasibility study |
| 10                                  | Real World and Trial | Sporadic training over six weeks, whilst also conducting research procedures was                                                                                                                                    | Training was condensed into an intensive course over ten days, focusing solely on intervention delivery (#9).                                                                                                                                                                                           | Post-feasibility study |

|    |                      |                                                                                                                                                                                                                      |                                                                                                                                                                                                                                          |                        |
|----|----------------------|----------------------------------------------------------------------------------------------------------------------------------------------------------------------------------------------------------------------|------------------------------------------------------------------------------------------------------------------------------------------------------------------------------------------------------------------------------------------|------------------------|
|    |                      | overwhelming for interventionists.                                                                                                                                                                                   |                                                                                                                                                                                                                                          |                        |
| 11 | Real World and Trial | Assessment of intervention fidelity identified that some of the active ingredients of the intervention were absent e.g. negotiating goals and letting participants take ownership of choices.                        | The recruitment and training process was modified to incorporate role play at the interview; explaining fidelity assessment criteria during training and also on-going assessment to ensure that any issues are identified quickly (#9). | Post-feasibility study |
| 12 | Real World and Trial | The focus of interventionists during intervention delivery was not always on the aspects that evidence would indicate are the most active ingredients for example goal setting, action planning and coping planning. | Emphasis was placed on the main 'active ingredients' in the manual and in training (#8, #9).                                                                                                                                             | Post-feasibility study |
| 13 | Real World and Trial | During the course of the trial, it became apparent that participants were not being followed up and engaged in a manner to allow them to build a habit.                                                              | Focus on habit formation / revised logic model will be implemented by a 6-8 week period of habit formation sessions (#8).                                                                                                                | Post-feasibility study |
| 14 | Real World and Trial | It was identified that after some participants last review visit, their adherence to treatment dropped.                                                                                                              | For the full RCT, intervention visits are now triggered if the participant is having an exacerbation/IV, has a drop of 20% or more adherence in the last 4 weeks and if the participant requests additional support.                     | Post-feasibility study |



1  
2  
3  
4  
5  
6  
7  
8  
9  
10  
11  
12  
13  
14  
15  
16  
17  
18  
19  
20  
21  
22  
23  
24  
25  
26  
27  
28  
29  
30  
31  
32  
33  
34  
35  
36  
37  
38  
39  
40  
41  
42  
43  
44  
45  
46

|  |  |  |                                                    |  |
|--|--|--|----------------------------------------------------|--|
|  |  |  | These will be termed ‘intervention triggers’ (#8). |  |
|--|--|--|----------------------------------------------------|--|

For peer review only

**Good Reporting of A Mixed Methods Study (GRAMMS).**

O’Cathain A, Murphy E, Nicholl J. The quality of mixed methods studies in health services research. *J Health Serv Res Policy* 2008;13:92–8. doi:10.1258/jhsrp.2007.007074

Added to the EQUATOR Network database 26/09/2013.

**(1) Describe the justification for using a mixed methods approach to the research question.**

p5; lines 93-95.

**(2) Describe the design in terms of the purpose, priority and sequence of methods**

p11; line 240: we used a modified triangulation protocol; the study is described as nested, indicating, that the methods were used concurrently (p9; line 192).

**(3) Describe each method in terms of sampling, data collection and analysis**

Pages 9-12; 195-273.

**(4) Describe where integration has occurred, how it has occurred and who has participated in it**

Pages 11-12; Lines 240-273.

**(5) Describe any limitation of one method associated with the present of the other method**

Page 25; Lines 576-582.

**(6) Describe any insights gained from mixing or integrating methods**

p5; lines 93-95. p25; lines 573-611.
