# Supplementary material for: Feasibility study for supporting medication adherence for adults with cystic fibrosis: mixed-methods process evaluation
Source: PubMed Central journal article supplement (PMC7592300; doi:10.1136/bmjopen-2020-039089), 2020-10-27

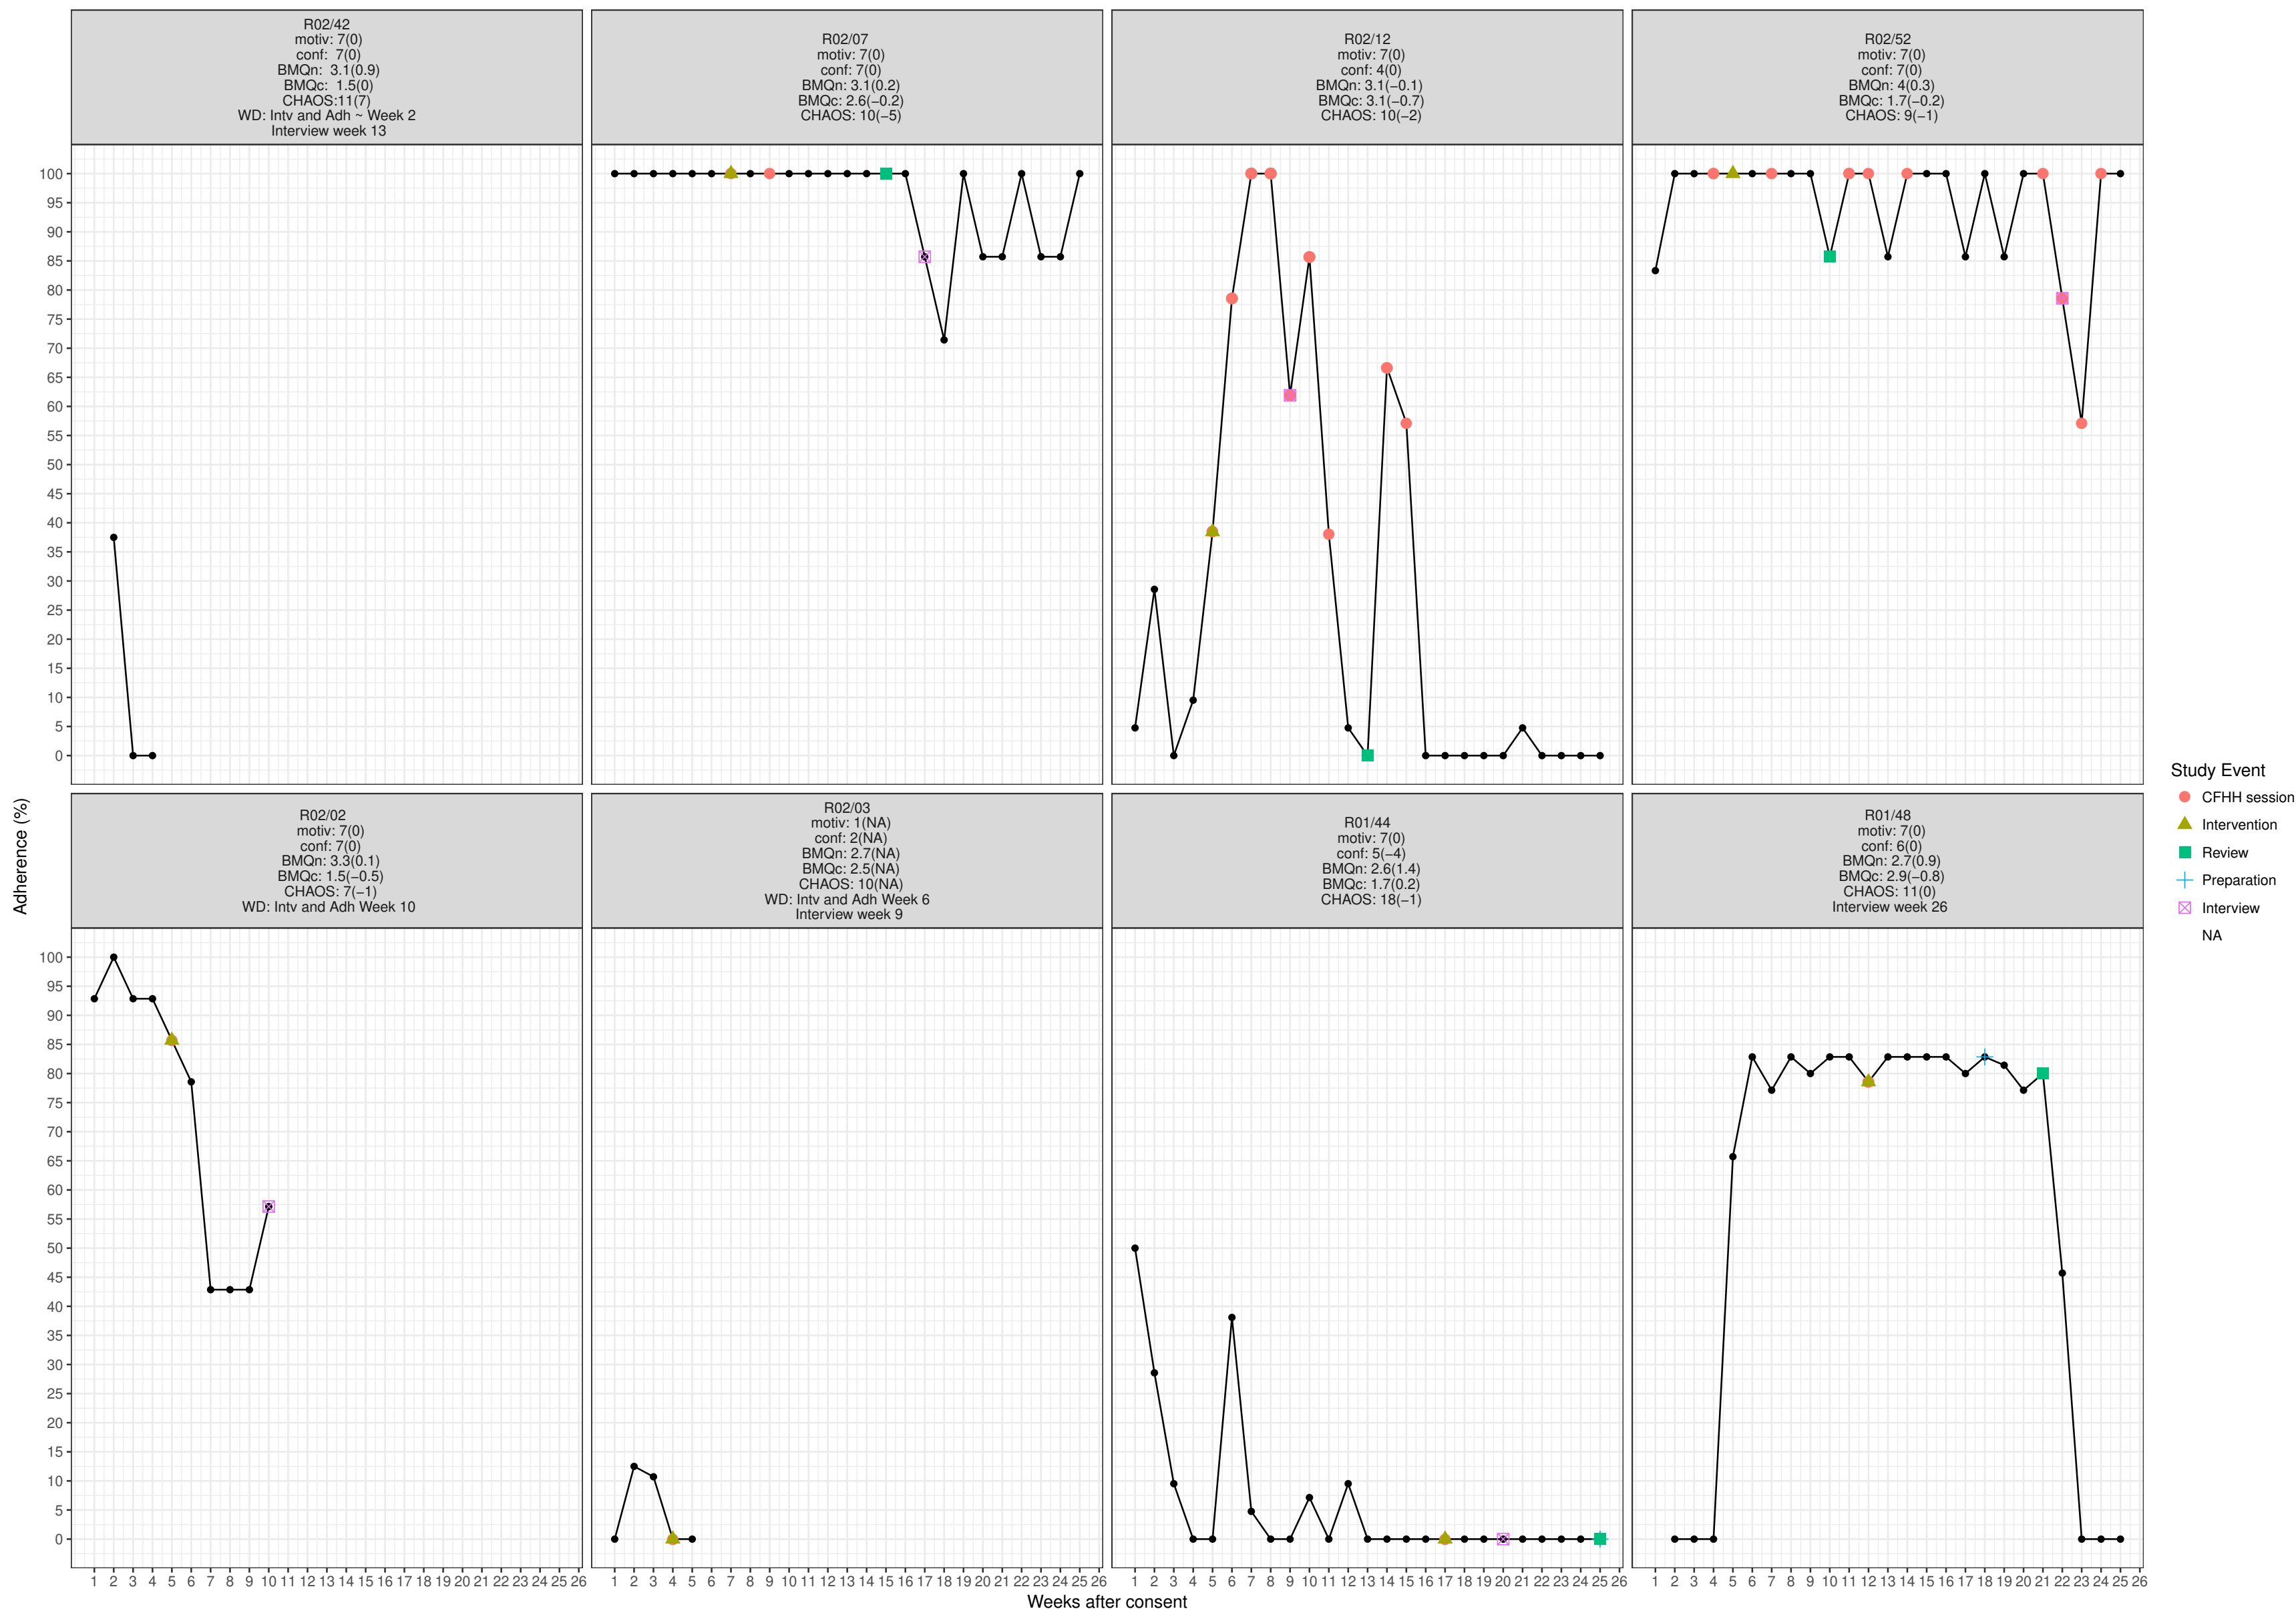

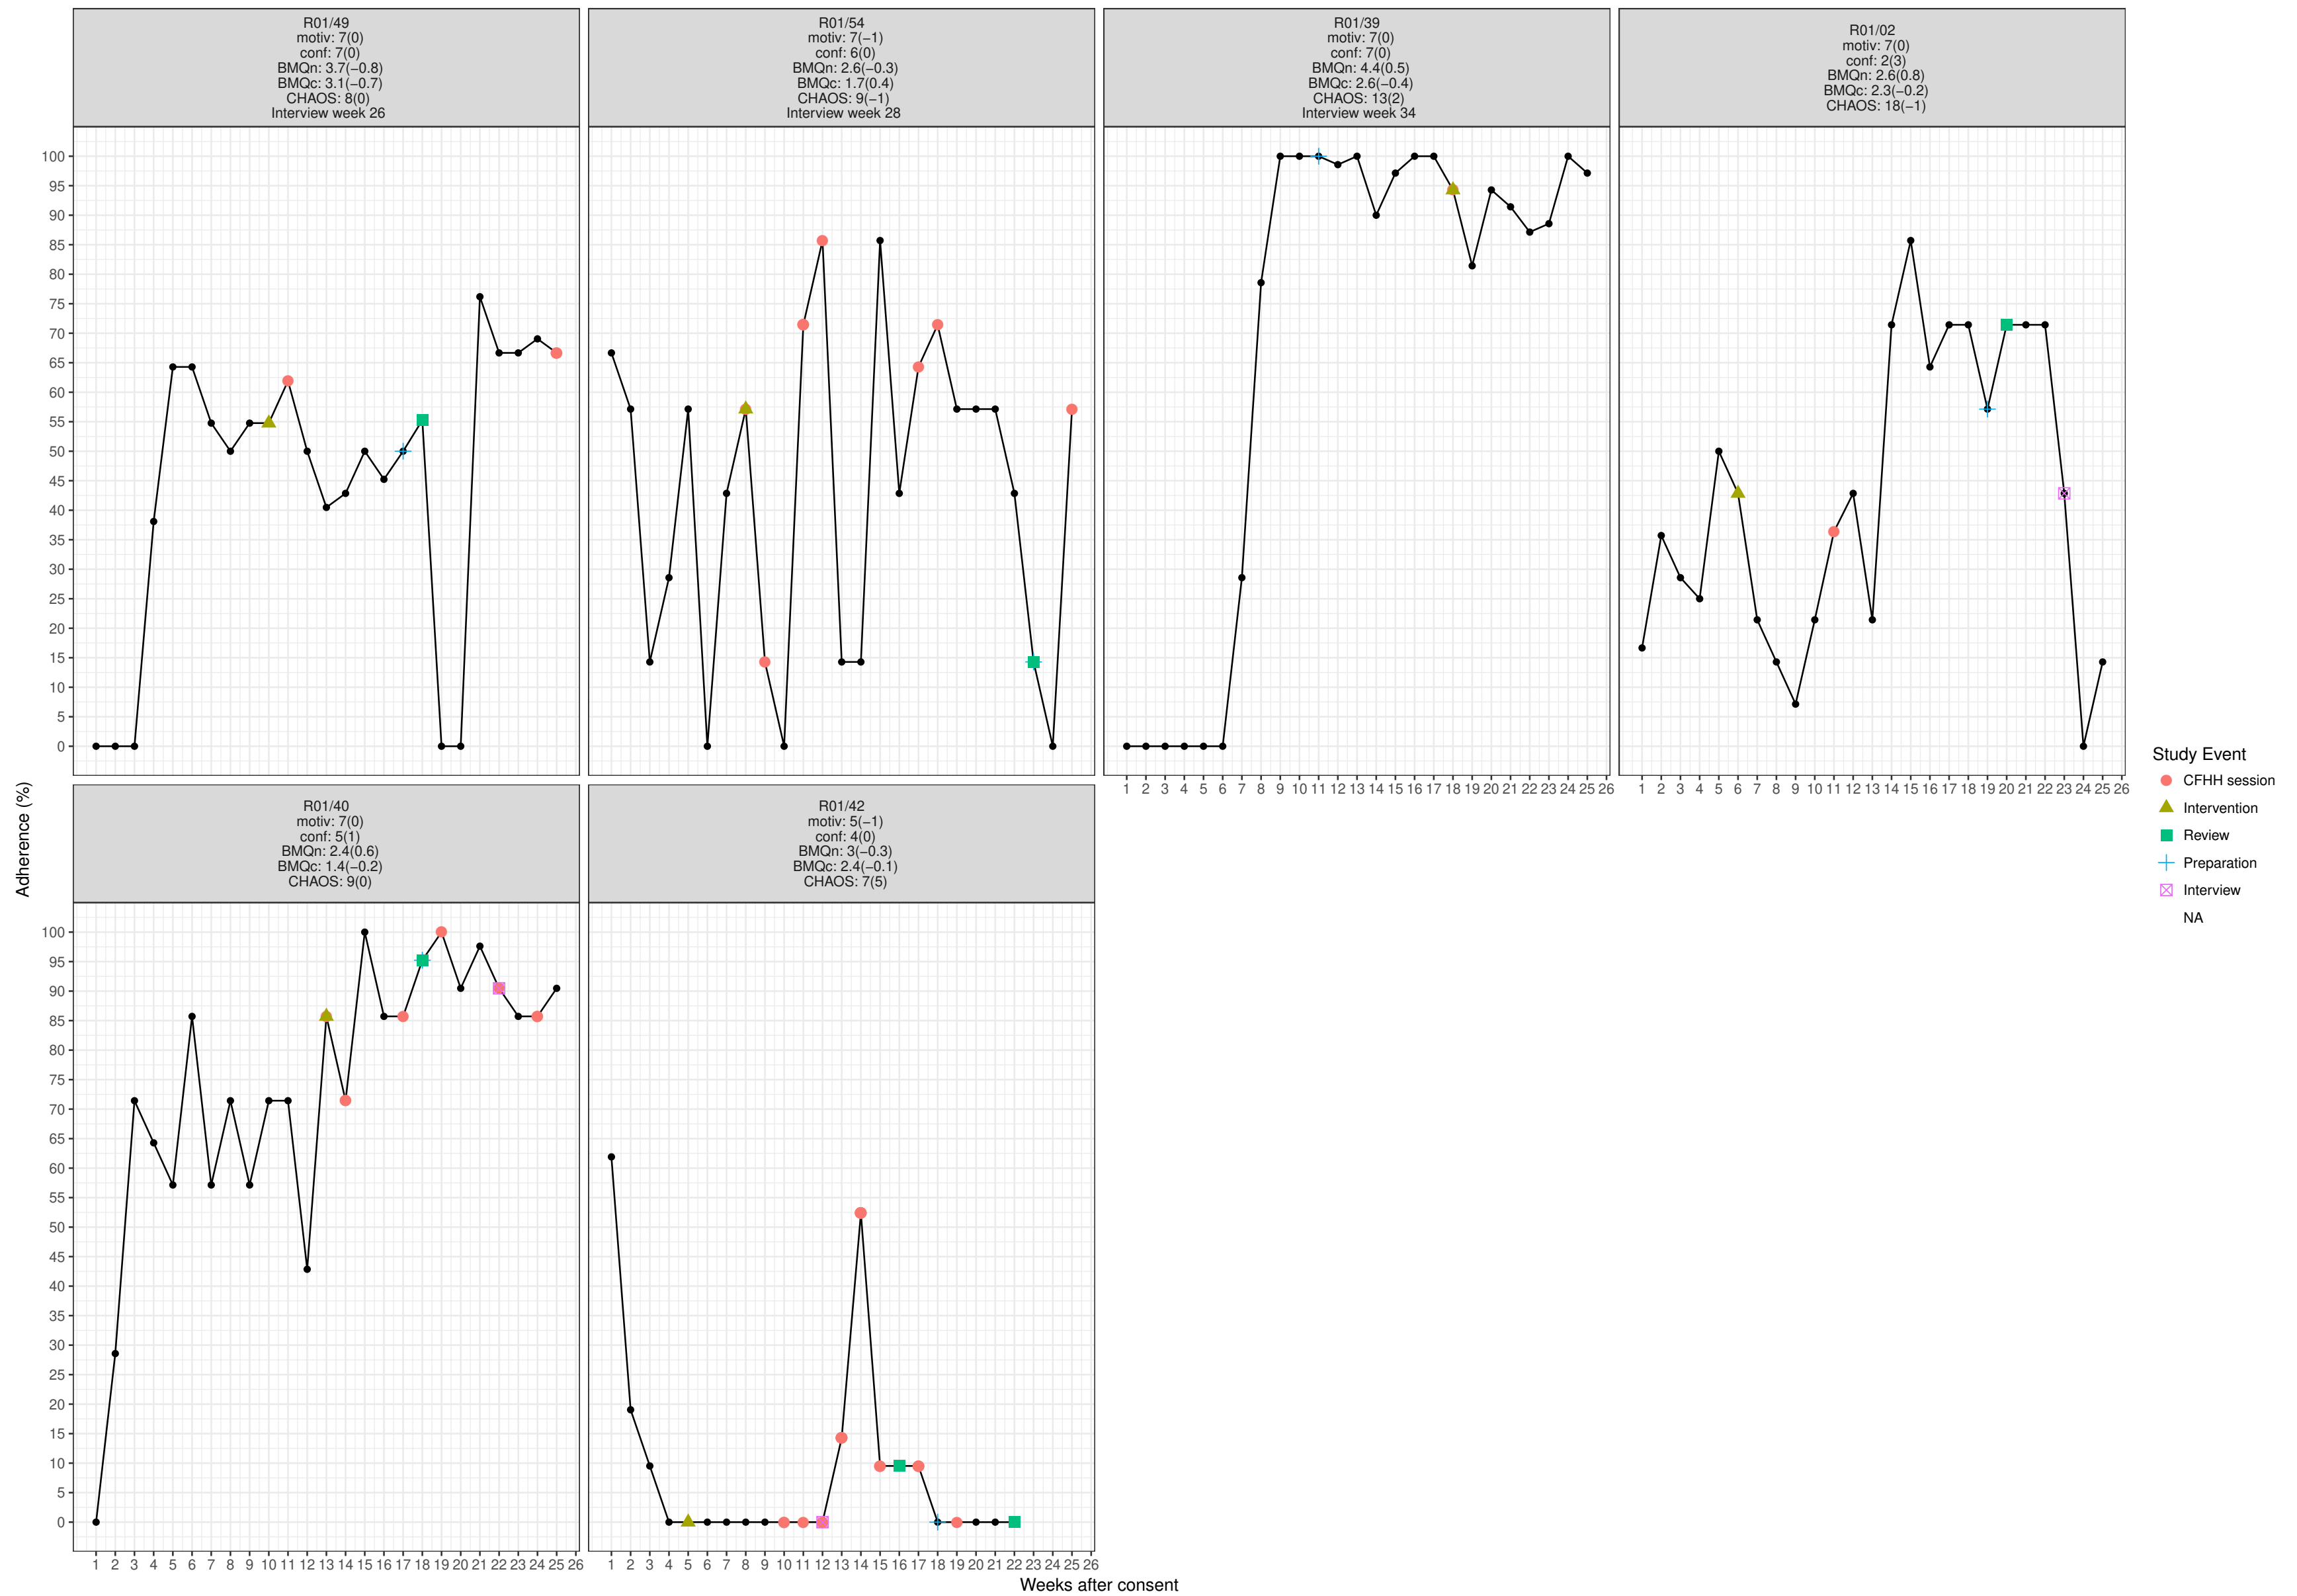

Supplement: bmjopen-2020-039089supp001.pdf [file bmjopen-2020-039089supp001.pdf]
