# Supplementary material for: Feasibility study for supporting medication adherence for adults with cystic fibrosis: mixed-methods process evaluation
Source: PubMed Central journal article supplement (PMC7592300; doi:10.1136/bmjopen-2020-039089), 2020-10-27
Supplement: bmjopen-2020-039089supp003.pdf [file bmjopen-2020-039089supp003.pdf]

**Additional File 03 - Quantitative results from process evaluation****Table a. Key dates in process evaluation by participant**

| Study ID | Interview Date | Baseline date | 5 month follow up date | Date of first intervention meeting | Time in the trial at interview (days) | Time since first intervention session at interview (days) | Time in trial at follow up (days) |
|----------|----------------|---------------|------------------------|------------------------------------|---------------------------------------|-----------------------------------------------------------|-----------------------------------|
| R02/02   | 13/09/2016     | 06/07/2016    | 10/11/2016             | 05/08/2016                         | 69                                    | 39                                                        | 127                               |
| R02/03   | 09/09/2016     | 08/07/2016    | NA                     | 05/08/2016                         | 63                                    | 35                                                        | NA                                |
| R02/42   | 12/10/2016     | 15/07/2016    | 21/12/2016             | NA                                 | 89                                    | NA                                                        | 159                               |
| R02/07   | 15/11/2016     | 12/07/2016    | 12/12/2016             | 09/09/2016                         | 126                                   | 67                                                        | 153                               |
| R02/12   | 02/11/2016     | 14/07/2016    | 03/01/2017             | 05/10/2016                         | 111                                   | 28                                                        | 173                               |
| R02/52   | 03/02/2017     | 04/07/2016    | 22/11/2016             | 05/10/2016                         | 214                                   | 121                                                       | 141                               |
| R01/44   | 01/12/2016     | 07/07/2016    | 16/11/2016             | 08/11/2016                         | 147                                   | 23                                                        | 132                               |

|        |            |            |            |            |     |     |     |
|--------|------------|------------|------------|------------|-----|-----|-----|
| R01/48 | 17/01/2017 | 04/07/2016 | 15/11/2016 | 13/10/2016 | 197 | 96  | 134 |
| R01/49 | 30/01/2017 | 22/07/2016 | 07/12/2016 | 10/10/2016 | 192 | 112 | 138 |
| R01/54 | 21/03/2017 | 25/07/2016 | 13/12/2016 | 02/11/2016 | 239 | 139 | 141 |
| R01/39 | 27/02/2017 | 02/08/2016 | 21/12/2016 | 03/11/2016 | 209 | 116 | 141 |
| R01/02 | 06/12/2016 | 31/08/2016 | 25/01/2017 | 15/08/2016 | 97  | 113 | 147 |
| R01/40 | 05/12/2016 | 05/09/2016 | 17/02/2017 | 05/10/2016 | 91  | 61  | 165 |
| R01/42 | 03/10/2016 | 12/09/2016 | 15/02/2017 | 15/08/2016 | 21  | 49  | 156 |

**Table b. Interventionist-generated motivation data (intervention arm)** R02/42, R02/49, R02/15 and R01/48 were all missing

| Participant ID | Date           | Consent Visit Motivation Rating | Was Participant motivation too low Answer Yes/No |
|----------------|----------------|---------------------------------|--------------------------------------------------|
| R02/39         | 05.08.16       | 7                               | No                                               |
| R02/40         | 23.08.16       | 4                               | No                                               |
| R02/02         | 05.08.16       | 7                               | No                                               |
| R02/03         | 03.08.16       | 1                               | No                                               |
| R02/43         | 12.08.16       | 7                               | No                                               |
| R02/05         | 22.08.16       | 5                               | No                                               |
| R02/45         | 18.08.16       | 7                               | No                                               |
| R02/07         | 09.08.16       | 7                               | No                                               |
| R02/48         | 05.10.16       | 7                               | No                                               |
| R02/10         | 14.09.16       | 7                               | No                                               |
| R02/11         | 28.09.16       | 7                               | No                                               |
| R02/50         | 26.09.16       | 7                               | No                                               |
| R02/12         | 05.10.16       | 7                               | No                                               |
| R02/52         | 03.10.16       | 7                               | No                                               |
| R01/39         | 03.11.16       | 7                               | Page missing from report                         |
| R01/02         | 16.09.16       | 7                               | No                                               |
| R01/03         | 03.10.16       | 5                               | No                                               |
| R01/40         | 05.10.16       | 7                               | Page missing from report                         |
| R01/42         | 15.08.16       | 5                               | Page missing from report                         |
| R01/44         | 08.11.16       | 7                               | Page missing from report                         |
| R01/47         | 10.10.16       | 5                               | Yes                                              |
| R01/06         | 10.10.16       | 7                               | Page missing from report                         |
| R01/49         | 17.10.16       | 7                               | No                                               |
| R01/08         | 01.11.16       | 7                               | Page missing from report                         |
| R01/50         | Missing report |                                 |                                                  |
| R01/53         | 29.11.16       | 7                               | Not ticked                                       |
| R01/54         | Missing report |                                 |                                                  |
| R01/10         | 10.11.16       | 2                               | Not ticked                                       |
| R01/57         | 31.10.16       | 0                               | Yes                                              |

**Table c. Engagement**

|                                  | Adherence data collected (did not withdraw from data collection before 6m)<br>n(%) | Total CFHH sessions Median (IQR) | Baseline adherence Median (IQR) |
|----------------------------------|------------------------------------------------------------------------------------|----------------------------------|---------------------------------|
| <b>Overall (n=33)</b>            | 29(88%)                                                                            | 3(1,8)                           | 20(2.1,47.8)                    |
| <b>Qualitative case studies</b>  |                                                                                    |                                  |                                 |
| <b>High adherence at end</b>     |                                                                                    |                                  |                                 |
| R01/39                           | Yes                                                                                | 1                                | 0                               |
| R02/07                           | Yes                                                                                | 2                                | 96.7                            |
| R01/40                           | Yes                                                                                | 9                                | 43.1                            |
| R02/52                           | Yes                                                                                | 13                               | 96.6                            |
| <b>Moderate adherence at end</b> |                                                                                    |                                  |                                 |
| R01/49                           | Yes                                                                                | 4                                | 13.2                            |
| <b>Low adherence at end</b>      |                                                                                    |                                  |                                 |
| R01/54                           | Yes                                                                                | 11                               | 44.8                            |
| R01/02                           | Yes                                                                                | 1                                | 30.2                            |
| R01/48                           | Yes                                                                                | 3                                | 1.8                             |
| R02/12                           | Yes                                                                                | 44                               | 10.2                            |
| R02/03                           | No                                                                                 | 3                                | 5.4                             |
| R01/44                           | Yes                                                                                | 1                                | 19.5                            |
| <b>Withdrawn</b>                 |                                                                                    |                                  |                                 |
| R01/42                           | Yes                                                                                | 41                               | 21.1                            |
| R02/02                           | No                                                                                 | 3                                | 92.5                            |
| R02/42                           | No                                                                                 | 0                                | 4.2                             |

Note: R02/42, R02/02 withdrew from adherence data collection and from the intervention and R02/03 was lost to follow-up. R01/42 did not withdraw from data collection until the end of the study; they did not contribute sufficient data for the 150-180 day period.

**Table d. Activities: all participants**

|                                                | Self-monitoring adherence | Tailored education about treatment | Tailored patient stories (videos) | Personalised action plan/Personalised goal-setting | Tailored problem-solving |                    | Goal review; Rewards                 |
|------------------------------------------------|---------------------------|------------------------------------|-----------------------------------|----------------------------------------------------|--------------------------|--------------------|--------------------------------------|
|                                                | Clicks How am I doing?    | Clicks Toolkit                     | Clicks Videos                     | Clicks Action Plan                                 | Clicks Problem Solving   | Clicks Coping Plan | Review sessions with Interventionist |
| <b>Mean (SD)†/Median* (IQR) overall (n=33)</b> | 11( 5 , 30 )*             | 3( 0 , 7 )*                        | 2( 1 , 3 )*                       | 2( 1 , 7 )*                                        | 3( 0 , 8 )*              | 1( 0 , 3 )*        | 1(0.5)†                              |
| <b>Qualitative case studies</b>                |                           |                                    |                                   |                                                    |                          |                    |                                      |
| <b>High adherence at end</b>                   |                           |                                    |                                   |                                                    |                          |                    |                                      |
| R01/39                                         | 8                         | 3                                  | 1                                 | 1                                                  | 0                        | 1                  | 1                                    |
| R02/07                                         | 5                         | 1                                  | 1                                 | 1                                                  | 2                        | 0                  | 1                                    |
| R01/40                                         | 52                        | 0                                  | 1                                 | 1                                                  | 3                        | 0                  | 1                                    |
| R02/52                                         | 70                        | 5                                  | 3                                 | 1                                                  | 17                       | 1                  | 1                                    |
| <b>Medium adherence at end</b>                 |                           |                                    |                                   |                                                    |                          |                    |                                      |
| R01/49                                         | 30                        | 2                                  | 1                                 | 0                                                  | 1                        | 0                  | 1                                    |
| <b>Low adherence at end</b>                    |                           |                                    |                                   |                                                    |                          |                    |                                      |
| R01/54                                         | 24                        | 4                                  | 5                                 | 3                                                  | 4                        | 2                  | 1                                    |
| R01/02                                         | 3                         | 0                                  | 1                                 | 2                                                  | 0                        | 1                  | 2                                    |
| R01/48                                         | 38                        | 6                                  | 2                                 | 7                                                  | 7                        | 1                  | 1                                    |
| R02/12                                         | 98                        | 12                                 | 10                                | 13                                                 | 14                       | 8                  | 1                                    |
| R02/03                                         | 15                        | 12                                 | 1                                 | 25                                                 | 1                        | 14                 | 1                                    |
| R01/44                                         | 11                        | 0                                  | 2                                 | 4                                                  | 8                        | 3                  | 1                                    |
| <b>Withdrawn</b>                               |                           |                                    |                                   |                                                    |                          |                    |                                      |
| R01/42                                         | 69                        | 18                                 | 9                                 | 16                                                 | 20                       | 3                  | 2                                    |
| R02/02                                         | 3                         | 7                                  | 1                                 | 8                                                  | 8                        | 7                  | 1                                    |
| R02/42                                         | 0                         | 0                                  | 0                                 | 0                                                  | 0                        | 0                  | 0                                    |

**Table e. Activities: highly motivated participants**

(Those who answered 'No' to question, 'Was the participant motivation too low') n=17. Some of these were missing or not answered n=14, only 2 answered 'Yes'.

|                                                                | Self-monitoring adherence | Tailored education about treatment | Tailored patient stories (videos) | Personalised action plan/Personalised goal-setting | Tailored problem-solving |                    | Goal review; Rewards                 |
|----------------------------------------------------------------|---------------------------|------------------------------------|-----------------------------------|----------------------------------------------------|--------------------------|--------------------|--------------------------------------|
|                                                                | Clicks How am I doing?    | Clicks Toolkit                     | Clicks Videos                     | Clicks Action Plan                                 | Clicks Problem Solving   | Clicks Coping Plan | Review sessions with Interventionist |
| <b>High motivation Mean (SD)†/Median* (IQR) overall (n=17)</b> | 16 (5 33)*                | 5 (2,12)*                          | 3 (1 , 4)*                        | 4 (2 , 12)*                                        | 4(2 , 11)*               | 1(1 , 7)*          | 1.12(0.33)†                          |
| <b>Qualitative case studies (high motivation)</b>              |                           |                                    |                                   |                                                    |                          |                    |                                      |
| <b>R02/07</b>                                                  | 5                         | 1                                  | 1                                 | 1                                                  | 2                        | 0                  | 1                                    |
| <b>R02/52</b>                                                  | 70                        | 5                                  | 3                                 | 1                                                  | 17                       | 1                  | 1                                    |
| <b>R01/49</b>                                                  | 30                        | 2                                  | 1                                 | 0                                                  | 1                        | 0                  | 1                                    |
| <b>R01/02</b>                                                  | 3                         | 0                                  | 1                                 | 2                                                  | 0                        | 1                  | 2                                    |
| <b>R02/12</b>                                                  | 98                        | 12                                 | 10                                | 13                                                 | 14                       | 8                  | 1                                    |
| <b>R02/03</b>                                                  | 15                        | 12                                 | 1                                 | 25                                                 | 1                        | 14                 | 1                                    |
| <b>R02/02</b>                                                  | 3                         | 7                                  | 1                                 | 8                                                  | 8                        | 7                  | 1                                    |

**Table f. Process Outcomes**

|                                 | Accurate awareness of adherence                                       | Increased Motivation                                                                         | Increased necessity and decreased concern / beliefs Motivation |                                    | Increased self-efficacy /                                                                               | Motivation                             | Increased habit /            | Reduced CHAOS                | Reduced barriers                           |
|---------------------------------|-----------------------------------------------------------------------|----------------------------------------------------------------------------------------------|----------------------------------------------------------------|------------------------------------|---------------------------------------------------------------------------------------------------------|----------------------------------------|------------------------------|------------------------------|--------------------------------------------|
|                                 | Subjective adherence (0-100): Medication Adherence Data Questionnaire | Change in BMQ question 'I want to do all my prescribed medications in the next 2 weeks (0-7) | Change in BMQ Necessities score (2-5)                          | Change in BMQ Concerns score (1-3) | Change in BMQ question 'I am confident I can do all my prescribed medications in the next 2 weeks (0-7) | Change in PAM activation score (0-100) | Change in SRBAI score (0-28) | Change in CHAOS score (0-24) | Change in no. of BMQ barriers ticked (0-6) |
| <b>n Overall</b>                | 30                                                                    | 31                                                                                           | 31                                                             | 31                                 | 31                                                                                                      | 31                                     | 31                           | 31                           | 31                                         |
| <b>Mean (SD) overall</b>        | 2.07(27.87)                                                           | -0.1(1.27)                                                                                   | 0.26(0.58)                                                     | -0.19(0.31)                        | 0.06(1.79)                                                                                              | -<br>2.38(14.01)                       | 0.32(3.92)                   | 0.1(2.75)                    | -1.84(3.44)                                |
| <b>Qualitative case studies</b> |                                                                       |                                                                                              |                                                                |                                    |                                                                                                         |                                        |                              |                              |                                            |
|                                 | baseline(change)<br>%                                                 | <b>baseline (change)</b>                                                                     |                                                                |                                    | <b>baseline (change)</b>                                                                                |                                        |                              |                              |                                            |
| <b>High adherence at end</b>    |                                                                       |                                                                                              |                                                                |                                    |                                                                                                         |                                        |                              |                              |                                            |
| R01/39                          | 85(14)                                                                | 7(0)                                                                                         | 0.5                                                            | -0.4                               | 7(0)                                                                                                    | -5.9                                   | -2                           | 2                            | -4                                         |
| R02/07                          | 100(-2)                                                               | 7(0)                                                                                         | 0.2                                                            | -0.2                               | 7(0)                                                                                                    | 0                                      | 1                            | -5                           | -3                                         |
| R01/40                          | 92(8)                                                                 | 7(0)                                                                                         | 0.6                                                            | -0.2                               | 5(1)                                                                                                    | 7.2                                    | -9                           | 0                            | 1                                          |
| R02/52                          | 95(-25)                                                               | 7(0)                                                                                         | 0.3                                                            | -0.2                               | 7(0)                                                                                                    | 4.9                                    | 3                            | -1                           | 1                                          |

|                             |         |       |      |      |       |       |    |    |    |
|-----------------------------|---------|-------|------|------|-------|-------|----|----|----|
| R01/49                      | 100(0)  | 7(0)  | -0.8 | -0.7 | 7(0)  | 9.9   | -1 | 0  | -4 |
| <b>Low adherence at end</b> |         |       |      |      |       |       |    |    |    |
| R01/54                      | 60(-10) | 7(-1) | -0.3 | 0.4  | 6(0)  | -7.9  | 1  | -1 | 6  |
| R01/02                      | 55(16)  | 7(0)  | 0.8  | -0.2 | 2(3)  | 0     | -1 | -1 | -2 |
| R01/48                      | 0(100)  | 7(0)  | 0.9  | -0.8 | 6(0)  | 0     | 0  | 0  | -2 |
| R02/12                      | NA      | 7(0)  | -0.1 | -0.7 | 4(0)  | 14.6  | -3 | -2 | -5 |
| R02/03                      | 50(NA)  | 1(NA) | NA   | NA   | 2(NA) | NA    | NA | NA | NA |
| R01/44                      | 0(0)    | 7(0)  | 1.4  | 0.2  | 5(-4) | -16.6 | 0  | -1 | -5 |
| <b>Withdrawn</b>            |         |       |      |      |       |       |    |    |    |
| R01/42                      | 0(0)    | 5(-1) | -0.3 | -0.1 | 4(0)  | -5    | -1 | 5  | -6 |
| R02/02                      | 80(10)  | 7(0)  | 0.1  | -0.5 | 7(0)  | 9.2   | 2  | -1 | 1  |
| R02/42                      | 100(0)  | 7(0)  | 0.9  | 0    | 7(0)  | -12.1 | 1  | 7  | -1 |



Table g. Intermediate Outcomes

|                                                     | End of trial adherence<br>(day 150-180)♦ | Change in Objective<br>adherence♦ (%) | Change in<br>FEV1 | Number of<br>exacerbations in 6<br>months |
|-----------------------------------------------------|------------------------------------------|---------------------------------------|-------------------|-------------------------------------------|
| <b>Mean (SD)+/ Median (IQR)*<br/>overall (n=33)</b> | <u>34.7 ( 0.4 , 78 )*</u>                | <u>1.25( -5.8 , 36.3 )*</u>           | <u>0.1(0.51)+</u> | <u>1( 0 , 2 )*</u>                        |
| <b>Qualitative case studies</b>                     |                                          |                                       |                   |                                           |
| <b>High adherence at end</b>                        |                                          |                                       |                   |                                           |
| R01/39                                              | 95.2                                     | 95.16                                 | -0.02             | 1                                         |
| R02/07                                              | 93.5                                     | -3.12                                 | NA                | 0                                         |
| R01/40                                              | 88.2                                     | 45.07                                 | 0.22              | 0                                         |
| R02/52                                              | 83.9                                     | -12.68                                | -0.13             | 0                                         |
| <b>Medium adherence at end</b>                      |                                          |                                       |                   |                                           |
| R01/49                                              | 68.3                                     | 55.06                                 | -0.12             | 3                                         |
| <b>Low adherence at end</b>                         |                                          |                                       |                   |                                           |
| R01/54                                              | 29                                       | -15.8                                 | -0.03             | 2                                         |
| R01/02                                              | 29                                       | -1.14                                 | 0                 | 0                                         |
| R01/48                                              | 5.2                                      | 3.34                                  | 1.07              | 0                                         |
| R02/12                                              | 0                                        | -10.23                                | -0.21             | 0                                         |
| R02/03                                              | 0                                        | -5.42                                 | NA                | NA                                        |
| R01/44                                              | 0                                        | -19.54                                | 0.9               | 1                                         |
| <b>Withdrawn</b>                                    |                                          |                                       |                   |                                           |
| R01/42                                              | NA                                       | NA                                    | 0                 | 0                                         |
| R02/02                                              | NA                                       | NA                                    | -0.04             | 3                                         |
| R02/42                                              | NA                                       | NA                                    | 0.35              | 1                                         |

♦ Normative numerator adjusted adherence
